# Supplementary material for: Asymmetry of Motifs Conservation within Homotypic Composite Elements Differentiates DNA-Binding Domains of Target Transcription Factors in ChIP-Seq Data
Source: Preprints.org preprint supplement (doi:10.20944/preprints202311.1617.v1), 2023-11-27
Supplement: Supplementary file 2 [file Supplementary_Tables_S1_S10.xlsx]

## Sheet: Table_S1
Table S1. The filtration of the benchmark collection of 1553 ChIP-seq datasets of M. musculus. For each dataset, we provide GTRD ID (Kolmykov et al., 2021), the target TF name, gene ID from ENSEMBL and the names of its superclass and class (TFClass, Wingender et al., 2015, 2018). The AME p-value (McLeay and Bailey, 2010) marks the enrichment of known motifs of target TFs (JASPAR, Castro-Mondragon…
#	GTRD			TFClass		P-value, AME	PWM
	ID	TF	ENSEMBL gene ID	Superclass	Class		P-value, TomTom	Motif ID	Database	TF Name in database
1	PEAKS035844	AHR	ENSMUSG00000019256	Basic domains{1}	Basic helix-loop-helix factors (bHLH){1.2}	6.47e-17	1	0	JASPAR	NA
2	PEAKS040810	AHR	ENSMUSG00000019256	Basic domains{1}	Basic helix-loop-helix factors (bHLH){1.2}	5.36e-250	1	0	JASPAR	NA
3	PEAKS040811	AHR	ENSMUSG00000019256	Basic domains{1}	Basic helix-loop-helix factors (bHLH){1.2}	5.33e-241	1	0	JASPAR	NA
4	PEAKS040812	AHR	ENSMUSG00000019256	Basic domains{1}	Basic helix-loop-helix factors (bHLH){1.2}	5.98e-253	1	0	JASPAR	NA
5	PEAKS040813	AHR	ENSMUSG00000019256	Basic domains{1}	Basic helix-loop-helix factors (bHLH){1.2}	4.23e-257	1	0	JASPAR	NA
6	PEAKS040814	AHR	ENSMUSG00000019256	Basic domains{1}	Basic helix-loop-helix factors (bHLH){1.2}	1.36e-277	1	0	JASPAR	NA
7	PEAKS040815	AHR	ENSMUSG00000019256	Basic domains{1}	Basic helix-loop-helix factors (bHLH){1.2}	1.08e-217	1	0	JASPAR	NA
8	PEAKS040818	AHR	ENSMUSG00000019256	Basic domains{1}	Basic helix-loop-helix factors (bHLH){1.2}	1.1e-222	1	0	JASPAR	NA
9	PEAKS040612	AIRE	ENSMUSG00000000731	α-Helices exposed by β-structures{5}	SAND domain factors{5.3}	1	1	0	JASPAR	NA
10	PEAKS035586	AR	ENSMUSG00000046532	Zinc-coordinating DNA-binding domains{2}	Nuclear receptors with C4 zinc fingers{2.1}	0	3.13e-11	MA0007.3	JASPAR	AR
11	PEAKS035588	AR	ENSMUSG00000046532	Zinc-coordinating DNA-binding domains{2}	Nuclear receptors with C4 zinc fingers{2.1}	0	1.38e-12	MA0007.3	JASPAR	AR
12	PEAKS035590	AR	ENSMUSG00000046532	Zinc-coordinating DNA-binding domains{2}	Nuclear receptors with C4 zinc fingers{2.1}	5.42e-270	1.02e-12	MA0007.3	JASPAR	AR
13	PEAKS035592	AR	ENSMUSG00000046532	Zinc-coordinating DNA-binding domains{2}	Nuclear receptors with C4 zinc fingers{2.1}	7.7e-306	6.8e-13	MA0007.3	JASPAR	AR
14	PEAKS036281	AR	ENSMUSG00000046532	Zinc-coordinating DNA-binding domains{2}	Nuclear receptors with C4 zinc fingers{2.1}	0	5.86e-13	MA0007.3	JASPAR	AR
15	PEAKS036285	AR	ENSMUSG00000046532	Zinc-coordinating DNA-binding domains{2}	Nuclear receptors with C4 zinc fingers{2.1}	0	1.09e-12	MA0007.3	JASPAR	AR
16	PEAKS036287	AR	ENSMUSG00000046532	Zinc-coordinating DNA-binding domains{2}	Nuclear receptors with C4 zinc fingers{2.1}	6.23e-292	1.57e-11	MA0007.3	JASPAR	AR
17	PEAKS036289	AR	ENSMUSG00000046532	Zinc-coordinating DNA-binding domains{2}	Nuclear receptors with C4 zinc fingers{2.1}	0	3.22e-11	MA0727.1	JASPAR	NR3C2
18	PEAKS036541	AR	ENSMUSG00000046532	Zinc-coordinating DNA-binding domains{2}	Nuclear receptors with C4 zinc fingers{2.1}	0	1.7e-13	MA0007.3	JASPAR	AR
19	PEAKS036542	AR	ENSMUSG00000046532	Zinc-coordinating DNA-binding domains{2}	Nuclear receptors with C4 zinc fingers{2.1}	0	4.58e-13	MA0007.3	JASPAR	AR
20	PEAKS036543	AR	ENSMUSG00000046532	Zinc-coordinating DNA-binding domains{2}	Nuclear receptors with C4 zinc fingers{2.1}	0	3.76e-12	MA0727.1	JASPAR	NR3C2
21	PEAKS036544	AR	ENSMUSG00000046532	Zinc-coordinating DNA-binding domains{2}	Nuclear receptors with C4 zinc fingers{2.1}	0	2.25e-12	MA0727.1	JASPAR	NR3C2
22	PEAKS036545	AR	ENSMUSG00000046532	Zinc-coordinating DNA-binding domains{2}	Nuclear receptors with C4 zinc fingers{2.1}	0	4.46e-14	MA0007.3	JASPAR	AR
23	PEAKS050693	AR	ENSMUSG00000046532	Zinc-coordinating DNA-binding domains{2}	Nuclear receptors with C4 zinc fingers{2.1}	0	1.01e-11	MA0007.3	JASPAR	AR
24	PEAKS050694	AR	ENSMUSG00000046532	Zinc-coordinating DNA-binding domains{2}	Nuclear receptors with C4 zinc fingers{2.1}	0	3.01e-12	MA0007.3	JASPAR	AR
25	PEAKS057419	AR	ENSMUSG00000046532	Zinc-coordinating DNA-binding domains{2}	Nuclear receptors with C4 zinc fingers{2.1}	7.98e-113	4.66e-12	MA0007.3	JASPAR	AR
26	PEAKS055351	ARNT2	ENSMUSG00000015709	Basic domains{1}	Basic helix-loop-helix factors (bHLH){1.2}	4.92e-182	0.000573	MA1560.1	JASPAR	SOHLH2
27	PEAKS055352	ARNT2	ENSMUSG00000015709	Basic domains{1}	Basic helix-loop-helix factors (bHLH){1.2}	5.99e-128	9.97e-05	MA1995.1	JASPAR	NPAS4
28	PEAKS050661	ARNTL	ENSMUSG00000055116	Basic domains{1}	Basic helix-loop-helix factors (bHLH){1.2}	9.38e-273	5.29e-07	MA1464.1	JASPAR	ARNT2
29	PEAKS050663	ARNTL	ENSMUSG00000055116	Basic domains{1}	Basic helix-loop-helix factors (bHLH){1.2}	1.34e-244	6.86e-07	MA1464.1	JASPAR	ARNT2
30	PEAKS050664	ARNTL	ENSMUSG00000055116	Basic domains{1}	Basic helix-loop-helix factors (bHLH){1.2}	2.03e-263	1.85e-05	MA0626.1	JASPAR	NPAS2
31	PEAKS050674	ARNTL	ENSMUSG00000055116	Basic domains{1}	Basic helix-loop-helix factors (bHLH){1.2}	9.06e-237	6.97e-07	MA1464.1	JASPAR	ARNT2
32	PEAKS050676	ARNTL	ENSMUSG00000055116	Basic domains{1}	Basic helix-loop-helix factors (bHLH){1.2}	2.43e-210	5.64e-07	MA0626.1	JASPAR	NPAS2
33	PEAKS050678	ARNTL	ENSMUSG00000055116	Basic domains{1}	Basic helix-loop-helix factors (bHLH){1.2}	5.71e-198	7.76e-07	MA1464.1	JASPAR	ARNT2
34	PEAKS050680	ARNTL	ENSMUSG00000055116	Basic domains{1}	Basic helix-loop-helix factors (bHLH){1.2}	1.26e-238	3.62e-07	MA1464.1	JASPAR	ARNT2
35	PEAKS057547	ARNTL	ENSMUSG00000055116	Basic domains{1}	Basic helix-loop-helix factors (bHLH){1.2}	1.41e-123	1.59e-05	MA0626.1	JASPAR	NPAS2
36	PEAKS057548	ARNTL	ENSMUSG00000055116	Basic domains{1}	Basic helix-loop-helix factors (bHLH){1.2}	8.83e-214	9.95e-06	MA0626.1	JASPAR	NPAS2
37	PEAKS057549	ARNTL	ENSMUSG00000055116	Basic domains{1}	Basic helix-loop-helix factors (bHLH){1.2}	1.33e-177	6.42e-07	MA1464.1	JASPAR	ARNT2
38	PEAKS057550	ARNTL	ENSMUSG00000055116	Basic domains{1}	Basic helix-loop-helix factors (bHLH){1.2}	4.74e-161	8.77e-07	MA0603.1	JASPAR	ARNTL
39	PEAKS057551	ARNTL	ENSMUSG00000055116	Basic domains{1}	Basic helix-loop-helix factors (bHLH){1.2}	1.33e-160	1.46e-06	MA1560.1	JASPAR	SOHLH2
40	PEAKS057553	ARNTL	ENSMUSG00000055116	Basic domains{1}	Basic helix-loop-helix factors (bHLH){1.2}	4.93e-224	8.06e-07	MA0603.1	JASPAR	ARNTL
41	PEAKS057554	ARNTL	ENSMUSG00000055116	Basic domains{1}	Basic helix-loop-helix factors (bHLH){1.2}	1.64e-220	5.72e-07	MA1464.1	JASPAR	ARNT2
42	PEAKS038157	ASCL1	ENSMUSG00000020052	Basic domains{1}	Basic helix-loop-helix factors (bHLH){1.2}	0	1.89e-07	MA1631.1	JASPAR	ASCL1
43	PEAKS037311	ATF3	ENSMUSG00000026628	Basic domains{1}	Basic leucine zipper factors (bZIP){1.1}	3.84e-276	1.85e-10	MA1988.1	JASPAR	ATF3
44	PEAKS040983	ATF3	ENSMUSG00000026628	Basic domains{1}	Basic leucine zipper factors (bZIP){1.1}	5.44e-296	9.41e-07	MA1988.1	JASPAR	ATF3
45	PEAKS040984	ATF3	ENSMUSG00000026628	Basic domains{1}	Basic leucine zipper factors (bZIP){1.1}	0	1.65e-06	MA1988.1	JASPAR	ATF3
46	PEAKS040985	ATF3	ENSMUSG00000026628	Basic domains{1}	Basic leucine zipper factors (bZIP){1.1}	0	1.21e-10	MA0478.1	JASPAR	FOSL2
47	PEAKS040986	ATF3	ENSMUSG00000026628	Basic domains{1}	Basic leucine zipper factors (bZIP){1.1}	0	3.08e-10	MA0476.1	JASPAR	FOS
48	PEAKS040987	ATF3	ENSMUSG00000026628	Basic domains{1}	Basic leucine zipper factors (bZIP){1.1}	0	9.66e-06	MA1988.1	JASPAR	ATF3
49	PEAKS054850	ATF3	ENSMUSG00000026628	Basic domains{1}	Basic leucine zipper factors (bZIP){1.1}	0	7.73e-11	MA0478.1	JASPAR	FOSL2
50	PEAKS054851	ATF3	ENSMUSG00000026628	Basic domains{1}	Basic leucine zipper factors (bZIP){1.1}	5.14e-244	4.78e-07	MA0478.1	JASPAR	FOSL2
51	PEAKS054866	ATF3	ENSMUSG00000026628	Basic domains{1}	Basic leucine zipper factors (bZIP){1.1}	0	4.6e-10	MA0478.1	JASPAR	FOSL2
52	PEAKS054867	ATF3	ENSMUSG00000026628	Basic domains{1}	Basic leucine zipper factors (bZIP){1.1}	7.17e-245	9.96e-11	MA0478.1	JASPAR	FOSL2
53	PEAKS035427	ATOH1	ENSMUSG00000073043	Basic domains{1}	Basic helix-loop-helix factors (bHLH){1.2}	4.17e-217	1.06e-07	MA0668.2	JASPAR	NEUROD2
54	PEAKS040056	ATOH1	ENSMUSG00000073043	Basic domains{1}	Basic helix-loop-helix factors (bHLH){1.2}	3.71e-76	4.77e-07	MA1635.1	JASPAR	BHLHE22
55	PEAKS040057	ATOH1	ENSMUSG00000073043	Basic domains{1}	Basic helix-loop-helix factors (bHLH){1.2}	2.7e-72	0.344	MA1620.1	JASPAR	PTF1A
56	PEAKS036204	BACH2	ENSMUSG00000040270	Basic domains{1}	Basic leucine zipper factors (bZIP){1.1}	0	1.09e-07	MA0150.2	JASPAR	NFE2L2
57	PEAKS040349	BACH2	ENSMUSG00000040270	Basic domains{1}	Basic leucine zipper factors (bZIP){1.1}	0	6.52e-09	MA0150.2	JASPAR	NFE2L2
58	PEAKS035635	BATF	ENSMUSG00000034266	Basic domains{1}	Basic leucine zipper factors (bZIP){1.1}	7.72e-261	6.34e-06	MA1634.1	JASPAR	BATF
59	PEAKS036037	BATF	ENSMUSG00000034266	Basic domains{1}	Basic leucine zipper factors (bZIP){1.1}	2.4e-230	4.77e-06	MA1634.1	JASPAR	BATF
60	PEAKS036040	BATF	ENSMUSG00000034266	Basic domains{1}	Basic leucine zipper factors (bZIP){1.1}	6.8e-118	1.22e-08	MA0835.2	JASPAR	BATF3
61	PEAKS036041	BATF	ENSMUSG00000034266	Basic domains{1}	Basic leucine zipper factors (bZIP){1.1}	4.06e-175	1.88e-06	MA1634.1	JASPAR	BATF
62	PEAKS036045	BATF	ENSMUSG00000034266	Basic domains{1}	Basic leucine zipper factors (bZIP){1.1}	0	4.84e-08	MA1634.1	JASPAR	BATF
63	PEAKS036582	BATF	ENSMUSG00000034266	Basic domains{1}	Basic leucine zipper factors (bZIP){1.1}	8.76e-194	6.99e-06	MA1634.1	JASPAR	BATF
64	PEAKS040193	BATF	ENSMUSG00000034266	Basic domains{1}	Basic leucine zipper factors (bZIP){1.1}	5.01e-296	3.15e-07	MA1634.1	JASPAR	BATF
65	PEAKS040269	BATF	ENSMUSG00000034266	Basic domains{1}	Basic leucine zipper factors (bZIP){1.1}	3.77e-258	4.19e-08	MA1634.1	JASPAR	BATF
66	PEAKS040270	BATF	ENSMUSG00000034266	Basic domains{1}	Basic leucine zipper factors (bZIP){1.1}	1.69e-286	3.4e-08	MA1634.1	JASPAR	BATF
67	PEAKS041042	BATF	ENSMUSG00000034266	Basic domains{1}	Basic leucine zipper factors (bZIP){1.1}	1.48e-301	8.63e-09	MA1634.1	JASPAR	BATF
68	PEAKS041043	BATF	ENSMUSG00000034266	Basic domains{1}	Basic leucine zipper factors (bZIP){1.1}	1.18e-211	9.46e-08	MA1634.1	JASPAR	BATF
69	PEAKS041044	BATF	ENSMUSG00000034266	Basic domains{1}	Basic leucine zipper factors (bZIP){1.1}	1.03e-262	1.55e-06	MA0835.2	JASPAR	BATF3
70	PEAKS041045	BATF	ENSMUSG00000034266	Basic domains{1}	Basic leucine zipper factors (bZIP){1.1}	7.55e-297	1.16e-06	MA1634.1	JASPAR	BATF
71	PEAKS041046	BATF	ENSMUSG00000034266	Basic domains{1}	Basic leucine zipper factors (bZIP){1.1}	9.72e-48	0.488	MA1634.1	JASPAR	BATF
72	PEAKS041047	BATF	ENSMUSG00000034266	Basic domains{1}	Basic leucine zipper factors (bZIP){1.1}	9.41e-206	7.58e-06	MA1634.1	JASPAR	BATF
73	PEAKS041048	BATF	ENSMUSG00000034266	Basic domains{1}	Basic leucine zipper factors (bZIP){1.1}	7.08e-185	1.1e-08	MA1634.1	JASPAR	BATF
74	PEAKS041049	BATF	ENSMUSG00000034266	Basic domains{1}	Basic leucine zipper factors (bZIP){1.1}	3.73e-247	3.6e-06	MA1634.1	JASPAR	BATF
75	PEAKS041050	BATF	ENSMUSG00000034266	Basic domains{1}	Basic leucine zipper factors (bZIP){1.1}	1.32e-201	8.93e-07	MA1634.1	JASPAR	BATF
76	PEAKS041051	BATF	ENSMUSG00000034266	Basic domains{1}	Basic leucine zipper factors (bZIP){1.1}	3.56e-164	2.79e-06	MA1634.1	JASPAR	BATF
77	PEAKS041052	BATF	ENSMUSG00000034266	Basic domains{1}	Basic leucine zipper factors (bZIP){1.1}	1.72e-276	8.01e-07	MA1634.1	JASPAR	BATF
78	PEAKS041054	BATF	ENSMUSG00000034266	Basic domains{1}	Basic leucine zipper factors (bZIP){1.1}	1.21e-281	6.22e-07	MA1634.1	JASPAR	BATF
79	PEAKS041055	BATF	ENSMUSG00000034266	Basic domains{1}	Basic leucine zipper factors (bZIP){1.1}	9.68e-308	2.47e-07	MA1634.1	JASPAR	BATF
80	PEAKS037876	BATF3	ENSMUSG00000026630	Basic domains{1}	Basic leucine zipper factors (bZIP){1.1}	5.45e-24	0.0122	MA1634.1	JASPAR	BATF
81	PEAKS040668	BCL11B	ENSMUSG00000048251	Zinc-coordinating DNA-binding domains{2}	C2H2 zinc finger factors{2.3}	1.53e-70	0.000125	MA1508.1	JASPAR	IKZF1
82	PEAKS048666	BCL11B	ENSMUSG00000048251	Zinc-coordinating DNA-binding domains{2}	C2H2 zinc finger factors{2.3}	1.64e-36	0.000216	MA1652.1	JASPAR	ZKSCAN5
83	PEAKS049421	BCL11B	ENSMUSG00000048251	Zinc-coordinating DNA-binding domains{2}	C2H2 zinc finger factors{2.3}	4.34e-36	0.00584	MA1508.1	JASPAR	IKZF1
84	PEAKS049422	BCL11B	ENSMUSG00000048251	Zinc-coordinating DNA-binding domains{2}	C2H2 zinc finger factors{2.3}	2.5e-51	0.00776	MA0131.2	JASPAR	HINFP
85	PEAKS049423	BCL11B	ENSMUSG00000048251	Zinc-coordinating DNA-binding domains{2}	C2H2 zinc finger factors{2.3}	2.86e-32	0.0084	MA1652.1	JASPAR	ZKSCAN5
86	PEAKS057190	BCL11B	ENSMUSG00000048251	Zinc-coordinating DNA-binding domains{2}	C2H2 zinc finger factors{2.3}	5.25e-18	1	#N/A	#N/A	#N/A
87	PEAKS057194	BCL11B	ENSMUSG00000048251	Zinc-coordinating DNA-binding domains{2}	C2H2 zinc finger factors{2.3}	6.22e-22	1	#N/A	#N/A	#N/A
88	PEAKS057195	BCL11B	ENSMUSG00000048251	Zinc-coordinating DNA-binding domains{2}	C2H2 zinc finger factors{2.3}	2.08e-15	1	#N/A	#N/A	#N/A
89	PEAKS035263	BCL6	ENSMUSG00000022508	Zinc-coordinating DNA-binding domains{2}	C2H2 zinc finger factors{2.3}	3.32e-102	3.49e-08	MA0463.2	JASPAR	BCL6
90	PEAKS035264	BCL6	ENSMUSG00000022508	Zinc-coordinating DNA-binding domains{2}	C2H2 zinc finger factors{2.3}	1.04e-154	3.28e-09	MA0463.2	JASPAR	BCL6
91	PEAKS038427	BCL6	ENSMUSG00000022508	Zinc-coordinating DNA-binding domains{2}	C2H2 zinc finger factors{2.3}	2.56e-67	0.00573	MA1155.1	JASPAR	ZSCAN4
92	PEAKS055017	BCL6	ENSMUSG00000022508	Zinc-coordinating DNA-binding domains{2}	C2H2 zinc finger factors{2.3}	1.57e-157	1.81e-08	MA0463.2	JASPAR	BCL6
93	PEAKS055018	BCL6	ENSMUSG00000022508	Zinc-coordinating DNA-binding domains{2}	C2H2 zinc finger factors{2.3}	5.47e-108	8.49e-08	MA0463.2	JASPAR	BCL6
94	PEAKS055019	BCL6	ENSMUSG00000022508	Zinc-coordinating DNA-binding domains{2}	C2H2 zinc finger factors{2.3}	1.52e-108	2.67e-09	MA0463.2	JASPAR	BCL6
95	PEAKS055020	BCL6	ENSMUSG00000022508	Zinc-coordinating DNA-binding domains{2}	C2H2 zinc finger factors{2.3}	7.58e-158	0.0197	MA0038.2	JASPAR	GFI1
96	PEAKS055021	BCL6	ENSMUSG00000022508	Zinc-coordinating DNA-binding domains{2}	C2H2 zinc finger factors{2.3}	1.49e-173	0.000914	MA0038.2	JASPAR	GFI1
97	PEAKS055022	BCL6	ENSMUSG00000022508	Zinc-coordinating DNA-binding domains{2}	C2H2 zinc finger factors{2.3}	8.49e-146	1.09e-08	MA0463.2	JASPAR	BCL6
98	PEAKS057221	BCL6	ENSMUSG00000022508	Zinc-coordinating DNA-binding domains{2}	C2H2 zinc finger factors{2.3}	1.88e-205	1.72e-08	MA0463.2	JASPAR	BCL6
99	PEAKS039234	BHLHA15	ENSMUSG00000052271	Basic domains{1}	Basic helix-loop-helix factors (bHLH){1.2}	0	1.38e-07	MA0668.2	JASPAR	NEUROD2
100	PEAKS039235	BHLHA15	ENSMUSG00000052271	Basic domains{1}	Basic helix-loop-helix factors (bHLH){1.2}	0	3.28e-07	MA1993.1	JASPAR	NEUROD2
101	PEAKS055622	BHLHE40	ENSMUSG00000030103	Basic domains{1}	Basic helix-loop-helix factors (bHLH){1.2}	0	3.88e-09	MA0464.2	JASPAR	BHLHE40
102	PEAKS055623	BHLHE40	ENSMUSG00000030103	Basic domains{1}	Basic helix-loop-helix factors (bHLH){1.2}	0	1.91e-06	MA0464.2	JASPAR	BHLHE40
103	PEAKS057576	BHLHE40	ENSMUSG00000030103	Basic domains{1}	Basic helix-loop-helix factors (bHLH){1.2}	3.38e-273	5.4e-08	MA0464.2	JASPAR	BHLHE40
104	PEAKS040678	BHLHE41	ENSMUSG00000030256	Basic domains{1}	Basic helix-loop-helix factors (bHLH){1.2}	5.54e-211	1.31e-06	MA0464.2	JASPAR	BHLHE40
105	PEAKS040679	BHLHE41	ENSMUSG00000030256	Basic domains{1}	Basic helix-loop-helix factors (bHLH){1.2}	1.84e-218	1.67e-08	MA0464.2	JASPAR	BHLHE40
106	PEAKS035381	CDX2	ENSMUSG00000029646	Helix-turn-helix domains{3}	Homeo domain factors{3.1}	0	2.43e-11	MA1473.1	JASPAR	CDX4
107	PEAKS054441	CDX2	ENSMUSG00000029646	Helix-turn-helix domains{3}	Homeo domain factors{3.1}	2.42e-184	4.07e-07	MA0878.3	JASPAR	CDX1
108	PEAKS055170	CDX2	ENSMUSG00000029646	Helix-turn-helix domains{3}	Homeo domain factors{3.1}	4.84e-14	1	#N/A	#N/A	#N/A
109	PEAKS035677	CEBPA	ENSMUSG00000034957	Basic domains{1}	Basic leucine zipper factors (bZIP){1.1}	0	2.57e-10	MA0836.2	JASPAR	CEBPD
110	PEAKS036125	CEBPA	ENSMUSG00000034957	Basic domains{1}	Basic leucine zipper factors (bZIP){1.1}	0	7.09e-10	MA0836.2	JASPAR	CEBPD
111	PEAKS036126	CEBPA	ENSMUSG00000034957	Basic domains{1}	Basic leucine zipper factors (bZIP){1.1}	0	1.08e-08	MA0836.2	JASPAR	CEBPD
112	PEAKS036127	CEBPA	ENSMUSG00000034957	Basic domains{1}	Basic leucine zipper factors (bZIP){1.1}	0	3.57e-09	MA0102.4	JASPAR	CEBPA
113	PEAKS036128	CEBPA	ENSMUSG00000034957	Basic domains{1}	Basic leucine zipper factors (bZIP){1.1}	0	2.71e-09	MA0836.2	JASPAR	CEBPD
114	PEAKS036129	CEBPA	ENSMUSG00000034957	Basic domains{1}	Basic leucine zipper factors (bZIP){1.1}	0	3.82e-11	MA0102.4	JASPAR	CEBPA
115	PEAKS036130	CEBPA	ENSMUSG00000034957	Basic domains{1}	Basic leucine zipper factors (bZIP){1.1}	0	2.19e-09	MA0102.4	JASPAR	CEBPA
116	PEAKS036131	CEBPA	ENSMUSG00000034957	Basic domains{1}	Basic leucine zipper factors (bZIP){1.1}	0	3.61e-09	MA0466.3	JASPAR	CEBPB
117	PEAKS036132	CEBPA	ENSMUSG00000034957	Basic domains{1}	Basic leucine zipper factors (bZIP){1.1}	0	5.09e-09	MA0836.2	JASPAR	CEBPD
118	PEAKS036241	CEBPA	ENSMUSG00000034957	Basic domains{1}	Basic leucine zipper factors (bZIP){1.1}	0	2.02e-09	MA0466.3	JASPAR	CEBPB
119	PEAKS036243	CEBPA	ENSMUSG00000034957	Basic domains{1}	Basic leucine zipper factors (bZIP){1.1}	0	7.6e-12	MA0836.2	JASPAR	CEBPD
120	PEAKS036316	CEBPA	ENSMUSG00000034957	Basic domains{1}	Basic leucine zipper factors (bZIP){1.1}	0	2.63e-09	MA0836.2	JASPAR	CEBPD
121	PEAKS036317	CEBPA	ENSMUSG00000034957	Basic domains{1}	Basic leucine zipper factors (bZIP){1.1}	0	1.21e-11	MA0836.2	JASPAR	CEBPD
122	PEAKS037787	CEBPA	ENSMUSG00000034957	Basic domains{1}	Basic leucine zipper factors (bZIP){1.1}	0	1.66e-11	MA0102.4	JASPAR	CEBPA
123	PEAKS037788	CEBPA	ENSMUSG00000034957	Basic domains{1}	Basic leucine zipper factors (bZIP){1.1}	0	1.04e-10	MA0102.4	JASPAR	CEBPA
124	PEAKS038345	CEBPA	ENSMUSG00000034957	Basic domains{1}	Basic leucine zipper factors (bZIP){1.1}	0	7.6e-10	MA0102.4	JASPAR	CEBPA
125	PEAKS039023	CEBPA	ENSMUSG00000034957	Basic domains{1}	Basic leucine zipper factors (bZIP){1.1}	0	1.25e-09	MA0466.3	JASPAR	CEBPB
126	PEAKS039031	CEBPA	ENSMUSG00000034957	Basic domains{1}	Basic leucine zipper factors (bZIP){1.1}	0	3e-11	MA0836.2	JASPAR	CEBPD
127	PEAKS039045	CEBPA	ENSMUSG00000034957	Basic domains{1}	Basic leucine zipper factors (bZIP){1.1}	0	5.46e-10	MA0836.2	JASPAR	CEBPD
128	PEAKS039785	CEBPA	ENSMUSG00000034957	Basic domains{1}	Basic leucine zipper factors (bZIP){1.1}	0	1.14e-09	MA0836.2	JASPAR	CEBPD
129	PEAKS039786	CEBPA	ENSMUSG00000034957	Basic domains{1}	Basic leucine zipper factors (bZIP){1.1}	0	9.3e-10	MA0102.4	JASPAR	CEBPA
130	PEAKS040017	CEBPA	ENSMUSG00000034957	Basic domains{1}	Basic leucine zipper factors (bZIP){1.1}	3e-223	1.9e-07	MA0102.4	JASPAR	CEBPA
131	PEAKS040018	CEBPA	ENSMUSG00000034957	Basic domains{1}	Basic leucine zipper factors (bZIP){1.1}	0	3.15e-09	MA0102.4	JASPAR	CEBPA
132	PEAKS040019	CEBPA	ENSMUSG00000034957	Basic domains{1}	Basic leucine zipper factors (bZIP){1.1}	0	3.78e-12	MA0102.4	JASPAR	CEBPA
133	PEAKS041011	CEBPA	ENSMUSG00000034957	Basic domains{1}	Basic leucine zipper factors (bZIP){1.1}	0	2.12e-09	MA0102.4	JASPAR	CEBPA
134	PEAKS048526	CEBPA	ENSMUSG00000034957	Basic domains{1}	Basic leucine zipper factors (bZIP){1.1}	0	2.12e-10	MA0836.2	JASPAR	CEBPD
135	PEAKS054852	CEBPA	ENSMUSG00000034957	Basic domains{1}	Basic leucine zipper factors (bZIP){1.1}	0	1.82e-09	MA0466.3	JASPAR	CEBPB
136	PEAKS054853	CEBPA	ENSMUSG00000034957	Basic domains{1}	Basic leucine zipper factors (bZIP){1.1}	0	6.83e-13	MA0836.2	JASPAR	CEBPD
137	PEAKS057210	CEBPA	ENSMUSG00000034957	Basic domains{1}	Basic leucine zipper factors (bZIP){1.1}	0	9.77e-12	MA0836.2	JASPAR	CEBPD
138	PEAKS057211	CEBPA	ENSMUSG00000034957	Basic domains{1}	Basic leucine zipper factors (bZIP){1.1}	0	4.86e-10	MA0836.2	JASPAR	CEBPD
139	PEAKS059098	CEBPA	ENSMUSG00000034957	Basic domains{1}	Basic leucine zipper factors (bZIP){1.1}	0	2.31e-08	MA0102.4	JASPAR	CEBPA
140	PEAKS059099	CEBPA	ENSMUSG00000034957	Basic domains{1}	Basic leucine zipper factors (bZIP){1.1}	0	1.32e-09	MA0102.4	JASPAR	CEBPA
141	PEAKS059100	CEBPA	ENSMUSG00000034957	Basic domains{1}	Basic leucine zipper factors (bZIP){1.1}	0	1.01e-08	MA0836.2	JASPAR	CEBPD
142	PEAKS059101	CEBPA	ENSMUSG00000034957	Basic domains{1}	Basic leucine zipper factors (bZIP){1.1}	0	8.29e-09	MA0102.4	JASPAR	CEBPA
143	PEAKS035505	CEBPB	ENSMUSG00000056501	Basic domains{1}	Basic leucine zipper factors (bZIP){1.1}	0	6.23e-09	MA0102.4	JASPAR	CEBPA
144	PEAKS035512	CEBPB	ENSMUSG00000056501	Basic domains{1}	Basic leucine zipper factors (bZIP){1.1}	1.6e-296	3.91e-09	MA1636.1	JASPAR	CEBPG
145	PEAKS035613	CEBPB	ENSMUSG00000056501	Basic domains{1}	Basic leucine zipper factors (bZIP){1.1}	0	5.54e-11	MA0466.3	JASPAR	CEBPB
146	PEAKS035614	CEBPB	ENSMUSG00000056501	Basic domains{1}	Basic leucine zipper factors (bZIP){1.1}	0	1.68e-11	MA0836.2	JASPAR	CEBPD
147	PEAKS035615	CEBPB	ENSMUSG00000056501	Basic domains{1}	Basic leucine zipper factors (bZIP){1.1}	3.05e-299	1.81e-10	MA0466.3	JASPAR	CEBPB
148	PEAKS035616	CEBPB	ENSMUSG00000056501	Basic domains{1}	Basic leucine zipper factors (bZIP){1.1}	0	1.3e-09	MA0836.2	JASPAR	CEBPD
149	PEAKS036133	CEBPB	ENSMUSG00000056501	Basic domains{1}	Basic leucine zipper factors (bZIP){1.1}	0	2.46e-08	MA0102.4	JASPAR	CEBPA
150	PEAKS036134	CEBPB	ENSMUSG00000056501	Basic domains{1}	Basic leucine zipper factors (bZIP){1.1}	1.56e-269	3.94e-07	MA0102.4	JASPAR	CEBPA
151	PEAKS036135	CEBPB	ENSMUSG00000056501	Basic domains{1}	Basic leucine zipper factors (bZIP){1.1}	0	7.65e-10	MA0836.2	JASPAR	CEBPD
152	PEAKS036136	CEBPB	ENSMUSG00000056501	Basic domains{1}	Basic leucine zipper factors (bZIP){1.1}	0	5.15e-09	MA0836.2	JASPAR	CEBPD
153	PEAKS036137	CEBPB	ENSMUSG00000056501	Basic domains{1}	Basic leucine zipper factors (bZIP){1.1}	0	5.3e-10	MA0102.4	JASPAR	CEBPA
154	PEAKS036138	CEBPB	ENSMUSG00000056501	Basic domains{1}	Basic leucine zipper factors (bZIP){1.1}	1.53e-276	5.34e-08	MA0836.2	JASPAR	CEBPD
155	PEAKS036139	CEBPB	ENSMUSG00000056501	Basic domains{1}	Basic leucine zipper factors (bZIP){1.1}	0	1.58e-09	MA0102.4	JASPAR	CEBPA
156	PEAKS036140	CEBPB	ENSMUSG00000056501	Basic domains{1}	Basic leucine zipper factors (bZIP){1.1}	0	4.26e-08	MA0102.4	JASPAR	CEBPA
157	PEAKS036205	CEBPB	ENSMUSG00000056501	Basic domains{1}	Basic leucine zipper factors (bZIP){1.1}	0	3.93e-09	MA0836.2	JASPAR	CEBPD
158	PEAKS036206	CEBPB	ENSMUSG00000056501	Basic domains{1}	Basic leucine zipper factors (bZIP){1.1}	0	2.61e-10	MA0837.2	JASPAR	CEBPE
159	PEAKS036208	CEBPB	ENSMUSG00000056501	Basic domains{1}	Basic leucine zipper factors (bZIP){1.1}	0	8.02e-10	MA0102.4	JASPAR	CEBPA
160	PEAKS036210	CEBPB	ENSMUSG00000056501	Basic domains{1}	Basic leucine zipper factors (bZIP){1.1}	0	4.18e-10	MA0836.2	JASPAR	CEBPD
161	PEAKS037271	CEBPB	ENSMUSG00000056501	Basic domains{1}	Basic leucine zipper factors (bZIP){1.1}	9.99e-213	5.98e-10	MA0836.2	JASPAR	CEBPD
162	PEAKS037272	CEBPB	ENSMUSG00000056501	Basic domains{1}	Basic leucine zipper factors (bZIP){1.1}	0	1.99e-11	MA0836.2	JASPAR	CEBPD
163	PEAKS037273	CEBPB	ENSMUSG00000056501	Basic domains{1}	Basic leucine zipper factors (bZIP){1.1}	0	4.93e-09	MA0102.4	JASPAR	CEBPA
164	PEAKS038884	CEBPB	ENSMUSG00000056501	Basic domains{1}	Basic leucine zipper factors (bZIP){1.1}	0	9.04e-11	MA0102.4	JASPAR	CEBPA
165	PEAKS038885	CEBPB	ENSMUSG00000056501	Basic domains{1}	Basic leucine zipper factors (bZIP){1.1}	0	8.66e-10	MA0836.2	JASPAR	CEBPD
166	PEAKS039022	CEBPB	ENSMUSG00000056501	Basic domains{1}	Basic leucine zipper factors (bZIP){1.1}	0	1.1e-09	MA0836.2	JASPAR	CEBPD
167	PEAKS039030	CEBPB	ENSMUSG00000056501	Basic domains{1}	Basic leucine zipper factors (bZIP){1.1}	0	1.66e-11	MA0836.2	JASPAR	CEBPD
168	PEAKS039038	CEBPB	ENSMUSG00000056501	Basic domains{1}	Basic leucine zipper factors (bZIP){1.1}	0	6.86e-12	MA0837.2	JASPAR	CEBPE
169	PEAKS039044	CEBPB	ENSMUSG00000056501	Basic domains{1}	Basic leucine zipper factors (bZIP){1.1}	0	5.26e-12	MA0102.4	JASPAR	CEBPA
170	PEAKS039787	CEBPB	ENSMUSG00000056501	Basic domains{1}	Basic leucine zipper factors (bZIP){1.1}	0	1.04e-10	MA0102.4	JASPAR	CEBPA
171	PEAKS039789	CEBPB	ENSMUSG00000056501	Basic domains{1}	Basic leucine zipper factors (bZIP){1.1}	0	5.97e-11	MA0102.4	JASPAR	CEBPA
172	PEAKS039790	CEBPB	ENSMUSG00000056501	Basic domains{1}	Basic leucine zipper factors (bZIP){1.1}	0	1.87e-05	MA0837.2	JASPAR	CEBPE
173	PEAKS040307	CEBPB	ENSMUSG00000056501	Basic domains{1}	Basic leucine zipper factors (bZIP){1.1}	0	2.59e-11	MA0836.2	JASPAR	CEBPD
174	PEAKS040308	CEBPB	ENSMUSG00000056501	Basic domains{1}	Basic leucine zipper factors (bZIP){1.1}	0	4.83e-10	MA0102.4	JASPAR	CEBPA
175	PEAKS040309	CEBPB	ENSMUSG00000056501	Basic domains{1}	Basic leucine zipper factors (bZIP){1.1}	0	3.33e-10	MA0836.2	JASPAR	CEBPD
176	PEAKS040958	CEBPB	ENSMUSG00000056501	Basic domains{1}	Basic leucine zipper factors (bZIP){1.1}	0	4.83e-11	MA0836.2	JASPAR	CEBPD
177	PEAKS040959	CEBPB	ENSMUSG00000056501	Basic domains{1}	Basic leucine zipper factors (bZIP){1.1}	0	3.17e-10	MA0836.2	JASPAR	CEBPD
178	PEAKS040960	CEBPB	ENSMUSG00000056501	Basic domains{1}	Basic leucine zipper factors (bZIP){1.1}	0	1.77e-09	MA0466.3	JASPAR	CEBPB
179	PEAKS040961	CEBPB	ENSMUSG00000056501	Basic domains{1}	Basic leucine zipper factors (bZIP){1.1}	0	7.23e-09	MA0102.4	JASPAR	CEBPA
180	PEAKS040962	CEBPB	ENSMUSG00000056501	Basic domains{1}	Basic leucine zipper factors (bZIP){1.1}	0	1.2e-09	MA0466.3	JASPAR	CEBPB
181	PEAKS049096	CEBPB	ENSMUSG00000056501	Basic domains{1}	Basic leucine zipper factors (bZIP){1.1}	0	1.45e-09	MA0836.2	JASPAR	CEBPD
182	PEAKS049097	CEBPB	ENSMUSG00000056501	Basic domains{1}	Basic leucine zipper factors (bZIP){1.1}	0	1.05e-09	MA0836.2	JASPAR	CEBPD
183	PEAKS049104	CEBPB	ENSMUSG00000056501	Basic domains{1}	Basic leucine zipper factors (bZIP){1.1}	0	1.34e-09	MA0836.2	JASPAR	CEBPD
184	PEAKS049106	CEBPB	ENSMUSG00000056501	Basic domains{1}	Basic leucine zipper factors (bZIP){1.1}	0	1.62e-12	MA0836.2	JASPAR	CEBPD
185	PEAKS049112	CEBPB	ENSMUSG00000056501	Basic domains{1}	Basic leucine zipper factors (bZIP){1.1}	0	5.63e-09	MA0836.2	JASPAR	CEBPD
186	PEAKS049114	CEBPB	ENSMUSG00000056501	Basic domains{1}	Basic leucine zipper factors (bZIP){1.1}	0	4.32e-09	MA0836.2	JASPAR	CEBPD
187	PEAKS049122	CEBPB	ENSMUSG00000056501	Basic domains{1}	Basic leucine zipper factors (bZIP){1.1}	0	2.52e-11	MA0102.4	JASPAR	CEBPA
188	PEAKS049124	CEBPB	ENSMUSG00000056501	Basic domains{1}	Basic leucine zipper factors (bZIP){1.1}	0	7.55e-11	MA0836.2	JASPAR	CEBPD
189	PEAKS049132	CEBPB	ENSMUSG00000056501	Basic domains{1}	Basic leucine zipper factors (bZIP){1.1}	0	1.72e-12	MA0836.2	JASPAR	CEBPD
190	PEAKS049133	CEBPB	ENSMUSG00000056501	Basic domains{1}	Basic leucine zipper factors (bZIP){1.1}	0	9.36e-11	MA0836.2	JASPAR	CEBPD
191	PEAKS049831	CEBPB	ENSMUSG00000056501	Basic domains{1}	Basic leucine zipper factors (bZIP){1.1}	0	5.51e-09	MA0102.4	JASPAR	CEBPA
192	PEAKS057212	CEBPB	ENSMUSG00000056501	Basic domains{1}	Basic leucine zipper factors (bZIP){1.1}	0	4.09e-09	MA0102.4	JASPAR	CEBPA
193	PEAKS057213	CEBPB	ENSMUSG00000056501	Basic domains{1}	Basic leucine zipper factors (bZIP){1.1}	0	3.01e-10	MA0102.4	JASPAR	CEBPA
194	PEAKS040963	CEBPD	ENSMUSG00000071637	Basic domains{1}	Basic leucine zipper factors (bZIP){1.1}	0	1.44e-11	MA0102.4	JASPAR	CEBPA
195	PEAKS040964	CEBPD	ENSMUSG00000071637	Basic domains{1}	Basic leucine zipper factors (bZIP){1.1}	0	2.58e-09	MA0837.2	JASPAR	CEBPE
196	PEAKS040965	CEBPD	ENSMUSG00000071637	Basic domains{1}	Basic leucine zipper factors (bZIP){1.1}	0	7.74e-10	MA0466.3	JASPAR	CEBPB
197	PEAKS040966	CEBPD	ENSMUSG00000071637	Basic domains{1}	Basic leucine zipper factors (bZIP){1.1}	0	2.86e-09	MA0102.4	JASPAR	CEBPA
198	PEAKS040967	CEBPD	ENSMUSG00000071637	Basic domains{1}	Basic leucine zipper factors (bZIP){1.1}	0	1.13e-09	MA0836.2	JASPAR	CEBPD
199	PEAKS039771	CEBPE	ENSMUSG00000052435	Basic domains{1}	Basic leucine zipper factors (bZIP){1.1}	3.47e-188	2.54e-07	MA0836.2	JASPAR	CEBPD
200	PEAKS039773	CEBPE	ENSMUSG00000052435	Basic domains{1}	Basic leucine zipper factors (bZIP){1.1}	7.87e-201	1.79e-07	MA0836.2	JASPAR	CEBPD
201	PEAKS050665	CLOCK	ENSMUSG00000029238	Basic domains{1}	Basic helix-loop-helix factors (bHLH){1.2}	1.97e-300	5.69e-07	MA1464.1	JASPAR	ARNT2
202	PEAKS050666	CLOCK	ENSMUSG00000029238	Basic domains{1}	Basic helix-loop-helix factors (bHLH){1.2}	8.85e-282	5.18e-07	MA1464.1	JASPAR	ARNT2
203	PEAKS050667	CLOCK	ENSMUSG00000029238	Basic domains{1}	Basic helix-loop-helix factors (bHLH){1.2}	1.13e-234	3.68e-07	MA1464.1	JASPAR	ARNT2
204	PEAKS050668	CLOCK	ENSMUSG00000029238	Basic domains{1}	Basic helix-loop-helix factors (bHLH){1.2}	1.47e-257	3.92e-07	MA1464.1	JASPAR	ARNT2
205	PEAKS050673	CLOCK	ENSMUSG00000029238	Basic domains{1}	Basic helix-loop-helix factors (bHLH){1.2}	7.66e-247	4.53e-07	MA1464.1	JASPAR	ARNT2
206	PEAKS050675	CLOCK	ENSMUSG00000029238	Basic domains{1}	Basic helix-loop-helix factors (bHLH){1.2}	1.9e-244	5.25e-07	MA1464.1	JASPAR	ARNT2
207	PEAKS050677	CLOCK	ENSMUSG00000029238	Basic domains{1}	Basic helix-loop-helix factors (bHLH){1.2}	2.48e-171	8.33e-07	MA0603.1	JASPAR	ARNTL
208	PEAKS050679	CLOCK	ENSMUSG00000029238	Basic domains{1}	Basic helix-loop-helix factors (bHLH){1.2}	1.57e-200	7.53e-07	MA1464.1	JASPAR	ARNT2
209	PEAKS040020	CREB1	ENSMUSG00000025958	Basic domains{1}	Basic leucine zipper factors (bZIP){1.1}	0	2.33e-06	MA0604.1	JASPAR	ATF1
210	PEAKS040021	CREB1	ENSMUSG00000025958	Basic domains{1}	Basic leucine zipper factors (bZIP){1.1}	0	4.12e-08	MA0609.2	JASPAR	CREM
211	PEAKS040022	CREB1	ENSMUSG00000025958	Basic domains{1}	Basic leucine zipper factors (bZIP){1.1}	0	3.82e-07	MA0604.1	JASPAR	ATF1
212	PEAKS040998	CREB1	ENSMUSG00000025958	Basic domains{1}	Basic leucine zipper factors (bZIP){1.1}	3.71e-218	1.96e-10	MA1475.1	JASPAR	CREB3L4
213	PEAKS040999	CREB1	ENSMUSG00000025958	Basic domains{1}	Basic leucine zipper factors (bZIP){1.1}	0	1.59e-11	MA1475.1	JASPAR	CREB3L4
214	PEAKS041000	CREB1	ENSMUSG00000025958	Basic domains{1}	Basic leucine zipper factors (bZIP){1.1}	0	5.8e-12	MA0609.2	JASPAR	CREM
215	PEAKS041001	CREB1	ENSMUSG00000025958	Basic domains{1}	Basic leucine zipper factors (bZIP){1.1}	0	1.46e-11	MA0609.2	JASPAR	CREM
216	PEAKS041002	CREB1	ENSMUSG00000025958	Basic domains{1}	Basic leucine zipper factors (bZIP){1.1}	0	4.14e-07	MA0604.1	JASPAR	ATF1
217	PEAKS055998	CREB1	ENSMUSG00000025958	Basic domains{1}	Basic leucine zipper factors (bZIP){1.1}	0	5.49e-07	MA0604.1	JASPAR	ATF1
218	PEAKS055999	CREB1	ENSMUSG00000025958	Basic domains{1}	Basic leucine zipper factors (bZIP){1.1}	0	1.43e-06	MA1475.1	JASPAR	CREB3L4
219	PEAKS056002	CREB1	ENSMUSG00000025958	Basic domains{1}	Basic leucine zipper factors (bZIP){1.1}	0	2.84e-13	MA0609.2	JASPAR	CREM
220	PEAKS056003	CREB1	ENSMUSG00000025958	Basic domains{1}	Basic leucine zipper factors (bZIP){1.1}	0	6.04e-08	MA0609.2	JASPAR	CREM
221	PEAKS035310	CRX	ENSMUSG00000041578	Helix-turn-helix domains{3}	Homeo domain factors{3.1}	1.54e-252	8.8e-08	MA0883.1	JASPAR	DMBX1
222	PEAKS035311	CRX	ENSMUSG00000041578	Helix-turn-helix domains{3}	Homeo domain factors{3.1}	4.49e-303	2.13e-08	MA0883.1	JASPAR	DMBX1
223	PEAKS035258	CTCF	ENSMUSG00000005698	Zinc-coordinating DNA-binding domains{2}	C2H2 zinc finger factors{2.3}	0	5.92e-17	MA0139.1	JASPAR	CTCF
224	PEAKS035465	CTCF	ENSMUSG00000005698	Zinc-coordinating DNA-binding domains{2}	C2H2 zinc finger factors{2.3}	0	3.09e-21	MA0139.1	JASPAR	CTCF
225	PEAKS035471	CTCF	ENSMUSG00000005698	Zinc-coordinating DNA-binding domains{2}	C2H2 zinc finger factors{2.3}	0	5.17e-22	MA1930.1	JASPAR	CTCF
226	PEAKS035472	CTCF	ENSMUSG00000005698	Zinc-coordinating DNA-binding domains{2}	C2H2 zinc finger factors{2.3}	0	1.56e-23	MA1930.1	JASPAR	CTCF
227	PEAKS035477	CTCF	ENSMUSG00000005698	Zinc-coordinating DNA-binding domains{2}	C2H2 zinc finger factors{2.3}	0	1.98e-20	MA0139.1	JASPAR	CTCF
228	PEAKS035479	CTCF	ENSMUSG00000005698	Zinc-coordinating DNA-binding domains{2}	C2H2 zinc finger factors{2.3}	0	7.42e-20	MA1930.1	JASPAR	CTCF
229	PEAKS035480	CTCF	ENSMUSG00000005698	Zinc-coordinating DNA-binding domains{2}	C2H2 zinc finger factors{2.3}	0	1.03e-22	MA1930.1	JASPAR	CTCF
230	PEAKS035487	CTCF	ENSMUSG00000005698	Zinc-coordinating DNA-binding domains{2}	C2H2 zinc finger factors{2.3}	0	9.02e-22	MA1929.1	JASPAR	CTCF
231	PEAKS035492	CTCF	ENSMUSG00000005698	Zinc-coordinating DNA-binding domains{2}	C2H2 zinc finger factors{2.3}	0	3.22e-17	MA0139.1	JASPAR	CTCF
232	PEAKS035498	CTCF	ENSMUSG00000005698	Zinc-coordinating DNA-binding domains{2}	C2H2 zinc finger factors{2.3}	0	1.6e-19	MA1930.1	JASPAR	CTCF
233	PEAKS035504	CTCF	ENSMUSG00000005698	Zinc-coordinating DNA-binding domains{2}	C2H2 zinc finger factors{2.3}	0	1.05e-16	MA0139.1	JASPAR	CTCF
234	PEAKS035507	CTCF	ENSMUSG00000005698	Zinc-coordinating DNA-binding domains{2}	C2H2 zinc finger factors{2.3}	0	5.53e-20	MA0139.1	JASPAR	CTCF
235	PEAKS035519	CTCF	ENSMUSG00000005698	Zinc-coordinating DNA-binding domains{2}	C2H2 zinc finger factors{2.3}	0	3.31e-17	MA0139.1	JASPAR	CTCF
236	PEAKS035523	CTCF	ENSMUSG00000005698	Zinc-coordinating DNA-binding domains{2}	C2H2 zinc finger factors{2.3}	0	8.59e-17	MA0139.1	JASPAR	CTCF
237	PEAKS035524	CTCF	ENSMUSG00000005698	Zinc-coordinating DNA-binding domains{2}	C2H2 zinc finger factors{2.3}	0	1.01e-17	MA0139.1	JASPAR	CTCF
238	PEAKS035526	CTCF	ENSMUSG00000005698	Zinc-coordinating DNA-binding domains{2}	C2H2 zinc finger factors{2.3}	0	1.05e-18	MA0139.1	JASPAR	CTCF
239	PEAKS035567	CTCF	ENSMUSG00000005698	Zinc-coordinating DNA-binding domains{2}	C2H2 zinc finger factors{2.3}	0	7.43e-21	MA0139.1	JASPAR	CTCF
240	PEAKS035573	CTCF	ENSMUSG00000005698	Zinc-coordinating DNA-binding domains{2}	C2H2 zinc finger factors{2.3}	0	3.7e-19	MA0139.1	JASPAR	CTCF
241	PEAKS035725	CTCF	ENSMUSG00000005698	Zinc-coordinating DNA-binding domains{2}	C2H2 zinc finger factors{2.3}	0	3.6e-25	MA1930.1	JASPAR	CTCF
242	PEAKS035726	CTCF	ENSMUSG00000005698	Zinc-coordinating DNA-binding domains{2}	C2H2 zinc finger factors{2.3}	0	3.46e-19	MA0139.1	JASPAR	CTCF
243	PEAKS035727	CTCF	ENSMUSG00000005698	Zinc-coordinating DNA-binding domains{2}	C2H2 zinc finger factors{2.3}	0	6.86e-24	MA1930.1	JASPAR	CTCF
244	PEAKS035728	CTCF	ENSMUSG00000005698	Zinc-coordinating DNA-binding domains{2}	C2H2 zinc finger factors{2.3}	0	1.22e-20	MA0139.1	JASPAR	CTCF
245	PEAKS035729	CTCF	ENSMUSG00000005698	Zinc-coordinating DNA-binding domains{2}	C2H2 zinc finger factors{2.3}	0	3.63e-17	MA0139.1	JASPAR	CTCF
246	PEAKS035730	CTCF	ENSMUSG00000005698	Zinc-coordinating DNA-binding domains{2}	C2H2 zinc finger factors{2.3}	0	3.96e-18	MA0139.1	JASPAR	CTCF
247	PEAKS035731	CTCF	ENSMUSG00000005698	Zinc-coordinating DNA-binding domains{2}	C2H2 zinc finger factors{2.3}	0	7.16e-20	MA0139.1	JASPAR	CTCF
248	PEAKS035732	CTCF	ENSMUSG00000005698	Zinc-coordinating DNA-binding domains{2}	C2H2 zinc finger factors{2.3}	0	2.78e-21	MA1930.1	JASPAR	CTCF
249	PEAKS035739	CTCF	ENSMUSG00000005698	Zinc-coordinating DNA-binding domains{2}	C2H2 zinc finger factors{2.3}	0	7.42e-23	MA1930.1	JASPAR	CTCF
250	PEAKS035740	CTCF	ENSMUSG00000005698	Zinc-coordinating DNA-binding domains{2}	C2H2 zinc finger factors{2.3}	0	9.6e-22	MA1929.1	JASPAR	CTCF
251	PEAKS035741	CTCF	ENSMUSG00000005698	Zinc-coordinating DNA-binding domains{2}	C2H2 zinc finger factors{2.3}	0	2.01e-20	MA1930.1	JASPAR	CTCF
252	PEAKS035742	CTCF	ENSMUSG00000005698	Zinc-coordinating DNA-binding domains{2}	C2H2 zinc finger factors{2.3}	0	2.54e-23	MA1930.1	JASPAR	CTCF
253	PEAKS035743	CTCF	ENSMUSG00000005698	Zinc-coordinating DNA-binding domains{2}	C2H2 zinc finger factors{2.3}	0	5.15e-20	MA1929.1	JASPAR	CTCF
254	PEAKS035848	CTCF	ENSMUSG00000005698	Zinc-coordinating DNA-binding domains{2}	C2H2 zinc finger factors{2.3}	0	2.93e-17	MA0139.1	JASPAR	CTCF
255	PEAKS035849	CTCF	ENSMUSG00000005698	Zinc-coordinating DNA-binding domains{2}	C2H2 zinc finger factors{2.3}	0	1.59e-22	MA0139.1	JASPAR	CTCF
256	PEAKS035850	CTCF	ENSMUSG00000005698	Zinc-coordinating DNA-binding domains{2}	C2H2 zinc finger factors{2.3}	0	3.49e-24	MA1930.1	JASPAR	CTCF
257	PEAKS035851	CTCF	ENSMUSG00000005698	Zinc-coordinating DNA-binding domains{2}	C2H2 zinc finger factors{2.3}	0	4.61e-24	MA1930.1	JASPAR	CTCF
258	PEAKS036060	CTCF	ENSMUSG00000005698	Zinc-coordinating DNA-binding domains{2}	C2H2 zinc finger factors{2.3}	0	1.29e-21	MA1930.1	JASPAR	CTCF
259	PEAKS036061	CTCF	ENSMUSG00000005698	Zinc-coordinating DNA-binding domains{2}	C2H2 zinc finger factors{2.3}	0	3.57e-18	MA0139.1	JASPAR	CTCF
260	PEAKS036106	CTCF	ENSMUSG00000005698	Zinc-coordinating DNA-binding domains{2}	C2H2 zinc finger factors{2.3}	0	2.89e-24	MA1930.1	JASPAR	CTCF
261	PEAKS036107	CTCF	ENSMUSG00000005698	Zinc-coordinating DNA-binding domains{2}	C2H2 zinc finger factors{2.3}	0	2.13e-24	MA1929.1	JASPAR	CTCF
262	PEAKS036174	CTCF	ENSMUSG00000005698	Zinc-coordinating DNA-binding domains{2}	C2H2 zinc finger factors{2.3}	0	4.87e-25	MA0139.1	JASPAR	CTCF
263	PEAKS036175	CTCF	ENSMUSG00000005698	Zinc-coordinating DNA-binding domains{2}	C2H2 zinc finger factors{2.3}	0	4.77e-23	MA1930.1	JASPAR	CTCF
264	PEAKS036271	CTCF	ENSMUSG00000005698	Zinc-coordinating DNA-binding domains{2}	C2H2 zinc finger factors{2.3}	0	1.86e-24	MA1929.1	JASPAR	CTCF
265	PEAKS037162	CTCF	ENSMUSG00000005698	Zinc-coordinating DNA-binding domains{2}	C2H2 zinc finger factors{2.3}	0	1.79e-18	MA0139.1	JASPAR	CTCF
266	PEAKS037163	CTCF	ENSMUSG00000005698	Zinc-coordinating DNA-binding domains{2}	C2H2 zinc finger factors{2.3}	0	1.38e-17	MA0139.1	JASPAR	CTCF
267	PEAKS037944	CTCF	ENSMUSG00000005698	Zinc-coordinating DNA-binding domains{2}	C2H2 zinc finger factors{2.3}	0	5.56e-25	MA1930.1	JASPAR	CTCF
268	PEAKS037945	CTCF	ENSMUSG00000005698	Zinc-coordinating DNA-binding domains{2}	C2H2 zinc finger factors{2.3}	0	9.61e-26	MA1930.1	JASPAR	CTCF
269	PEAKS038306	CTCF	ENSMUSG00000005698	Zinc-coordinating DNA-binding domains{2}	C2H2 zinc finger factors{2.3}	0	4.67e-18	MA0139.1	JASPAR	CTCF
270	PEAKS039799	CTCF	ENSMUSG00000005698	Zinc-coordinating DNA-binding domains{2}	C2H2 zinc finger factors{2.3}	0	3.53e-20	MA0139.1	JASPAR	CTCF
271	PEAKS039800	CTCF	ENSMUSG00000005698	Zinc-coordinating DNA-binding domains{2}	C2H2 zinc finger factors{2.3}	0	3.07e-17	MA0139.1	JASPAR	CTCF
272	PEAKS039801	CTCF	ENSMUSG00000005698	Zinc-coordinating DNA-binding domains{2}	C2H2 zinc finger factors{2.3}	0	2.33e-24	MA1930.1	JASPAR	CTCF
273	PEAKS039802	CTCF	ENSMUSG00000005698	Zinc-coordinating DNA-binding domains{2}	C2H2 zinc finger factors{2.3}	0	4.83e-19	MA0139.1	JASPAR	CTCF
274	PEAKS039850	CTCF	ENSMUSG00000005698	Zinc-coordinating DNA-binding domains{2}	C2H2 zinc finger factors{2.3}	0	4.32e-16	MA0139.1	JASPAR	CTCF
275	PEAKS039852	CTCF	ENSMUSG00000005698	Zinc-coordinating DNA-binding domains{2}	C2H2 zinc finger factors{2.3}	0	7.65e-19	MA0139.1	JASPAR	CTCF
276	PEAKS039854	CTCF	ENSMUSG00000005698	Zinc-coordinating DNA-binding domains{2}	C2H2 zinc finger factors{2.3}	0	1.1e-15	MA1929.1	JASPAR	CTCF
277	PEAKS039856	CTCF	ENSMUSG00000005698	Zinc-coordinating DNA-binding domains{2}	C2H2 zinc finger factors{2.3}	0	2.91e-18	MA0139.1	JASPAR	CTCF
278	PEAKS039915	CTCF	ENSMUSG00000005698	Zinc-coordinating DNA-binding domains{2}	C2H2 zinc finger factors{2.3}	0	1.91e-24	MA1930.1	JASPAR	CTCF
279	PEAKS040140	CTCF	ENSMUSG00000005698	Zinc-coordinating DNA-binding domains{2}	C2H2 zinc finger factors{2.3}	8.43e-265	6.19e-18	MA1929.1	JASPAR	CTCF
280	PEAKS040325	CTCF	ENSMUSG00000005698	Zinc-coordinating DNA-binding domains{2}	C2H2 zinc finger factors{2.3}	0	3.08e-15	MA0139.1	JASPAR	CTCF
281	PEAKS040331	CTCF	ENSMUSG00000005698	Zinc-coordinating DNA-binding domains{2}	C2H2 zinc finger factors{2.3}	0	2.2e-23	MA1930.1	JASPAR	CTCF
282	PEAKS040332	CTCF	ENSMUSG00000005698	Zinc-coordinating DNA-binding domains{2}	C2H2 zinc finger factors{2.3}	0	1.5e-24	MA0139.1	JASPAR	CTCF
283	PEAKS040337	CTCF	ENSMUSG00000005698	Zinc-coordinating DNA-binding domains{2}	C2H2 zinc finger factors{2.3}	0	4.36e-16	MA1929.1	JASPAR	CTCF
284	PEAKS040338	CTCF	ENSMUSG00000005698	Zinc-coordinating DNA-binding domains{2}	C2H2 zinc finger factors{2.3}	0	1.26e-18	MA0139.1	JASPAR	CTCF
285	PEAKS040339	CTCF	ENSMUSG00000005698	Zinc-coordinating DNA-binding domains{2}	C2H2 zinc finger factors{2.3}	0	7.21e-17	MA0139.1	JASPAR	CTCF
286	PEAKS040340	CTCF	ENSMUSG00000005698	Zinc-coordinating DNA-binding domains{2}	C2H2 zinc finger factors{2.3}	1.15e-14	0.00293	MA1721.1	JASPAR	ZNF93
287	PEAKS040341	CTCF	ENSMUSG00000005698	Zinc-coordinating DNA-binding domains{2}	C2H2 zinc finger factors{2.3}	0	1.28e-21	MA1929.1	JASPAR	CTCF
288	PEAKS040342	CTCF	ENSMUSG00000005698	Zinc-coordinating DNA-binding domains{2}	C2H2 zinc finger factors{2.3}	0	5.65e-23	MA1930.1	JASPAR	CTCF
289	PEAKS040412	CTCF	ENSMUSG00000005698	Zinc-coordinating DNA-binding domains{2}	C2H2 zinc finger factors{2.3}	0	4.8e-19	MA0139.1	JASPAR	CTCF
290	PEAKS040413	CTCF	ENSMUSG00000005698	Zinc-coordinating DNA-binding domains{2}	C2H2 zinc finger factors{2.3}	0	3.93e-26	MA1930.1	JASPAR	CTCF
291	PEAKS040414	CTCF	ENSMUSG00000005698	Zinc-coordinating DNA-binding domains{2}	C2H2 zinc finger factors{2.3}	0	8.09e-22	MA0139.1	JASPAR	CTCF
292	PEAKS040666	CTCF	ENSMUSG00000005698	Zinc-coordinating DNA-binding domains{2}	C2H2 zinc finger factors{2.3}	0	1.52e-20	MA0139.1	JASPAR	CTCF
293	PEAKS040667	CTCF	ENSMUSG00000005698	Zinc-coordinating DNA-binding domains{2}	C2H2 zinc finger factors{2.3}	0	3.8e-24	MA1930.1	JASPAR	CTCF
294	PEAKS040940	CTCF	ENSMUSG00000005698	Zinc-coordinating DNA-binding domains{2}	C2H2 zinc finger factors{2.3}	0	7.04e-19	MA0139.1	JASPAR	CTCF
295	PEAKS040941	CTCF	ENSMUSG00000005698	Zinc-coordinating DNA-binding domains{2}	C2H2 zinc finger factors{2.3}	0	7.22e-19	MA0139.1	JASPAR	CTCF
296	PEAKS040942	CTCF	ENSMUSG00000005698	Zinc-coordinating DNA-binding domains{2}	C2H2 zinc finger factors{2.3}	0	7.39e-21	MA0139.1	JASPAR	CTCF
297	PEAKS040943	CTCF	ENSMUSG00000005698	Zinc-coordinating DNA-binding domains{2}	C2H2 zinc finger factors{2.3}	0	1.13e-16	MA0139.1	JASPAR	CTCF
298	PEAKS040944	CTCF	ENSMUSG00000005698	Zinc-coordinating DNA-binding domains{2}	C2H2 zinc finger factors{2.3}	0	7.37e-19	MA0139.1	JASPAR	CTCF
299	PEAKS040945	CTCF	ENSMUSG00000005698	Zinc-coordinating DNA-binding domains{2}	C2H2 zinc finger factors{2.3}	0	4.64e-20	MA0139.1	JASPAR	CTCF
300	PEAKS040946	CTCF	ENSMUSG00000005698	Zinc-coordinating DNA-binding domains{2}	C2H2 zinc finger factors{2.3}	0	1.92e-20	MA0139.1	JASPAR	CTCF
301	PEAKS040947	CTCF	ENSMUSG00000005698	Zinc-coordinating DNA-binding domains{2}	C2H2 zinc finger factors{2.3}	0	4.12e-20	MA0139.1	JASPAR	CTCF
302	PEAKS041060	CTCF	ENSMUSG00000005698	Zinc-coordinating DNA-binding domains{2}	C2H2 zinc finger factors{2.3}	0	8.33e-23	MA1929.1	JASPAR	CTCF
303	PEAKS041061	CTCF	ENSMUSG00000005698	Zinc-coordinating DNA-binding domains{2}	C2H2 zinc finger factors{2.3}	0	2.45e-21	MA1930.1	JASPAR	CTCF
304	PEAKS041062	CTCF	ENSMUSG00000005698	Zinc-coordinating DNA-binding domains{2}	C2H2 zinc finger factors{2.3}	0	1.44e-17	MA0139.1	JASPAR	CTCF
305	PEAKS041063	CTCF	ENSMUSG00000005698	Zinc-coordinating DNA-binding domains{2}	C2H2 zinc finger factors{2.3}	0	4.66e-16	MA0139.1	JASPAR	CTCF
306	PEAKS041198	CTCF	ENSMUSG00000005698	Zinc-coordinating DNA-binding domains{2}	C2H2 zinc finger factors{2.3}	0	1.25e-20	MA0139.1	JASPAR	CTCF
307	PEAKS041243	CTCF	ENSMUSG00000005698	Zinc-coordinating DNA-binding domains{2}	C2H2 zinc finger factors{2.3}	0	2.44e-25	MA0139.1	JASPAR	CTCF
308	PEAKS041379	CTCF	ENSMUSG00000005698	Zinc-coordinating DNA-binding domains{2}	C2H2 zinc finger factors{2.3}	0	1.76e-19	MA0139.1	JASPAR	CTCF
309	PEAKS041389	CTCF	ENSMUSG00000005698	Zinc-coordinating DNA-binding domains{2}	C2H2 zinc finger factors{2.3}	0	1.57e-21	MA0139.1	JASPAR	CTCF
310	PEAKS041458	CTCF	ENSMUSG00000005698	Zinc-coordinating DNA-binding domains{2}	C2H2 zinc finger factors{2.3}	0	1.96e-24	MA1930.1	JASPAR	CTCF
311	PEAKS041574	CTCF	ENSMUSG00000005698	Zinc-coordinating DNA-binding domains{2}	C2H2 zinc finger factors{2.3}	0	1.07e-21	MA0139.1	JASPAR	CTCF
312	PEAKS041577	CTCF	ENSMUSG00000005698	Zinc-coordinating DNA-binding domains{2}	C2H2 zinc finger factors{2.3}	0	1.31e-23	MA1930.1	JASPAR	CTCF
313	PEAKS041630	CTCF	ENSMUSG00000005698	Zinc-coordinating DNA-binding domains{2}	C2H2 zinc finger factors{2.3}	0	1.03e-20	MA0139.1	JASPAR	CTCF
314	PEAKS041724	CTCF	ENSMUSG00000005698	Zinc-coordinating DNA-binding domains{2}	C2H2 zinc finger factors{2.3}	0	2e-21	MA0139.1	JASPAR	CTCF
315	PEAKS041853	CTCF	ENSMUSG00000005698	Zinc-coordinating DNA-binding domains{2}	C2H2 zinc finger factors{2.3}	0	3.16e-24	MA1929.1	JASPAR	CTCF
316	PEAKS041854	CTCF	ENSMUSG00000005698	Zinc-coordinating DNA-binding domains{2}	C2H2 zinc finger factors{2.3}	0	1.81e-19	MA0139.1	JASPAR	CTCF
317	PEAKS048309	CTCF	ENSMUSG00000005698	Zinc-coordinating DNA-binding domains{2}	C2H2 zinc finger factors{2.3}	0	2.79e-19	MA0139.1	JASPAR	CTCF
318	PEAKS048714	CTCF	ENSMUSG00000005698	Zinc-coordinating DNA-binding domains{2}	C2H2 zinc finger factors{2.3}	0	1.93e-21	MA1929.1	JASPAR	CTCF
319	PEAKS048715	CTCF	ENSMUSG00000005698	Zinc-coordinating DNA-binding domains{2}	C2H2 zinc finger factors{2.3}	0	1.63e-20	MA1929.1	JASPAR	CTCF
320	PEAKS048768	CTCF	ENSMUSG00000005698	Zinc-coordinating DNA-binding domains{2}	C2H2 zinc finger factors{2.3}	0	2.07e-22	MA1929.1	JASPAR	CTCF
321	PEAKS048769	CTCF	ENSMUSG00000005698	Zinc-coordinating DNA-binding domains{2}	C2H2 zinc finger factors{2.3}	0	1.21e-20	MA0139.1	JASPAR	CTCF
322	PEAKS048774	CTCF	ENSMUSG00000005698	Zinc-coordinating DNA-binding domains{2}	C2H2 zinc finger factors{2.3}	0	1.1e-23	MA1930.1	JASPAR	CTCF
323	PEAKS048775	CTCF	ENSMUSG00000005698	Zinc-coordinating DNA-binding domains{2}	C2H2 zinc finger factors{2.3}	0	3.8e-19	MA0139.1	JASPAR	CTCF
324	PEAKS049377	CTCF	ENSMUSG00000005698	Zinc-coordinating DNA-binding domains{2}	C2H2 zinc finger factors{2.3}	0	1.07e-23	MA1930.1	JASPAR	CTCF
325	PEAKS049619	CTCF	ENSMUSG00000005698	Zinc-coordinating DNA-binding domains{2}	C2H2 zinc finger factors{2.3}	0	2.5e-25	MA1930.1	JASPAR	CTCF
326	PEAKS049620	CTCF	ENSMUSG00000005698	Zinc-coordinating DNA-binding domains{2}	C2H2 zinc finger factors{2.3}	0	3.54e-18	MA0139.1	JASPAR	CTCF
327	PEAKS049635	CTCF	ENSMUSG00000005698	Zinc-coordinating DNA-binding domains{2}	C2H2 zinc finger factors{2.3}	0	1.66e-21	MA0139.1	JASPAR	CTCF
328	PEAKS049636	CTCF	ENSMUSG00000005698	Zinc-coordinating DNA-binding domains{2}	C2H2 zinc finger factors{2.3}	0	2.83e-16	MA0139.1	JASPAR	CTCF
329	PEAKS049637	CTCF	ENSMUSG00000005698	Zinc-coordinating DNA-binding domains{2}	C2H2 zinc finger factors{2.3}	0	4.42e-20	MA0139.1	JASPAR	CTCF
330	PEAKS049638	CTCF	ENSMUSG00000005698	Zinc-coordinating DNA-binding domains{2}	C2H2 zinc finger factors{2.3}	0	3.32e-25	MA1930.1	JASPAR	CTCF
331	PEAKS049816	CTCF	ENSMUSG00000005698	Zinc-coordinating DNA-binding domains{2}	C2H2 zinc finger factors{2.3}	0	8e-18	MA0139.1	JASPAR	CTCF
332	PEAKS049817	CTCF	ENSMUSG00000005698	Zinc-coordinating DNA-binding domains{2}	C2H2 zinc finger factors{2.3}	0	7.15e-22	MA0139.1	JASPAR	CTCF
333	PEAKS049828	CTCF	ENSMUSG00000005698	Zinc-coordinating DNA-binding domains{2}	C2H2 zinc finger factors{2.3}	0	3.15e-19	MA1930.1	JASPAR	CTCF
334	PEAKS049829	CTCF	ENSMUSG00000005698	Zinc-coordinating DNA-binding domains{2}	C2H2 zinc finger factors{2.3}	0	4.94e-24	MA1930.1	JASPAR	CTCF
335	PEAKS052297	CTCF	ENSMUSG00000005698	Zinc-coordinating DNA-binding domains{2}	C2H2 zinc finger factors{2.3}	0	3.04e-17	MA0139.1	JASPAR	CTCF
336	PEAKS052604	CTCF	ENSMUSG00000005698	Zinc-coordinating DNA-binding domains{2}	C2H2 zinc finger factors{2.3}	0	1.19e-17	MA0139.1	JASPAR	CTCF
337	PEAKS054477	CTCF	ENSMUSG00000005698	Zinc-coordinating DNA-binding domains{2}	C2H2 zinc finger factors{2.3}	0	3.28e-14	MA0139.1	JASPAR	CTCF
338	PEAKS054478	CTCF	ENSMUSG00000005698	Zinc-coordinating DNA-binding domains{2}	C2H2 zinc finger factors{2.3}	0	4.67e-21	MA1929.1	JASPAR	CTCF
339	PEAKS054796	CTCF	ENSMUSG00000005698	Zinc-coordinating DNA-binding domains{2}	C2H2 zinc finger factors{2.3}	0	2.68e-23	MA1930.1	JASPAR	CTCF
340	PEAKS054797	CTCF	ENSMUSG00000005698	Zinc-coordinating DNA-binding domains{2}	C2H2 zinc finger factors{2.3}	0	1.09e-20	MA1929.1	JASPAR	CTCF
341	PEAKS055636	CTCF	ENSMUSG00000005698	Zinc-coordinating DNA-binding domains{2}	C2H2 zinc finger factors{2.3}	0	1.54e-24	MA0139.1	JASPAR	CTCF
342	PEAKS055637	CTCF	ENSMUSG00000005698	Zinc-coordinating DNA-binding domains{2}	C2H2 zinc finger factors{2.3}	0	2.13e-21	MA1930.1	JASPAR	CTCF
343	PEAKS057534	CTCF	ENSMUSG00000005698	Zinc-coordinating DNA-binding domains{2}	C2H2 zinc finger factors{2.3}	0	1.94e-19	MA0139.1	JASPAR	CTCF
344	PEAKS057535	CTCF	ENSMUSG00000005698	Zinc-coordinating DNA-binding domains{2}	C2H2 zinc finger factors{2.3}	0	4.05e-20	MA0139.1	JASPAR	CTCF
345	PEAKS057536	CTCF	ENSMUSG00000005698	Zinc-coordinating DNA-binding domains{2}	C2H2 zinc finger factors{2.3}	0	9.63e-20	MA0139.1	JASPAR	CTCF
346	PEAKS057537	CTCF	ENSMUSG00000005698	Zinc-coordinating DNA-binding domains{2}	C2H2 zinc finger factors{2.3}	0	6.16e-24	MA1930.1	JASPAR	CTCF
347	PEAKS057538	CTCF	ENSMUSG00000005698	Zinc-coordinating DNA-binding domains{2}	C2H2 zinc finger factors{2.3}	0	1.99e-20	MA0139.1	JASPAR	CTCF
348	PEAKS057539	CTCF	ENSMUSG00000005698	Zinc-coordinating DNA-binding domains{2}	C2H2 zinc finger factors{2.3}	0	7.84e-19	MA0139.1	JASPAR	CTCF
349	PEAKS058095	CTCF	ENSMUSG00000005698	Zinc-coordinating DNA-binding domains{2}	C2H2 zinc finger factors{2.3}	0	1.93e-20	MA1930.1	JASPAR	CTCF
350	PEAKS058096	CTCF	ENSMUSG00000005698	Zinc-coordinating DNA-binding domains{2}	C2H2 zinc finger factors{2.3}	0	2.92e-15	MA0139.1	JASPAR	CTCF
351	PEAKS059302	CTCF	ENSMUSG00000005698	Zinc-coordinating DNA-binding domains{2}	C2H2 zinc finger factors{2.3}	0	1.73e-23	MA1930.1	JASPAR	CTCF
352	PEAKS038307	CTCFL	ENSMUSG00000070495	Zinc-coordinating DNA-binding domains{2}	C2H2 zinc finger factors{2.3}	0	7.63e-12	MA0139.1	JASPAR	CTCF
353	PEAKS040452	DLX3	ENSMUSG00000001510	Helix-turn-helix domains{3}	Homeo domain factors{3.1}	3.43e-79	1	#N/A	#N/A	#N/A
354	PEAKS037776	DMRT1	ENSMUSG00000024837	Zinc-coordinating DNA-binding domains{2}	DM-type intertwined zinc finger factors{2.5}	0	4.87e-08	MA1478.1	JASPAR	DMRTA2
355	PEAKS037344	DMRTB1	ENSMUSG00000028610	Zinc-coordinating DNA-binding domains{2}	DM-type intertwined zinc finger factors{2.5}	1	1.1e-08	MA1603.1	JASPAR	DMRT1
356	PEAKS035852	E2F1	ENSMUSG00000027490	Helix-turn-helix domains{3}	Fork head / winged helix factors{3.3}	1.87e-23	5.83e-06	MA1122.1	JASPAR	TFDP1
357	PEAKS035853	E2F1	ENSMUSG00000027490	Helix-turn-helix domains{3}	Fork head / winged helix factors{3.3}	1.22e-06	1	#N/A	#N/A	#N/A
358	PEAKS035854	E2F1	ENSMUSG00000027490	Helix-turn-helix domains{3}	Fork head / winged helix factors{3.3}	3.82e-07	1	#N/A	#N/A	#N/A
359	PEAKS035855	E2F1	ENSMUSG00000027490	Helix-turn-helix domains{3}	Fork head / winged helix factors{3.3}	1.73e-09	1	#N/A	#N/A	#N/A
360	PEAKS038545	E2F1	ENSMUSG00000027490	Helix-turn-helix domains{3}	Fork head / winged helix factors{3.3}	4.42e-201	0.335	MA0864.2	JASPAR	E2F2
361	PEAKS035488	E2F4	ENSMUSG00000014859	Helix-turn-helix domains{3}	Fork head / winged helix factors{3.3}	3.99e-121	0.106	MA0758.1	JASPAR	E2F7
362	PEAKS035856	E2F4	ENSMUSG00000014859	Helix-turn-helix domains{3}	Fork head / winged helix factors{3.3}	1.53e-97	2.9e-05	MA1122.1	JASPAR	TFDP1
363	PEAKS035857	E2F4	ENSMUSG00000014859	Helix-turn-helix domains{3}	Fork head / winged helix factors{3.3}	2.41e-76	0.106	MA0471.2	JASPAR	E2F6
364	PEAKS035858	E2F4	ENSMUSG00000014859	Helix-turn-helix domains{3}	Fork head / winged helix factors{3.3}	9.13e-75	2.03e-06	MA0865.2	JASPAR	E2F8
365	PEAKS035859	E2F4	ENSMUSG00000014859	Helix-turn-helix domains{3}	Fork head / winged helix factors{3.3}	6.91e-85	7.51e-06	MA1122.1	JASPAR	TFDP1
366	PEAKS038834	E2F4	ENSMUSG00000014859	Helix-turn-helix domains{3}	Fork head / winged helix factors{3.3}	1.08e-160	0.0821	MA0758.1	JASPAR	E2F7
367	PEAKS035549	EBF1	ENSMUSG00000057098	Immunoglobulin fold{6}	Rel homology region (RHR) factors{6.1}	5e-224	3.61e-07	MA1604.1	JASPAR	EBF2
368	PEAKS035836	EBF1	ENSMUSG00000057098	Immunoglobulin fold{6}	Rel homology region (RHR) factors{6.1}	0	2.24e-07	MA1604.1	JASPAR	EBF2
369	PEAKS036423	EBF1	ENSMUSG00000057098	Immunoglobulin fold{6}	Rel homology region (RHR) factors{6.1}	0	2.43e-07	MA1604.1	JASPAR	EBF2
370	PEAKS038138	EBF1	ENSMUSG00000057098	Immunoglobulin fold{6}	Rel homology region (RHR) factors{6.1}	0	1.76e-07	MA1604.1	JASPAR	EBF2
371	PEAKS038139	EBF1	ENSMUSG00000057098	Immunoglobulin fold{6}	Rel homology region (RHR) factors{6.1}	0	4.32e-07	MA1604.1	JASPAR	EBF2
372	PEAKS038140	EBF1	ENSMUSG00000057098	Immunoglobulin fold{6}	Rel homology region (RHR) factors{6.1}	0	2.53e-07	MA1604.1	JASPAR	EBF2
373	PEAKS038141	EBF1	ENSMUSG00000057098	Immunoglobulin fold{6}	Rel homology region (RHR) factors{6.1}	0	1.74e-06	MA1604.1	JASPAR	EBF2
374	PEAKS038976	EBF1	ENSMUSG00000057098	Immunoglobulin fold{6}	Rel homology region (RHR) factors{6.1}	0	1.34e-07	MA1604.1	JASPAR	EBF2
375	PEAKS039240	EBF1	ENSMUSG00000057098	Immunoglobulin fold{6}	Rel homology region (RHR) factors{6.1}	0	8.48e-08	MA1604.1	JASPAR	EBF2
376	PEAKS039241	EBF1	ENSMUSG00000057098	Immunoglobulin fold{6}	Rel homology region (RHR) factors{6.1}	0	1.98e-07	MA1604.1	JASPAR	EBF2
377	PEAKS040358	EBF1	ENSMUSG00000057098	Immunoglobulin fold{6}	Rel homology region (RHR) factors{6.1}	0	1.67e-07	MA1604.1	JASPAR	EBF2
378	PEAKS040359	EBF1	ENSMUSG00000057098	Immunoglobulin fold{6}	Rel homology region (RHR) factors{6.1}	0	9.15e-07	MA0154.4	JASPAR	EBF1
379	PEAKS048598	EBF1	ENSMUSG00000057098	Immunoglobulin fold{6}	Rel homology region (RHR) factors{6.1}	0	1.46e-07	MA1604.1	JASPAR	EBF2
380	PEAKS048599	EBF1	ENSMUSG00000057098	Immunoglobulin fold{6}	Rel homology region (RHR) factors{6.1}	0	2.18e-08	MA1604.1	JASPAR	EBF2
381	PEAKS048600	EBF1	ENSMUSG00000057098	Immunoglobulin fold{6}	Rel homology region (RHR) factors{6.1}	0	1.68e-07	MA1637.1	JASPAR	EBF3
382	PEAKS049707	EBF1	ENSMUSG00000057098	Immunoglobulin fold{6}	Rel homology region (RHR) factors{6.1}	1.01e-271	3.42e-07	MA1604.1	JASPAR	EBF2
383	PEAKS049708	EBF1	ENSMUSG00000057098	Immunoglobulin fold{6}	Rel homology region (RHR) factors{6.1}	0	6.45e-07	MA1604.1	JASPAR	EBF2
384	PEAKS049709	EBF1	ENSMUSG00000057098	Immunoglobulin fold{6}	Rel homology region (RHR) factors{6.1}	0	7.1e-07	MA0154.4	JASPAR	EBF1
385	PEAKS049711	EBF1	ENSMUSG00000057098	Immunoglobulin fold{6}	Rel homology region (RHR) factors{6.1}	0	4.37e-07	MA1604.1	JASPAR	EBF2
386	PEAKS039791	EBF2	ENSMUSG00000022053	Immunoglobulin fold{6}	Rel homology region (RHR) factors{6.1}	2.57e-212	1.11e-07	MA1604.1	JASPAR	EBF2
387	PEAKS039792	EBF2	ENSMUSG00000022053	Immunoglobulin fold{6}	Rel homology region (RHR) factors{6.1}	4.39e-262	4.68e-07	MA1604.1	JASPAR	EBF2
388	PEAKS039793	EBF2	ENSMUSG00000022053	Immunoglobulin fold{6}	Rel homology region (RHR) factors{6.1}	2.83e-287	1.83e-07	MA1604.1	JASPAR	EBF2
389	PEAKS039794	EBF2	ENSMUSG00000022053	Immunoglobulin fold{6}	Rel homology region (RHR) factors{6.1}	0	2.3e-07	MA1604.1	JASPAR	EBF2
390	PEAKS035917	EGR1	ENSMUSG00000038418	Zinc-coordinating DNA-binding domains{2}	C2H2 zinc finger factors{2.3}	1.24e-235	1.2e-08	MA0162.4	JASPAR	EGR1
391	PEAKS035919	EGR1	ENSMUSG00000038418	Zinc-coordinating DNA-binding domains{2}	C2H2 zinc finger factors{2.3}	3.09e-284	9.87e-10	MA0162.4	JASPAR	EGR1
392	PEAKS036141	EGR1	ENSMUSG00000038418	Zinc-coordinating DNA-binding domains{2}	C2H2 zinc finger factors{2.3}	4.44e-147	0.395	MA1514.1	JASPAR	KLF17
393	PEAKS057617	EGR1	ENSMUSG00000038418	Zinc-coordinating DNA-binding domains{2}	C2H2 zinc finger factors{2.3}	3.35e-273	8.67e-09	MA0162.4	JASPAR	EGR1
394	PEAKS035876	EGR2	ENSMUSG00000037868	Zinc-coordinating DNA-binding domains{2}	C2H2 zinc finger factors{2.3}	1.14e-259	4.33e-06	MA0162.4	JASPAR	EGR1
395	PEAKS035877	EGR2	ENSMUSG00000037868	Zinc-coordinating DNA-binding domains{2}	C2H2 zinc finger factors{2.3}	1.67e-169	1e-08	MA0162.4	JASPAR	EGR1
396	PEAKS035878	EGR2	ENSMUSG00000037868	Zinc-coordinating DNA-binding domains{2}	C2H2 zinc finger factors{2.3}	1.65e-235	3.2e-06	MA0162.4	JASPAR	EGR1
397	PEAKS035879	EGR2	ENSMUSG00000037868	Zinc-coordinating DNA-binding domains{2}	C2H2 zinc finger factors{2.3}	1.97e-176	2.75e-05	MA0162.4	JASPAR	EGR1
398	PEAKS036233	EGR2	ENSMUSG00000037868	Zinc-coordinating DNA-binding domains{2}	C2H2 zinc finger factors{2.3}	1.46e-265	3.54e-09	MA0162.4	JASPAR	EGR1
399	PEAKS036234	EGR2	ENSMUSG00000037868	Zinc-coordinating DNA-binding domains{2}	C2H2 zinc finger factors{2.3}	2.06e-216	0.00123	MA0162.4	JASPAR	EGR1
400	PEAKS036078	ELF1	ENSMUSG00000036461	Helix-turn-helix domains{3}	Tryptophan cluster factors{3.5}	0	2.49e-10	MA1483.2	JASPAR	ELF2
401	PEAKS036079	ELF1	ENSMUSG00000036461	Helix-turn-helix domains{3}	Tryptophan cluster factors{3.5}	0	1.55e-10	MA1483.2	JASPAR	ELF2
402	PEAKS040401	ELF1	ENSMUSG00000036461	Helix-turn-helix domains{3}	Tryptophan cluster factors{3.5}	0	8.8e-12	MA0076.2	JASPAR	ELK4
403	PEAKS040402	ELF4	ENSMUSG00000031103	Helix-turn-helix domains{3}	Tryptophan cluster factors{3.5}	0	4.06e-11	MA0076.2	JASPAR	ELK4
404	PEAKS040403	ELF4	ENSMUSG00000031103	Helix-turn-helix domains{3}	Tryptophan cluster factors{3.5}	0	1.18e-10	MA1483.2	JASPAR	ELF2
405	PEAKS040404	ELF4	ENSMUSG00000031103	Helix-turn-helix domains{3}	Tryptophan cluster factors{3.5}	0	2.69e-11	MA0473.3	JASPAR	ELF1
406	PEAKS050743	EOMES	ENSMUSG00000032446	Immunoglobulin fold{6}	T-Box factors{6.5}	4.89e-108	0.699	MA0802.1	JASPAR	TBR1
407	PEAKS053270	ERF	ENSMUSG00000040857	Helix-turn-helix domains{3}	Tryptophan cluster factors{3.5}	8.62e-108	0.545	MA0080.6	JASPAR	SPI1
408	PEAKS053271	ERF	ENSMUSG00000040857	Helix-turn-helix domains{3}	Tryptophan cluster factors{3.5}	1.14e-115	1.03e-07	MA0764.3	JASPAR	ETV4
409	PEAKS053272	ERF	ENSMUSG00000040857	Helix-turn-helix domains{3}	Tryptophan cluster factors{3.5}	9.16e-102	0.523	MA0080.6	JASPAR	SPI1
410	PEAKS053273	ERF	ENSMUSG00000040857	Helix-turn-helix domains{3}	Tryptophan cluster factors{3.5}	1.1e-86	0.705	MA0080.6	JASPAR	SPI1
411	PEAKS035587	ERG	ENSMUSG00000040732	Helix-turn-helix domains{3}	Tryptophan cluster factors{3.5}	0	3.91e-12	MA0076.2	JASPAR	ELK4
412	PEAKS035589	ERG	ENSMUSG00000040732	Helix-turn-helix domains{3}	Tryptophan cluster factors{3.5}	0	2.7e-10	MA0764.3	JASPAR	ETV4
413	PEAKS035661	ERG	ENSMUSG00000040732	Helix-turn-helix domains{3}	Tryptophan cluster factors{3.5}	0	1.73e-11	MA0076.2	JASPAR	ELK4
414	PEAKS035662	ERG	ENSMUSG00000040732	Helix-turn-helix domains{3}	Tryptophan cluster factors{3.5}	0	7.09e-12	MA0076.2	JASPAR	ELK4
415	PEAKS035603	ESR1	ENSMUSG00000019768	Zinc-coordinating DNA-binding domains{2}	Nuclear receptors with C4 zinc fingers{2.1}	2.26e-61	1	#N/A	#N/A	#N/A
416	PEAKS035604	ESR1	ENSMUSG00000019768	Zinc-coordinating DNA-binding domains{2}	Nuclear receptors with C4 zinc fingers{2.1}	0	2.16e-13	MA0258.2	JASPAR	ESR2
417	PEAKS035948	ESR1	ENSMUSG00000019768	Zinc-coordinating DNA-binding domains{2}	Nuclear receptors with C4 zinc fingers{2.1}	0	7.5e-13	MA0112.3	JASPAR	ESR1
418	PEAKS035949	ESR1	ENSMUSG00000019768	Zinc-coordinating DNA-binding domains{2}	Nuclear receptors with C4 zinc fingers{2.1}	0	1.13e-13	MA0258.2	JASPAR	ESR2
419	PEAKS036166	ESR1	ENSMUSG00000019768	Zinc-coordinating DNA-binding domains{2}	Nuclear receptors with C4 zinc fingers{2.1}	0	1.35e-12	MA0112.3	JASPAR	ESR1
420	PEAKS036219	ESR1	ENSMUSG00000019768	Zinc-coordinating DNA-binding domains{2}	Nuclear receptors with C4 zinc fingers{2.1}	0	5.4e-14	MA0258.2	JASPAR	ESR2
421	PEAKS036220	ESR1	ENSMUSG00000019768	Zinc-coordinating DNA-binding domains{2}	Nuclear receptors with C4 zinc fingers{2.1}	0	1.35e-14	MA0258.2	JASPAR	ESR2
422	PEAKS036221	ESR1	ENSMUSG00000019768	Zinc-coordinating DNA-binding domains{2}	Nuclear receptors with C4 zinc fingers{2.1}	2.42e-62	1	#N/A	#N/A	#N/A
423	PEAKS036222	ESR1	ENSMUSG00000019768	Zinc-coordinating DNA-binding domains{2}	Nuclear receptors with C4 zinc fingers{2.1}	5.13e-126	1.78e-08	MA0113.3	JASPAR	NR3C1
424	PEAKS036566	ESR1	ENSMUSG00000019768	Zinc-coordinating DNA-binding domains{2}	Nuclear receptors with C4 zinc fingers{2.1}	4.9e-142	6.23e-05	MA0258.2	JASPAR	ESR2
425	PEAKS036567	ESR1	ENSMUSG00000019768	Zinc-coordinating DNA-binding domains{2}	Nuclear receptors with C4 zinc fingers{2.1}	5.64e-128	0.000726	MA0592.3	JASPAR	ESRRA
426	PEAKS037554	ESR1	ENSMUSG00000019768	Zinc-coordinating DNA-binding domains{2}	Nuclear receptors with C4 zinc fingers{2.1}	0	2.19e-14	MA0258.2	JASPAR	ESR2
427	PEAKS038233	ESR1	ENSMUSG00000019768	Zinc-coordinating DNA-binding domains{2}	Nuclear receptors with C4 zinc fingers{2.1}	1.24e-285	4.69e-15	MA0258.2	JASPAR	ESR2
428	PEAKS038872	ESR1	ENSMUSG00000019768	Zinc-coordinating DNA-binding domains{2}	Nuclear receptors with C4 zinc fingers{2.1}	7.12e-11	1	#N/A	#N/A	#N/A
429	PEAKS040741	ESR1	ENSMUSG00000019768	Zinc-coordinating DNA-binding domains{2}	Nuclear receptors with C4 zinc fingers{2.1}	8.12e-08	1	#N/A	#N/A	#N/A
430	PEAKS057223	ESR1	ENSMUSG00000019768	Zinc-coordinating DNA-binding domains{2}	Nuclear receptors with C4 zinc fingers{2.1}	0	4.67e-10	MA0643.1	JASPAR	ESRRG
431	PEAKS057444	ESR1	ENSMUSG00000019768	Zinc-coordinating DNA-binding domains{2}	Nuclear receptors with C4 zinc fingers{2.1}	0	3.36e-13	MA0258.2	JASPAR	ESR2
432	PEAKS057031	ESR2	ENSMUSG00000021055	Zinc-coordinating DNA-binding domains{2}	Nuclear receptors with C4 zinc fingers{2.1}	1.1e-118	3.46e-13	MA0258.2	JASPAR	ESR2
433	PEAKS036172	ESRRA	ENSMUSG00000024955	Zinc-coordinating DNA-binding domains{2}	Nuclear receptors with C4 zinc fingers{2.1}	0	2.98e-10	MA0643.1	JASPAR	ESRRG
434	PEAKS040010	ESRRA	ENSMUSG00000024955	Zinc-coordinating DNA-binding domains{2}	Nuclear receptors with C4 zinc fingers{2.1}	1.85e-221	3.72e-10	MA0643.1	JASPAR	ESRRG
435	PEAKS040112	ESRRA	ENSMUSG00000024955	Zinc-coordinating DNA-binding domains{2}	Nuclear receptors with C4 zinc fingers{2.1}	0	2.69e-11	MA0592.3	JASPAR	ESRRA
436	PEAKS040113	ESRRA	ENSMUSG00000024955	Zinc-coordinating DNA-binding domains{2}	Nuclear receptors with C4 zinc fingers{2.1}	0	2.42e-12	MA0592.3	JASPAR	ESRRA
437	PEAKS048563	ESRRG	ENSMUSG00000026610	Zinc-coordinating DNA-binding domains{2}	Nuclear receptors with C4 zinc fingers{2.1}	0	7.04e-10	MA0643.1	JASPAR	ESRRG
438	PEAKS048564	ESRRG	ENSMUSG00000026610	Zinc-coordinating DNA-binding domains{2}	Nuclear receptors with C4 zinc fingers{2.1}	0	6.47e-12	MA0592.3	JASPAR	ESRRA
439	PEAKS036080	ETS1	ENSMUSG00000032035	Helix-turn-helix domains{3}	Tryptophan cluster factors{3.5}	1e-75	5.32e-06	MA0076.2	JASPAR	ELK4
440	PEAKS036081	ETS1	ENSMUSG00000032035	Helix-turn-helix domains{3}	Tryptophan cluster factors{3.5}	4.83e-121	4.2e-08	MA0076.2	JASPAR	ELK4
441	PEAKS036648	ETS1	ENSMUSG00000032035	Helix-turn-helix domains{3}	Tryptophan cluster factors{3.5}	1.78e-274	2.57e-09	MA0640.2	JASPAR	ELF3
442	PEAKS039242	ETS1	ENSMUSG00000032035	Helix-turn-helix domains{3}	Tryptophan cluster factors{3.5}	4.4e-292	2.11e-06	MA0076.2	JASPAR	ELK4
443	PEAKS039243	ETS1	ENSMUSG00000032035	Helix-turn-helix domains{3}	Tryptophan cluster factors{3.5}	2.18e-261	4.44e-05	MA0076.2	JASPAR	ELK4
444	PEAKS040097	ETS1	ENSMUSG00000032035	Helix-turn-helix domains{3}	Tryptophan cluster factors{3.5}	1.39e-279	7.42e-11	MA0076.2	JASPAR	ELK4
445	PEAKS035862	ETS2	ENSMUSG00000022895	Helix-turn-helix domains{3}	Tryptophan cluster factors{3.5}	8.19e-72	1	#N/A	#N/A	#N/A
446	PEAKS035863	ETS2	ENSMUSG00000022895	Helix-turn-helix domains{3}	Tryptophan cluster factors{3.5}	9.32e-81	1	#N/A	#N/A	#N/A
447	PEAKS041064	ETV6	ENSMUSG00000030199	Helix-turn-helix domains{3}	Tryptophan cluster factors{3.5}	0	1.75e-08	MA1484.1	JASPAR	ETS2
448	PEAKS041065	ETV6	ENSMUSG00000030199	Helix-turn-helix domains{3}	Tryptophan cluster factors{3.5}	0	3.78e-10	MA0076.2	JASPAR	ELK4
449	PEAKS038557	FEV	ENSMUSG00000055197	Helix-turn-helix domains{3}	Tryptophan cluster factors{3.5}	1.99e-169	0.518	MA0641.1	JASPAR	ELF4
450	PEAKS035515	FLI1	ENSMUSG00000016087	Helix-turn-helix domains{3}	Tryptophan cluster factors{3.5}	0	3.34e-13	MA0076.2	JASPAR	ELK4
451	PEAKS036886	FLI1	ENSMUSG00000016087	Helix-turn-helix domains{3}	Tryptophan cluster factors{3.5}	0	7.53e-09	MA0474.3	JASPAR	ERG
452	PEAKS040400	FLI1	ENSMUSG00000016087	Helix-turn-helix domains{3}	Tryptophan cluster factors{3.5}	0	3.69e-11	MA0474.3	JASPAR	ERG
453	PEAKS038481	FOS	ENSMUSG00000021250	Basic domains{1}	Basic leucine zipper factors (bZIP){1.1}	0	5.96e-07	MA0478.1	JASPAR	FOSL2
454	PEAKS038482	FOS	ENSMUSG00000021250	Basic domains{1}	Basic leucine zipper factors (bZIP){1.1}	0	8.37e-07	MA0478.1	JASPAR	FOSL2
455	PEAKS038483	FOS	ENSMUSG00000021250	Basic domains{1}	Basic leucine zipper factors (bZIP){1.1}	8.48e-269	4.77e-07	MA0478.1	JASPAR	FOSL2
456	PEAKS038484	FOS	ENSMUSG00000021250	Basic domains{1}	Basic leucine zipper factors (bZIP){1.1}	0	7.15e-07	MA0478.1	JASPAR	FOSL2
457	PEAKS039300	FOS	ENSMUSG00000021250	Basic domains{1}	Basic leucine zipper factors (bZIP){1.1}	0.000561	1	#N/A	#N/A	#N/A
458	PEAKS039302	FOS	ENSMUSG00000021250	Basic domains{1}	Basic leucine zipper factors (bZIP){1.1}	3.98e-203	9.54e-07	MA0478.1	JASPAR	FOSL2
459	PEAKS039303	FOS	ENSMUSG00000021250	Basic domains{1}	Basic leucine zipper factors (bZIP){1.1}	0	2.36e-10	MA0476.1	JASPAR	FOS
460	PEAKS039305	FOS	ENSMUSG00000021250	Basic domains{1}	Basic leucine zipper factors (bZIP){1.1}	0.00247	1	#N/A	#N/A	#N/A
461	PEAKS039309	FOS	ENSMUSG00000021250	Basic domains{1}	Basic leucine zipper factors (bZIP){1.1}	1.24e-149	0.379	MA0476.1	JASPAR	FOS
462	PEAKS039310	FOS	ENSMUSG00000021250	Basic domains{1}	Basic leucine zipper factors (bZIP){1.1}	0	7.14e-11	MA0476.1	JASPAR	FOS
463	PEAKS039313	FOS	ENSMUSG00000021250	Basic domains{1}	Basic leucine zipper factors (bZIP){1.1}	1.67e-178	0.558	MA0655.1	JASPAR	JDP2
464	PEAKS039315	FOS	ENSMUSG00000021250	Basic domains{1}	Basic leucine zipper factors (bZIP){1.1}	3.66e-05	1	#N/A	#N/A	#N/A
465	PEAKS039317	FOS	ENSMUSG00000021250	Basic domains{1}	Basic leucine zipper factors (bZIP){1.1}	1.35e-292	9.8e-07	MA0478.1	JASPAR	FOSL2
466	PEAKS039319	FOS	ENSMUSG00000021250	Basic domains{1}	Basic leucine zipper factors (bZIP){1.1}	8.05e-06	1	#N/A	#N/A	#N/A
467	PEAKS040968	FOS	ENSMUSG00000021250	Basic domains{1}	Basic leucine zipper factors (bZIP){1.1}	0	2.11e-09	MA0477.2	JASPAR	FOSL1
468	PEAKS040969	FOS	ENSMUSG00000021250	Basic domains{1}	Basic leucine zipper factors (bZIP){1.1}	0	1.4e-06	MA0476.1	JASPAR	FOS
469	PEAKS040970	FOS	ENSMUSG00000021250	Basic domains{1}	Basic leucine zipper factors (bZIP){1.1}	0	7.08e-10	MA0478.1	JASPAR	FOSL2
470	PEAKS040971	FOS	ENSMUSG00000021250	Basic domains{1}	Basic leucine zipper factors (bZIP){1.1}	0	1.39e-06	MA1988.1	JASPAR	ATF3
471	PEAKS040972	FOS	ENSMUSG00000021250	Basic domains{1}	Basic leucine zipper factors (bZIP){1.1}	0	2.86e-06	MA1988.1	JASPAR	ATF3
472	PEAKS049568	FOS	ENSMUSG00000021250	Basic domains{1}	Basic leucine zipper factors (bZIP){1.1}	4.16e-07	1	#N/A	#N/A	#N/A
473	PEAKS049570	FOS	ENSMUSG00000021250	Basic domains{1}	Basic leucine zipper factors (bZIP){1.1}	0	3.98e-07	MA0478.1	JASPAR	FOSL2
474	PEAKS049571	FOS	ENSMUSG00000021250	Basic domains{1}	Basic leucine zipper factors (bZIP){1.1}	0	6.33e-07	MA0478.1	JASPAR	FOSL2
475	PEAKS049582	FOS	ENSMUSG00000021250	Basic domains{1}	Basic leucine zipper factors (bZIP){1.1}	0	1.5e-10	MA0478.1	JASPAR	FOSL2
476	PEAKS049583	FOS	ENSMUSG00000021250	Basic domains{1}	Basic leucine zipper factors (bZIP){1.1}	0	3.55e-10	MA0478.1	JASPAR	FOSL2
477	PEAKS054856	FOS	ENSMUSG00000021250	Basic domains{1}	Basic leucine zipper factors (bZIP){1.1}	0	3.58e-07	MA0478.1	JASPAR	FOSL2
478	PEAKS054857	FOS	ENSMUSG00000021250	Basic domains{1}	Basic leucine zipper factors (bZIP){1.1}	9.09e-130	0.397	MA0476.1	JASPAR	FOS
479	PEAKS054870	FOS	ENSMUSG00000021250	Basic domains{1}	Basic leucine zipper factors (bZIP){1.1}	0	2.06e-09	MA0478.1	JASPAR	FOSL2
480	PEAKS054871	FOS	ENSMUSG00000021250	Basic domains{1}	Basic leucine zipper factors (bZIP){1.1}	2.4e-242	2.94e-11	MA1988.1	JASPAR	ATF3
481	PEAKS039301	FOSB	ENSMUSG00000003545	Basic domains{1}	Basic leucine zipper factors (bZIP){1.1}	1.88e-11	1	#N/A	#N/A	#N/A
482	PEAKS039304	FOSB	ENSMUSG00000003545	Basic domains{1}	Basic leucine zipper factors (bZIP){1.1}	5.93e-273	7.15e-07	MA0478.1	JASPAR	FOSL2
483	PEAKS039311	FOSB	ENSMUSG00000003545	Basic domains{1}	Basic leucine zipper factors (bZIP){1.1}	2.71e-274	1.22e-10	MA0478.1	JASPAR	FOSL2
484	PEAKS039314	FOSB	ENSMUSG00000003545	Basic domains{1}	Basic leucine zipper factors (bZIP){1.1}	0	4.07e-10	MA0478.1	JASPAR	FOSL2
485	PEAKS039316	FOSB	ENSMUSG00000003545	Basic domains{1}	Basic leucine zipper factors (bZIP){1.1}	9.78e-113	4.77e-07	MA0478.1	JASPAR	FOSL2
486	PEAKS039318	FOSB	ENSMUSG00000003545	Basic domains{1}	Basic leucine zipper factors (bZIP){1.1}	0	1.85e-08	MA0477.2	JASPAR	FOSL1
487	PEAKS039320	FOSB	ENSMUSG00000003545	Basic domains{1}	Basic leucine zipper factors (bZIP){1.1}	6.51e-115	2.27e-08	MA0478.1	JASPAR	FOSL2
488	PEAKS041066	FOSL2	ENSMUSG00000029135	Basic domains{1}	Basic leucine zipper factors (bZIP){1.1}	0	4.14e-09	MA0478.1	JASPAR	FOSL2
489	PEAKS041067	FOSL2	ENSMUSG00000029135	Basic domains{1}	Basic leucine zipper factors (bZIP){1.1}	0	1.17e-09	MA0478.1	JASPAR	FOSL2
490	PEAKS041068	FOSL2	ENSMUSG00000029135	Basic domains{1}	Basic leucine zipper factors (bZIP){1.1}	0	3.08e-06	MA1988.1	JASPAR	ATF3
491	PEAKS049574	FOSL2	ENSMUSG00000029135	Basic domains{1}	Basic leucine zipper factors (bZIP){1.1}	0	1.63e-11	MA0478.1	JASPAR	FOSL2
492	PEAKS049575	FOSL2	ENSMUSG00000029135	Basic domains{1}	Basic leucine zipper factors (bZIP){1.1}	0	5.02e-11	MA0478.1	JASPAR	FOSL2
493	PEAKS049576	FOSL2	ENSMUSG00000029135	Basic domains{1}	Basic leucine zipper factors (bZIP){1.1}	0	7.23e-12	MA0478.1	JASPAR	FOSL2
494	PEAKS049577	FOSL2	ENSMUSG00000029135	Basic domains{1}	Basic leucine zipper factors (bZIP){1.1}	0	6.08e-10	MA0478.1	JASPAR	FOSL2
495	PEAKS054858	FOSL2	ENSMUSG00000029135	Basic domains{1}	Basic leucine zipper factors (bZIP){1.1}	0	5.96e-07	MA0478.1	JASPAR	FOSL2
496	PEAKS054859	FOSL2	ENSMUSG00000029135	Basic domains{1}	Basic leucine zipper factors (bZIP){1.1}	0	5.2e-09	MA0478.1	JASPAR	FOSL2
497	PEAKS035679	FOXA1	ENSMUSG00000035451	Helix-turn-helix domains{3}	Fork head / winged helix factors{3.3}	4.71e-241	1.68e-09	MA0846.1	JASPAR	FOXC2
498	PEAKS036274	FOXA1	ENSMUSG00000035451	Helix-turn-helix domains{3}	Fork head / winged helix factors{3.3}	3.53e-241	1.22e-08	MA0846.1	JASPAR	FOXC2
499	PEAKS036286	FOXA1	ENSMUSG00000035451	Helix-turn-helix domains{3}	Fork head / winged helix factors{3.3}	2.15e-232	3.95e-09	MA0846.1	JASPAR	FOXC2
500	PEAKS048589	FOXA1	ENSMUSG00000035451	Helix-turn-helix domains{3}	Fork head / winged helix factors{3.3}	4.14e-221	1.24e-09	MA0845.1	JASPAR	FOXB1
501	PEAKS048590	FOXA1	ENSMUSG00000035451	Helix-turn-helix domains{3}	Fork head / winged helix factors{3.3}	5e-224	7.75e-09	MA0845.1	JASPAR	FOXB1
502	PEAKS048591	FOXA1	ENSMUSG00000035451	Helix-turn-helix domains{3}	Fork head / winged helix factors{3.3}	5e-224	1.77e-10	MA0846.1	JASPAR	FOXC2
503	PEAKS048592	FOXA1	ENSMUSG00000035451	Helix-turn-helix domains{3}	Fork head / winged helix factors{3.3}	0	1.53e-08	MA0846.1	JASPAR	FOXC2
504	PEAKS048593	FOXA1	ENSMUSG00000035451	Helix-turn-helix domains{3}	Fork head / winged helix factors{3.3}	0	2.03e-10	MA0845.1	JASPAR	FOXB1
505	PEAKS048594	FOXA1	ENSMUSG00000035451	Helix-turn-helix domains{3}	Fork head / winged helix factors{3.3}	0	7.43e-10	MA0846.1	JASPAR	FOXC2
506	PEAKS054843	FOXA1	ENSMUSG00000035451	Helix-turn-helix domains{3}	Fork head / winged helix factors{3.3}	2.07e-250	1.24e-09	MA0846.1	JASPAR	FOXC2
507	PEAKS057422	FOXA1	ENSMUSG00000035451	Helix-turn-helix domains{3}	Fork head / winged helix factors{3.3}	1.77e-282	1.03e-08	MA0845.1	JASPAR	FOXB1
508	PEAKS057424	FOXA1	ENSMUSG00000035451	Helix-turn-helix domains{3}	Fork head / winged helix factors{3.3}	7.86e-142	7.83e-10	MA0852.2	JASPAR	FOXK1
509	PEAKS057426	FOXA1	ENSMUSG00000035451	Helix-turn-helix domains{3}	Fork head / winged helix factors{3.3}	1.4e-248	4.8e-08	MA0846.1	JASPAR	FOXC2
510	PEAKS035249	FOXA2	ENSMUSG00000037025	Helix-turn-helix domains{3}	Fork head / winged helix factors{3.3}	7.62e-210	1.17e-09	MA0846.1	JASPAR	FOXC2
511	PEAKS035599	FOXA2	ENSMUSG00000037025	Helix-turn-helix domains{3}	Fork head / winged helix factors{3.3}	7.81e-175	2.98e-08	MA0593.1	JASPAR	FOXP2
512	PEAKS035678	FOXA2	ENSMUSG00000037025	Helix-turn-helix domains{3}	Fork head / winged helix factors{3.3}	9.2e-289	3.06e-08	MA0852.2	JASPAR	FOXK1
513	PEAKS037143	FOXA2	ENSMUSG00000037025	Helix-turn-helix domains{3}	Fork head / winged helix factors{3.3}	5.51e-228	2.25e-09	MA0846.1	JASPAR	FOXC2
514	PEAKS038234	FOXA2	ENSMUSG00000037025	Helix-turn-helix domains{3}	Fork head / winged helix factors{3.3}	3.05e-235	2.37e-08	MA0845.1	JASPAR	FOXB1
515	PEAKS039577	FOXA2	ENSMUSG00000037025	Helix-turn-helix domains{3}	Fork head / winged helix factors{3.3}	5e-192	4.32e-08	MA0032.2	JASPAR	FOXC1
516	PEAKS038882	FOXA3	ENSMUSG00000040891	Helix-turn-helix domains{3}	Fork head / winged helix factors{3.3}	1.22e-202	8.94e-10	MA0852.2	JASPAR	FOXK1
517	PEAKS038883	FOXA3	ENSMUSG00000040891	Helix-turn-helix domains{3}	Fork head / winged helix factors{3.3}	1.38e-214	4.17e-10	MA0846.1	JASPAR	FOXC2
518	PEAKS038924	FOXF1	ENSMUSG00000042812	Helix-turn-helix domains{3}	Fork head / winged helix factors{3.3}	1.22e-215	4.41e-07	MA0593.1	JASPAR	FOXP2
519	PEAKS049810	FOXG1	ENSMUSG00000020950	Helix-turn-helix domains{3}	Fork head / winged helix factors{3.3}	1.06e-77	5.67e-06	MA0480.2	JASPAR	FOXO1
520	PEAKS049811	FOXG1	ENSMUSG00000020950	Helix-turn-helix domains{3}	Fork head / winged helix factors{3.3}	2.61e-71	0.195	MA0850.1	JASPAR	FOXP3
521	PEAKS055621	FOXH1	ENSMUSG00000033837	Helix-turn-helix domains{3}	Fork head / winged helix factors{3.3}	5.06e-129	1	#N/A	#N/A	#N/A
522	PEAKS037388	FOXL2	ENSMUSG00000050397	Helix-turn-helix domains{3}	Fork head / winged helix factors{3.3}	3.99e-205	5.67e-10	MA1607.1	JASPAR	FOXL2
523	PEAKS037553	FOXL2	ENSMUSG00000050397	Helix-turn-helix domains{3}	Fork head / winged helix factors{3.3}	2.46e-224	2.26e-09	MA1607.1	JASPAR	FOXL2
524	PEAKS038632	FOXN1	ENSMUSG00000002057	Helix-turn-helix domains{3}	Fork head / winged helix factors{3.3}	5.83e-47	1	#N/A	#N/A	#N/A
525	PEAKS036075	FOXO1	ENSMUSG00000044167	Helix-turn-helix domains{3}	Fork head / winged helix factors{3.3}	1.96e-169	2.4e-11	MA0852.2	JASPAR	FOXK1
526	PEAKS036257	FOXO1	ENSMUSG00000044167	Helix-turn-helix domains{3}	Fork head / winged helix factors{3.3}	1.34e-220	4.49e-08	MA0849.1	JASPAR	FOXO6
527	PEAKS036258	FOXO1	ENSMUSG00000044167	Helix-turn-helix domains{3}	Fork head / winged helix factors{3.3}	2.89e-103	1.37e-06	MA0852.2	JASPAR	FOXK1
528	PEAKS036930	FOXO1	ENSMUSG00000044167	Helix-turn-helix domains{3}	Fork head / winged helix factors{3.3}	3.56e-258	4.69e-11	MA0852.2	JASPAR	FOXK1
529	PEAKS037345	FOXO1	ENSMUSG00000044167	Helix-turn-helix domains{3}	Fork head / winged helix factors{3.3}	2.67e-248	5.17e-10	MA0852.2	JASPAR	FOXK1
530	PEAKS050687	FOXO1	ENSMUSG00000044167	Helix-turn-helix domains{3}	Fork head / winged helix factors{3.3}	4.86e-186	3.01e-06	MA0480.2	JASPAR	FOXO1
531	PEAKS050688	FOXO1	ENSMUSG00000044167	Helix-turn-helix domains{3}	Fork head / winged helix factors{3.3}	6.91e-113	0.123	MA0479.1	JASPAR	FOXH1
532	PEAKS050758	FOXO1	ENSMUSG00000044167	Helix-turn-helix domains{3}	Fork head / winged helix factors{3.3}	1.22e-125	0.314	MA0479.1	JASPAR	FOXH1
533	PEAKS055001	FOXP1	ENSMUSG00000030067	Helix-turn-helix domains{3}	Fork head / winged helix factors{3.3}	2.75e-48	0.205	MA0031.1	JASPAR	FOXD1
534	PEAKS036084	FOXP3	ENSMUSG00000039521	Helix-turn-helix domains{3}	Fork head / winged helix factors{3.3}	1.17e-43	0.0561	MA1684.1	JASPAR	FOXN1
535	PEAKS039656	FOXP3	ENSMUSG00000039521	Helix-turn-helix domains{3}	Fork head / winged helix factors{3.3}	1.54e-24	1	#N/A	#N/A	#N/A
536	PEAKS039658	FOXP3	ENSMUSG00000039521	Helix-turn-helix domains{3}	Fork head / winged helix factors{3.3}	2.29e-23	0.0761	MA1684.1	JASPAR	FOXN1
537	PEAKS039659	FOXP3	ENSMUSG00000039521	Helix-turn-helix domains{3}	Fork head / winged helix factors{3.3}	1.8e-14	0.0277	MA0032.2	JASPAR	FOXC1
538	PEAKS039660	FOXP3	ENSMUSG00000039521	Helix-turn-helix domains{3}	Fork head / winged helix factors{3.3}	2.61e-13	0.00419	MA0479.1	JASPAR	FOXH1
539	PEAKS040450	FOXP3	ENSMUSG00000039521	Helix-turn-helix domains{3}	Fork head / winged helix factors{3.3}	4.8e-52	0.0638	MA1684.1	JASPAR	FOXN1
540	PEAKS040451	FOXP3	ENSMUSG00000039521	Helix-turn-helix domains{3}	Fork head / winged helix factors{3.3}	1.58e-77	0.0633	MA1684.1	JASPAR	FOXN1
541	PEAKS055683	FOXP3	ENSMUSG00000039521	Helix-turn-helix domains{3}	Fork head / winged helix factors{3.3}	1.1e-28	0.0603	MA0850.1	JASPAR	FOXP3
542	PEAKS055684	FOXP3	ENSMUSG00000039521	Helix-turn-helix domains{3}	Fork head / winged helix factors{3.3}	7.55e-20	1	#N/A	#N/A	#N/A
543	PEAKS057187	FOXP3	ENSMUSG00000039521	Helix-turn-helix domains{3}	Fork head / winged helix factors{3.3}	1.14e-46	0.0948	MA1684.1	JASPAR	FOXN1
544	PEAKS057188	FOXP3	ENSMUSG00000039521	Helix-turn-helix domains{3}	Fork head / winged helix factors{3.3}	4.96e-42	0.101	MA1684.1	JASPAR	FOXN1
545	PEAKS057192	FOXP3	ENSMUSG00000039521	Helix-turn-helix domains{3}	Fork head / winged helix factors{3.3}	1.52e-42	0.0496	MA0849.1	JASPAR	FOXO6
546	PEAKS057193	FOXP3	ENSMUSG00000039521	Helix-turn-helix domains{3}	Fork head / winged helix factors{3.3}	1.51e-53	0.0625	MA1684.1	JASPAR	FOXN1
547	PEAKS059306	FOXP3	ENSMUSG00000039521	Helix-turn-helix domains{3}	Fork head / winged helix factors{3.3}	8.26e-20	0.0776	MA1684.1	JASPAR	FOXN1
548	PEAKS039651	GABPA	ENSMUSG00000008976	Helix-turn-helix domains{3}	Tryptophan cluster factors{3.5}	0	4.1e-13	MA0076.2	JASPAR	ELK4
549	PEAKS040405	GABPA	ENSMUSG00000008976	Helix-turn-helix domains{3}	Tryptophan cluster factors{3.5}	0	1.83e-10	MA0076.2	JASPAR	ELK4
550	PEAKS040406	GABPA	ENSMUSG00000008976	Helix-turn-helix domains{3}	Tryptophan cluster factors{3.5}	0	3.36e-13	MA0076.2	JASPAR	ELK4
551	PEAKS040407	GABPA	ENSMUSG00000008976	Helix-turn-helix domains{3}	Tryptophan cluster factors{3.5}	0	2.58e-09	MA0076.2	JASPAR	ELK4
552	PEAKS035331	GATA1	ENSMUSG00000031162	Zinc-coordinating DNA-binding domains{2}	Other C4 zinc finger-type factors{2.2}	0	1.26e-09	MA1104.2	JASPAR	GATA6
553	PEAKS035481	GATA1	ENSMUSG00000031162	Zinc-coordinating DNA-binding domains{2}	Other C4 zinc finger-type factors{2.2}	0	1.48e-09	MA0036.3	JASPAR	GATA2
554	PEAKS035518	GATA1	ENSMUSG00000031162	Zinc-coordinating DNA-binding domains{2}	Other C4 zinc finger-type factors{2.2}	1.67e-190	4.52e-10	MA0482.2	JASPAR	GATA4
555	PEAKS036144	GATA1	ENSMUSG00000031162	Zinc-coordinating DNA-binding domains{2}	Other C4 zinc finger-type factors{2.2}	2.81e-308	3.4e-08	MA0036.3	JASPAR	GATA2
556	PEAKS035260	GATA2	ENSMUSG00000015053	Zinc-coordinating DNA-binding domains{2}	Other C4 zinc finger-type factors{2.2}	4.75e-201	1.62e-09	MA0036.3	JASPAR	GATA2
557	PEAKS048667	GATA3	ENSMUSG00000015619	Zinc-coordinating DNA-binding domains{2}	Other C4 zinc finger-type factors{2.2}	9.08e-136	6.27e-09	MA1104.2	JASPAR	GATA6
558	PEAKS036330	GATA4	ENSMUSG00000021944	Zinc-coordinating DNA-binding domains{2}	Other C4 zinc finger-type factors{2.2}	1.46e-251	7.4e-11	MA1104.2	JASPAR	GATA6
559	PEAKS039539	GATA4	ENSMUSG00000021944	Zinc-coordinating DNA-binding domains{2}	Other C4 zinc finger-type factors{2.2}	4.33e-129	1.8e-08	MA0482.2	JASPAR	GATA4
560	PEAKS039540	GATA4	ENSMUSG00000021944	Zinc-coordinating DNA-binding domains{2}	Other C4 zinc finger-type factors{2.2}	3.54e-142	4.41e-09	MA1104.2	JASPAR	GATA6
561	PEAKS039541	GATA4	ENSMUSG00000021944	Zinc-coordinating DNA-binding domains{2}	Other C4 zinc finger-type factors{2.2}	4.81e-292	1.01e-06	MA0037.4	JASPAR	GATA3
562	PEAKS039542	GATA4	ENSMUSG00000021944	Zinc-coordinating DNA-binding domains{2}	Other C4 zinc finger-type factors{2.2}	0	2.68e-07	MA0036.3	JASPAR	GATA2
563	PEAKS041833	GATA4	ENSMUSG00000021944	Zinc-coordinating DNA-binding domains{2}	Other C4 zinc finger-type factors{2.2}	1.45e-292	2.38e-07	MA0036.3	JASPAR	GATA2
564	PEAKS057460	GATA4	ENSMUSG00000021944	Zinc-coordinating DNA-binding domains{2}	Other C4 zinc finger-type factors{2.2}	6.63e-222	1.26e-06	MA0037.4	JASPAR	GATA3
565	PEAKS057461	GATA4	ENSMUSG00000021944	Zinc-coordinating DNA-binding domains{2}	Other C4 zinc finger-type factors{2.2}	3.08e-189	4.02e-07	MA0037.4	JASPAR	GATA3
566	PEAKS057462	GATA4	ENSMUSG00000021944	Zinc-coordinating DNA-binding domains{2}	Other C4 zinc finger-type factors{2.2}	4.7e-214	1.24e-06	MA0036.3	JASPAR	GATA2
567	PEAKS057463	GATA4	ENSMUSG00000021944	Zinc-coordinating DNA-binding domains{2}	Other C4 zinc finger-type factors{2.2}	2.6e-229	4.02e-11	MA0037.4	JASPAR	GATA3
568	PEAKS057464	GATA4	ENSMUSG00000021944	Zinc-coordinating DNA-binding domains{2}	Other C4 zinc finger-type factors{2.2}	1.21e-207	1.42e-08	MA1104.2	JASPAR	GATA6
569	PEAKS057465	GATA4	ENSMUSG00000021944	Zinc-coordinating DNA-binding domains{2}	Other C4 zinc finger-type factors{2.2}	1.45e-222	4.77e-06	MA0035.4	JASPAR	GATA1
570	PEAKS057474	GATA4	ENSMUSG00000021944	Zinc-coordinating DNA-binding domains{2}	Other C4 zinc finger-type factors{2.2}	2.34e-246	0.638	MA1104.2	JASPAR	GATA6
571	PEAKS037140	GATA6	ENSMUSG00000005836	Zinc-coordinating DNA-binding domains{2}	Other C4 zinc finger-type factors{2.2}	2.36e-303	2.34e-09	MA0482.2	JASPAR	GATA4
572	PEAKS039700	GATA6	ENSMUSG00000005836	Zinc-coordinating DNA-binding domains{2}	Other C4 zinc finger-type factors{2.2}	0	7.53e-12	MA1970.1	JASPAR	TRPS1
573	PEAKS039701	GATA6	ENSMUSG00000005836	Zinc-coordinating DNA-binding domains{2}	Other C4 zinc finger-type factors{2.2}	0	1.63e-11	MA0037.4	JASPAR	GATA3
574	PEAKS036387	GFI1	ENSMUSG00000029275	Zinc-coordinating DNA-binding domains{2}	C2H2 zinc finger factors{2.3}	1.14e-142	4.42e-13	MA0483.1	JASPAR	GFI1B
575	PEAKS038227	GFI1	ENSMUSG00000029275	Zinc-coordinating DNA-binding domains{2}	C2H2 zinc finger factors{2.3}	5.06e-157	9.25e-08	MA0038.2	JASPAR	GFI1
576	PEAKS037839	GRHL2	ENSMUSG00000022286	Immunoglobulin fold{6}	Grainyhead domain factors{6.7}	1.86e-115	5.88e-07	MA1105.2	JASPAR	GRHL2
577	PEAKS049676	GRHL2	ENSMUSG00000022286	Immunoglobulin fold{6}	Grainyhead domain factors{6.7}	8.86e-229	1.38e-06	MA0647.1	JASPAR	GRHL1
578	PEAKS049680	GRHL2	ENSMUSG00000022286	Immunoglobulin fold{6}	Grainyhead domain factors{6.7}	7.17e-178	5.8e-08	MA0647.1	JASPAR	GRHL1
579	PEAKS052551	HAND2	ENSMUSG00000038193	Basic domains{1}	Basic helix-loop-helix factors (bHLH){1.2}	4.17e-29	0.00364	MA1123.2	JASPAR	TWIST1
580	PEAKS041069	HIF1A	ENSMUSG00000021109	Basic domains{1}	Basic helix-loop-helix factors (bHLH){1.2}	2.58e-214	1.2e-05	MA1106.1	JASPAR	HIF1A
581	PEAKS041070	HIF1A	ENSMUSG00000021109	Basic domains{1}	Basic helix-loop-helix factors (bHLH){1.2}	2.76e-225	9.47e-06	MA1560.1	JASPAR	SOHLH2
582	PEAKS050761	HNF1A	ENSMUSG00000029556	Helix-turn-helix domains{3}	Homeo domain factors{3.1}	1.19e-12	1	#N/A	#N/A	#N/A
583	PEAKS048565	HNF1B	ENSMUSG00000020679	Helix-turn-helix domains{3}	Homeo domain factors{3.1}	0	9.31e-08	MA0046.2	JASPAR	HNF1A
584	PEAKS035790	HNF4A	ENSMUSG00000017950	Zinc-coordinating DNA-binding domains{2}	Nuclear receptors with C4 zinc fingers{2.1}	1.47e-256	4.72e-09	MA0114.4	JASPAR	HNF4A
585	PEAKS035791	HNF4A	ENSMUSG00000017950	Zinc-coordinating DNA-binding domains{2}	Nuclear receptors with C4 zinc fingers{2.1}	8.54e-288	9.91e-11	MA0484.2	JASPAR	HNF4G
586	PEAKS036278	HNF4A	ENSMUSG00000017950	Zinc-coordinating DNA-binding domains{2}	Nuclear receptors with C4 zinc fingers{2.1}	6.21e-258	1.01e-06	MA0484.2	JASPAR	HNF4G
587	PEAKS037160	HNF4A	ENSMUSG00000017950	Zinc-coordinating DNA-binding domains{2}	Nuclear receptors with C4 zinc fingers{2.1}	2.78e-288	5.15e-09	MA0484.2	JASPAR	HNF4G
588	PEAKS037161	HNF4A	ENSMUSG00000017950	Zinc-coordinating DNA-binding domains{2}	Nuclear receptors with C4 zinc fingers{2.1}	0	3.61e-11	MA0484.2	JASPAR	HNF4G
589	PEAKS038886	HNF4A	ENSMUSG00000017950	Zinc-coordinating DNA-binding domains{2}	Nuclear receptors with C4 zinc fingers{2.1}	4.07e-218	1.41e-10	MA0484.2	JASPAR	HNF4G
590	PEAKS038887	HNF4A	ENSMUSG00000017950	Zinc-coordinating DNA-binding domains{2}	Nuclear receptors with C4 zinc fingers{2.1}	0	1.11e-11	MA0484.2	JASPAR	HNF4G
591	PEAKS040474	HNF4A	ENSMUSG00000017950	Zinc-coordinating DNA-binding domains{2}	Nuclear receptors with C4 zinc fingers{2.1}	5.79e-262	2.8e-09	MA0484.2	JASPAR	HNF4G
592	PEAKS040475	HNF4A	ENSMUSG00000017950	Zinc-coordinating DNA-binding domains{2}	Nuclear receptors with C4 zinc fingers{2.1}	0	1.93e-09	MA0114.4	JASPAR	HNF4A
593	PEAKS040511	HNF4A	ENSMUSG00000017950	Zinc-coordinating DNA-binding domains{2}	Nuclear receptors with C4 zinc fingers{2.1}	3.98e-218	8.49e-07	MA0484.2	JASPAR	HNF4G
594	PEAKS049330	HNF4A	ENSMUSG00000017950	Zinc-coordinating DNA-binding domains{2}	Nuclear receptors with C4 zinc fingers{2.1}	4.57e-278	3.13e-11	MA0484.2	JASPAR	HNF4G
595	PEAKS049331	HNF4A	ENSMUSG00000017950	Zinc-coordinating DNA-binding domains{2}	Nuclear receptors with C4 zinc fingers{2.1}	4.59e-277	5.06e-09	MA0114.4	JASPAR	HNF4A
596	PEAKS050010	HNF4A	ENSMUSG00000017950	Zinc-coordinating DNA-binding domains{2}	Nuclear receptors with C4 zinc fingers{2.1}	0	9.54e-09	MA0114.4	JASPAR	HNF4A
597	PEAKS050011	HNF4A	ENSMUSG00000017950	Zinc-coordinating DNA-binding domains{2}	Nuclear receptors with C4 zinc fingers{2.1}	0	9.23e-09	MA0114.4	JASPAR	HNF4A
598	PEAKS050012	HNF4A	ENSMUSG00000017950	Zinc-coordinating DNA-binding domains{2}	Nuclear receptors with C4 zinc fingers{2.1}	0	7.78e-09	MA0114.4	JASPAR	HNF4A
599	PEAKS050013	HNF4A	ENSMUSG00000017950	Zinc-coordinating DNA-binding domains{2}	Nuclear receptors with C4 zinc fingers{2.1}	0	1.08e-08	MA0114.4	JASPAR	HNF4A
600	PEAKS059094	HNF4A	ENSMUSG00000017950	Zinc-coordinating DNA-binding domains{2}	Nuclear receptors with C4 zinc fingers{2.1}	2.08e-264	2.9e-06	MA0484.2	JASPAR	HNF4G
601	PEAKS059095	HNF4A	ENSMUSG00000017950	Zinc-coordinating DNA-binding domains{2}	Nuclear receptors with C4 zinc fingers{2.1}	1.03e-264	1.4e-10	MA0484.2	JASPAR	HNF4G
602	PEAKS059096	HNF4A	ENSMUSG00000017950	Zinc-coordinating DNA-binding domains{2}	Nuclear receptors with C4 zinc fingers{2.1}	5.74e-241	6.92e-08	MA0114.4	JASPAR	HNF4A
603	PEAKS059097	HNF4A	ENSMUSG00000017950	Zinc-coordinating DNA-binding domains{2}	Nuclear receptors with C4 zinc fingers{2.1}	1.81e-247	2.55e-10	MA0484.2	JASPAR	HNF4G
604	PEAKS040476	HNF4G	ENSMUSG00000017688	Zinc-coordinating DNA-binding domains{2}	Nuclear receptors with C4 zinc fingers{2.1}	2.95e-248	3.41e-08	MA0484.2	JASPAR	HNF4G
605	PEAKS035431	HOXA9	ENSMUSG00000038227	Helix-turn-helix domains{3}	Homeo domain factors{3.1}	4.1e-69	0.000756	MA1473.1	JASPAR	CDX4
606	PEAKS042586	HOXA9	ENSMUSG00000038227	Helix-turn-helix domains{3}	Homeo domain factors{3.1}	0.00261	1	#N/A	#N/A	#N/A
607	PEAKS049616	HOXD11	ENSMUSG00000042499	Helix-turn-helix domains{3}	Homeo domain factors{3.1}	7.49e-113	1.07e-05	MA0899.1	JASPAR	HOXA10
608	PEAKS035768	IKZF1	ENSMUSG00000018654	Zinc-coordinating DNA-binding domains{2}	C2H2 zinc finger factors{2.3}	1.45e-35	6.82e-05	MA1508.1	JASPAR	IKZF1
609	PEAKS035778	IKZF1	ENSMUSG00000018654	Zinc-coordinating DNA-binding domains{2}	C2H2 zinc finger factors{2.3}	1.61e-96	0.00146	MA1652.1	JASPAR	ZKSCAN5
610	PEAKS035779	IKZF1	ENSMUSG00000018654	Zinc-coordinating DNA-binding domains{2}	C2H2 zinc finger factors{2.3}	7.84e-85	8.39e-09	MA1508.1	JASPAR	IKZF1
611	PEAKS035975	IKZF1	ENSMUSG00000018654	Zinc-coordinating DNA-binding domains{2}	C2H2 zinc finger factors{2.3}	4.43e-25	0.014	MA0116.1	JASPAR	ZNF423
612	PEAKS035976	IKZF1	ENSMUSG00000018654	Zinc-coordinating DNA-binding domains{2}	C2H2 zinc finger factors{2.3}	1.5e-18	0.00034	MA1652.1	JASPAR	ZKSCAN5
613	PEAKS036142	IKZF1	ENSMUSG00000018654	Zinc-coordinating DNA-binding domains{2}	C2H2 zinc finger factors{2.3}	1.14e-67	0.000244	MA1652.1	JASPAR	ZKSCAN5
614	PEAKS036426	IKZF1	ENSMUSG00000018654	Zinc-coordinating DNA-binding domains{2}	C2H2 zinc finger factors{2.3}	1.3e-66	0.000304	MA1652.1	JASPAR	ZKSCAN5
615	PEAKS037407	IKZF1	ENSMUSG00000018654	Zinc-coordinating DNA-binding domains{2}	C2H2 zinc finger factors{2.3}	7.5e-64	1.28e-05	MA1508.1	JASPAR	IKZF1
616	PEAKS037408	IKZF1	ENSMUSG00000018654	Zinc-coordinating DNA-binding domains{2}	C2H2 zinc finger factors{2.3}	7.26e-79	7.76e-05	MA1989.1	JASPAR	BCL11B
617	PEAKS037409	IKZF1	ENSMUSG00000018654	Zinc-coordinating DNA-binding domains{2}	C2H2 zinc finger factors{2.3}	3.14e-43	1	#N/A	#N/A	#N/A
618	PEAKS037410	IKZF1	ENSMUSG00000018654	Zinc-coordinating DNA-binding domains{2}	C2H2 zinc finger factors{2.3}	2.36e-15	0.000169	MA1989.1	JASPAR	BCL11B
619	PEAKS037888	IKZF1	ENSMUSG00000018654	Zinc-coordinating DNA-binding domains{2}	C2H2 zinc finger factors{2.3}	5.71e-65	8.31e-07	MA1508.1	JASPAR	IKZF1
620	PEAKS039244	IKZF1	ENSMUSG00000018654	Zinc-coordinating DNA-binding domains{2}	C2H2 zinc finger factors{2.3}	5.65e-89	0.000199	MA1508.1	JASPAR	IKZF1
621	PEAKS038501	IKZF2	ENSMUSG00000025997	Zinc-coordinating DNA-binding domains{2}	C2H2 zinc finger factors{2.3}	1	1	0	JASPAR	NA
622	PEAKS038502	IKZF2	ENSMUSG00000025997	Zinc-coordinating DNA-binding domains{2}	C2H2 zinc finger factors{2.3}	1	1	0	JASPAR	NA
623	PEAKS035767	IKZF3	ENSMUSG00000018168	Zinc-coordinating DNA-binding domains{2}	C2H2 zinc finger factors{2.3}	3.09e-92	1.6e-10	MA1992.1	JASPAR	IKZF3
624	PEAKS039237	IKZF3	ENSMUSG00000018168	Zinc-coordinating DNA-binding domains{2}	C2H2 zinc finger factors{2.3}	1.83e-89	0.000167	MA1992.1	JASPAR	IKZF3
625	PEAKS039575	INSM1	ENSMUSG00000068154	Zinc-coordinating DNA-binding domains{2}	C2H2 zinc finger factors{2.3}	4.53e-12	1	#N/A	#N/A	#N/A
626	PEAKS035868	IRF1	ENSMUSG00000018899	Helix-turn-helix domains{3}	Tryptophan cluster factors{3.5}	2.61e-25	0.0537	MA0050.3	JASPAR	IRF1
627	PEAKS035869	IRF1	ENSMUSG00000018899	Helix-turn-helix domains{3}	Tryptophan cluster factors{3.5}	0	7.37e-07	MA0051.1	JASPAR	IRF2
628	PEAKS035870	IRF1	ENSMUSG00000018899	Helix-turn-helix domains{3}	Tryptophan cluster factors{3.5}	2.64e-37	1	#N/A	#N/A	#N/A
629	PEAKS035871	IRF1	ENSMUSG00000018899	Helix-turn-helix domains{3}	Tryptophan cluster factors{3.5}	1.05e-141	4.28e-05	MA0051.1	JASPAR	IRF2
630	PEAKS037845	IRF1	ENSMUSG00000018899	Helix-turn-helix domains{3}	Tryptophan cluster factors{3.5}	0	3.57e-07	MA0051.1	JASPAR	IRF2
631	PEAKS038918	IRF1	ENSMUSG00000018899	Helix-turn-helix domains{3}	Tryptophan cluster factors{3.5}	0	2.95e-09	MA0050.3	JASPAR	IRF1
632	PEAKS038919	IRF1	ENSMUSG00000018899	Helix-turn-helix domains{3}	Tryptophan cluster factors{3.5}	2.61e-308	2.88e-09	MA0050.3	JASPAR	IRF1
633	PEAKS038920	IRF1	ENSMUSG00000018899	Helix-turn-helix domains{3}	Tryptophan cluster factors{3.5}	0	8.39e-08	MA0050.3	JASPAR	IRF1
634	PEAKS040302	IRF1	ENSMUSG00000018899	Helix-turn-helix domains{3}	Tryptophan cluster factors{3.5}	0	1.49e-06	MA0051.1	JASPAR	IRF2
635	PEAKS040303	IRF1	ENSMUSG00000018899	Helix-turn-helix domains{3}	Tryptophan cluster factors{3.5}	0	1.2e-06	MA0051.1	JASPAR	IRF2
636	PEAKS040779	IRF1	ENSMUSG00000018899	Helix-turn-helix domains{3}	Tryptophan cluster factors{3.5}	0	1.32e-10	MA1418.1	JASPAR	IRF3
637	PEAKS042179	IRF1	ENSMUSG00000018899	Helix-turn-helix domains{3}	Tryptophan cluster factors{3.5}	0	1.79e-07	MA0051.1	JASPAR	IRF2
638	PEAKS042180	IRF1	ENSMUSG00000018899	Helix-turn-helix domains{3}	Tryptophan cluster factors{3.5}	0	2.85e-07	MA0051.1	JASPAR	IRF2
639	PEAKS042181	IRF1	ENSMUSG00000018899	Helix-turn-helix domains{3}	Tryptophan cluster factors{3.5}	0	1.19e-06	MA0051.1	JASPAR	IRF2
640	PEAKS042182	IRF1	ENSMUSG00000018899	Helix-turn-helix domains{3}	Tryptophan cluster factors{3.5}	0	5.23e-07	MA0051.1	JASPAR	IRF2
641	PEAKS055531	IRF2	ENSMUSG00000031627	Helix-turn-helix domains{3}	Tryptophan cluster factors{3.5}	0.00682	1	#N/A	#N/A	#N/A
642	PEAKS037919	IRF3	ENSMUSG00000003184	Helix-turn-helix domains{3}	Tryptophan cluster factors{3.5}	1.21e-252	2.1e-06	MA0051.1	JASPAR	IRF2
643	PEAKS037920	IRF3	ENSMUSG00000003184	Helix-turn-helix domains{3}	Tryptophan cluster factors{3.5}	0	1.81e-05	MA1418.1	JASPAR	IRF3
644	PEAKS037924	IRF3	ENSMUSG00000003184	Helix-turn-helix domains{3}	Tryptophan cluster factors{3.5}	4.38e-248	2.53e-06	MA0051.1	JASPAR	IRF2
645	PEAKS048604	IRF3	ENSMUSG00000003184	Helix-turn-helix domains{3}	Tryptophan cluster factors{3.5}	1.02e-71	0.000143	MA0051.1	JASPAR	IRF2
646	PEAKS048605	IRF3	ENSMUSG00000003184	Helix-turn-helix domains{3}	Tryptophan cluster factors{3.5}	5.49e-145	0.000966	MA0772.1	JASPAR	IRF7
647	PEAKS048606	IRF3	ENSMUSG00000003184	Helix-turn-helix domains{3}	Tryptophan cluster factors{3.5}	1.25e-92	0.0115	MA0051.1	JASPAR	IRF2
648	PEAKS035634	IRF4	ENSMUSG00000021356	Helix-turn-helix domains{3}	Tryptophan cluster factors{3.5}	1.01e-19	0.693	MA1418.1	JASPAR	IRF3
649	PEAKS035637	IRF4	ENSMUSG00000021356	Helix-turn-helix domains{3}	Tryptophan cluster factors{3.5}	5.64e-37	0.117	MA0050.3	JASPAR	IRF1
650	PEAKS036029	IRF4	ENSMUSG00000021356	Helix-turn-helix domains{3}	Tryptophan cluster factors{3.5}	1.17e-33	0.443	MA1420.1	JASPAR	IRF5
651	PEAKS036030	IRF4	ENSMUSG00000021356	Helix-turn-helix domains{3}	Tryptophan cluster factors{3.5}	4.12e-30	0.184	MA1420.1	JASPAR	IRF5
652	PEAKS036043	IRF4	ENSMUSG00000021356	Helix-turn-helix domains{3}	Tryptophan cluster factors{3.5}	1.11e-29	1	#N/A	#N/A	#N/A
653	PEAKS036044	IRF4	ENSMUSG00000021356	Helix-turn-helix domains{3}	Tryptophan cluster factors{3.5}	5.09e-25	1	#N/A	#N/A	#N/A
654	PEAKS036046	IRF4	ENSMUSG00000021356	Helix-turn-helix domains{3}	Tryptophan cluster factors{3.5}	6.63e-18	1	#N/A	#N/A	#N/A
655	PEAKS036335	IRF4	ENSMUSG00000021356	Helix-turn-helix domains{3}	Tryptophan cluster factors{3.5}	5.89e-15	0.36	MA0051.1	JASPAR	IRF2
656	PEAKS036425	IRF4	ENSMUSG00000021356	Helix-turn-helix domains{3}	Tryptophan cluster factors{3.5}	4.25e-183	1.03e-06	MA0050.3	JASPAR	IRF1
657	PEAKS036583	IRF4	ENSMUSG00000021356	Helix-turn-helix domains{3}	Tryptophan cluster factors{3.5}	4.11e-29	0.207	MA1420.1	JASPAR	IRF5
658	PEAKS039245	IRF4	ENSMUSG00000021356	Helix-turn-helix domains{3}	Tryptophan cluster factors{3.5}	7.35e-175	3.08e-06	MA1418.1	JASPAR	IRF3
659	PEAKS039246	IRF4	ENSMUSG00000021356	Helix-turn-helix domains{3}	Tryptophan cluster factors{3.5}	2.82e-173	2.35e-07	MA0050.3	JASPAR	IRF1
660	PEAKS040194	IRF4	ENSMUSG00000021356	Helix-turn-helix domains{3}	Tryptophan cluster factors{3.5}	2.4e-22	0.107	MA0051.1	JASPAR	IRF2
661	PEAKS040195	IRF4	ENSMUSG00000021356	Helix-turn-helix domains{3}	Tryptophan cluster factors{3.5}	8.21e-94	2.77e-12	MA0050.3	JASPAR	IRF1
662	PEAKS040196	IRF4	ENSMUSG00000021356	Helix-turn-helix domains{3}	Tryptophan cluster factors{3.5}	7.52e-83	3.59e-08	MA0050.3	JASPAR	IRF1
663	PEAKS040197	IRF4	ENSMUSG00000021356	Helix-turn-helix domains{3}	Tryptophan cluster factors{3.5}	1.44e-35	0.392	MA0653.1	JASPAR	IRF9
664	PEAKS040198	IRF4	ENSMUSG00000021356	Helix-turn-helix domains{3}	Tryptophan cluster factors{3.5}	5.43e-30	0.104	MA0051.1	JASPAR	IRF2
665	PEAKS040199	IRF4	ENSMUSG00000021356	Helix-turn-helix domains{3}	Tryptophan cluster factors{3.5}	2.97e-51	0.0292	MA0051.1	JASPAR	IRF2
666	PEAKS040200	IRF4	ENSMUSG00000021356	Helix-turn-helix domains{3}	Tryptophan cluster factors{3.5}	1.06e-28	0.201	MA1420.1	JASPAR	IRF5
667	PEAKS040267	IRF4	ENSMUSG00000021356	Helix-turn-helix domains{3}	Tryptophan cluster factors{3.5}	9.39e-19	0.372	MA0050.3	JASPAR	IRF1
668	PEAKS040268	IRF4	ENSMUSG00000021356	Helix-turn-helix domains{3}	Tryptophan cluster factors{3.5}	7.13e-15	0.548	MA1509.1	JASPAR	IRF6
669	PEAKS040781	IRF4	ENSMUSG00000021356	Helix-turn-helix domains{3}	Tryptophan cluster factors{3.5}	2.34e-14	0.568	MA1418.1	JASPAR	IRF3
670	PEAKS040782	IRF4	ENSMUSG00000021356	Helix-turn-helix domains{3}	Tryptophan cluster factors{3.5}	4.95e-13	1	#N/A	#N/A	#N/A
671	PEAKS041006	IRF4	ENSMUSG00000021356	Helix-turn-helix domains{3}	Tryptophan cluster factors{3.5}	1.14e-46	1	#N/A	#N/A	#N/A
672	PEAKS041071	IRF4	ENSMUSG00000021356	Helix-turn-helix domains{3}	Tryptophan cluster factors{3.5}	2.11e-29	0.0407	MA0050.3	JASPAR	IRF1
673	PEAKS041072	IRF4	ENSMUSG00000021356	Helix-turn-helix domains{3}	Tryptophan cluster factors{3.5}	1.34e-97	1.56e-11	MA0050.3	JASPAR	IRF1
674	PEAKS041073	IRF4	ENSMUSG00000021356	Helix-turn-helix domains{3}	Tryptophan cluster factors{3.5}	8.44e-31	0.243	MA1420.1	JASPAR	IRF5
675	PEAKS041074	IRF4	ENSMUSG00000021356	Helix-turn-helix domains{3}	Tryptophan cluster factors{3.5}	1.04e-24	0.026	MA0051.1	JASPAR	IRF2
676	PEAKS041075	IRF4	ENSMUSG00000021356	Helix-turn-helix domains{3}	Tryptophan cluster factors{3.5}	1.41e-29	0.0675	MA0050.3	JASPAR	IRF1
677	PEAKS041076	IRF4	ENSMUSG00000021356	Helix-turn-helix domains{3}	Tryptophan cluster factors{3.5}	5.35e-88	1	#N/A	#N/A	#N/A
678	PEAKS041077	IRF4	ENSMUSG00000021356	Helix-turn-helix domains{3}	Tryptophan cluster factors{3.5}	1.24e-33	0.557	MA1418.1	JASPAR	IRF3
679	PEAKS041078	IRF4	ENSMUSG00000021356	Helix-turn-helix domains{3}	Tryptophan cluster factors{3.5}	4.79e-45	0.522	MA1509.1	JASPAR	IRF6
680	PEAKS041079	IRF4	ENSMUSG00000021356	Helix-turn-helix domains{3}	Tryptophan cluster factors{3.5}	9.86e-20	1	#N/A	#N/A	#N/A
681	PEAKS041080	IRF4	ENSMUSG00000021356	Helix-turn-helix domains{3}	Tryptophan cluster factors{3.5}	1.08e-76	1	#N/A	#N/A	#N/A
682	PEAKS041081	IRF4	ENSMUSG00000021356	Helix-turn-helix domains{3}	Tryptophan cluster factors{3.5}	6.25e-24	0.571	MA1420.1	JASPAR	IRF5
683	PEAKS041083	IRF4	ENSMUSG00000021356	Helix-turn-helix domains{3}	Tryptophan cluster factors{3.5}	4.44e-22	0.691	MA1420.1	JASPAR	IRF5
684	PEAKS041084	IRF4	ENSMUSG00000021356	Helix-turn-helix domains{3}	Tryptophan cluster factors{3.5}	2.28e-26	0.613	MA1420.1	JASPAR	IRF5
685	PEAKS041085	IRF4	ENSMUSG00000021356	Helix-turn-helix domains{3}	Tryptophan cluster factors{3.5}	1.87e-32	0.569	MA0050.3	JASPAR	IRF1
686	PEAKS041086	IRF4	ENSMUSG00000021356	Helix-turn-helix domains{3}	Tryptophan cluster factors{3.5}	3.62e-33	0.315	MA1420.1	JASPAR	IRF5
687	PEAKS041087	IRF4	ENSMUSG00000021356	Helix-turn-helix domains{3}	Tryptophan cluster factors{3.5}	3.25e-23	0.317	MA1420.1	JASPAR	IRF5
688	PEAKS041088	IRF4	ENSMUSG00000021356	Helix-turn-helix domains{3}	Tryptophan cluster factors{3.5}	1.06e-75	1	#N/A	#N/A	#N/A
689	PEAKS046788	IRF4	ENSMUSG00000021356	Helix-turn-helix domains{3}	Tryptophan cluster factors{3.5}	7.82e-05	1	#N/A	#N/A	#N/A
690	PEAKS046791	IRF4	ENSMUSG00000021356	Helix-turn-helix domains{3}	Tryptophan cluster factors{3.5}	1.81e-06	1	#N/A	#N/A	#N/A
691	PEAKS048607	IRF5	ENSMUSG00000029771	Helix-turn-helix domains{3}	Tryptophan cluster factors{3.5}	2.52e-86	0.133	MA0772.1	JASPAR	IRF7
692	PEAKS048608	IRF5	ENSMUSG00000029771	Helix-turn-helix domains{3}	Tryptophan cluster factors{3.5}	9.11e-104	2.37e-07	MA0050.3	JASPAR	IRF1
693	PEAKS048609	IRF5	ENSMUSG00000029771	Helix-turn-helix domains{3}	Tryptophan cluster factors{3.5}	1.05e-60	1	#N/A	#N/A	#N/A
694	PEAKS037877	IRF8	ENSMUSG00000041515	Helix-turn-helix domains{3}	Tryptophan cluster factors{3.5}	2.61e-173	4.08e-07	MA0050.3	JASPAR	IRF1
695	PEAKS037879	IRF8	ENSMUSG00000041515	Helix-turn-helix domains{3}	Tryptophan cluster factors{3.5}	3.31e-230	9.13e-08	MA0050.3	JASPAR	IRF1
696	PEAKS037941	IRF8	ENSMUSG00000041515	Helix-turn-helix domains{3}	Tryptophan cluster factors{3.5}	0.00616	1	#N/A	#N/A	#N/A
697	PEAKS038228	IRF8	ENSMUSG00000041515	Helix-turn-helix domains{3}	Tryptophan cluster factors{3.5}	1.13e-122	4.99e-07	MA0050.3	JASPAR	IRF1
698	PEAKS038915	IRF8	ENSMUSG00000041515	Helix-turn-helix domains{3}	Tryptophan cluster factors{3.5}	0	1.97e-07	MA0050.3	JASPAR	IRF1
699	PEAKS038916	IRF8	ENSMUSG00000041515	Helix-turn-helix domains{3}	Tryptophan cluster factors{3.5}	0	1.8e-07	MA0050.3	JASPAR	IRF1
700	PEAKS038917	IRF8	ENSMUSG00000041515	Helix-turn-helix domains{3}	Tryptophan cluster factors{3.5}	0	6.66e-07	MA0050.3	JASPAR	IRF1
701	PEAKS048610	IRF8	ENSMUSG00000041515	Helix-turn-helix domains{3}	Tryptophan cluster factors{3.5}	1.61e-198	1.24e-07	MA0050.3	JASPAR	IRF1
702	PEAKS048611	IRF8	ENSMUSG00000041515	Helix-turn-helix domains{3}	Tryptophan cluster factors{3.5}	9.4e-204	5.72e-06	MA0050.3	JASPAR	IRF1
703	PEAKS048612	IRF8	ENSMUSG00000041515	Helix-turn-helix domains{3}	Tryptophan cluster factors{3.5}	2.64e-214	5.34e-07	MA0050.3	JASPAR	IRF1
704	PEAKS048613	IRF8	ENSMUSG00000041515	Helix-turn-helix domains{3}	Tryptophan cluster factors{3.5}	2.13e-201	6.42e-06	MA0050.3	JASPAR	IRF1
705	PEAKS048614	IRF8	ENSMUSG00000041515	Helix-turn-helix domains{3}	Tryptophan cluster factors{3.5}	9.69e-213	5.12e-06	MA0050.3	JASPAR	IRF1
706	PEAKS048615	IRF8	ENSMUSG00000041515	Helix-turn-helix domains{3}	Tryptophan cluster factors{3.5}	9.75e-185	3.51e-06	MA0050.3	JASPAR	IRF1
707	PEAKS055166	IRF8	ENSMUSG00000041515	Helix-turn-helix domains{3}	Tryptophan cluster factors{3.5}	2.18e-32	9.71e-09	MA0050.3	JASPAR	IRF1
708	PEAKS048308	ISX	ENSMUSG00000031621	Helix-turn-helix domains{3}	Homeo domain factors{3.1}	3.5e-05	1	#N/A	#N/A	#N/A
709	PEAKS048310	ISX	ENSMUSG00000031621	Helix-turn-helix domains{3}	Homeo domain factors{3.1}	3.31e-05	1	#N/A	#N/A	#N/A
710	PEAKS036034	JUN	ENSMUSG00000052684	Basic domains{1}	Basic leucine zipper factors (bZIP){1.1}	1.14e-130	3.22e-06	MA0489.2	JASPAR	JUN
711	PEAKS036048	JUN	ENSMUSG00000052684	Basic domains{1}	Basic leucine zipper factors (bZIP){1.1}	1.76e-111	1.19e-05	MA1101.2	JASPAR	BACH2
712	PEAKS036578	JUN	ENSMUSG00000052684	Basic domains{1}	Basic leucine zipper factors (bZIP){1.1}	8.37e-207	9.46e-10	MA0506.2	JASPAR	NRF1
713	PEAKS037022	JUN	ENSMUSG00000052684	Basic domains{1}	Basic leucine zipper factors (bZIP){1.1}	0	6.15e-07	MA1101.2	JASPAR	BACH2
714	PEAKS038512	JUN	ENSMUSG00000052684	Basic domains{1}	Basic leucine zipper factors (bZIP){1.1}	0	3.28e-07	MA0491.2	JASPAR	JUND
715	PEAKS048577	JUN	ENSMUSG00000052684	Basic domains{1}	Basic leucine zipper factors (bZIP){1.1}	3.1e-08	1	#N/A	#N/A	#N/A
716	PEAKS048580	JUN	ENSMUSG00000052684	Basic domains{1}	Basic leucine zipper factors (bZIP){1.1}	0.0105	1	#N/A	#N/A	#N/A
717	PEAKS049100	JUN	ENSMUSG00000052684	Basic domains{1}	Basic leucine zipper factors (bZIP){1.1}	4.89e-96	0.598	MA0150.2	JASPAR	NFE2L2
718	PEAKS049102	JUN	ENSMUSG00000052684	Basic domains{1}	Basic leucine zipper factors (bZIP){1.1}	0	7.57e-06	MA0489.2	JASPAR	JUN
719	PEAKS049109	JUN	ENSMUSG00000052684	Basic domains{1}	Basic leucine zipper factors (bZIP){1.1}	0	2.45e-05	MA0489.2	JASPAR	JUN
720	PEAKS049111	JUN	ENSMUSG00000052684	Basic domains{1}	Basic leucine zipper factors (bZIP){1.1}	0	2.38e-07	MA0491.2	JASPAR	JUND
721	PEAKS049116	JUN	ENSMUSG00000052684	Basic domains{1}	Basic leucine zipper factors (bZIP){1.1}	0	1.14e-05	MA0489.2	JASPAR	JUN
722	PEAKS049118	JUN	ENSMUSG00000052684	Basic domains{1}	Basic leucine zipper factors (bZIP){1.1}	0	1.66e-05	MA0489.2	JASPAR	JUN
723	PEAKS049128	JUN	ENSMUSG00000052684	Basic domains{1}	Basic leucine zipper factors (bZIP){1.1}	0	1.1e-05	MA1101.2	JASPAR	BACH2
724	PEAKS049129	JUN	ENSMUSG00000052684	Basic domains{1}	Basic leucine zipper factors (bZIP){1.1}	0	3.7e-06	MA1101.2	JASPAR	BACH2
725	PEAKS049134	JUN	ENSMUSG00000052684	Basic domains{1}	Basic leucine zipper factors (bZIP){1.1}	0	2.9e-07	MA1101.2	JASPAR	BACH2
726	PEAKS049139	JUN	ENSMUSG00000052684	Basic domains{1}	Basic leucine zipper factors (bZIP){1.1}	0	9.66e-06	MA1101.2	JASPAR	BACH2
727	PEAKS049832	JUN	ENSMUSG00000052684	Basic domains{1}	Basic leucine zipper factors (bZIP){1.1}	0	1.75e-05	MA0489.2	JASPAR	JUN
728	PEAKS054854	JUN	ENSMUSG00000052684	Basic domains{1}	Basic leucine zipper factors (bZIP){1.1}	0	2.53e-07	MA1101.2	JASPAR	BACH2
729	PEAKS054855	JUN	ENSMUSG00000052684	Basic domains{1}	Basic leucine zipper factors (bZIP){1.1}	0	2.82e-07	MA0491.2	JASPAR	JUND
730	PEAKS054868	JUN	ENSMUSG00000052684	Basic domains{1}	Basic leucine zipper factors (bZIP){1.1}	0	9.61e-10	MA0489.2	JASPAR	JUN
731	PEAKS054869	JUN	ENSMUSG00000052684	Basic domains{1}	Basic leucine zipper factors (bZIP){1.1}	0	1.54e-05	MA0489.2	JASPAR	JUN
732	PEAKS036047	JUNB	ENSMUSG00000052837	Basic domains{1}	Basic leucine zipper factors (bZIP){1.1}	0	7.83e-08	MA0489.2	JASPAR	JUN
733	PEAKS039312	JUNB	ENSMUSG00000052837	Basic domains{1}	Basic leucine zipper factors (bZIP){1.1}	0	2.5e-06	MA0489.2	JASPAR	JUN
734	PEAKS040265	JUNB	ENSMUSG00000052837	Basic domains{1}	Basic leucine zipper factors (bZIP){1.1}	0	5.9e-06	MA0489.2	JASPAR	JUN
735	PEAKS040266	JUNB	ENSMUSG00000052837	Basic domains{1}	Basic leucine zipper factors (bZIP){1.1}	0	4.36e-06	MA0489.2	JASPAR	JUN
736	PEAKS040304	JUNB	ENSMUSG00000052837	Basic domains{1}	Basic leucine zipper factors (bZIP){1.1}	0	7.57e-10	MA0491.2	JASPAR	JUND
737	PEAKS040305	JUNB	ENSMUSG00000052837	Basic domains{1}	Basic leucine zipper factors (bZIP){1.1}	3.38e-180	2.98e-07	MA0489.2	JASPAR	JUN
738	PEAKS040306	JUNB	ENSMUSG00000052837	Basic domains{1}	Basic leucine zipper factors (bZIP){1.1}	1.31e-271	2.59e-06	MA0489.2	JASPAR	JUN
739	PEAKS040888	JUNB	ENSMUSG00000052837	Basic domains{1}	Basic leucine zipper factors (bZIP){1.1}	1.78e-292	2.01e-08	MA0491.2	JASPAR	JUND
740	PEAKS040889	JUNB	ENSMUSG00000052837	Basic domains{1}	Basic leucine zipper factors (bZIP){1.1}	0	2.81e-08	MA0491.2	JASPAR	JUND
741	PEAKS040973	JUNB	ENSMUSG00000052837	Basic domains{1}	Basic leucine zipper factors (bZIP){1.1}	0	1.58e-05	MA0489.2	JASPAR	JUN
742	PEAKS040974	JUNB	ENSMUSG00000052837	Basic domains{1}	Basic leucine zipper factors (bZIP){1.1}	0	6.62e-06	MA0489.2	JASPAR	JUN
743	PEAKS040975	JUNB	ENSMUSG00000052837	Basic domains{1}	Basic leucine zipper factors (bZIP){1.1}	0	5.07e-09	MA0489.2	JASPAR	JUN
744	PEAKS040976	JUNB	ENSMUSG00000052837	Basic domains{1}	Basic leucine zipper factors (bZIP){1.1}	0	9.76e-09	MA0489.2	JASPAR	JUN
745	PEAKS040977	JUNB	ENSMUSG00000052837	Basic domains{1}	Basic leucine zipper factors (bZIP){1.1}	0	3.06e-05	MA1633.2	JASPAR	BACH1
746	PEAKS048616	JUNB	ENSMUSG00000052837	Basic domains{1}	Basic leucine zipper factors (bZIP){1.1}	7.08e-199	4.53e-06	MA0489.2	JASPAR	JUN
747	PEAKS048617	JUNB	ENSMUSG00000052837	Basic domains{1}	Basic leucine zipper factors (bZIP){1.1}	8.25e-225	1.19e-06	MA0489.2	JASPAR	JUN
748	PEAKS048618	JUNB	ENSMUSG00000052837	Basic domains{1}	Basic leucine zipper factors (bZIP){1.1}	2.16e-109	0.0359	MA0492.1	JASPAR	JUND
749	PEAKS054860	JUNB	ENSMUSG00000052837	Basic domains{1}	Basic leucine zipper factors (bZIP){1.1}	0	1.5e-05	MA1101.2	JASPAR	BACH2
750	PEAKS054872	JUNB	ENSMUSG00000052837	Basic domains{1}	Basic leucine zipper factors (bZIP){1.1}	0	1.83e-08	MA0489.2	JASPAR	JUN
751	PEAKS036049	JUND	ENSMUSG00000071076	Basic domains{1}	Basic leucine zipper factors (bZIP){1.1}	0	1.81e-05	MA0489.2	JASPAR	JUN
752	PEAKS040890	JUND	ENSMUSG00000071076	Basic domains{1}	Basic leucine zipper factors (bZIP){1.1}	0	8.34e-06	MA0489.2	JASPAR	JUN
753	PEAKS040891	JUND	ENSMUSG00000071076	Basic domains{1}	Basic leucine zipper factors (bZIP){1.1}	0	1.54e-05	MA0489.2	JASPAR	JUN
754	PEAKS040978	JUND	ENSMUSG00000071076	Basic domains{1}	Basic leucine zipper factors (bZIP){1.1}	0	1.2e-08	MA0489.2	JASPAR	JUN
755	PEAKS040979	JUND	ENSMUSG00000071076	Basic domains{1}	Basic leucine zipper factors (bZIP){1.1}	0	2.5e-08	MA1101.2	JASPAR	BACH2
756	PEAKS040980	JUND	ENSMUSG00000071076	Basic domains{1}	Basic leucine zipper factors (bZIP){1.1}	0	3.36e-07	MA1101.2	JASPAR	BACH2
757	PEAKS040981	JUND	ENSMUSG00000071076	Basic domains{1}	Basic leucine zipper factors (bZIP){1.1}	0	2.65e-07	MA0489.2	JASPAR	JUN
758	PEAKS040982	JUND	ENSMUSG00000071076	Basic domains{1}	Basic leucine zipper factors (bZIP){1.1}	0	7.06e-06	MA0489.2	JASPAR	JUN
759	PEAKS049578	JUND	ENSMUSG00000071076	Basic domains{1}	Basic leucine zipper factors (bZIP){1.1}	0	8.52e-09	MA1101.2	JASPAR	BACH2
760	PEAKS049579	JUND	ENSMUSG00000071076	Basic domains{1}	Basic leucine zipper factors (bZIP){1.1}	0	1.7e-09	MA0489.2	JASPAR	JUN
761	PEAKS049580	JUND	ENSMUSG00000071076	Basic domains{1}	Basic leucine zipper factors (bZIP){1.1}	0	1.7e-09	MA0489.2	JASPAR	JUN
762	PEAKS049581	JUND	ENSMUSG00000071076	Basic domains{1}	Basic leucine zipper factors (bZIP){1.1}	0	3.1e-09	MA1101.2	JASPAR	BACH2
763	PEAKS049584	JUND	ENSMUSG00000071076	Basic domains{1}	Basic leucine zipper factors (bZIP){1.1}	0	1.3e-07	MA1101.2	JASPAR	BACH2
764	PEAKS049585	JUND	ENSMUSG00000071076	Basic domains{1}	Basic leucine zipper factors (bZIP){1.1}	0	3.49e-08	MA1101.2	JASPAR	BACH2
765	PEAKS049586	JUND	ENSMUSG00000071076	Basic domains{1}	Basic leucine zipper factors (bZIP){1.1}	0	3.16e-08	MA1101.2	JASPAR	BACH2
766	PEAKS049587	JUND	ENSMUSG00000071076	Basic domains{1}	Basic leucine zipper factors (bZIP){1.1}	0	2.56e-09	MA0491.2	JASPAR	JUND
767	PEAKS054862	JUND	ENSMUSG00000071076	Basic domains{1}	Basic leucine zipper factors (bZIP){1.1}	0	2.43e-07	MA0491.2	JASPAR	JUND
768	PEAKS054863	JUND	ENSMUSG00000071076	Basic domains{1}	Basic leucine zipper factors (bZIP){1.1}	0	6.44e-09	MA1101.2	JASPAR	BACH2
769	PEAKS054874	JUND	ENSMUSG00000071076	Basic domains{1}	Basic leucine zipper factors (bZIP){1.1}	0	5.79e-10	MA0489.2	JASPAR	JUN
770	PEAKS054875	JUND	ENSMUSG00000071076	Basic domains{1}	Basic leucine zipper factors (bZIP){1.1}	0	2.41e-07	MA1101.2	JASPAR	BACH2
771	PEAKS036273	KLF1	ENSMUSG00000054191	Zinc-coordinating DNA-binding domains{2}	C2H2 zinc finger factors{2.3}	1.82e-63	0.0929	MA0657.1	JASPAR	KLF13
772	PEAKS038538	KLF15	ENSMUSG00000030087	Zinc-coordinating DNA-binding domains{2}	C2H2 zinc finger factors{2.3}	3.19e-36	1	#N/A	#N/A	#N/A
773	PEAKS038344	KLF4	ENSMUSG00000003032	Zinc-coordinating DNA-binding domains{2}	C2H2 zinc finger factors{2.3}	2.58e-121	6.36e-08	MA1107.2	JASPAR	KLF9
774	PEAKS039877	KLF4	ENSMUSG00000003032	Zinc-coordinating DNA-binding domains{2}	C2H2 zinc finger factors{2.3}	4.1e-39	1	#N/A	#N/A	#N/A
775	PEAKS036343	KMT2B	ENSMUSG00000006307	Zinc-coordinating DNA-binding domains{2}	CXXC zinc finger factors{2.6}	1	1	0	JASPAR	NA
776	PEAKS036344	KMT2B	ENSMUSG00000006307	Zinc-coordinating DNA-binding domains{2}	CXXC zinc finger factors{2.6}	1	1	0	JASPAR	NA
777	PEAKS036345	KMT2B	ENSMUSG00000006307	Zinc-coordinating DNA-binding domains{2}	CXXC zinc finger factors{2.6}	1	1	0	JASPAR	NA
778	PEAKS036346	KMT2B	ENSMUSG00000006307	Zinc-coordinating DNA-binding domains{2}	CXXC zinc finger factors{2.6}	1	1	0	JASPAR	NA
779	PEAKS036347	KMT2B	ENSMUSG00000006307	Zinc-coordinating DNA-binding domains{2}	CXXC zinc finger factors{2.6}	1	1	0	JASPAR	NA
780	PEAKS036348	KMT2B	ENSMUSG00000006307	Zinc-coordinating DNA-binding domains{2}	CXXC zinc finger factors{2.6}	1	1	0	JASPAR	NA
781	PEAKS036376	KMT2B	ENSMUSG00000006307	Zinc-coordinating DNA-binding domains{2}	CXXC zinc finger factors{2.6}	1	1	0	JASPAR	NA
782	PEAKS036377	KMT2B	ENSMUSG00000006307	Zinc-coordinating DNA-binding domains{2}	CXXC zinc finger factors{2.6}	1	1	0	JASPAR	NA
783	PEAKS039730	KMT2B	ENSMUSG00000006307	Zinc-coordinating DNA-binding domains{2}	CXXC zinc finger factors{2.6}	1	1	0	JASPAR	NA
784	PEAKS039803	KMT2B	ENSMUSG00000006307	Zinc-coordinating DNA-binding domains{2}	CXXC zinc finger factors{2.6}	1	1	0	JASPAR	NA
785	PEAKS039804	KMT2B	ENSMUSG00000006307	Zinc-coordinating DNA-binding domains{2}	CXXC zinc finger factors{2.6}	1	1	0	JASPAR	NA
786	PEAKS042178	LEF1	ENSMUSG00000027985	Other all-alpha-helical DNA-binding domains{4}	High-mobility group (HMG) domain factors{4.1}	4.87e-58	0.855	MA0769.2	JASPAR	TCF7
787	PEAKS054995	LEF1	ENSMUSG00000027985	Other all-alpha-helical DNA-binding domains{4}	High-mobility group (HMG) domain factors{4.1}	3.25e-298	1.77e-14	MA0523.1	JASPAR	TCF7L2
788	PEAKS039247	LHX2	ENSMUSG00000000247	Helix-turn-helix domains{3}	Homeo domain factors{3.1}	2.18e-218	1.31e-06	MA0702.2	JASPAR	LMX1A
789	PEAKS049705	LHX2	ENSMUSG00000000247	Helix-turn-helix domains{3}	Homeo domain factors{3.1}	6.04e-302	9.06e-07	MA0701.2	JASPAR	LHX9
790	PEAKS049706	LHX2	ENSMUSG00000000247	Helix-turn-helix domains{3}	Homeo domain factors{3.1}	2.42e-211	1.02e-05	MA0701.2	JASPAR	LHX9
791	PEAKS039229	LHX6	ENSMUSG00000026890	Helix-turn-helix domains{3}	Homeo domain factors{3.1}	3.23e-268	0.000423	MA1518.2	JASPAR	LHX1
792	PEAKS036502	MAF	ENSMUSG00000055435	Basic domains{1}	Basic leucine zipper factors (bZIP){1.1}	3.47e-191	2.09e-09	MA0117.2	JASPAR	MAFB
793	PEAKS036503	MAF	ENSMUSG00000055435	Basic domains{1}	Basic leucine zipper factors (bZIP){1.1}	5.54e-200	3.55e-11	MA1520.1	JASPAR	MAF
794	PEAKS041057	MAF	ENSMUSG00000055435	Basic domains{1}	Basic leucine zipper factors (bZIP){1.1}	6.83e-154	4.3e-07	MA0496.3	JASPAR	MAFK
795	PEAKS041058	MAF	ENSMUSG00000055435	Basic domains{1}	Basic leucine zipper factors (bZIP){1.1}	3.7e-150	1.12e-10	MA0495.3	JASPAR	MAFF
796	PEAKS038652	MAFB	ENSMUSG00000074622	Basic domains{1}	Basic leucine zipper factors (bZIP){1.1}	3.84e-255	3.55e-06	MA0117.2	JASPAR	MAFB
797	PEAKS038653	MAFB	ENSMUSG00000074622	Basic domains{1}	Basic leucine zipper factors (bZIP){1.1}	8.42e-269	6.85e-06	MA0495.3	JASPAR	MAFF
798	PEAKS035880	MAFF	ENSMUSG00000042622	Basic domains{1}	Basic leucine zipper factors (bZIP){1.1}	0	3.73e-10	MA1521.1	JASPAR	MAFA
799	PEAKS035881	MAFF	ENSMUSG00000042622	Basic domains{1}	Basic leucine zipper factors (bZIP){1.1}	0	2.37e-13	MA1521.1	JASPAR	MAFA
800	PEAKS035882	MAFF	ENSMUSG00000042622	Basic domains{1}	Basic leucine zipper factors (bZIP){1.1}	0	1.42e-12	MA1521.1	JASPAR	MAFA
801	PEAKS035883	MAFF	ENSMUSG00000042622	Basic domains{1}	Basic leucine zipper factors (bZIP){1.1}	0	4.37e-13	MA1521.1	JASPAR	MAFA
802	PEAKS038870	MAFG	ENSMUSG00000051510	Basic domains{1}	Basic leucine zipper factors (bZIP){1.1}	0	2.26e-10	MA1521.1	JASPAR	MAFA
803	PEAKS038871	MAFG	ENSMUSG00000051510	Basic domains{1}	Basic leucine zipper factors (bZIP){1.1}	0	2.5e-12	MA1521.1	JASPAR	MAFA
804	PEAKS040348	MAFK	ENSMUSG00000018143	Basic domains{1}	Basic leucine zipper factors (bZIP){1.1}	0	4.27e-10	MA0496.3	JASPAR	MAFK
805	PEAKS035467	MAX	ENSMUSG00000059436	Basic domains{1}	Basic helix-loop-helix factors (bHLH){1.2}	6.49e-192	6.2e-06	MA0058.3	JASPAR	MAX
806	PEAKS049931	MBD1	ENSMUSG00000024561	Zinc-coordinating DNA-binding domains{2}	CXXC zinc finger factors{2.6}	1	1	0	JASPAR	NA
807	PEAKS052831	MECP2	ENSMUSG00000031393	Zinc-coordinating DNA-binding domains{2}	CXXC zinc finger factors{2.6}	1	1	0	JASPAR	NA
808	PEAKS052832	MECP2	ENSMUSG00000031393	Zinc-coordinating DNA-binding domains{2}	CXXC zinc finger factors{2.6}	1	1	0	JASPAR	NA
809	PEAKS053153	MECP2	ENSMUSG00000031393	Zinc-coordinating DNA-binding domains{2}	CXXC zinc finger factors{2.6}	1	1	0	JASPAR	NA
810	PEAKS053154	MECP2	ENSMUSG00000031393	Zinc-coordinating DNA-binding domains{2}	CXXC zinc finger factors{2.6}	1	1	0	JASPAR	NA
811	PEAKS055122	MECP2	ENSMUSG00000031393	Zinc-coordinating DNA-binding domains{2}	CXXC zinc finger factors{2.6}	1	1	0	JASPAR	NA
812	PEAKS055123	MECP2	ENSMUSG00000031393	Zinc-coordinating DNA-binding domains{2}	CXXC zinc finger factors{2.6}	1	1	0	JASPAR	NA
813	PEAKS037872	MEF2A	ENSMUSG00000030557	α-Helices exposed by beta-structures{5}	MADS box factors{5.1}	0	5.83e-12	MA0052.4	JASPAR	MEF2A
814	PEAKS037873	MEF2A	ENSMUSG00000030557	α-Helices exposed by beta-structures{5}	MADS box factors{5.1}	0	2.62e-12	MA0052.4	JASPAR	MEF2A
815	PEAKS037870	MEF2C	ENSMUSG00000005583	α-Helices exposed by beta-structures{5}	MADS box factors{5.1}	6.39e-228	1.85e-11	MA0052.4	JASPAR	MEF2A
816	PEAKS037871	MEF2C	ENSMUSG00000005583	α-Helices exposed by beta-structures{5}	MADS box factors{5.1}	7.05e-232	8.59e-13	MA0052.4	JASPAR	MEF2A
817	PEAKS055083	MEF2C	ENSMUSG00000005583	α-Helices exposed by beta-structures{5}	MADS box factors{5.1}	5e-224	5.57e-09	MA0052.4	JASPAR	MEF2A
818	PEAKS057466	MEF2C	ENSMUSG00000005583	α-Helices exposed by beta-structures{5}	MADS box factors{5.1}	8.4e-224	7.9e-12	MA0497.1	JASPAR	MEF2C
819	PEAKS057467	MEF2C	ENSMUSG00000005583	α-Helices exposed by beta-structures{5}	MADS box factors{5.1}	1.11e-219	3.24e-13	MA0497.1	JASPAR	MEF2C
820	PEAKS057468	MEF2C	ENSMUSG00000005583	α-Helices exposed by beta-structures{5}	MADS box factors{5.1}	3.85e-190	2.45e-13	MA0497.1	JASPAR	MEF2C
821	PEAKS057469	MEF2C	ENSMUSG00000005583	α-Helices exposed by beta-structures{5}	MADS box factors{5.1}	5.82e-205	2.07e-12	MA0497.1	JASPAR	MEF2C
822	PEAKS057475	MEF2C	ENSMUSG00000005583	α-Helices exposed by beta-structures{5}	MADS box factors{5.1}	5.22e-171	6.78e-10	MA0497.1	JASPAR	MEF2C
823	PEAKS037447	MEF2D	ENSMUSG00000001419	α-Helices exposed by beta-structures{5}	MADS box factors{5.1}	0	1.22e-09	MA0660.1	JASPAR	MEF2B
824	PEAKS037448	MEF2D	ENSMUSG00000001419	α-Helices exposed by beta-structures{5}	MADS box factors{5.1}	0	6.11e-10	MA0660.1	JASPAR	MEF2B
825	PEAKS058108	MEF2D	ENSMUSG00000001419	α-Helices exposed by beta-structures{5}	MADS box factors{5.1}	0	2.86e-14	MA0497.1	JASPAR	MEF2C
826	PEAKS058109	MEF2D	ENSMUSG00000001419	α-Helices exposed by beta-structures{5}	MADS box factors{5.1}	0	1.19e-10	MA0052.4	JASPAR	MEF2A
827	PEAKS035335	MYB	ENSMUSG00000019982	Helix-turn-helix domains{3}	Tryptophan cluster factors{3.5}	1.59e-80	2.15e-05	MA0100.3	JASPAR	MYB
828	PEAKS035584	MYBL1	ENSMUSG00000025912	Helix-turn-helix domains{3}	Tryptophan cluster factors{3.5}	1.52e-93	0.000616	MA0100.3	JASPAR	MYB
829	PEAKS040028	MYBL1	ENSMUSG00000025912	Helix-turn-helix domains{3}	Tryptophan cluster factors{3.5}	9.48e-103	0.000182	MA0100.3	JASPAR	MYB
830	PEAKS035964	MYC	ENSMUSG00000022346	Basic domains{1}	Basic helix-loop-helix factors (bHLH){1.2}	7.58e-84	9.68e-06	MA0058.3	JASPAR	MAX
831	PEAKS036488	MYC	ENSMUSG00000022346	Basic domains{1}	Basic helix-loop-helix factors (bHLH){1.2}	2.62e-305	2.4e-09	MA0147.3	JASPAR	MYC
832	PEAKS036666	MYC	ENSMUSG00000022346	Basic domains{1}	Basic helix-loop-helix factors (bHLH){1.2}	2.35e-181	4.47e-07	MA0147.3	JASPAR	MYC
833	PEAKS039097	MYC	ENSMUSG00000022346	Basic domains{1}	Basic helix-loop-helix factors (bHLH){1.2}	4.74e-95	8.14e-06	MA0104.4	JASPAR	MYCN
834	PEAKS040310	MYC	ENSMUSG00000022346	Basic domains{1}	Basic helix-loop-helix factors (bHLH){1.2}	5.52e-140	9.54e-06	MA0104.4	JASPAR	MYCN
835	PEAKS040311	MYC	ENSMUSG00000022346	Basic domains{1}	Basic helix-loop-helix factors (bHLH){1.2}	8.83e-212	7.63e-06	MA0104.4	JASPAR	MYCN
836	PEAKS040312	MYC	ENSMUSG00000022346	Basic domains{1}	Basic helix-loop-helix factors (bHLH){1.2}	7.73e-212	8.13e-06	MA0147.3	JASPAR	MYC
837	PEAKS040313	MYC	ENSMUSG00000022346	Basic domains{1}	Basic helix-loop-helix factors (bHLH){1.2}	2.62e-190	4.08e-07	MA0104.4	JASPAR	MYCN
838	PEAKS040314	MYC	ENSMUSG00000022346	Basic domains{1}	Basic helix-loop-helix factors (bHLH){1.2}	2.33e-211	7.63e-06	MA0058.3	JASPAR	MAX
839	PEAKS041116	MYC	ENSMUSG00000022346	Basic domains{1}	Basic helix-loop-helix factors (bHLH){1.2}	1.72e-106	0.00271	MA0622.1	JASPAR	MLXIP
840	PEAKS042251	MYC	ENSMUSG00000022346	Basic domains{1}	Basic helix-loop-helix factors (bHLH){1.2}	9e-223	2.65e-09	MA0147.3	JASPAR	MYC
841	PEAKS042252	MYC	ENSMUSG00000022346	Basic domains{1}	Basic helix-loop-helix factors (bHLH){1.2}	7.63e-276	1.86e-07	MA0147.3	JASPAR	MYC
842	PEAKS042253	MYC	ENSMUSG00000022346	Basic domains{1}	Basic helix-loop-helix factors (bHLH){1.2}	1.35e-264	9.54e-06	MA0058.3	JASPAR	MAX
843	PEAKS049409	MYC	ENSMUSG00000022346	Basic domains{1}	Basic helix-loop-helix factors (bHLH){1.2}	1.9e-280	7.63e-06	MA0104.4	JASPAR	MYCN
844	PEAKS049504	MYC	ENSMUSG00000022346	Basic domains{1}	Basic helix-loop-helix factors (bHLH){1.2}	6.71e-188	0.0811	MA0828.2	JASPAR	SREBF2
845	PEAKS049505	MYC	ENSMUSG00000022346	Basic domains{1}	Basic helix-loop-helix factors (bHLH){1.2}	5.5e-29	0.281	MA1108.2	JASPAR	MXI1
846	PEAKS049508	MYC	ENSMUSG00000022346	Basic domains{1}	Basic helix-loop-helix factors (bHLH){1.2}	6.07e-87	0.042	MA0147.3	JASPAR	MYC
847	PEAKS049509	MYC	ENSMUSG00000022346	Basic domains{1}	Basic helix-loop-helix factors (bHLH){1.2}	7.5e-192	0.00749	MA0526.4	JASPAR	USF2
848	PEAKS057309	MYC	ENSMUSG00000022346	Basic domains{1}	Basic helix-loop-helix factors (bHLH){1.2}	6.49e-147	0.419	MA1108.2	JASPAR	MXI1
849	PEAKS035495	MYOD1	ENSMUSG00000009471	Basic domains{1}	Basic helix-loop-helix factors (bHLH){1.2}	0	4.69e-08	MA0500.2	JASPAR	MYOG
850	PEAKS035690	MYOD1	ENSMUSG00000009471	Basic domains{1}	Basic helix-loop-helix factors (bHLH){1.2}	7.78e-117	1.91e-06	MA0500.2	JASPAR	MYOG
851	PEAKS035691	MYOD1	ENSMUSG00000009471	Basic domains{1}	Basic helix-loop-helix factors (bHLH){1.2}	0	8.94e-10	MA0816.1	JASPAR	ASCL2
852	PEAKS036373	MYOD1	ENSMUSG00000009471	Basic domains{1}	Basic helix-loop-helix factors (bHLH){1.2}	0	4.06e-11	MA0500.2	JASPAR	MYOG
853	PEAKS036714	MYOD1	ENSMUSG00000009471	Basic domains{1}	Basic helix-loop-helix factors (bHLH){1.2}	0	1.56e-09	MA0816.1	JASPAR	ASCL2
854	PEAKS036729	MYOD1	ENSMUSG00000009471	Basic domains{1}	Basic helix-loop-helix factors (bHLH){1.2}	0	4.85e-09	MA0816.1	JASPAR	ASCL2
855	PEAKS037024	MYOD1	ENSMUSG00000009471	Basic domains{1}	Basic helix-loop-helix factors (bHLH){1.2}	0	2.03e-09	MA0816.1	JASPAR	ASCL2
856	PEAKS055156	MYOD1	ENSMUSG00000009471	Basic domains{1}	Basic helix-loop-helix factors (bHLH){1.2}	0	1.06e-09	MA0816.1	JASPAR	ASCL2
857	PEAKS055157	MYOD1	ENSMUSG00000009471	Basic domains{1}	Basic helix-loop-helix factors (bHLH){1.2}	0	3.05e-06	MA0816.1	JASPAR	ASCL2
858	PEAKS055159	MYOD1	ENSMUSG00000009471	Basic domains{1}	Basic helix-loop-helix factors (bHLH){1.2}	0	3.78e-08	MA0500.2	JASPAR	MYOG
859	PEAKS055161	MYOD1	ENSMUSG00000009471	Basic domains{1}	Basic helix-loop-helix factors (bHLH){1.2}	0	6.21e-10	MA0816.1	JASPAR	ASCL2
860	PEAKS059241	MYOD1	ENSMUSG00000009471	Basic domains{1}	Basic helix-loop-helix factors (bHLH){1.2}	0	3.23e-09	MA0816.1	JASPAR	ASCL2
861	PEAKS059242	MYOD1	ENSMUSG00000009471	Basic domains{1}	Basic helix-loop-helix factors (bHLH){1.2}	0	9.66e-10	MA0816.1	JASPAR	ASCL2
862	PEAKS035509	MYOG	ENSMUSG00000026459	Basic domains{1}	Basic helix-loop-helix factors (bHLH){1.2}	0	1.91e-06	MA1641.1	JASPAR	MYF5
863	PEAKS036746	MYOG	ENSMUSG00000026459	Basic domains{1}	Basic helix-loop-helix factors (bHLH){1.2}	0	1.91e-06	MA1100.2	JASPAR	ASCL1
864	PEAKS036759	MYOG	ENSMUSG00000026459	Basic domains{1}	Basic helix-loop-helix factors (bHLH){1.2}	0	4.92e-12	MA0500.2	JASPAR	MYOG
865	PEAKS037025	MYOG	ENSMUSG00000026459	Basic domains{1}	Basic helix-loop-helix factors (bHLH){1.2}	0	5.68e-13	MA0500.2	JASPAR	MYOG
866	PEAKS038399	NANOG	ENSMUSG00000012396	Helix-turn-helix domains{3}	Homeo domain factors{3.1}	1	1	0	JASPAR	NA
867	PEAKS038400	NANOG	ENSMUSG00000012396	Helix-turn-helix domains{3}	Homeo domain factors{3.1}	1	1	0	JASPAR	NA
868	PEAKS036598	NCOA2	ENSMUSG00000005886	Basic domains{1}	Basic helix-loop-helix factors (bHLH){1.2}	1	1	0	JASPAR	NA
869	PEAKS039543	NCOA2	ENSMUSG00000005886	Basic domains{1}	Basic helix-loop-helix factors (bHLH){1.2}	1	1	0	JASPAR	NA
870	PEAKS039544	NCOA2	ENSMUSG00000005886	Basic domains{1}	Basic helix-loop-helix factors (bHLH){1.2}	1	1	0	JASPAR	NA
871	PEAKS039545	NCOA2	ENSMUSG00000005886	Basic domains{1}	Basic helix-loop-helix factors (bHLH){1.2}	1	1	0	JASPAR	NA
872	PEAKS039576	NEUROD1	ENSMUSG00000034701	Basic domains{1}	Basic helix-loop-helix factors (bHLH){1.2}	1.8e-294	7.63e-11	MA0668.2	JASPAR	NEUROD2
873	PEAKS037963	NEUROD2	ENSMUSG00000038255	Basic domains{1}	Basic helix-loop-helix factors (bHLH){1.2}	1.58e-307	1.51e-07	MA1467.2	JASPAR	ATOH1
874	PEAKS037964	NEUROD2	ENSMUSG00000038255	Basic domains{1}	Basic helix-loop-helix factors (bHLH){1.2}	0	6.78e-12	MA1109.1	JASPAR	NEUROD1
875	PEAKS037965	NEUROD2	ENSMUSG00000038255	Basic domains{1}	Basic helix-loop-helix factors (bHLH){1.2}	2.27e-298	3.42e-09	MA1109.1	JASPAR	NEUROD1
876	PEAKS057246	NFATC1	ENSMUSG00000033016	Immunoglobulin fold{6}	Rel homology region (RHR) factors{6.1}	5.57e-15	1	#N/A	#N/A	#N/A
877	PEAKS037285	NFATC2	ENSMUSG00000027544	Immunoglobulin fold{6}	Rel homology region (RHR) factors{6.1}	3.82e-168	4.27e-07	MA0152.2	JASPAR	NFATC2
878	PEAKS036124	NFE2	ENSMUSG00000058794	Basic domains{1}	Basic leucine zipper factors (bZIP){1.1}	4.76e-235	2.87e-10	MA0150.2	JASPAR	NFE2L2
879	PEAKS036889	NFE2	ENSMUSG00000058794	Basic domains{1}	Basic leucine zipper factors (bZIP){1.1}	0	2.28e-10	MA0150.2	JASPAR	NFE2L2
880	PEAKS036890	NFE2	ENSMUSG00000058794	Basic domains{1}	Basic leucine zipper factors (bZIP){1.1}	0	2.37e-08	MA0150.2	JASPAR	NFE2L2
881	PEAKS038494	NFE2L2	ENSMUSG00000015839	Basic domains{1}	Basic leucine zipper factors (bZIP){1.1}	7.42e-236	3.4e-10	MA0150.2	JASPAR	NFE2L2
882	PEAKS038495	NFE2L2	ENSMUSG00000015839	Basic domains{1}	Basic leucine zipper factors (bZIP){1.1}	3.19e-299	8.14e-13	MA0150.2	JASPAR	NFE2L2
883	PEAKS038626	NFE2L2	ENSMUSG00000015839	Basic domains{1}	Basic leucine zipper factors (bZIP){1.1}	3.42e-284	1.14e-07	MA0150.2	JASPAR	NFE2L2
884	PEAKS038628	NFE2L2	ENSMUSG00000015839	Basic domains{1}	Basic leucine zipper factors (bZIP){1.1}	0	8.12e-20	MA0150.2	JASPAR	NFE2L2
885	PEAKS048772	NFE2L2	ENSMUSG00000015839	Basic domains{1}	Basic leucine zipper factors (bZIP){1.1}	1.49e-250	9.35e-10	MA0150.2	JASPAR	NFE2L2
886	PEAKS048773	NFE2L2	ENSMUSG00000015839	Basic domains{1}	Basic leucine zipper factors (bZIP){1.1}	1.38e-264	1.13e-13	MA0150.2	JASPAR	NFE2L2
887	PEAKS050707	NFE2L2	ENSMUSG00000015839	Basic domains{1}	Basic leucine zipper factors (bZIP){1.1}	1.14e-151	1.31e-06	MA0834.1	JASPAR	ATF7
888	PEAKS050708	NFE2L2	ENSMUSG00000015839	Basic domains{1}	Basic leucine zipper factors (bZIP){1.1}	0	1.33e-10	MA0150.2	JASPAR	NFE2L2
889	PEAKS039228	NKX2-1	ENSMUSG00000001496	Helix-turn-helix domains{3}	Homeo domain factors{3.1}	8.69e-104	1.05e-09	MA1645.1	JASPAR	NKX2-2
890	PEAKS059308	NKX2-2	ENSMUSG00000027434	Helix-turn-helix domains{3}	Homeo domain factors{3.1}	2.49e-34	0.00461	MA1645.1	JASPAR	NKX2-2
891	PEAKS059309	NKX2-2	ENSMUSG00000027434	Helix-turn-helix domains{3}	Homeo domain factors{3.1}	2.59e-60	4.93e-06	MA1645.1	JASPAR	NKX2-2
892	PEAKS036920	NKX2-5	ENSMUSG00000015579	Helix-turn-helix domains{3}	Homeo domain factors{3.1}	4.99e-106	0.088	MA2003.1	JASPAR	NKX2-4
893	PEAKS036086	NKX6-1	ENSMUSG00000035187	Helix-turn-helix domains{3}	Homeo domain factors{3.1}	7.64e-123	4.28e-07	MA1530.1	JASPAR	NKX6-3
894	PEAKS035194	NR1D1	ENSMUSG00000020889	Zinc-coordinating DNA-binding domains{2}	Nuclear receptors with C4 zinc fingers{2.1}	3.54e-102	1.57e-06	MA1150.1	JASPAR	RORB
895	PEAKS035783	NR1D1	ENSMUSG00000020889	Zinc-coordinating DNA-binding domains{2}	Nuclear receptors with C4 zinc fingers{2.1}	1.24e-45	0.215	MA0859.1	JASPAR	RARG
896	PEAKS037977	NR1D1	ENSMUSG00000020889	Zinc-coordinating DNA-binding domains{2}	Nuclear receptors with C4 zinc fingers{2.1}	0.000235	1	#N/A	#N/A	#N/A
897	PEAKS037978	NR1D1	ENSMUSG00000020889	Zinc-coordinating DNA-binding domains{2}	Nuclear receptors with C4 zinc fingers{2.1}	8.59e-06	1	#N/A	#N/A	#N/A
898	PEAKS037987	NR1D1	ENSMUSG00000020889	Zinc-coordinating DNA-binding domains{2}	Nuclear receptors with C4 zinc fingers{2.1}	1.44e-72	1.11e-07	MA1151.1	JASPAR	RORC
899	PEAKS037991	NR1D1	ENSMUSG00000020889	Zinc-coordinating DNA-binding domains{2}	Nuclear receptors with C4 zinc fingers{2.1}	6.61e-85	0.0934	MA1969.1	JASPAR	THRA
900	PEAKS038537	NR1D1	ENSMUSG00000020889	Zinc-coordinating DNA-binding domains{2}	Nuclear receptors with C4 zinc fingers{2.1}	1.58e-166	4.15e-07	MA0072.1	JASPAR	RORA
901	PEAKS038982	NR1D1	ENSMUSG00000020889	Zinc-coordinating DNA-binding domains{2}	Nuclear receptors with C4 zinc fingers{2.1}	7.66e-113	2.78e-08	MA1151.1	JASPAR	RORC
902	PEAKS057427	NR1D1	ENSMUSG00000020889	Zinc-coordinating DNA-binding domains{2}	Nuclear receptors with C4 zinc fingers{2.1}	5.59e-182	1.52e-10	MA1531.1	JASPAR	NR1D1
903	PEAKS057428	NR1D1	ENSMUSG00000020889	Zinc-coordinating DNA-binding domains{2}	Nuclear receptors with C4 zinc fingers{2.1}	2.94e-179	3.59e-08	MA0072.1	JASPAR	RORA
904	PEAKS057429	NR1D1	ENSMUSG00000020889	Zinc-coordinating DNA-binding domains{2}	Nuclear receptors with C4 zinc fingers{2.1}	1.23e-200	5.35e-08	MA0072.1	JASPAR	RORA
905	PEAKS057430	NR1D1	ENSMUSG00000020889	Zinc-coordinating DNA-binding domains{2}	Nuclear receptors with C4 zinc fingers{2.1}	2.95e-204	6.26e-09	MA0072.1	JASPAR	RORA
906	PEAKS057908	NR1D1	ENSMUSG00000020889	Zinc-coordinating DNA-binding domains{2}	Nuclear receptors with C4 zinc fingers{2.1}	5.96e-05	1	#N/A	#N/A	#N/A
907	PEAKS035784	NR1D2	ENSMUSG00000021775	Zinc-coordinating DNA-binding domains{2}	Nuclear receptors with C4 zinc fingers{2.1}	7.24e-50	0.0382	MA0071.1	JASPAR	RORA
908	PEAKS042375	NR1H2	ENSMUSG00000060601	Zinc-coordinating DNA-binding domains{2}	Nuclear receptors with C4 zinc fingers{2.1}	2.92e-129	9.81e-10	MA1969.1	JASPAR	THRA
909	PEAKS039922	NR1H3	ENSMUSG00000002108	Zinc-coordinating DNA-binding domains{2}	Nuclear receptors with C4 zinc fingers{2.1}	1.13e-119	1	0	JASPAR	NA
910	PEAKS039923	NR1H3	ENSMUSG00000002108	Zinc-coordinating DNA-binding domains{2}	Nuclear receptors with C4 zinc fingers{2.1}	1.24e-164	1	0	JASPAR	NA
911	PEAKS039924	NR1H3	ENSMUSG00000002108	Zinc-coordinating DNA-binding domains{2}	Nuclear receptors with C4 zinc fingers{2.1}	1.99e-87	1	0	JASPAR	NA
912	PEAKS039925	NR1H3	ENSMUSG00000002108	Zinc-coordinating DNA-binding domains{2}	Nuclear receptors with C4 zinc fingers{2.1}	2.3e-112	1	0	JASPAR	NA
913	PEAKS039926	NR1H3	ENSMUSG00000002108	Zinc-coordinating DNA-binding domains{2}	Nuclear receptors with C4 zinc fingers{2.1}	5.47e-59	1	#N/A	#N/A	#N/A
914	PEAKS042374	NR1H3	ENSMUSG00000002108	Zinc-coordinating DNA-binding domains{2}	Nuclear receptors with C4 zinc fingers{2.1}	6.29e-219	1	0	JASPAR	NA
915	PEAKS059123	NR1H3	ENSMUSG00000002108	Zinc-coordinating DNA-binding domains{2}	Nuclear receptors with C4 zinc fingers{2.1}	1.87e-123	1	0	JASPAR	NA
916	PEAKS059124	NR1H3	ENSMUSG00000002108	Zinc-coordinating DNA-binding domains{2}	Nuclear receptors with C4 zinc fingers{2.1}	5.44e-47	1	#N/A	#N/A	#N/A
917	PEAKS059125	NR1H3	ENSMUSG00000002108	Zinc-coordinating DNA-binding domains{2}	Nuclear receptors with C4 zinc fingers{2.1}	2.93e-63	1	#N/A	#N/A	#N/A
918	PEAKS059126	NR1H3	ENSMUSG00000002108	Zinc-coordinating DNA-binding domains{2}	Nuclear receptors with C4 zinc fingers{2.1}	6.25e-53	1	#N/A	#N/A	#N/A
919	PEAKS036235	NR2F2	ENSMUSG00000030551	Zinc-coordinating DNA-binding domains{2}	Nuclear receptors with C4 zinc fingers{2.1}	4.4e-104	0.376	MA1538.1	JASPAR	NR2F1
920	PEAKS036207	NR3C1	ENSMUSG00000024431	Zinc-coordinating DNA-binding domains{2}	Nuclear receptors with C4 zinc fingers{2.1}	5.86e-24	1	#N/A	#N/A	#N/A
921	PEAKS036209	NR3C1	ENSMUSG00000024431	Zinc-coordinating DNA-binding domains{2}	Nuclear receptors with C4 zinc fingers{2.1}	7.15e-301	2.77e-10	MA0007.3	JASPAR	AR
922	PEAKS036211	NR3C1	ENSMUSG00000024431	Zinc-coordinating DNA-binding domains{2}	Nuclear receptors with C4 zinc fingers{2.1}	0	3.54e-11	MA0007.3	JASPAR	AR
923	PEAKS036212	NR3C1	ENSMUSG00000024431	Zinc-coordinating DNA-binding domains{2}	Nuclear receptors with C4 zinc fingers{2.1}	0	1.55e-10	MA0007.3	JASPAR	AR
924	PEAKS036214	NR3C1	ENSMUSG00000024431	Zinc-coordinating DNA-binding domains{2}	Nuclear receptors with C4 zinc fingers{2.1}	6.34e-301	4.99e-10	MA0727.1	JASPAR	NR3C2
925	PEAKS036215	NR3C1	ENSMUSG00000024431	Zinc-coordinating DNA-binding domains{2}	Nuclear receptors with C4 zinc fingers{2.1}	1.54e-43	1	#N/A	#N/A	#N/A
926	PEAKS036216	NR3C1	ENSMUSG00000024431	Zinc-coordinating DNA-binding domains{2}	Nuclear receptors with C4 zinc fingers{2.1}	2.7e-270	3.97e-11	MA0727.1	JASPAR	NR3C2
927	PEAKS037265	NR3C1	ENSMUSG00000024431	Zinc-coordinating DNA-binding domains{2}	Nuclear receptors with C4 zinc fingers{2.1}	1.43e-29	1	#N/A	#N/A	#N/A
928	PEAKS037266	NR3C1	ENSMUSG00000024431	Zinc-coordinating DNA-binding domains{2}	Nuclear receptors with C4 zinc fingers{2.1}	1.37e-35	1	#N/A	#N/A	#N/A
929	PEAKS037267	NR3C1	ENSMUSG00000024431	Zinc-coordinating DNA-binding domains{2}	Nuclear receptors with C4 zinc fingers{2.1}	6.18e-26	0.173	MA0258.2	JASPAR	ESR2
930	PEAKS037268	NR3C1	ENSMUSG00000024431	Zinc-coordinating DNA-binding domains{2}	Nuclear receptors with C4 zinc fingers{2.1}	1.3e-168	1.1e-10	MA0727.1	JASPAR	NR3C2
931	PEAKS037269	NR3C1	ENSMUSG00000024431	Zinc-coordinating DNA-binding domains{2}	Nuclear receptors with C4 zinc fingers{2.1}	2.86e-144	5.29e-10	MA0727.1	JASPAR	NR3C2
932	PEAKS037270	NR3C1	ENSMUSG00000024431	Zinc-coordinating DNA-binding domains{2}	Nuclear receptors with C4 zinc fingers{2.1}	0	1.58e-11	MA0007.3	JASPAR	AR
933	PEAKS037705	NR3C1	ENSMUSG00000024431	Zinc-coordinating DNA-binding domains{2}	Nuclear receptors with C4 zinc fingers{2.1}	2.48e-210	5.61e-10	MA0727.1	JASPAR	NR3C2
934	PEAKS037706	NR3C1	ENSMUSG00000024431	Zinc-coordinating DNA-binding domains{2}	Nuclear receptors with C4 zinc fingers{2.1}	0	9.75e-11	MA0727.1	JASPAR	NR3C2
935	PEAKS040015	NR3C1	ENSMUSG00000024431	Zinc-coordinating DNA-binding domains{2}	Nuclear receptors with C4 zinc fingers{2.1}	1.44e-176	5.28e-09	MA0727.1	JASPAR	NR3C2
936	PEAKS040016	NR3C1	ENSMUSG00000024431	Zinc-coordinating DNA-binding domains{2}	Nuclear receptors with C4 zinc fingers{2.1}	1.12e-127	3.19e-11	MA0727.1	JASPAR	NR3C2
937	PEAKS048675	NR3C1	ENSMUSG00000024431	Zinc-coordinating DNA-binding domains{2}	Nuclear receptors with C4 zinc fingers{2.1}	4.42e-225	7.19e-08	MA0727.1	JASPAR	NR3C2
938	PEAKS048677	NR3C1	ENSMUSG00000024431	Zinc-coordinating DNA-binding domains{2}	Nuclear receptors with C4 zinc fingers{2.1}	7.89e-180	3.65e-09	MA0007.3	JASPAR	AR
939	PEAKS050685	NR3C1	ENSMUSG00000024431	Zinc-coordinating DNA-binding domains{2}	Nuclear receptors with C4 zinc fingers{2.1}	2.03e-288	4.15e-11	MA0727.1	JASPAR	NR3C2
940	PEAKS050686	NR3C1	ENSMUSG00000024431	Zinc-coordinating DNA-binding domains{2}	Nuclear receptors with C4 zinc fingers{2.1}	2.92e-209	1.31e-10	MA0727.1	JASPAR	NR3C2
941	PEAKS038164	NR5A1	ENSMUSG00000026751	Zinc-coordinating DNA-binding domains{2}	Nuclear receptors with C4 zinc fingers{2.1}	0	4.26e-11	MA0505.2	JASPAR	NR5A2
942	PEAKS035220	NR5A2	ENSMUSG00000026398	Zinc-coordinating DNA-binding domains{2}	Nuclear receptors with C4 zinc fingers{2.1}	1.52e-286	2.95e-12	MA1540.2	JASPAR	NR5A1
943	PEAKS042291	OLIG2	ENSMUSG00000039830	Basic domains{1}	Basic helix-loop-helix factors (bHLH){1.2}	2.04e-102	1.91e-06	MA1472.2	JASPAR	BHLHA15
944	PEAKS049624	OSR1	ENSMUSG00000048387	Zinc-coordinating DNA-binding domains{2}	C2H2 zinc finger factors{2.3}	1.32e-15	1	#N/A	#N/A	#N/A
945	PEAKS036637	OTX2	ENSMUSG00000021848	Helix-turn-helix domains{3}	Homeo domain factors{3.1}	1.21e-228	2.95e-09	MA0712.2	JASPAR	OTX2
946	PEAKS036638	OTX2	ENSMUSG00000021848	Helix-turn-helix domains{3}	Homeo domain factors{3.1}	4.72e-251	3.93e-06	MA0467.2	JASPAR	CRX
947	PEAKS052804	OTX2	ENSMUSG00000021848	Helix-turn-helix domains{3}	Homeo domain factors{3.1}	2.65e-139	1.51e-07	MA0712.2	JASPAR	OTX2
948	PEAKS052806	OTX2	ENSMUSG00000021848	Helix-turn-helix domains{3}	Homeo domain factors{3.1}	4.82e-192	4.41e-06	MA0891.1	JASPAR	GSC2
949	PEAKS036574	OVOL2	ENSMUSG00000037279	Zinc-coordinating DNA-binding domains{2}	C2H2 zinc finger factors{2.3}	0	8.9e-11	MA1545.1	JASPAR	OVOL2
950	PEAKS035556	PAX5	ENSMUSG00000014030	Helix-turn-helix domains{3}	Paired box factors{3.2}	1.22e-56	3.2e-05	MA0067.2	JASPAR	PAX2
951	PEAKS035557	PAX5	ENSMUSG00000014030	Helix-turn-helix domains{3}	Paired box factors{3.2}	4.57e-55	1	#N/A	#N/A	#N/A
952	PEAKS039248	PAX5	ENSMUSG00000014030	Helix-turn-helix domains{3}	Paired box factors{3.2}	4.53e-100	9.49e-06	MA0781.1	JASPAR	PAX9
953	PEAKS039249	PAX5	ENSMUSG00000014030	Helix-turn-helix domains{3}	Paired box factors{3.2}	5.23e-96	7.56e-06	MA0014.3	JASPAR	PAX5
954	PEAKS048635	PAX5	ENSMUSG00000014030	Helix-turn-helix domains{3}	Paired box factors{3.2}	4.53e-89	2.31e-07	MA0014.3	JASPAR	PAX5
955	PEAKS048636	PAX5	ENSMUSG00000014030	Helix-turn-helix domains{3}	Paired box factors{3.2}	8.61e-160	4.19e-05	MA0067.2	JASPAR	PAX2
956	PEAKS049203	PAX5	ENSMUSG00000014030	Helix-turn-helix domains{3}	Paired box factors{3.2}	8.86e-129	2.78e-07	MA0067.2	JASPAR	PAX2
957	PEAKS037886	PAX6	ENSMUSG00000027168	Helix-turn-helix domains{3}	Paired box factors{3.2}	2.16e-110	1.51e-08	MA0069.1	JASPAR	PAX6
958	PEAKS037887	PAX6	ENSMUSG00000027168	Helix-turn-helix domains{3}	Paired box factors{3.2}	4.06e-121	9e-08	MA0069.1	JASPAR	PAX6
959	PEAKS035694	PAX7	ENSMUSG00000028736	Helix-turn-helix domains{3}	Paired box factors{3.2}	0	2.83e-09	MA0780.1	JASPAR	PAX3
960	PEAKS038950	PBX1	ENSMUSG00000052534	Helix-turn-helix domains{3}	Homeo domain factors{3.1}	9.2e-170	0.00257	MA0070.1	JASPAR	PBX1
961	PEAKS038980	PBX1	ENSMUSG00000052534	Helix-turn-helix domains{3}	Homeo domain factors{3.1}	5.8e-173	0.00211	MA0070.1	JASPAR	PBX1
962	PEAKS049655	PDX1	ENSMUSG00000029644	Helix-turn-helix domains{3}	Homeo domain factors{3.1}	8.72e-30	0.00809	MA1498.2	JASPAR	HOXA7
963	PEAKS035795	PGR	ENSMUSG00000031870	Zinc-coordinating DNA-binding domains{2}	Nuclear receptors with C4 zinc fingers{2.1}	1	1	0	JASPAR	NA
964	PEAKS035796	PGR	ENSMUSG00000031870	Zinc-coordinating DNA-binding domains{2}	Nuclear receptors with C4 zinc fingers{2.1}	1	1	0	JASPAR	NA
965	PEAKS036145	PGR	ENSMUSG00000031870	Zinc-coordinating DNA-binding domains{2}	Nuclear receptors with C4 zinc fingers{2.1}	1	1	0	JASPAR	NA
966	PEAKS038873	PGR	ENSMUSG00000031870	Zinc-coordinating DNA-binding domains{2}	Nuclear receptors with C4 zinc fingers{2.1}	1	1	0	JASPAR	NA
967	PEAKS050639	PGR	ENSMUSG00000031870	Zinc-coordinating DNA-binding domains{2}	Nuclear receptors with C4 zinc fingers{2.1}	1	1	0	JASPAR	NA
968	PEAKS050640	PGR	ENSMUSG00000031870	Zinc-coordinating DNA-binding domains{2}	Nuclear receptors with C4 zinc fingers{2.1}	1	1	0	JASPAR	NA
969	PEAKS057626	PGR	ENSMUSG00000031870	Zinc-coordinating DNA-binding domains{2}	Nuclear receptors with C4 zinc fingers{2.1}	1	1	0	JASPAR	NA
970	PEAKS035398	POU2F1	ENSMUSG00000026565	Helix-turn-helix domains{3}	Homeo domain factors{3.1}	1.04e-05	1	#N/A	#N/A	#N/A
971	PEAKS037836	POU2F1	ENSMUSG00000026565	Helix-turn-helix domains{3}	Homeo domain factors{3.1}	4.96e-10	1	#N/A	#N/A	#N/A
972	PEAKS037837	POU2F1	ENSMUSG00000026565	Helix-turn-helix domains{3}	Homeo domain factors{3.1}	7.07e-06	1	#N/A	#N/A	#N/A
973	PEAKS049292	POU2F3	ENSMUSG00000032015	Helix-turn-helix domains{3}	Homeo domain factors{3.1}	0	5.52e-08	MA0627.2	JASPAR	POU2F3
974	PEAKS036635	POU5F1	ENSMUSG00000024406	Helix-turn-helix domains{3}	Homeo domain factors{3.1}	0	1.45e-08	MA0786.1	JASPAR	POU3F1
975	PEAKS036636	POU5F1	ENSMUSG00000024406	Helix-turn-helix domains{3}	Homeo domain factors{3.1}	0	3.66e-07	MA1115.1	JASPAR	POU5F1
976	PEAKS039671	PPARA	ENSMUSG00000022383	Zinc-coordinating DNA-binding domains{2}	Nuclear receptors with C4 zinc fingers{2.1}	3.72e-247	1	0	JASPAR	NA
977	PEAKS039673	PPARA	ENSMUSG00000022383	Zinc-coordinating DNA-binding domains{2}	Nuclear receptors with C4 zinc fingers{2.1}	0	1	0	JASPAR	NA
978	PEAKS039675	PPARA	ENSMUSG00000022383	Zinc-coordinating DNA-binding domains{2}	Nuclear receptors with C4 zinc fingers{2.1}	1.95e-289	1	0	JASPAR	NA
979	PEAKS039677	PPARA	ENSMUSG00000022383	Zinc-coordinating DNA-binding domains{2}	Nuclear receptors with C4 zinc fingers{2.1}	3.33e-266	1	0	JASPAR	NA
980	PEAKS055023	PPARA	ENSMUSG00000022383	Zinc-coordinating DNA-binding domains{2}	Nuclear receptors with C4 zinc fingers{2.1}	7.8e-87	1	0	JASPAR	NA
981	PEAKS055024	PPARA	ENSMUSG00000022383	Zinc-coordinating DNA-binding domains{2}	Nuclear receptors with C4 zinc fingers{2.1}	3.93e-218	1	0	JASPAR	NA
982	PEAKS055025	PPARA	ENSMUSG00000022383	Zinc-coordinating DNA-binding domains{2}	Nuclear receptors with C4 zinc fingers{2.1}	3.25e-120	1	0	JASPAR	NA
983	PEAKS055026	PPARA	ENSMUSG00000022383	Zinc-coordinating DNA-binding domains{2}	Nuclear receptors with C4 zinc fingers{2.1}	1.62e-89	1	0	JASPAR	NA
984	PEAKS055027	PPARD	ENSMUSG00000002250	Zinc-coordinating DNA-binding domains{2}	Nuclear receptors with C4 zinc fingers{2.1}	9.9e-150	6.06e-09	MA1574.1	JASPAR	THRB
985	PEAKS055028	PPARD	ENSMUSG00000002250	Zinc-coordinating DNA-binding domains{2}	Nuclear receptors with C4 zinc fingers{2.1}	1.09e-140	1.22e-08	MA1574.1	JASPAR	THRB
986	PEAKS036102	PPARG	ENSMUSG00000000440	Zinc-coordinating DNA-binding domains{2}	Nuclear receptors with C4 zinc fingers{2.1}	5.95e-203	2.51e-07	MA1574.1	JASPAR	THRB
987	PEAKS036103	PPARG	ENSMUSG00000000440	Zinc-coordinating DNA-binding domains{2}	Nuclear receptors with C4 zinc fingers{2.1}	7.92e-240	1.38e-08	MA1574.1	JASPAR	THRB
988	PEAKS036104	PPARG	ENSMUSG00000000440	Zinc-coordinating DNA-binding domains{2}	Nuclear receptors with C4 zinc fingers{2.1}	8.8e-241	2.09e-07	MA1151.1	JASPAR	RORC
989	PEAKS037701	PPARG	ENSMUSG00000000440	Zinc-coordinating DNA-binding domains{2}	Nuclear receptors with C4 zinc fingers{2.1}	7.94e-194	1.74e-08	MA1574.1	JASPAR	THRB
990	PEAKS037702	PPARG	ENSMUSG00000000440	Zinc-coordinating DNA-binding domains{2}	Nuclear receptors with C4 zinc fingers{2.1}	9.58e-197	3.86e-06	MA1574.1	JASPAR	THRB
991	PEAKS037703	PPARG	ENSMUSG00000000440	Zinc-coordinating DNA-binding domains{2}	Nuclear receptors with C4 zinc fingers{2.1}	8.31e-213	2.63e-07	MA1574.1	JASPAR	THRB
992	PEAKS039024	PPARG	ENSMUSG00000000440	Zinc-coordinating DNA-binding domains{2}	Nuclear receptors with C4 zinc fingers{2.1}	4.7e-208	3.65e-09	MA1574.1	JASPAR	THRB
993	PEAKS039032	PPARG	ENSMUSG00000000440	Zinc-coordinating DNA-binding domains{2}	Nuclear receptors with C4 zinc fingers{2.1}	2.7e-193	4.61e-07	MA1574.1	JASPAR	THRB
994	PEAKS039046	PPARG	ENSMUSG00000000440	Zinc-coordinating DNA-binding domains{2}	Nuclear receptors with C4 zinc fingers{2.1}	2.02e-291	1.14e-07	MA1574.1	JASPAR	THRB
995	PEAKS039797	PPARG	ENSMUSG00000000440	Zinc-coordinating DNA-binding domains{2}	Nuclear receptors with C4 zinc fingers{2.1}	5.1e-189	1.11e-06	MA1574.1	JASPAR	THRB
996	PEAKS039798	PPARG	ENSMUSG00000000440	Zinc-coordinating DNA-binding domains{2}	Nuclear receptors with C4 zinc fingers{2.1}	2.79e-229	4.34e-07	MA1574.1	JASPAR	THRB
997	PEAKS040603	PPARG	ENSMUSG00000000440	Zinc-coordinating DNA-binding domains{2}	Nuclear receptors with C4 zinc fingers{2.1}	6.43e-245	9.27e-08	MA1574.1	JASPAR	THRB
998	PEAKS040615	PPARG	ENSMUSG00000000440	Zinc-coordinating DNA-binding domains{2}	Nuclear receptors with C4 zinc fingers{2.1}	1.32e-126	5.02e-08	MA1574.1	JASPAR	THRB
999	PEAKS042490	PPARG	ENSMUSG00000000440	Zinc-coordinating DNA-binding domains{2}	Nuclear receptors with C4 zinc fingers{2.1}	5.26e-43	1.6e-05	MA1574.1	JASPAR	THRB
1000	PEAKS042491	PPARG	ENSMUSG00000000440	Zinc-coordinating DNA-binding domains{2}	Nuclear receptors with C4 zinc fingers{2.1}	2.43e-207	1.17e-08	MA1574.1	JASPAR	THRB
1001	PEAKS054849	PPARG	ENSMUSG00000000440	Zinc-coordinating DNA-binding domains{2}	Nuclear receptors with C4 zinc fingers{2.1}	5.55e-174	6.94e-09	MA1574.1	JASPAR	THRB
1002	PEAKS037844	PRDM1	ENSMUSG00000038151	Zinc-coordinating DNA-binding domains{2}	C2H2 zinc finger factors{2.3}	5.19e-160	0.000834	MA0508.3	JASPAR	PRDM1
1003	PEAKS038654	PRDM1	ENSMUSG00000038151	Zinc-coordinating DNA-binding domains{2}	C2H2 zinc finger factors{2.3}	1.17e-10	1	#N/A	#N/A	#N/A
1004	PEAKS049648	PRDM1	ENSMUSG00000038151	Zinc-coordinating DNA-binding domains{2}	C2H2 zinc finger factors{2.3}	7.33e-199	0.000156	MA1981.1	JASPAR	ZNF530
1005	PEAKS037668	PRDM16	ENSMUSG00000039410	Zinc-coordinating DNA-binding domains{2}	C2H2 zinc finger factors{2.3}	1	1	0	JASPAR	NA
1006	PEAKS052630	PRDM9	ENSMUSG00000051977	Zinc-coordinating DNA-binding domains{2}	C2H2 zinc finger factors{2.3}	6.8e-06	1	#N/A	#N/A	#N/A
1007	PEAKS053234	PRDM9	ENSMUSG00000051977	Zinc-coordinating DNA-binding domains{2}	C2H2 zinc finger factors{2.3}	0.00122	1	#N/A	#N/A	#N/A
1008	PEAKS053237	PRDM9	ENSMUSG00000051977	Zinc-coordinating DNA-binding domains{2}	C2H2 zinc finger factors{2.3}	0.000136	1	#N/A	#N/A	#N/A
1009	PEAKS053238	PRDM9	ENSMUSG00000051977	Zinc-coordinating DNA-binding domains{2}	C2H2 zinc finger factors{2.3}	6.25e-14	1	#N/A	#N/A	#N/A
1010	PEAKS053239	PRDM9	ENSMUSG00000051977	Zinc-coordinating DNA-binding domains{2}	C2H2 zinc finger factors{2.3}	0.0119	1	#N/A	#N/A	#N/A
1011	PEAKS035596	PTF1A	ENSMUSG00000026735	Basic domains{1}	Basic helix-loop-helix factors (bHLH){1.2}	8.95e-191	4.2e-05	MA1642.1	JASPAR	NEUROG2
1012	PEAKS039232	PTF1A	ENSMUSG00000026735	Basic domains{1}	Basic helix-loop-helix factors (bHLH){1.2}	6.51e-194	3.13e-06	MA1619.1	JASPAR	PTF1A
1013	PEAKS039233	PTF1A	ENSMUSG00000026735	Basic domains{1}	Basic helix-loop-helix factors (bHLH){1.2}	2.55e-144	2.54e-05	MA0048.2	JASPAR	NHLH1
1014	PEAKS049408	PTF1A	ENSMUSG00000026735	Basic domains{1}	Basic helix-loop-helix factors (bHLH){1.2}	5.56e-167	5.57e-06	MA1619.1	JASPAR	PTF1A
1015	PEAKS048625	PURB	ENSMUSG00000094483	Yet undefined DNA-binding domains{0}	Uncharacterized{0.0}	1	1	0	JASPAR	NA
1016	PEAKS048626	PURB	ENSMUSG00000094483	Yet undefined DNA-binding domains{0}	Uncharacterized{0.0}	1	1	0	JASPAR	NA
1017	PEAKS048627	PURB	ENSMUSG00000094483	Yet undefined DNA-binding domains{0}	Uncharacterized{0.0}	1	1	0	JASPAR	NA
1018	PEAKS048628	PURB	ENSMUSG00000094483	Yet undefined DNA-binding domains{0}	Uncharacterized{0.0}	1	1	0	JASPAR	NA
1019	PEAKS048629	PURB	ENSMUSG00000094483	Yet undefined DNA-binding domains{0}	Uncharacterized{0.0}	1	1	0	JASPAR	NA
1020	PEAKS048630	PURB	ENSMUSG00000094483	Yet undefined DNA-binding domains{0}	Uncharacterized{0.0}	1	1	0	JASPAR	NA
1021	PEAKS036433	RARB	ENSMUSG00000017491	Zinc-coordinating DNA-binding domains{2}	Nuclear receptors with C4 zinc fingers{2.1}	6.49e-51	1	#N/A	#N/A	#N/A
1022	PEAKS037973	RARB	ENSMUSG00000017491	Zinc-coordinating DNA-binding domains{2}	Nuclear receptors with C4 zinc fingers{2.1}	6.4e-46	1	#N/A	#N/A	#N/A
1023	PEAKS059131	RBPJ	ENSMUSG00000039191	Immunoglobulin fold{6}	Rel homology region (RHR) factors{6.1}	0.000489	1	#N/A	#N/A	#N/A
1024	PEAKS059133	RBPJ	ENSMUSG00000039191	Immunoglobulin fold{6}	Rel homology region (RHR) factors{6.1}	7.9e-13	1	#N/A	#N/A	#N/A
1025	PEAKS059134	RBPJ	ENSMUSG00000039191	Immunoglobulin fold{6}	Rel homology region (RHR) factors{6.1}	2.59e-12	1	#N/A	#N/A	#N/A
1026	PEAKS035598	RBPJL	ENSMUSG00000017007	Immunoglobulin fold{6}	Rel homology region (RHR) factors{6.1}	2.61e-149	1.73e-05	MA1621.1	JASPAR	RBPJL
1027	PEAKS035911	REL	ENSMUSG00000020275	Immunoglobulin fold{6}	Rel homology region (RHR) factors{6.1}	2.32e-175	5.39e-07	MA0107.1	JASPAR	RELA
1028	PEAKS035358	RELA	ENSMUSG00000024927	Immunoglobulin fold{6}	Rel homology region (RHR) factors{6.1}	4.57e-202	2.58e-09	MA0107.1	JASPAR	RELA
1029	PEAKS035606	RELA	ENSMUSG00000024927	Immunoglobulin fold{6}	Rel homology region (RHR) factors{6.1}	1.95e-08	1	#N/A	#N/A	#N/A
1030	PEAKS035607	RELA	ENSMUSG00000024927	Immunoglobulin fold{6}	Rel homology region (RHR) factors{6.1}	6.96e-254	1.41e-08	MA0107.1	JASPAR	RELA
1031	PEAKS035608	RELA	ENSMUSG00000024927	Immunoglobulin fold{6}	Rel homology region (RHR) factors{6.1}	1.35e-221	1.22e-07	MA0107.1	JASPAR	RELA
1032	PEAKS035892	RELA	ENSMUSG00000024927	Immunoglobulin fold{6}	Rel homology region (RHR) factors{6.1}	7.42e-127	0.616	MA0101.1	JASPAR	REL
1033	PEAKS035893	RELA	ENSMUSG00000024927	Immunoglobulin fold{6}	Rel homology region (RHR) factors{6.1}	8.04e-167	1.44e-07	MA0107.1	JASPAR	RELA
1034	PEAKS035894	RELA	ENSMUSG00000024927	Immunoglobulin fold{6}	Rel homology region (RHR) factors{6.1}	9.88e-136	1.24e-08	MA0107.1	JASPAR	RELA
1035	PEAKS035895	RELA	ENSMUSG00000024927	Immunoglobulin fold{6}	Rel homology region (RHR) factors{6.1}	1.85e-152	8.32e-09	MA0107.1	JASPAR	RELA
1036	PEAKS036247	RELA	ENSMUSG00000024927	Immunoglobulin fold{6}	Rel homology region (RHR) factors{6.1}	3.35e-178	4.41e-09	MA0107.1	JASPAR	RELA
1037	PEAKS036248	RELA	ENSMUSG00000024927	Immunoglobulin fold{6}	Rel homology region (RHR) factors{6.1}	4.73e-176	2.74e-07	MA0107.1	JASPAR	RELA
1038	PEAKS036311	RELA	ENSMUSG00000024927	Immunoglobulin fold{6}	Rel homology region (RHR) factors{6.1}	3.77e-218	9.64e-08	MA0107.1	JASPAR	RELA
1039	PEAKS036312	RELA	ENSMUSG00000024927	Immunoglobulin fold{6}	Rel homology region (RHR) factors{6.1}	3.76e-211	5.57e-09	MA0107.1	JASPAR	RELA
1040	PEAKS036315	RELA	ENSMUSG00000024927	Immunoglobulin fold{6}	Rel homology region (RHR) factors{6.1}	1.16e-254	1.01e-08	MA0107.1	JASPAR	RELA
1041	PEAKS036320	RELA	ENSMUSG00000024927	Immunoglobulin fold{6}	Rel homology region (RHR) factors{6.1}	8.29e-173	1.79e-09	MA0107.1	JASPAR	RELA
1042	PEAKS036321	RELA	ENSMUSG00000024927	Immunoglobulin fold{6}	Rel homology region (RHR) factors{6.1}	3.61e-254	2.09e-08	MA0107.1	JASPAR	RELA
1043	PEAKS036324	RELA	ENSMUSG00000024927	Immunoglobulin fold{6}	Rel homology region (RHR) factors{6.1}	2.51e-200	5.14e-09	MA0107.1	JASPAR	RELA
1044	PEAKS036325	RELA	ENSMUSG00000024927	Immunoglobulin fold{6}	Rel homology region (RHR) factors{6.1}	8.71e-151	4.2e-09	MA0107.1	JASPAR	RELA
1045	PEAKS037537	RELA	ENSMUSG00000024927	Immunoglobulin fold{6}	Rel homology region (RHR) factors{6.1}	6.58e-187	6.91e-09	MA0101.1	JASPAR	REL
1046	PEAKS037538	RELA	ENSMUSG00000024927	Immunoglobulin fold{6}	Rel homology region (RHR) factors{6.1}	4.53e-168	2.34e-08	MA0107.1	JASPAR	RELA
1047	PEAKS037927	RELA	ENSMUSG00000024927	Immunoglobulin fold{6}	Rel homology region (RHR) factors{6.1}	0	1.99e-08	MA0107.1	JASPAR	RELA
1048	PEAKS037928	RELA	ENSMUSG00000024927	Immunoglobulin fold{6}	Rel homology region (RHR) factors{6.1}	0	3.95e-09	MA0107.1	JASPAR	RELA
1049	PEAKS037929	RELA	ENSMUSG00000024927	Immunoglobulin fold{6}	Rel homology region (RHR) factors{6.1}	3.49e-252	2.04e-09	MA0107.1	JASPAR	RELA
1050	PEAKS037930	RELA	ENSMUSG00000024927	Immunoglobulin fold{6}	Rel homology region (RHR) factors{6.1}	3e-235	2.33e-09	MA0107.1	JASPAR	RELA
1051	PEAKS038485	RELA	ENSMUSG00000024927	Immunoglobulin fold{6}	Rel homology region (RHR) factors{6.1}	7.97e-07	1	#N/A	#N/A	#N/A
1052	PEAKS038486	RELA	ENSMUSG00000024927	Immunoglobulin fold{6}	Rel homology region (RHR) factors{6.1}	1.6e-43	1	#N/A	#N/A	#N/A
1053	PEAKS038489	RELA	ENSMUSG00000024927	Immunoglobulin fold{6}	Rel homology region (RHR) factors{6.1}	1.42e-144	0.000188	MA1117.1	JASPAR	RELB
1054	PEAKS038490	RELA	ENSMUSG00000024927	Immunoglobulin fold{6}	Rel homology region (RHR) factors{6.1}	4.96e-94	0.0337	MA1117.1	JASPAR	RELB
1055	PEAKS038491	RELA	ENSMUSG00000024927	Immunoglobulin fold{6}	Rel homology region (RHR) factors{6.1}	1.18e-139	0.00424	MA1117.1	JASPAR	RELB
1056	PEAKS039927	RELA	ENSMUSG00000024927	Immunoglobulin fold{6}	Rel homology region (RHR) factors{6.1}	8.65e-97	0.0089	MA1117.1	JASPAR	RELB
1057	PEAKS039928	RELA	ENSMUSG00000024927	Immunoglobulin fold{6}	Rel homology region (RHR) factors{6.1}	4.38e-199	5.63e-09	MA0107.1	JASPAR	RELA
1058	PEAKS039929	RELA	ENSMUSG00000024927	Immunoglobulin fold{6}	Rel homology region (RHR) factors{6.1}	1.48e-121	0.00284	MA1117.1	JASPAR	RELB
1059	PEAKS039930	RELA	ENSMUSG00000024927	Immunoglobulin fold{6}	Rel homology region (RHR) factors{6.1}	2.5e-133	2.84e-09	MA0107.1	JASPAR	RELA
1060	PEAKS039931	RELA	ENSMUSG00000024927	Immunoglobulin fold{6}	Rel homology region (RHR) factors{6.1}	5.11e-81	0.00974	MA1117.1	JASPAR	RELB
1061	PEAKS039932	RELA	ENSMUSG00000024927	Immunoglobulin fold{6}	Rel homology region (RHR) factors{6.1}	2.25e-190	2.01e-09	MA0101.1	JASPAR	REL
1062	PEAKS039933	RELA	ENSMUSG00000024927	Immunoglobulin fold{6}	Rel homology region (RHR) factors{6.1}	5.02e-140	3.14e-09	MA0107.1	JASPAR	RELA
1063	PEAKS039934	RELA	ENSMUSG00000024927	Immunoglobulin fold{6}	Rel homology region (RHR) factors{6.1}	1.16e-131	5.7e-09	MA0107.1	JASPAR	RELA
1064	PEAKS040670	RELA	ENSMUSG00000024927	Immunoglobulin fold{6}	Rel homology region (RHR) factors{6.1}	1.38e-188	2.48e-08	MA0107.1	JASPAR	RELA
1065	PEAKS040671	RELA	ENSMUSG00000024927	Immunoglobulin fold{6}	Rel homology region (RHR) factors{6.1}	4.79e-149	1.35e-08	MA0107.1	JASPAR	RELA
1066	PEAKS040989	RELA	ENSMUSG00000024927	Immunoglobulin fold{6}	Rel homology region (RHR) factors{6.1}	1.72e-261	1.91e-08	MA0107.1	JASPAR	RELA
1067	PEAKS040990	RELA	ENSMUSG00000024927	Immunoglobulin fold{6}	Rel homology region (RHR) factors{6.1}	9.15e-250	1.21e-08	MA0107.1	JASPAR	RELA
1068	PEAKS040991	RELA	ENSMUSG00000024927	Immunoglobulin fold{6}	Rel homology region (RHR) factors{6.1}	1.85e-238	1.03e-08	MA0107.1	JASPAR	RELA
1069	PEAKS040992	RELA	ENSMUSG00000024927	Immunoglobulin fold{6}	Rel homology region (RHR) factors{6.1}	7.06e-259	9.76e-08	MA0107.1	JASPAR	RELA
1070	PEAKS040994	RELA	ENSMUSG00000024927	Immunoglobulin fold{6}	Rel homology region (RHR) factors{6.1}	3.63e-255	7.65e-08	MA0107.1	JASPAR	RELA
1071	PEAKS040995	RELA	ENSMUSG00000024927	Immunoglobulin fold{6}	Rel homology region (RHR) factors{6.1}	3.73e-227	1.94e-07	MA0107.1	JASPAR	RELA
1072	PEAKS040996	RELA	ENSMUSG00000024927	Immunoglobulin fold{6}	Rel homology region (RHR) factors{6.1}	2.13e-193	1.45e-08	MA0107.1	JASPAR	RELA
1073	PEAKS040997	RELA	ENSMUSG00000024927	Immunoglobulin fold{6}	Rel homology region (RHR) factors{6.1}	6.88e-217	1.3e-08	MA0107.1	JASPAR	RELA
1074	PEAKS048680	RELA	ENSMUSG00000024927	Immunoglobulin fold{6}	Rel homology region (RHR) factors{6.1}	1.62e-132	1.32e-06	MA0107.1	JASPAR	RELA
1075	PEAKS048681	RELA	ENSMUSG00000024927	Immunoglobulin fold{6}	Rel homology region (RHR) factors{6.1}	2.03e-21	1	#N/A	#N/A	#N/A
1076	PEAKS049101	RELA	ENSMUSG00000024927	Immunoglobulin fold{6}	Rel homology region (RHR) factors{6.1}	5.56e-229	1.24e-09	MA0107.1	JASPAR	RELA
1077	PEAKS049103	RELA	ENSMUSG00000024927	Immunoglobulin fold{6}	Rel homology region (RHR) factors{6.1}	2.25e-239	1.9e-05	MA0107.1	JASPAR	RELA
1078	PEAKS049108	RELA	ENSMUSG00000024927	Immunoglobulin fold{6}	Rel homology region (RHR) factors{6.1}	1.29e-196	7.63e-08	MA0107.1	JASPAR	RELA
1079	PEAKS049110	RELA	ENSMUSG00000024927	Immunoglobulin fold{6}	Rel homology region (RHR) factors{6.1}	1.28e-211	5.17e-08	MA0107.1	JASPAR	RELA
1080	PEAKS049117	RELA	ENSMUSG00000024927	Immunoglobulin fold{6}	Rel homology region (RHR) factors{6.1}	4.23e-268	2.17e-08	MA0107.1	JASPAR	RELA
1081	PEAKS049119	RELA	ENSMUSG00000024927	Immunoglobulin fold{6}	Rel homology region (RHR) factors{6.1}	7.03e-225	3.21e-09	MA0107.1	JASPAR	RELA
1082	PEAKS049130	RELA	ENSMUSG00000024927	Immunoglobulin fold{6}	Rel homology region (RHR) factors{6.1}	6.78e-243	6.21e-09	MA0107.1	JASPAR	RELA
1083	PEAKS049131	RELA	ENSMUSG00000024927	Immunoglobulin fold{6}	Rel homology region (RHR) factors{6.1}	6.94e-42	1	#N/A	#N/A	#N/A
1084	PEAKS049135	RELA	ENSMUSG00000024927	Immunoglobulin fold{6}	Rel homology region (RHR) factors{6.1}	2.99e-43	1	#N/A	#N/A	#N/A
1085	PEAKS049138	RELA	ENSMUSG00000024927	Immunoglobulin fold{6}	Rel homology region (RHR) factors{6.1}	7.54e-210	4.06e-08	MA0107.1	JASPAR	RELA
1086	PEAKS049792	RELA	ENSMUSG00000024927	Immunoglobulin fold{6}	Rel homology region (RHR) factors{6.1}	1.2e-63	1	#N/A	#N/A	#N/A
1087	PEAKS049793	RELA	ENSMUSG00000024927	Immunoglobulin fold{6}	Rel homology region (RHR) factors{6.1}	2.71e-202	2.16e-08	MA0107.1	JASPAR	RELA
1088	PEAKS049794	RELA	ENSMUSG00000024927	Immunoglobulin fold{6}	Rel homology region (RHR) factors{6.1}	8.23e-173	6.14e-08	MA0107.1	JASPAR	RELA
1089	PEAKS049795	RELA	ENSMUSG00000024927	Immunoglobulin fold{6}	Rel homology region (RHR) factors{6.1}	2.02e-191	1.39e-08	MA0107.1	JASPAR	RELA
1090	PEAKS049796	RELA	ENSMUSG00000024927	Immunoglobulin fold{6}	Rel homology region (RHR) factors{6.1}	8.57e-171	1.36e-08	MA0107.1	JASPAR	RELA
1091	PEAKS049797	RELA	ENSMUSG00000024927	Immunoglobulin fold{6}	Rel homology region (RHR) factors{6.1}	6.54e-162	1.02e-09	MA0107.1	JASPAR	RELA
1092	PEAKS049799	RELA	ENSMUSG00000024927	Immunoglobulin fold{6}	Rel homology region (RHR) factors{6.1}	5.4e-201	7.67e-09	MA0107.1	JASPAR	RELA
1093	PEAKS049800	RELA	ENSMUSG00000024927	Immunoglobulin fold{6}	Rel homology region (RHR) factors{6.1}	1.49e-144	7.45e-09	MA0107.1	JASPAR	RELA
1094	PEAKS049801	RELA	ENSMUSG00000024927	Immunoglobulin fold{6}	Rel homology region (RHR) factors{6.1}	2.39e-171	1.26e-08	MA0107.1	JASPAR	RELA
1095	PEAKS049802	RELA	ENSMUSG00000024927	Immunoglobulin fold{6}	Rel homology region (RHR) factors{6.1}	2.65e-178	1.87e-08	MA0107.1	JASPAR	RELA
1096	PEAKS049830	RELA	ENSMUSG00000024927	Immunoglobulin fold{6}	Rel homology region (RHR) factors{6.1}	0	5.2e-09	MA0107.1	JASPAR	RELA
1097	PEAKS049983	RELA	ENSMUSG00000024927	Immunoglobulin fold{6}	Rel homology region (RHR) factors{6.1}	7.85e-84	0.0014	MA0107.1	JASPAR	RELA
1098	PEAKS049984	RELA	ENSMUSG00000024927	Immunoglobulin fold{6}	Rel homology region (RHR) factors{6.1}	5.22e-77	0.135	MA1117.1	JASPAR	RELB
1099	PEAKS049986	RELA	ENSMUSG00000024927	Immunoglobulin fold{6}	Rel homology region (RHR) factors{6.1}	5.33e-07	1	#N/A	#N/A	#N/A
1100	PEAKS049987	RELA	ENSMUSG00000024927	Immunoglobulin fold{6}	Rel homology region (RHR) factors{6.1}	2.1e-78	1	#N/A	#N/A	#N/A
1101	PEAKS049988	RELA	ENSMUSG00000024927	Immunoglobulin fold{6}	Rel homology region (RHR) factors{6.1}	2.09e-77	6.39e-09	MA0107.1	JASPAR	RELA
1102	PEAKS049990	RELA	ENSMUSG00000024927	Immunoglobulin fold{6}	Rel homology region (RHR) factors{6.1}	4.68e-11	1	#N/A	#N/A	#N/A
1103	PEAKS050657	RELA	ENSMUSG00000024927	Immunoglobulin fold{6}	Rel homology region (RHR) factors{6.1}	2.28e-112	0.021	MA1117.1	JASPAR	RELB
1104	PEAKS050658	RELA	ENSMUSG00000024927	Immunoglobulin fold{6}	Rel homology region (RHR) factors{6.1}	2.16e-101	0.0169	MA1117.1	JASPAR	RELB
1105	PEAKS050659	RELA	ENSMUSG00000024927	Immunoglobulin fold{6}	Rel homology region (RHR) factors{6.1}	0.00407	1	#N/A	#N/A	#N/A
1106	PEAKS050660	RELA	ENSMUSG00000024927	Immunoglobulin fold{6}	Rel homology region (RHR) factors{6.1}	0.00773	0.0237	MA1117.1	JASPAR	RELB
1107	PEAKS050671	RELA	ENSMUSG00000024927	Immunoglobulin fold{6}	Rel homology region (RHR) factors{6.1}	0.000133	1	#N/A	#N/A	#N/A
1108	PEAKS050755	RELA	ENSMUSG00000024927	Immunoglobulin fold{6}	Rel homology region (RHR) factors{6.1}	1.06e-217	6.37e-09	MA0107.1	JASPAR	RELA
1109	PEAKS059247	RELA	ENSMUSG00000024927	Immunoglobulin fold{6}	Rel homology region (RHR) factors{6.1}	0	2.62e-09	MA0107.1	JASPAR	RELA
1110	PEAKS035889	RELB	ENSMUSG00000002983	Immunoglobulin fold{6}	Rel homology region (RHR) factors{6.1}	1.81e-183	3.69e-08	MA0101.1	JASPAR	REL
1111	PEAKS035891	RELB	ENSMUSG00000002983	Immunoglobulin fold{6}	Rel homology region (RHR) factors{6.1}	2.08e-88	2.87e-08	MA0107.1	JASPAR	RELA
1112	PEAKS036719	REST	ENSMUSG00000029249	Zinc-coordinating DNA-binding domains{2}	C2H2 zinc finger factors{2.3}	0	1.5e-17	MA0138.2	JASPAR	REST
1113	PEAKS049047	REST	ENSMUSG00000029249	Zinc-coordinating DNA-binding domains{2}	C2H2 zinc finger factors{2.3}	0	3.42e-18	MA0138.2	JASPAR	REST
1114	PEAKS049048	REST	ENSMUSG00000029249	Zinc-coordinating DNA-binding domains{2}	C2H2 zinc finger factors{2.3}	0	1.11e-15	MA0138.2	JASPAR	REST
1115	PEAKS049049	REST	ENSMUSG00000029249	Zinc-coordinating DNA-binding domains{2}	C2H2 zinc finger factors{2.3}	0	8.12e-20	MA0138.2	JASPAR	REST
1116	PEAKS049050	REST	ENSMUSG00000029249	Zinc-coordinating DNA-binding domains{2}	C2H2 zinc finger factors{2.3}	0	3.51e-16	MA0138.2	JASPAR	REST
1117	PEAKS038844	RFX1	ENSMUSG00000031706	Helix-turn-helix domains{3}	Fork head / winged helix factors{3.3}	0	7.25e-07	MA0798.3	JASPAR	RFX3
1118	PEAKS038845	RFX1	ENSMUSG00000031706	Helix-turn-helix domains{3}	Fork head / winged helix factors{3.3}	0	7.04e-07	MA0798.3	JASPAR	RFX3
1119	PEAKS038015	RFX2	ENSMUSG00000024206	Helix-turn-helix domains{3}	Fork head / winged helix factors{3.3}	0	1.28e-06	MA0798.3	JASPAR	RFX3
1120	PEAKS038016	RFX2	ENSMUSG00000024206	Helix-turn-helix domains{3}	Fork head / winged helix factors{3.3}	0	8.83e-07	MA0798.3	JASPAR	RFX3
1121	PEAKS039259	RORC	ENSMUSG00000028150	Zinc-coordinating DNA-binding domains{2}	Nuclear receptors with C4 zinc fingers{2.1}	5.05e-119	1.03e-09	MA0072.1	JASPAR	RORA
1122	PEAKS039261	RORC	ENSMUSG00000028150	Zinc-coordinating DNA-binding domains{2}	Nuclear receptors with C4 zinc fingers{2.1}	1.98e-38	1	#N/A	#N/A	#N/A
1123	PEAKS041089	RORC	ENSMUSG00000028150	Zinc-coordinating DNA-binding domains{2}	Nuclear receptors with C4 zinc fingers{2.1}	2.46e-162	1.48e-09	MA0072.1	JASPAR	RORA
1124	PEAKS041091	RORC	ENSMUSG00000028150	Zinc-coordinating DNA-binding domains{2}	Nuclear receptors with C4 zinc fingers{2.1}	0	1.81e-10	MA0072.1	JASPAR	RORA
1125	PEAKS041092	RORC	ENSMUSG00000028150	Zinc-coordinating DNA-binding domains{2}	Nuclear receptors with C4 zinc fingers{2.1}	0	2.32e-11	MA0072.1	JASPAR	RORA
1126	PEAKS035774	RUNX1	ENSMUSG00000022952	Immunoglobulin fold{6}	Runt domain factors{6.4}	2.66e-162	8.05e-06	MA0002.2	JASPAR	RUNX1
1127	PEAKS035896	RUNX1	ENSMUSG00000022952	Immunoglobulin fold{6}	Runt domain factors{6.4}	3.43e-248	0.585	MA0511.2	JASPAR	RUNX2
1128	PEAKS035897	RUNX1	ENSMUSG00000022952	Immunoglobulin fold{6}	Runt domain factors{6.4}	3.67e-78	2.46e-06	MA0002.2	JASPAR	RUNX1
1129	PEAKS035898	RUNX1	ENSMUSG00000022952	Immunoglobulin fold{6}	Runt domain factors{6.4}	2.31e-115	2.8e-10	MA0002.2	JASPAR	RUNX1
1130	PEAKS036191	RUNX1	ENSMUSG00000022952	Immunoglobulin fold{6}	Runt domain factors{6.4}	6.86e-244	7.81e-13	MA0002.2	JASPAR	RUNX1
1131	PEAKS036887	RUNX1	ENSMUSG00000022952	Immunoglobulin fold{6}	Runt domain factors{6.4}	1.29e-30	9.43e-05	MA0002.2	JASPAR	RUNX1
1132	PEAKS037023	RUNX1	ENSMUSG00000022952	Immunoglobulin fold{6}	Runt domain factors{6.4}	7.22e-205	2.86e-08	MA0002.2	JASPAR	RUNX1
1133	PEAKS040480	RUNX1	ENSMUSG00000022952	Immunoglobulin fold{6}	Runt domain factors{6.4}	8.44e-11	1	#N/A	#N/A	#N/A
1134	PEAKS040481	RUNX1	ENSMUSG00000022952	Immunoglobulin fold{6}	Runt domain factors{6.4}	0.000575	1	#N/A	#N/A	#N/A
1135	PEAKS040913	RUNX1	ENSMUSG00000022952	Immunoglobulin fold{6}	Runt domain factors{6.4}	1.35e-192	9.73e-11	MA0002.2	JASPAR	RUNX1
1136	PEAKS048531	RUNX1	ENSMUSG00000022952	Immunoglobulin fold{6}	Runt domain factors{6.4}	4.06e-06	1	#N/A	#N/A	#N/A
1137	PEAKS048532	RUNX1	ENSMUSG00000022952	Immunoglobulin fold{6}	Runt domain factors{6.4}	2.18e-05	1	#N/A	#N/A	#N/A
1138	PEAKS048533	RUNX1	ENSMUSG00000022952	Immunoglobulin fold{6}	Runt domain factors{6.4}	1.7e-115	1.56e-05	MA0511.2	JASPAR	RUNX2
1139	PEAKS048534	RUNX1	ENSMUSG00000022952	Immunoglobulin fold{6}	Runt domain factors{6.4}	1.89e-63	0.413	MA0511.2	JASPAR	RUNX2
1140	PEAKS049059	RUNX1	ENSMUSG00000022952	Immunoglobulin fold{6}	Runt domain factors{6.4}	3.07e-116	0.385	MA0684.2	JASPAR	RUNX3
1141	PEAKS049060	RUNX1	ENSMUSG00000022952	Immunoglobulin fold{6}	Runt domain factors{6.4}	6.32e-54	0.0775	MA0002.2	JASPAR	RUNX1
1142	PEAKS049061	RUNX1	ENSMUSG00000022952	Immunoglobulin fold{6}	Runt domain factors{6.4}	4.38e-98	0.222	MA0002.2	JASPAR	RUNX1
1143	PEAKS049062	RUNX1	ENSMUSG00000022952	Immunoglobulin fold{6}	Runt domain factors{6.4}	3.43e-51	0.0551	MA0002.2	JASPAR	RUNX1
1144	PEAKS049090	RUNX1	ENSMUSG00000022952	Immunoglobulin fold{6}	Runt domain factors{6.4}	1.43e-280	1.39e-11	MA0002.2	JASPAR	RUNX1
1145	PEAKS049091	RUNX1	ENSMUSG00000022952	Immunoglobulin fold{6}	Runt domain factors{6.4}	0	1.41e-06	MA0002.2	JASPAR	RUNX1
1146	PEAKS036576	RUNX2	ENSMUSG00000039153	Immunoglobulin fold{6}	Runt domain factors{6.4}	5.24e-150	4.96e-09	MA0002.2	JASPAR	RUNX1
1147	PEAKS039021	RUNX2	ENSMUSG00000039153	Immunoglobulin fold{6}	Runt domain factors{6.4}	0	3.12e-11	MA0002.2	JASPAR	RUNX1
1148	PEAKS039029	RUNX2	ENSMUSG00000039153	Immunoglobulin fold{6}	Runt domain factors{6.4}	0	3.26e-12	MA0002.2	JASPAR	RUNX1
1149	PEAKS039037	RUNX2	ENSMUSG00000039153	Immunoglobulin fold{6}	Runt domain factors{6.4}	2.18e-267	3.33e-06	MA0002.2	JASPAR	RUNX1
1150	PEAKS039043	RUNX2	ENSMUSG00000039153	Immunoglobulin fold{6}	Runt domain factors{6.4}	0	4.21e-09	MA0002.2	JASPAR	RUNX1
1151	PEAKS039851	RUNX2	ENSMUSG00000039153	Immunoglobulin fold{6}	Runt domain factors{6.4}	1.07e-284	3.21e-11	MA0002.2	JASPAR	RUNX1
1152	PEAKS039853	RUNX2	ENSMUSG00000039153	Immunoglobulin fold{6}	Runt domain factors{6.4}	4.24e-295	3.99e-14	MA0002.2	JASPAR	RUNX1
1153	PEAKS039855	RUNX2	ENSMUSG00000039153	Immunoglobulin fold{6}	Runt domain factors{6.4}	4.15e-164	3.89e-12	MA0002.2	JASPAR	RUNX1
1154	PEAKS039857	RUNX2	ENSMUSG00000039153	Immunoglobulin fold{6}	Runt domain factors{6.4}	2.03e-200	2.22e-06	MA0002.2	JASPAR	RUNX1
1155	PEAKS036336	RUNX3	ENSMUSG00000070691	Immunoglobulin fold{6}	Runt domain factors{6.4}	4.71e-241	1.79e-06	MA0002.2	JASPAR	RUNX1
1156	PEAKS036338	RUNX3	ENSMUSG00000070691	Immunoglobulin fold{6}	Runt domain factors{6.4}	6.18e-215	2.7e-12	MA0002.2	JASPAR	RUNX1
1157	PEAKS036340	RUNX3	ENSMUSG00000070691	Immunoglobulin fold{6}	Runt domain factors{6.4}	5.25e-278	7.19e-14	MA0002.2	JASPAR	RUNX1
1158	PEAKS036341	RUNX3	ENSMUSG00000070691	Immunoglobulin fold{6}	Runt domain factors{6.4}	3.22e-242	7.37e-11	MA0002.2	JASPAR	RUNX1
1159	PEAKS036342	RUNX3	ENSMUSG00000070691	Immunoglobulin fold{6}	Runt domain factors{6.4}	3.77e-217	7.92e-07	MA0002.2	JASPAR	RUNX1
1160	PEAKS036349	RUNX3	ENSMUSG00000070691	Immunoglobulin fold{6}	Runt domain factors{6.4}	1.11e-133	1.04e-06	MA0002.2	JASPAR	RUNX1
1161	PEAKS036255	RXRA	ENSMUSG00000015846	Zinc-coordinating DNA-binding domains{2}	Nuclear receptors with C4 zinc fingers{2.1}	5.41e-180	5.11e-09	MA1538.1	JASPAR	NR2F1
1162	PEAKS036431	RXRA	ENSMUSG00000015846	Zinc-coordinating DNA-binding domains{2}	Nuclear receptors with C4 zinc fingers{2.1}	6.6e-179	4.14e-08	MA1538.1	JASPAR	NR2F1
1163	PEAKS036434	RXRA	ENSMUSG00000015846	Zinc-coordinating DNA-binding domains{2}	Nuclear receptors with C4 zinc fingers{2.1}	2.74e-174	2.67e-06	MA0017.2	JASPAR	NR2F1
1164	PEAKS036449	RXRA	ENSMUSG00000015846	Zinc-coordinating DNA-binding domains{2}	Nuclear receptors with C4 zinc fingers{2.1}	7.78e-89	6.21e-06	MA1538.1	JASPAR	NR2F1
1165	PEAKS036450	RXRA	ENSMUSG00000015846	Zinc-coordinating DNA-binding domains{2}	Nuclear receptors with C4 zinc fingers{2.1}	3.31e-93	4.02e-07	MA1539.1	JASPAR	NR2F6
1166	PEAKS036451	RXRA	ENSMUSG00000015846	Zinc-coordinating DNA-binding domains{2}	Nuclear receptors with C4 zinc fingers{2.1}	1.31e-89	0.000199	MA0728.1	JASPAR	NR2F6
1167	PEAKS036452	RXRA	ENSMUSG00000015846	Zinc-coordinating DNA-binding domains{2}	Nuclear receptors with C4 zinc fingers{2.1}	5.6e-84	1.77e-06	MA0017.2	JASPAR	NR2F1
1168	PEAKS036453	RXRA	ENSMUSG00000015846	Zinc-coordinating DNA-binding domains{2}	Nuclear receptors with C4 zinc fingers{2.1}	1.59e-172	2.67e-10	MA0504.1	JASPAR	NR2C2
1169	PEAKS036454	RXRA	ENSMUSG00000015846	Zinc-coordinating DNA-binding domains{2}	Nuclear receptors with C4 zinc fingers{2.1}	1.49e-158	0.000498	MA0728.1	JASPAR	NR2F6
1170	PEAKS036455	RXRA	ENSMUSG00000015846	Zinc-coordinating DNA-binding domains{2}	Nuclear receptors with C4 zinc fingers{2.1}	1.39e-182	2.2e-09	MA1538.1	JASPAR	NR2F1
1171	PEAKS036456	RXRA	ENSMUSG00000015846	Zinc-coordinating DNA-binding domains{2}	Nuclear receptors with C4 zinc fingers{2.1}	1.72e-169	3.23e-09	MA1538.1	JASPAR	NR2F1
1172	PEAKS039019	RXRA	ENSMUSG00000015846	Zinc-coordinating DNA-binding domains{2}	Nuclear receptors with C4 zinc fingers{2.1}	7.37e-111	0.1	MA0676.1	JASPAR	NR2E1
1173	PEAKS039020	RXRA	ENSMUSG00000015846	Zinc-coordinating DNA-binding domains{2}	Nuclear receptors with C4 zinc fingers{2.1}	1.85e-108	3.97e-05	MA1535.1	JASPAR	NR2C1
1174	PEAKS039027	RXRA	ENSMUSG00000015846	Zinc-coordinating DNA-binding domains{2}	Nuclear receptors with C4 zinc fingers{2.1}	2.5e-86	0.0251	MA0676.1	JASPAR	NR2E1
1175	PEAKS039028	RXRA	ENSMUSG00000015846	Zinc-coordinating DNA-binding domains{2}	Nuclear receptors with C4 zinc fingers{2.1}	5.48e-94	0.0665	MA0512.2	JASPAR	RXRA
1176	PEAKS039035	RXRA	ENSMUSG00000015846	Zinc-coordinating DNA-binding domains{2}	Nuclear receptors with C4 zinc fingers{2.1}	1.58e-99	0.15	MA0114.4	JASPAR	HNF4A
1177	PEAKS039036	RXRA	ENSMUSG00000015846	Zinc-coordinating DNA-binding domains{2}	Nuclear receptors with C4 zinc fingers{2.1}	4.85e-99	0.0174	MA0676.1	JASPAR	NR2E1
1178	PEAKS039041	RXRA	ENSMUSG00000015846	Zinc-coordinating DNA-binding domains{2}	Nuclear receptors with C4 zinc fingers{2.1}	0	8.76e-10	MA0504.1	JASPAR	NR2C2
1179	PEAKS039042	RXRA	ENSMUSG00000015846	Zinc-coordinating DNA-binding domains{2}	Nuclear receptors with C4 zinc fingers{2.1}	0	6.7e-10	MA0504.1	JASPAR	NR2C2
1180	PEAKS039670	RXRA	ENSMUSG00000015846	Zinc-coordinating DNA-binding domains{2}	Nuclear receptors with C4 zinc fingers{2.1}	6.46e-138	6.84e-08	MA1538.1	JASPAR	NR2F1
1181	PEAKS039672	RXRA	ENSMUSG00000015846	Zinc-coordinating DNA-binding domains{2}	Nuclear receptors with C4 zinc fingers{2.1}	5.31e-132	3.6e-09	MA1538.1	JASPAR	NR2F1
1182	PEAKS039674	RXRA	ENSMUSG00000015846	Zinc-coordinating DNA-binding domains{2}	Nuclear receptors with C4 zinc fingers{2.1}	4.99e-171	2.7e-09	MA1538.1	JASPAR	NR2F1
1183	PEAKS039676	RXRA	ENSMUSG00000015846	Zinc-coordinating DNA-binding domains{2}	Nuclear receptors with C4 zinc fingers{2.1}	2.54e-167	6.25e-08	MA1539.1	JASPAR	NR2F6
1184	PEAKS042495	RXRA	ENSMUSG00000015846	Zinc-coordinating DNA-binding domains{2}	Nuclear receptors with C4 zinc fingers{2.1}	5.91e-116	0.188	MA0017.2	JASPAR	NR2F1
1185	PEAKS057208	RXRA	ENSMUSG00000015846	Zinc-coordinating DNA-binding domains{2}	Nuclear receptors with C4 zinc fingers{2.1}	1.8e-217	4.3e-08	MA1538.1	JASPAR	NR2F1
1186	PEAKS057209	RXRA	ENSMUSG00000015846	Zinc-coordinating DNA-binding domains{2}	Nuclear receptors with C4 zinc fingers{2.1}	7.06e-209	1.24e-08	MA1538.1	JASPAR	NR2F1
1187	PEAKS038516	SALL4	ENSMUSG00000027547	Zinc-coordinating DNA-binding domains{2}	C2H2 zinc finger factors{2.3}	1	0.0743	MA1647.2	JASPAR	PRDM4
1188	PEAKS038517	SALL4	ENSMUSG00000027547	Zinc-coordinating DNA-binding domains{2}	C2H2 zinc finger factors{2.3}	1	0.129	MA1647.2	JASPAR	PRDM4
1189	PEAKS038518	SALL4	ENSMUSG00000027547	Zinc-coordinating DNA-binding domains{2}	C2H2 zinc finger factors{2.3}	1	0.324	MA1972.1	JASPAR	ZFP14
1190	PEAKS037860	SATB1	ENSMUSG00000023927	Helix-turn-helix domains{3}	Homeo domain factors{3.1}	3.99e-75	1	#N/A	#N/A	#N/A
1191	PEAKS036054	SIX2	ENSMUSG00000024134	Helix-turn-helix domains{3}	Homeo domain factors{3.1}	9.89e-189	3.98e-12	MA1119.1	JASPAR	SIX2
1192	PEAKS036055	SIX2	ENSMUSG00000024134	Helix-turn-helix domains{3}	Homeo domain factors{3.1}	1.94e-162	4.16e-08	MA1118.1	JASPAR	SIX1
1193	PEAKS049615	SIX2	ENSMUSG00000024134	Helix-turn-helix domains{3}	Homeo domain factors{3.1}	2.87e-151	7.01e-09	MA1119.1	JASPAR	SIX2
1194	PEAKS049621	SIX2	ENSMUSG00000024134	Helix-turn-helix domains{3}	Homeo domain factors{3.1}	1.25e-215	1.43e-12	MA1119.1	JASPAR	SIX2
1195	PEAKS049622	SIX2	ENSMUSG00000024134	Helix-turn-helix domains{3}	Homeo domain factors{3.1}	2.67e-190	6.52e-10	MA1119.1	JASPAR	SIX2
1196	PEAKS049623	SIX2	ENSMUSG00000024134	Helix-turn-helix domains{3}	Homeo domain factors{3.1}	4.94e-208	2.5e-09	MA1119.1	JASPAR	SIX2
1197	PEAKS038488	SMAD3	ENSMUSG00000032402	β-Hairpin exposed by an α/β-scaffold{7}	SMAD/NF-1 DNA-binding domain factors{7.1}	0.00367	1	#N/A	#N/A	#N/A
1198	PEAKS038493	SMAD3	ENSMUSG00000032402	β-Hairpin exposed by an α/β-scaffold{7}	SMAD/NF-1 DNA-binding domain factors{7.1}	6.98e-60	0.928	MA1964.1	JASPAR	SMAD2
1199	PEAKS037135	SMAD4	ENSMUSG00000024515	β-Hairpin exposed by an α/β-scaffold{7}	SMAD/NF-1 DNA-binding domain factors{7.1}	2.73e-54	7.44e-06	MA1964.1	JASPAR	SMAD2
1200	PEAKS042204	SMAD4	ENSMUSG00000024515	β-Hairpin exposed by an α/β-scaffold{7}	SMAD/NF-1 DNA-binding domain factors{7.1}	4.17e-49	0.332	MA1964.1	JASPAR	SMAD2
1201	PEAKS055750	SMAD4	ENSMUSG00000024515	β-Hairpin exposed by an α/β-scaffold{7}	SMAD/NF-1 DNA-binding domain factors{7.1}	1.12e-32	1	#N/A	#N/A	#N/A
1202	PEAKS059127	SMAD4	ENSMUSG00000024515	β-Hairpin exposed by an α/β-scaffold{7}	SMAD/NF-1 DNA-binding domain factors{7.1}	3.09e-25	0.904	MA1964.1	JASPAR	SMAD2
1203	PEAKS059128	SMAD4	ENSMUSG00000024515	β-Hairpin exposed by an α/β-scaffold{7}	SMAD/NF-1 DNA-binding domain factors{7.1}	7.77e-16	0.957	MA1153.1	JASPAR	SMAD4
1204	PEAKS059129	SMAD4	ENSMUSG00000024515	β-Hairpin exposed by an α/β-scaffold{7}	SMAD/NF-1 DNA-binding domain factors{7.1}	1.15e-51	0.971	MA1964.1	JASPAR	SMAD2
1205	PEAKS059130	SMAD4	ENSMUSG00000024515	β-Hairpin exposed by an α/β-scaffold{7}	SMAD/NF-1 DNA-binding domain factors{7.1}	8.44e-45	0.951	MA1153.1	JASPAR	SMAD4
1206	PEAKS038220	SOX10	ENSMUSG00000033006	Other all-alpha-helical DNA-binding domains{4}	High-mobility group (HMG) domain factors{4.1}	1.54e-119	1.11e-08	MA0867.2	JASPAR	SOX4
1207	PEAKS057174	SOX11	ENSMUSG00000063632	Other all-alpha-helical DNA-binding domains{4}	High-mobility group (HMG) domain factors{4.1}	0	4.34e-10	MA0869.2	JASPAR	SOX11
1208	PEAKS039191	SOX2	ENSMUSG00000074637	Other all-alpha-helical DNA-binding domains{4}	High-mobility group (HMG) domain factors{4.1}	1.61e-143	9.84e-10	MA0867.2	JASPAR	SOX4
1209	PEAKS048661	SOX2	ENSMUSG00000074637	Other all-alpha-helical DNA-binding domains{4}	High-mobility group (HMG) domain factors{4.1}	5.61e-63	0.689	MA1561.1	JASPAR	SOX12
1210	PEAKS048662	SOX2	ENSMUSG00000074637	Other all-alpha-helical DNA-binding domains{4}	High-mobility group (HMG) domain factors{4.1}	2.19e-78	0.419	MA0442.2	JASPAR	SOX10
1211	PEAKS048663	SOX2	ENSMUSG00000074637	Other all-alpha-helical DNA-binding domains{4}	High-mobility group (HMG) domain factors{4.1}	5.58e-26	0.675	MA1561.1	JASPAR	SOX12
1212	PEAKS049524	SOX2	ENSMUSG00000074637	Other all-alpha-helical DNA-binding domains{4}	High-mobility group (HMG) domain factors{4.1}	1.34e-108	5.14e-10	MA0867.2	JASPAR	SOX4
1213	PEAKS055224	SOX2	ENSMUSG00000074637	Other all-alpha-helical DNA-binding domains{4}	High-mobility group (HMG) domain factors{4.1}	3.01e-144	2.06e-09	MA0867.2	JASPAR	SOX4
1214	PEAKS048643	SOX30	ENSMUSG00000040489	Other all-alpha-helical DNA-binding domains{4}	High-mobility group (HMG) domain factors{4.1}	1	1	0	JASPAR	NA
1215	PEAKS036535	SOX4	ENSMUSG00000076431	Other all-alpha-helical DNA-binding domains{4}	High-mobility group (HMG) domain factors{4.1}	4.16e-283	2.98e-09	MA0869.2	JASPAR	SOX11
1216	PEAKS057173	SOX4	ENSMUSG00000076431	Other all-alpha-helical DNA-binding domains{4}	High-mobility group (HMG) domain factors{4.1}	0	2.55e-13	MA0869.2	JASPAR	SOX11
1217	PEAKS035367	SOX6	ENSMUSG00000051910	Other all-alpha-helical DNA-binding domains{4}	High-mobility group (HMG) domain factors{4.1}	1.7e-105	0.377	MA0866.1	JASPAR	SOX21
1218	PEAKS038125	SOX9	ENSMUSG00000000567	Other all-alpha-helical DNA-binding domains{4}	High-mobility group (HMG) domain factors{4.1}	2.63e-06	0.704	MA1562.1	JASPAR	SOX14
1219	PEAKS038504	SOX9	ENSMUSG00000000567	Other all-alpha-helical DNA-binding domains{4}	High-mobility group (HMG) domain factors{4.1}	5.15e-54	3.14e-08	MA0867.2	JASPAR	SOX4
1220	PEAKS038700	SP7	ENSMUSG00000060284	Zinc-coordinating DNA-binding domains{2}	C2H2 zinc finger factors{2.3}	1	0.281	MA1992.1	JASPAR	IKZF3
1221	PEAKS039079	SP7	ENSMUSG00000060284	Zinc-coordinating DNA-binding domains{2}	C2H2 zinc finger factors{2.3}	1	0.123	MA0039.4	JASPAR	KLF4
1222	PEAKS039254	SP9	ENSMUSG00000068859	Zinc-coordinating DNA-binding domains{2}	C2H2 zinc finger factors{2.3}	8.88e-08	0.00682	MA0732.1	JASPAR	EGR3
1223	PEAKS050021	SPEN	ENSMUSG00000040761	Yet undefined DNA-binding domains{0}	Uncharacterized{0.0}	1	1	0	JASPAR	NA
1224	PEAKS050033	SPEN	ENSMUSG00000040761	Yet undefined DNA-binding domains{0}	Uncharacterized{0.0}	1	1	0	JASPAR	NA
1225	PEAKS036237	SPI1	ENSMUSG00000002111	Helix-turn-helix domains{3}	Tryptophan cluster factors{3.5}	0	2.34e-13	MA0081.2	JASPAR	SPIB
1226	PEAKS036239	SPI1	ENSMUSG00000002111	Helix-turn-helix domains{3}	Tryptophan cluster factors{3.5}	0	1.19e-14	MA0081.2	JASPAR	SPIB
1227	PEAKS036251	SPI1	ENSMUSG00000002111	Helix-turn-helix domains{3}	Tryptophan cluster factors{3.5}	0	1.06e-12	MA0081.2	JASPAR	SPIB
1228	PEAKS036252	SPI1	ENSMUSG00000002111	Helix-turn-helix domains{3}	Tryptophan cluster factors{3.5}	0	1.47e-13	MA0081.2	JASPAR	SPIB
1229	PEAKS036305	SPI1	ENSMUSG00000002111	Helix-turn-helix domains{3}	Tryptophan cluster factors{3.5}	0	5.03e-12	MA0081.2	JASPAR	SPIB
1230	PEAKS036306	SPI1	ENSMUSG00000002111	Helix-turn-helix domains{3}	Tryptophan cluster factors{3.5}	0	4.27e-12	MA0081.2	JASPAR	SPIB
1231	PEAKS036307	SPI1	ENSMUSG00000002111	Helix-turn-helix domains{3}	Tryptophan cluster factors{3.5}	0	1.86e-12	MA0081.2	JASPAR	SPIB
1232	PEAKS036309	SPI1	ENSMUSG00000002111	Helix-turn-helix domains{3}	Tryptophan cluster factors{3.5}	0	8.2e-13	MA0080.6	JASPAR	SPI1
1233	PEAKS036318	SPI1	ENSMUSG00000002111	Helix-turn-helix domains{3}	Tryptophan cluster factors{3.5}	0	2.6e-12	MA0080.6	JASPAR	SPI1
1234	PEAKS036319	SPI1	ENSMUSG00000002111	Helix-turn-helix domains{3}	Tryptophan cluster factors{3.5}	0	4.26e-11	MA0081.2	JASPAR	SPIB
1235	PEAKS036322	SPI1	ENSMUSG00000002111	Helix-turn-helix domains{3}	Tryptophan cluster factors{3.5}	0	3.05e-11	MA0081.2	JASPAR	SPIB
1236	PEAKS036323	SPI1	ENSMUSG00000002111	Helix-turn-helix domains{3}	Tryptophan cluster factors{3.5}	0	1.17e-11	MA0081.2	JASPAR	SPIB
1237	PEAKS036424	SPI1	ENSMUSG00000002111	Helix-turn-helix domains{3}	Tryptophan cluster factors{3.5}	0	1.63e-14	MA0081.2	JASPAR	SPIB
1238	PEAKS036891	SPI1	ENSMUSG00000002111	Helix-turn-helix domains{3}	Tryptophan cluster factors{3.5}	0	1.69e-11	MA0081.2	JASPAR	SPIB
1239	PEAKS037583	SPI1	ENSMUSG00000002111	Helix-turn-helix domains{3}	Tryptophan cluster factors{3.5}	0	1.21e-11	MA0080.6	JASPAR	SPI1
1240	PEAKS037584	SPI1	ENSMUSG00000002111	Helix-turn-helix domains{3}	Tryptophan cluster factors{3.5}	0	5.94e-11	MA0080.6	JASPAR	SPI1
1241	PEAKS037585	SPI1	ENSMUSG00000002111	Helix-turn-helix domains{3}	Tryptophan cluster factors{3.5}	0	3.32e-13	MA0081.2	JASPAR	SPIB
1242	PEAKS037586	SPI1	ENSMUSG00000002111	Helix-turn-helix domains{3}	Tryptophan cluster factors{3.5}	0	2.23e-13	MA0081.2	JASPAR	SPIB
1243	PEAKS037587	SPI1	ENSMUSG00000002111	Helix-turn-helix domains{3}	Tryptophan cluster factors{3.5}	0	1.33e-11	MA0081.2	JASPAR	SPIB
1244	PEAKS037588	SPI1	ENSMUSG00000002111	Helix-turn-helix domains{3}	Tryptophan cluster factors{3.5}	0	3.06e-14	MA0081.2	JASPAR	SPIB
1245	PEAKS037590	SPI1	ENSMUSG00000002111	Helix-turn-helix domains{3}	Tryptophan cluster factors{3.5}	0	9.6e-13	MA0081.2	JASPAR	SPIB
1246	PEAKS037591	SPI1	ENSMUSG00000002111	Helix-turn-helix domains{3}	Tryptophan cluster factors{3.5}	0	1.17e-12	MA0081.2	JASPAR	SPIB
1247	PEAKS037592	SPI1	ENSMUSG00000002111	Helix-turn-helix domains{3}	Tryptophan cluster factors{3.5}	0	1.11e-14	MA0081.2	JASPAR	SPIB
1248	PEAKS037593	SPI1	ENSMUSG00000002111	Helix-turn-helix domains{3}	Tryptophan cluster factors{3.5}	0	2.08e-12	MA0081.2	JASPAR	SPIB
1249	PEAKS037594	SPI1	ENSMUSG00000002111	Helix-turn-helix domains{3}	Tryptophan cluster factors{3.5}	0	1.43e-12	MA0081.2	JASPAR	SPIB
1250	PEAKS038347	SPI1	ENSMUSG00000002111	Helix-turn-helix domains{3}	Tryptophan cluster factors{3.5}	0	4.3e-11	MA0080.6	JASPAR	SPI1
1251	PEAKS038348	SPI1	ENSMUSG00000002111	Helix-turn-helix domains{3}	Tryptophan cluster factors{3.5}	0	7.49e-12	MA0080.6	JASPAR	SPI1
1252	PEAKS038479	SPI1	ENSMUSG00000002111	Helix-turn-helix domains{3}	Tryptophan cluster factors{3.5}	0	1.11e-10	MA0080.6	JASPAR	SPI1
1253	PEAKS038480	SPI1	ENSMUSG00000002111	Helix-turn-helix domains{3}	Tryptophan cluster factors{3.5}	0	3.65e-10	MA0080.6	JASPAR	SPI1
1254	PEAKS038649	SPI1	ENSMUSG00000002111	Helix-turn-helix domains{3}	Tryptophan cluster factors{3.5}	0	5.3e-11	MA0081.2	JASPAR	SPIB
1255	PEAKS038650	SPI1	ENSMUSG00000002111	Helix-turn-helix domains{3}	Tryptophan cluster factors{3.5}	0	1.39e-11	MA0081.2	JASPAR	SPIB
1256	PEAKS038651	SPI1	ENSMUSG00000002111	Helix-turn-helix domains{3}	Tryptophan cluster factors{3.5}	0	8.99e-12	MA0080.6	JASPAR	SPI1
1257	PEAKS038921	SPI1	ENSMUSG00000002111	Helix-turn-helix domains{3}	Tryptophan cluster factors{3.5}	0	2.99e-12	MA0080.6	JASPAR	SPI1
1258	PEAKS038922	SPI1	ENSMUSG00000002111	Helix-turn-helix domains{3}	Tryptophan cluster factors{3.5}	0	3.7e-12	MA0081.2	JASPAR	SPIB
1259	PEAKS038923	SPI1	ENSMUSG00000002111	Helix-turn-helix domains{3}	Tryptophan cluster factors{3.5}	0	1.01e-11	MA0081.2	JASPAR	SPIB
1260	PEAKS040350	SPI1	ENSMUSG00000002111	Helix-turn-helix domains{3}	Tryptophan cluster factors{3.5}	0	2.4e-09	MA0080.6	JASPAR	SPI1
1261	PEAKS040351	SPI1	ENSMUSG00000002111	Helix-turn-helix domains{3}	Tryptophan cluster factors{3.5}	0	3.06e-07	MA0080.6	JASPAR	SPI1
1262	PEAKS040408	SPI1	ENSMUSG00000002111	Helix-turn-helix domains{3}	Tryptophan cluster factors{3.5}	0	3.56e-12	MA0080.6	JASPAR	SPI1
1263	PEAKS040409	SPI1	ENSMUSG00000002111	Helix-turn-helix domains{3}	Tryptophan cluster factors{3.5}	0	3.82e-12	MA0081.2	JASPAR	SPIB
1264	PEAKS040453	SPI1	ENSMUSG00000002111	Helix-turn-helix domains{3}	Tryptophan cluster factors{3.5}	0	8.1e-12	MA0080.6	JASPAR	SPI1
1265	PEAKS040478	SPI1	ENSMUSG00000002111	Helix-turn-helix domains{3}	Tryptophan cluster factors{3.5}	0	2.41e-10	MA0080.6	JASPAR	SPI1
1266	PEAKS040479	SPI1	ENSMUSG00000002111	Helix-turn-helix domains{3}	Tryptophan cluster factors{3.5}	0	3.03e-13	MA0081.2	JASPAR	SPIB
1267	PEAKS042478	SPI1	ENSMUSG00000002111	Helix-turn-helix domains{3}	Tryptophan cluster factors{3.5}	0	2.61e-11	MA0081.2	JASPAR	SPIB
1268	PEAKS042479	SPI1	ENSMUSG00000002111	Helix-turn-helix domains{3}	Tryptophan cluster factors{3.5}	0	2.79e-11	MA0080.6	JASPAR	SPI1
1269	PEAKS048427	SPI1	ENSMUSG00000002111	Helix-turn-helix domains{3}	Tryptophan cluster factors{3.5}	0	1.12e-10	MA0080.6	JASPAR	SPI1
1270	PEAKS048428	SPI1	ENSMUSG00000002111	Helix-turn-helix domains{3}	Tryptophan cluster factors{3.5}	0	7.93e-12	MA0080.6	JASPAR	SPI1
1271	PEAKS048682	SPI1	ENSMUSG00000002111	Helix-turn-helix domains{3}	Tryptophan cluster factors{3.5}	0	2.14e-12	MA0081.2	JASPAR	SPIB
1272	PEAKS048683	SPI1	ENSMUSG00000002111	Helix-turn-helix domains{3}	Tryptophan cluster factors{3.5}	0	5.83e-12	MA0081.2	JASPAR	SPIB
1273	PEAKS048684	SPI1	ENSMUSG00000002111	Helix-turn-helix domains{3}	Tryptophan cluster factors{3.5}	0	1.72e-12	MA0081.2	JASPAR	SPIB
1274	PEAKS049092	SPI1	ENSMUSG00000002111	Helix-turn-helix domains{3}	Tryptophan cluster factors{3.5}	0	2.28e-12	MA0081.2	JASPAR	SPIB
1275	PEAKS049093	SPI1	ENSMUSG00000002111	Helix-turn-helix domains{3}	Tryptophan cluster factors{3.5}	0	1.01e-11	MA0081.2	JASPAR	SPIB
1276	PEAKS049098	SPI1	ENSMUSG00000002111	Helix-turn-helix domains{3}	Tryptophan cluster factors{3.5}	0	2.37e-13	MA0081.2	JASPAR	SPIB
1277	PEAKS049099	SPI1	ENSMUSG00000002111	Helix-turn-helix domains{3}	Tryptophan cluster factors{3.5}	0	8.72e-13	MA0081.2	JASPAR	SPIB
1278	PEAKS049105	SPI1	ENSMUSG00000002111	Helix-turn-helix domains{3}	Tryptophan cluster factors{3.5}	0	7.62e-12	MA0081.2	JASPAR	SPIB
1279	PEAKS049107	SPI1	ENSMUSG00000002111	Helix-turn-helix domains{3}	Tryptophan cluster factors{3.5}	0	3.18e-11	MA0081.2	JASPAR	SPIB
1280	PEAKS049113	SPI1	ENSMUSG00000002111	Helix-turn-helix domains{3}	Tryptophan cluster factors{3.5}	0	8.52e-13	MA0081.2	JASPAR	SPIB
1281	PEAKS049115	SPI1	ENSMUSG00000002111	Helix-turn-helix domains{3}	Tryptophan cluster factors{3.5}	0	9.78e-12	MA0081.2	JASPAR	SPIB
1282	PEAKS049120	SPI1	ENSMUSG00000002111	Helix-turn-helix domains{3}	Tryptophan cluster factors{3.5}	0	4.88e-12	MA0080.6	JASPAR	SPI1
1283	PEAKS049121	SPI1	ENSMUSG00000002111	Helix-turn-helix domains{3}	Tryptophan cluster factors{3.5}	0	2.38e-12	MA0080.6	JASPAR	SPI1
1284	PEAKS049123	SPI1	ENSMUSG00000002111	Helix-turn-helix domains{3}	Tryptophan cluster factors{3.5}	0	1.95e-13	MA0081.2	JASPAR	SPIB
1285	PEAKS049125	SPI1	ENSMUSG00000002111	Helix-turn-helix domains{3}	Tryptophan cluster factors{3.5}	0	9.34e-12	MA0080.6	JASPAR	SPI1
1286	PEAKS049136	SPI1	ENSMUSG00000002111	Helix-turn-helix domains{3}	Tryptophan cluster factors{3.5}	0	1.47e-12	MA0081.2	JASPAR	SPIB
1287	PEAKS049137	SPI1	ENSMUSG00000002111	Helix-turn-helix domains{3}	Tryptophan cluster factors{3.5}	0	1.47e-12	MA0081.2	JASPAR	SPIB
1288	PEAKS049363	SPI1	ENSMUSG00000002111	Helix-turn-helix domains{3}	Tryptophan cluster factors{3.5}	0	9.03e-13	MA0081.2	JASPAR	SPIB
1289	PEAKS049364	SPI1	ENSMUSG00000002111	Helix-turn-helix domains{3}	Tryptophan cluster factors{3.5}	0	2.51e-12	MA0080.6	JASPAR	SPI1
1290	PEAKS049728	SPI1	ENSMUSG00000002111	Helix-turn-helix domains{3}	Tryptophan cluster factors{3.5}	0	1.03e-13	MA0080.6	JASPAR	SPI1
1291	PEAKS049729	SPI1	ENSMUSG00000002111	Helix-turn-helix domains{3}	Tryptophan cluster factors{3.5}	0	1.77e-13	MA0081.2	JASPAR	SPIB
1292	PEAKS054864	SPI1	ENSMUSG00000002111	Helix-turn-helix domains{3}	Tryptophan cluster factors{3.5}	0	4.91e-11	MA0081.2	JASPAR	SPIB
1293	PEAKS054865	SPI1	ENSMUSG00000002111	Helix-turn-helix domains{3}	Tryptophan cluster factors{3.5}	0	1.99e-12	MA0081.2	JASPAR	SPIB
1294	PEAKS055167	SPI1	ENSMUSG00000002111	Helix-turn-helix domains{3}	Tryptophan cluster factors{3.5}	0	2.46e-13	MA0080.6	JASPAR	SPI1
1295	PEAKS058091	SPI1	ENSMUSG00000002111	Helix-turn-helix domains{3}	Tryptophan cluster factors{3.5}	1.9e-90	3.37e-08	MA0081.2	JASPAR	SPIB
1296	PEAKS058093	SPI1	ENSMUSG00000002111	Helix-turn-helix domains{3}	Tryptophan cluster factors{3.5}	2.2e-190	9.11e-09	MA0081.2	JASPAR	SPIB
1297	PEAKS036519	SREBF1	ENSMUSG00000020538	Basic domains{1}	Basic helix-loop-helix factors (bHLH){1.2}	6.52e-22	1	#N/A	#N/A	#N/A
1298	PEAKS036520	SREBF1	ENSMUSG00000020538	Basic domains{1}	Basic helix-loop-helix factors (bHLH){1.2}	9.06e-20	1	#N/A	#N/A	#N/A
1299	PEAKS036521	SREBF1	ENSMUSG00000020538	Basic domains{1}	Basic helix-loop-helix factors (bHLH){1.2}	2.36e-93	1	#N/A	#N/A	#N/A
1300	PEAKS036522	SREBF1	ENSMUSG00000020538	Basic domains{1}	Basic helix-loop-helix factors (bHLH){1.2}	5.67e-42	1	#N/A	#N/A	#N/A
1301	PEAKS036523	SREBF1	ENSMUSG00000020538	Basic domains{1}	Basic helix-loop-helix factors (bHLH){1.2}	7.36e-113	6.08e-08	MA0595.1	JASPAR	SREBF1
1302	PEAKS036524	SREBF1	ENSMUSG00000020538	Basic domains{1}	Basic helix-loop-helix factors (bHLH){1.2}	1.43e-42	1	#N/A	#N/A	#N/A
1303	PEAKS039920	SREBF1	ENSMUSG00000020538	Basic domains{1}	Basic helix-loop-helix factors (bHLH){1.2}	7.57e-21	1.14e-05	MA0595.1	JASPAR	SREBF1
1304	PEAKS039921	SREBF1	ENSMUSG00000020538	Basic domains{1}	Basic helix-loop-helix factors (bHLH){1.2}	0.000792	1	#N/A	#N/A	#N/A
1305	PEAKS040237	SREBF1	ENSMUSG00000020538	Basic domains{1}	Basic helix-loop-helix factors (bHLH){1.2}	1.22e-162	5.95e-08	MA0829.2	JASPAR	SREBF1
1306	PEAKS036443	SRF	ENSMUSG00000015605	α-Helices exposed by beta-structures{5}	MADS box factors{5.1}	4.96e-11	1	#N/A	#N/A	#N/A
1307	PEAKS036742	SRF	ENSMUSG00000015605	α-Helices exposed by beta-structures{5}	MADS box factors{5.1}	1.55e-219	1	#N/A	#N/A	#N/A
1308	PEAKS047267	SRF	ENSMUSG00000015605	α-Helices exposed by beta-structures{5}	MADS box factors{5.1}	3.34e-139	1	#N/A	#N/A	#N/A
1309	PEAKS047269	SRF	ENSMUSG00000015605	α-Helices exposed by beta-structures{5}	MADS box factors{5.1}	3.39e-28	1	#N/A	#N/A	#N/A
1310	PEAKS047270	SRF	ENSMUSG00000015605	α-Helices exposed by beta-structures{5}	MADS box factors{5.1}	5.44e-17	1	#N/A	#N/A	#N/A
1311	PEAKS047271	SRF	ENSMUSG00000015605	α-Helices exposed by beta-structures{5}	MADS box factors{5.1}	1.14e-97	1	#N/A	#N/A	#N/A
1312	PEAKS047272	SRF	ENSMUSG00000015605	α-Helices exposed by beta-structures{5}	MADS box factors{5.1}	2.95e-43	1	#N/A	#N/A	#N/A
1313	PEAKS047277	SRF	ENSMUSG00000015605	α-Helices exposed by beta-structures{5}	MADS box factors{5.1}	5.94e-117	1	#N/A	#N/A	#N/A
1314	PEAKS047278	SRF	ENSMUSG00000015605	α-Helices exposed by beta-structures{5}	MADS box factors{5.1}	1.75e-36	1	#N/A	#N/A	#N/A
1315	PEAKS048586	SRF	ENSMUSG00000015605	α-Helices exposed by beta-structures{5}	MADS box factors{5.1}	0	1	#N/A	#N/A	#N/A
1316	PEAKS048587	SRF	ENSMUSG00000015605	α-Helices exposed by beta-structures{5}	MADS box factors{5.1}	8.88e-178	1	#N/A	#N/A	#N/A
1317	PEAKS035277	STAT1	ENSMUSG00000026104	Immunoglobulin fold{6}	STAT domain factors{6.2}	5.05e-123	9.91e-08	MA1623.1	JASPAR	STAT2
1318	PEAKS035278	STAT1	ENSMUSG00000026104	Immunoglobulin fold{6}	STAT domain factors{6.2}	3e-44	0.806	MA0518.1	JASPAR	STAT4
1319	PEAKS035279	STAT1	ENSMUSG00000026104	Immunoglobulin fold{6}	STAT domain factors{6.2}	7.15e-184	7.79e-07	MA1623.1	JASPAR	STAT2
1320	PEAKS035280	STAT1	ENSMUSG00000026104	Immunoglobulin fold{6}	STAT domain factors{6.2}	2.81e-115	0.738	MA0520.1	JASPAR	STAT6
1321	PEAKS035281	STAT1	ENSMUSG00000026104	Immunoglobulin fold{6}	STAT domain factors{6.2}	4.19e-140	0.741	MA0520.1	JASPAR	STAT6
1322	PEAKS035347	STAT1	ENSMUSG00000026104	Immunoglobulin fold{6}	STAT domain factors{6.2}	1.19e-43	0.0181	MA0137.3	JASPAR	STAT1
1323	PEAKS035565	STAT1	ENSMUSG00000026104	Immunoglobulin fold{6}	STAT domain factors{6.2}	2.12e-15	1	#N/A	#N/A	#N/A
1324	PEAKS037797	STAT1	ENSMUSG00000026104	Immunoglobulin fold{6}	STAT domain factors{6.2}	3.94e-83	1	#N/A	#N/A	#N/A
1325	PEAKS037799	STAT1	ENSMUSG00000026104	Immunoglobulin fold{6}	STAT domain factors{6.2}	9.35e-24	1	#N/A	#N/A	#N/A
1326	PEAKS037801	STAT1	ENSMUSG00000026104	Immunoglobulin fold{6}	STAT domain factors{6.2}	1.02e-29	1	#N/A	#N/A	#N/A
1327	PEAKS037806	STAT1	ENSMUSG00000026104	Immunoglobulin fold{6}	STAT domain factors{6.2}	2.47e-94	0.000643	MA1623.1	JASPAR	STAT2
1328	PEAKS037807	STAT1	ENSMUSG00000026104	Immunoglobulin fold{6}	STAT domain factors{6.2}	5.75e-21	0.784	MA1623.1	JASPAR	STAT2
1329	PEAKS037808	STAT1	ENSMUSG00000026104	Immunoglobulin fold{6}	STAT domain factors{6.2}	7.28e-45	1	#N/A	#N/A	#N/A
1330	PEAKS040294	STAT1	ENSMUSG00000026104	Immunoglobulin fold{6}	STAT domain factors{6.2}	8.86e-278	1.03e-09	MA1625.1	JASPAR	STAT5B
1331	PEAKS040295	STAT1	ENSMUSG00000026104	Immunoglobulin fold{6}	STAT domain factors{6.2}	8.23e-299	6.17e-09	MA1625.1	JASPAR	STAT5B
1332	PEAKS040298	STAT1	ENSMUSG00000026104	Immunoglobulin fold{6}	STAT domain factors{6.2}	2.12e-110	0.00105	MA1623.1	JASPAR	STAT2
1333	PEAKS040299	STAT1	ENSMUSG00000026104	Immunoglobulin fold{6}	STAT domain factors{6.2}	0	7.34e-13	MA0518.1	JASPAR	STAT4
1334	PEAKS040300	STAT1	ENSMUSG00000026104	Immunoglobulin fold{6}	STAT domain factors{6.2}	1.12e-300	1.9e-10	MA0137.3	JASPAR	STAT1
1335	PEAKS040783	STAT1	ENSMUSG00000026104	Immunoglobulin fold{6}	STAT domain factors{6.2}	2.3e-06	1	#N/A	#N/A	#N/A
1336	PEAKS040784	STAT1	ENSMUSG00000026104	Immunoglobulin fold{6}	STAT domain factors{6.2}	1.77e-36	1	#N/A	#N/A	#N/A
1337	PEAKS040785	STAT1	ENSMUSG00000026104	Immunoglobulin fold{6}	STAT domain factors{6.2}	2.21e-06	1	#N/A	#N/A	#N/A
1338	PEAKS040789	STAT1	ENSMUSG00000026104	Immunoglobulin fold{6}	STAT domain factors{6.2}	3.2e-08	1	#N/A	#N/A	#N/A
1339	PEAKS040790	STAT1	ENSMUSG00000026104	Immunoglobulin fold{6}	STAT domain factors{6.2}	4.25e-09	1	#N/A	#N/A	#N/A
1340	PEAKS040791	STAT1	ENSMUSG00000026104	Immunoglobulin fold{6}	STAT domain factors{6.2}	0.000708	1	#N/A	#N/A	#N/A
1341	PEAKS042433	STAT1	ENSMUSG00000026104	Immunoglobulin fold{6}	STAT domain factors{6.2}	1.3e-05	1	#N/A	#N/A	#N/A
1342	PEAKS048631	STAT1	ENSMUSG00000026104	Immunoglobulin fold{6}	STAT domain factors{6.2}	5.61e-204	4.39e-07	MA1623.1	JASPAR	STAT2
1343	PEAKS048632	STAT1	ENSMUSG00000026104	Immunoglobulin fold{6}	STAT domain factors{6.2}	0	1.23e-07	MA1623.1	JASPAR	STAT2
1344	PEAKS048633	STAT1	ENSMUSG00000026104	Immunoglobulin fold{6}	STAT domain factors{6.2}	6.92e-166	0.000484	MA1623.1	JASPAR	STAT2
1345	PEAKS040786	STAT2	ENSMUSG00000040033	Immunoglobulin fold{6}	STAT domain factors{6.2}	2.17e-15	1	#N/A	#N/A	#N/A
1346	PEAKS040787	STAT2	ENSMUSG00000040033	Immunoglobulin fold{6}	STAT domain factors{6.2}	3.56e-20	1	#N/A	#N/A	#N/A
1347	PEAKS040788	STAT2	ENSMUSG00000040033	Immunoglobulin fold{6}	STAT domain factors{6.2}	1.01e-14	1	#N/A	#N/A	#N/A
1348	PEAKS040792	STAT2	ENSMUSG00000040033	Immunoglobulin fold{6}	STAT domain factors{6.2}	2.1e-13	1	#N/A	#N/A	#N/A
1349	PEAKS040793	STAT2	ENSMUSG00000040033	Immunoglobulin fold{6}	STAT domain factors{6.2}	4.1e-14	1	#N/A	#N/A	#N/A
1350	PEAKS040794	STAT2	ENSMUSG00000040033	Immunoglobulin fold{6}	STAT domain factors{6.2}	1.88e-13	1	#N/A	#N/A	#N/A
1351	PEAKS057110	STAT2	ENSMUSG00000040033	Immunoglobulin fold{6}	STAT domain factors{6.2}	0	3.05e-06	MA1623.1	JASPAR	STAT2
1352	PEAKS035900	STAT3	ENSMUSG00000004040	Immunoglobulin fold{6}	STAT domain factors{6.2}	2.06e-49	0.0012	MA1623.1	JASPAR	STAT2
1353	PEAKS035901	STAT3	ENSMUSG00000004040	Immunoglobulin fold{6}	STAT domain factors{6.2}	0.00587	1	#N/A	#N/A	#N/A
1354	PEAKS035902	STAT3	ENSMUSG00000004040	Immunoglobulin fold{6}	STAT domain factors{6.2}	0.0108	1	#N/A	#N/A	#N/A
1355	PEAKS036035	STAT3	ENSMUSG00000004040	Immunoglobulin fold{6}	STAT domain factors{6.2}	2.59e-12	1	#N/A	#N/A	#N/A
1356	PEAKS036036	STAT3	ENSMUSG00000004040	Immunoglobulin fold{6}	STAT domain factors{6.2}	1.86e-197	3.91e-10	MA0518.1	JASPAR	STAT4
1357	PEAKS036050	STAT3	ENSMUSG00000004040	Immunoglobulin fold{6}	STAT domain factors{6.2}	2.13e-61	0.00226	MA0518.1	JASPAR	STAT4
1358	PEAKS037798	STAT3	ENSMUSG00000004040	Immunoglobulin fold{6}	STAT domain factors{6.2}	4.08e-26	1	#N/A	#N/A	#N/A
1359	PEAKS037800	STAT3	ENSMUSG00000004040	Immunoglobulin fold{6}	STAT domain factors{6.2}	2.48e-145	3.99e-08	MA0518.1	JASPAR	STAT4
1360	PEAKS037802	STAT3	ENSMUSG00000004040	Immunoglobulin fold{6}	STAT domain factors{6.2}	1.27e-158	1.38e-08	MA0518.1	JASPAR	STAT4
1361	PEAKS037803	STAT3	ENSMUSG00000004040	Immunoglobulin fold{6}	STAT domain factors{6.2}	1.29e-19	1	#N/A	#N/A	#N/A
1362	PEAKS037804	STAT3	ENSMUSG00000004040	Immunoglobulin fold{6}	STAT domain factors{6.2}	2.51e-144	2.13e-09	MA0518.1	JASPAR	STAT4
1363	PEAKS037805	STAT3	ENSMUSG00000004040	Immunoglobulin fold{6}	STAT domain factors{6.2}	1.64e-156	0.926	MA1623.1	JASPAR	STAT2
1364	PEAKS040256	STAT3	ENSMUSG00000004040	Immunoglobulin fold{6}	STAT domain factors{6.2}	4.57e-155	5.7e-12	MA0518.1	JASPAR	STAT4
1365	PEAKS040258	STAT3	ENSMUSG00000004040	Immunoglobulin fold{6}	STAT domain factors{6.2}	3.46e-147	1.3e-12	MA0144.2	JASPAR	STAT3
1366	PEAKS040957	STAT3	ENSMUSG00000004040	Immunoglobulin fold{6}	STAT domain factors{6.2}	2.07e-257	3.04e-15	MA0518.1	JASPAR	STAT4
1367	PEAKS041094	STAT3	ENSMUSG00000004040	Immunoglobulin fold{6}	STAT domain factors{6.2}	1.67e-142	2.05e-10	MA0518.1	JASPAR	STAT4
1368	PEAKS041095	STAT3	ENSMUSG00000004040	Immunoglobulin fold{6}	STAT domain factors{6.2}	3.12e-135	3.82e-09	MA0518.1	JASPAR	STAT4
1369	PEAKS041096	STAT3	ENSMUSG00000004040	Immunoglobulin fold{6}	STAT domain factors{6.2}	4.54e-159	5.47e-10	MA0518.1	JASPAR	STAT4
1370	PEAKS041097	STAT3	ENSMUSG00000004040	Immunoglobulin fold{6}	STAT domain factors{6.2}	8.74e-144	1.35e-09	MA0518.1	JASPAR	STAT4
1371	PEAKS041099	STAT3	ENSMUSG00000004040	Immunoglobulin fold{6}	STAT domain factors{6.2}	7.96e-156	4.99e-10	MA0518.1	JASPAR	STAT4
1372	PEAKS041100	STAT3	ENSMUSG00000004040	Immunoglobulin fold{6}	STAT domain factors{6.2}	1.15e-150	2.74e-11	MA0144.2	JASPAR	STAT3
1373	PEAKS041101	STAT3	ENSMUSG00000004040	Immunoglobulin fold{6}	STAT domain factors{6.2}	1.19e-139	8e-08	MA0518.1	JASPAR	STAT4
1374	PEAKS041102	STAT3	ENSMUSG00000004040	Immunoglobulin fold{6}	STAT domain factors{6.2}	3.82e-154	0.957	MA1625.1	JASPAR	STAT5B
1375	PEAKS042228	STAT3	ENSMUSG00000004040	Immunoglobulin fold{6}	STAT domain factors{6.2}	8.86e-199	1.47e-10	MA0518.1	JASPAR	STAT4
1376	PEAKS049835	STAT3	ENSMUSG00000004040	Immunoglobulin fold{6}	STAT domain factors{6.2}	9.73e-278	1.11e-09	MA0137.3	JASPAR	STAT1
1377	PEAKS049836	STAT3	ENSMUSG00000004040	Immunoglobulin fold{6}	STAT domain factors{6.2}	9.63e-242	6.08e-11	MA0518.1	JASPAR	STAT4
1378	PEAKS049839	STAT3	ENSMUSG00000004040	Immunoglobulin fold{6}	STAT domain factors{6.2}	6.28e-271	1.59e-11	MA0518.1	JASPAR	STAT4
1379	PEAKS035301	STAT4	ENSMUSG00000062939	Immunoglobulin fold{6}	STAT domain factors{6.2}	8.74e-224	3.24e-14	MA0518.1	JASPAR	STAT4
1380	PEAKS042427	STAT4	ENSMUSG00000062939	Immunoglobulin fold{6}	STAT domain factors{6.2}	1.57e-140	4.2e-11	MA0518.1	JASPAR	STAT4
1381	PEAKS042428	STAT4	ENSMUSG00000062939	Immunoglobulin fold{6}	STAT domain factors{6.2}	1.89e-151	9.66e-13	MA0518.1	JASPAR	STAT4
1382	PEAKS042429	STAT4	ENSMUSG00000062939	Immunoglobulin fold{6}	STAT domain factors{6.2}	2.08e-95	0.674	MA0520.1	JASPAR	STAT6
1383	PEAKS042431	STAT4	ENSMUSG00000062939	Immunoglobulin fold{6}	STAT domain factors{6.2}	0.00201	1	#N/A	#N/A	#N/A
1384	PEAKS035252	STAT5A	ENSMUSG00000004043	Immunoglobulin fold{6}	STAT domain factors{6.2}	3.78e-09	1	#N/A	#N/A	#N/A
1385	PEAKS035288	STAT5A	ENSMUSG00000004043	Immunoglobulin fold{6}	STAT domain factors{6.2}	4.88e-76	0.669	MA1624.1	JASPAR	STAT5A
1386	PEAKS035296	STAT5A	ENSMUSG00000004043	Immunoglobulin fold{6}	STAT domain factors{6.2}	0	3.84e-11	MA0518.1	JASPAR	STAT4
1387	PEAKS035298	STAT5A	ENSMUSG00000004043	Immunoglobulin fold{6}	STAT domain factors{6.2}	0	6.11e-11	MA0518.1	JASPAR	STAT4
1388	PEAKS035639	STAT5A	ENSMUSG00000004043	Immunoglobulin fold{6}	STAT domain factors{6.2}	0	8.63e-11	MA0518.1	JASPAR	STAT4
1389	PEAKS035954	STAT5A	ENSMUSG00000004043	Immunoglobulin fold{6}	STAT domain factors{6.2}	2.14e-300	9.77e-11	MA0518.1	JASPAR	STAT4
1390	PEAKS035958	STAT5A	ENSMUSG00000004043	Immunoglobulin fold{6}	STAT domain factors{6.2}	0	2.26e-10	MA0518.1	JASPAR	STAT4
1391	PEAKS036303	STAT5A	ENSMUSG00000004043	Immunoglobulin fold{6}	STAT domain factors{6.2}	0	9.51e-10	MA1624.1	JASPAR	STAT5A
1392	PEAKS036304	STAT5A	ENSMUSG00000004043	Immunoglobulin fold{6}	STAT domain factors{6.2}	0	5.48e-09	MA0518.1	JASPAR	STAT4
1393	PEAKS036398	STAT5A	ENSMUSG00000004043	Immunoglobulin fold{6}	STAT domain factors{6.2}	0	9.66e-10	MA0518.1	JASPAR	STAT4
1394	PEAKS036399	STAT5A	ENSMUSG00000004043	Immunoglobulin fold{6}	STAT domain factors{6.2}	0	3.1e-08	MA0518.1	JASPAR	STAT4
1395	PEAKS038238	STAT5A	ENSMUSG00000004043	Immunoglobulin fold{6}	STAT domain factors{6.2}	0	1.67e-08	MA1625.1	JASPAR	STAT5B
1396	PEAKS038239	STAT5A	ENSMUSG00000004043	Immunoglobulin fold{6}	STAT domain factors{6.2}	0	2.98e-08	MA0137.3	JASPAR	STAT1
1397	PEAKS038878	STAT5A	ENSMUSG00000004043	Immunoglobulin fold{6}	STAT domain factors{6.2}	0	1.34e-09	MA0518.1	JASPAR	STAT4
1398	PEAKS038881	STAT5A	ENSMUSG00000004043	Immunoglobulin fold{6}	STAT domain factors{6.2}	1.44e-168	2.33e-10	MA0518.1	JASPAR	STAT4
1399	PEAKS039935	STAT5A	ENSMUSG00000004043	Immunoglobulin fold{6}	STAT domain factors{6.2}	1.85e-05	1	#N/A	#N/A	#N/A
1400	PEAKS039936	STAT5A	ENSMUSG00000004043	Immunoglobulin fold{6}	STAT domain factors{6.2}	0	9.31e-10	MA0518.1	JASPAR	STAT4
1401	PEAKS042584	STAT5A	ENSMUSG00000004043	Immunoglobulin fold{6}	STAT domain factors{6.2}	8.32e-15	1	#N/A	#N/A	#N/A
1402	PEAKS035299	STAT5B	ENSMUSG00000020919	Immunoglobulin fold{6}	STAT domain factors{6.2}	0	6.64e-10	MA0518.1	JASPAR	STAT4
1403	PEAKS035640	STAT5B	ENSMUSG00000020919	Immunoglobulin fold{6}	STAT domain factors{6.2}	0	1.52e-08	MA1625.1	JASPAR	STAT5B
1404	PEAKS035642	STAT5B	ENSMUSG00000020919	Immunoglobulin fold{6}	STAT domain factors{6.2}	0	3.83e-09	MA0518.1	JASPAR	STAT4
1405	PEAKS035955	STAT5B	ENSMUSG00000020919	Immunoglobulin fold{6}	STAT domain factors{6.2}	7.85e-300	2.32e-10	MA0518.1	JASPAR	STAT4
1406	PEAKS035959	STAT5B	ENSMUSG00000020919	Immunoglobulin fold{6}	STAT domain factors{6.2}	0	9.24e-11	MA0518.1	JASPAR	STAT4
1407	PEAKS042198	STAT5B	ENSMUSG00000020919	Immunoglobulin fold{6}	STAT domain factors{6.2}	0	8.74e-09	MA0518.1	JASPAR	STAT4
1408	PEAKS042200	STAT5B	ENSMUSG00000020919	Immunoglobulin fold{6}	STAT domain factors{6.2}	0	4.02e-09	MA0518.1	JASPAR	STAT4
1409	PEAKS042230	STAT5B	ENSMUSG00000020919	Immunoglobulin fold{6}	STAT domain factors{6.2}	6.47e-301	3.33e-09	MA1625.1	JASPAR	STAT5B
1410	PEAKS042231	STAT5B	ENSMUSG00000020919	Immunoglobulin fold{6}	STAT domain factors{6.2}	4.82e-220	6.68e-11	MA0518.1	JASPAR	STAT4
1411	PEAKS042232	STAT5B	ENSMUSG00000020919	Immunoglobulin fold{6}	STAT domain factors{6.2}	0	6.33e-10	MA0518.1	JASPAR	STAT4
1412	PEAKS042233	STAT5B	ENSMUSG00000020919	Immunoglobulin fold{6}	STAT domain factors{6.2}	1.95e-275	9.15e-09	MA1625.1	JASPAR	STAT5B
1413	PEAKS042234	STAT5B	ENSMUSG00000020919	Immunoglobulin fold{6}	STAT domain factors{6.2}	0	1.49e-09	MA0518.1	JASPAR	STAT4
1414	PEAKS035211	STAT6	ENSMUSG00000002147	Immunoglobulin fold{6}	STAT domain factors{6.2}	6.48e-06	1	#N/A	#N/A	#N/A
1415	PEAKS035212	STAT6	ENSMUSG00000002147	Immunoglobulin fold{6}	STAT domain factors{6.2}	9.24e-281	1.79e-11	MA0520.1	JASPAR	STAT6
1416	PEAKS040296	STAT6	ENSMUSG00000002147	Immunoglobulin fold{6}	STAT domain factors{6.2}	0	2.04e-12	MA0520.1	JASPAR	STAT6
1417	PEAKS040297	STAT6	ENSMUSG00000002147	Immunoglobulin fold{6}	STAT domain factors{6.2}	0	3.32e-10	MA0520.1	JASPAR	STAT6
1418	PEAKS042487	STAT6	ENSMUSG00000002147	Immunoglobulin fold{6}	STAT domain factors{6.2}	8.91e-294	0.0124	MA0518.1	JASPAR	STAT4
1419	PEAKS042488	STAT6	ENSMUSG00000002147	Immunoglobulin fold{6}	STAT domain factors{6.2}	2.08e-291	1.19e-13	MA0520.1	JASPAR	STAT6
1420	PEAKS042489	STAT6	ENSMUSG00000002147	Immunoglobulin fold{6}	STAT domain factors{6.2}	2.39e-264	2.3e-13	MA0520.1	JASPAR	STAT6
1421	PEAKS057572	STAT6	ENSMUSG00000002147	Immunoglobulin fold{6}	STAT domain factors{6.2}	0	2.4e-12	MA0520.1	JASPAR	STAT6
1422	PEAKS035259	TAL1	ENSMUSG00000028717	Basic domains{1}	Basic helix-loop-helix factors (bHLH){1.2}	5.2e-277	1	0	JASPAR	NA
1423	PEAKS035330	TAL1	ENSMUSG00000028717	Basic domains{1}	Basic helix-loop-helix factors (bHLH){1.2}	0	1	0	JASPAR	NA
1424	PEAKS035499	TAL1	ENSMUSG00000028717	Basic domains{1}	Basic helix-loop-helix factors (bHLH){1.2}	0	1	0	JASPAR	NA
1425	PEAKS035513	TAL1	ENSMUSG00000028717	Basic domains{1}	Basic helix-loop-helix factors (bHLH){1.2}	1.41e-178	1	0	JASPAR	NA
1426	PEAKS036143	TAL1	ENSMUSG00000028717	Basic domains{1}	Basic helix-loop-helix factors (bHLH){1.2}	0	1	0	JASPAR	NA
1427	PEAKS037158	TBP	ENSMUSG00000014767	β-Sheet binding to DNA{8}	TATA-binding proteins{8.1}	2.11e-113	1	#N/A	#N/A	#N/A
1428	PEAKS037159	TBP	ENSMUSG00000014767	β-Sheet binding to DNA{8}	TATA-binding proteins{8.1}	2.38e-96	1	#N/A	#N/A	#N/A
1429	PEAKS050777	TBP	ENSMUSG00000014767	β-Sheet binding to DNA{8}	TATA-binding proteins{8.1}	5.86e-45	1	#N/A	#N/A	#N/A
1430	PEAKS050779	TBP	ENSMUSG00000014767	β-Sheet binding to DNA{8}	TATA-binding proteins{8.1}	2.11e-39	1	#N/A	#N/A	#N/A
1431	PEAKS049348	TBR1	ENSMUSG00000035033	Immunoglobulin fold{6}	T-Box factors{6.5}	8.71e-68	0.831	MA0800.1	JASPAR	EOMES
1432	PEAKS049349	TBR1	ENSMUSG00000035033	Immunoglobulin fold{6}	T-Box factors{6.5}	2.91e-66	0.798	MA0802.1	JASPAR	TBR1
1433	PEAKS036073	TBX21	ENSMUSG00000001444	Immunoglobulin fold{6}	T-Box factors{6.5}	2.3e-105	0.199	MA0800.1	JASPAR	EOMES
1434	PEAKS040795	TBX21	ENSMUSG00000001444	Immunoglobulin fold{6}	T-Box factors{6.5}	4.17e-54	0.227	MA0800.1	JASPAR	EOMES
1435	PEAKS040796	TBX21	ENSMUSG00000001444	Immunoglobulin fold{6}	T-Box factors{6.5}	1.56e-90	9.97e-08	MA0690.2	JASPAR	TBX21
1436	PEAKS059303	TBX21	ENSMUSG00000001444	Immunoglobulin fold{6}	T-Box factors{6.5}	1.09e-40	0.17	MA0800.1	JASPAR	EOMES
1437	PEAKS035802	TBX3	ENSMUSG00000018604	Immunoglobulin fold{6}	T-Box factors{6.5}	5.34e-09	0.000297	MA0688.1	JASPAR	TBX2
1438	PEAKS057470	TBX5	ENSMUSG00000018263	Immunoglobulin fold{6}	T-Box factors{6.5}	3.52e-264	5.19e-07	MA0807.1	JASPAR	TBX5
1439	PEAKS057471	TBX5	ENSMUSG00000018263	Immunoglobulin fold{6}	T-Box factors{6.5}	1.73e-172	2.26e-07	MA0807.1	JASPAR	TBX5
1440	PEAKS057472	TBX5	ENSMUSG00000018263	Immunoglobulin fold{6}	T-Box factors{6.5}	2.62e-118	5.38e-06	MA0806.1	JASPAR	TBX4
1441	PEAKS057473	TBX5	ENSMUSG00000018263	Immunoglobulin fold{6}	T-Box factors{6.5}	3.93e-153	8.13e-07	MA0807.1	JASPAR	TBX5
1442	PEAKS057476	TBX5	ENSMUSG00000018263	Immunoglobulin fold{6}	T-Box factors{6.5}	1.96e-118	9.07e-07	MA0807.1	JASPAR	TBX5
1443	PEAKS035469	TCF12	ENSMUSG00000032228	Basic domains{1}	Basic helix-loop-helix factors (bHLH){1.2}	0	1.34e-06	MA0521.2	JASPAR	TCF12
1444	PEAKS036745	TCF3	ENSMUSG00000020167	Basic domains{1}	Basic helix-loop-helix factors (bHLH){1.2}	0	3.05e-08	MA0521.2	JASPAR	TCF12
1445	PEAKS038888	TCF3	ENSMUSG00000020167	Basic domains{1}	Basic helix-loop-helix factors (bHLH){1.2}	1.86e-170	0.000244	MA0830.2	JASPAR	TCF4
1446	PEAKS038889	TCF3	ENSMUSG00000020167	Basic domains{1}	Basic helix-loop-helix factors (bHLH){1.2}	7.8e-177	2.56e-07	MA0521.2	JASPAR	TCF12
1447	PEAKS038890	TCF3	ENSMUSG00000020167	Basic domains{1}	Basic helix-loop-helix factors (bHLH){1.2}	4.19e-147	5.11e-05	MA0830.2	JASPAR	TCF4
1448	PEAKS038891	TCF3	ENSMUSG00000020167	Basic domains{1}	Basic helix-loop-helix factors (bHLH){1.2}	1.4e-168	1.5e-05	MA0521.2	JASPAR	TCF12
1449	PEAKS038892	TCF3	ENSMUSG00000020167	Basic domains{1}	Basic helix-loop-helix factors (bHLH){1.2}	1.15e-181	1.23e-07	MA0521.2	JASPAR	TCF12
1450	PEAKS038893	TCF3	ENSMUSG00000020167	Basic domains{1}	Basic helix-loop-helix factors (bHLH){1.2}	1.03e-178	2.49e-06	MA0521.2	JASPAR	TCF12
1451	PEAKS038894	TCF3	ENSMUSG00000020167	Basic domains{1}	Basic helix-loop-helix factors (bHLH){1.2}	3.31e-164	0.0032	MA0830.2	JASPAR	TCF4
1452	PEAKS038895	TCF3	ENSMUSG00000020167	Basic domains{1}	Basic helix-loop-helix factors (bHLH){1.2}	1.72e-173	2.35e-05	MA0521.2	JASPAR	TCF12
1453	PEAKS038896	TCF3	ENSMUSG00000020167	Basic domains{1}	Basic helix-loop-helix factors (bHLH){1.2}	2.97e-89	0.462	MA0522.3	JASPAR	TCF3
1454	PEAKS038897	TCF3	ENSMUSG00000020167	Basic domains{1}	Basic helix-loop-helix factors (bHLH){1.2}	4.61e-141	5.51e-05	MA0521.2	JASPAR	TCF12
1455	PEAKS039238	TCF3	ENSMUSG00000020167	Basic domains{1}	Basic helix-loop-helix factors (bHLH){1.2}	1.68e-280	8.72e-05	MA0521.2	JASPAR	TCF12
1456	PEAKS039239	TCF3	ENSMUSG00000020167	Basic domains{1}	Basic helix-loop-helix factors (bHLH){1.2}	8.2e-281	1.91e-06	MA0521.2	JASPAR	TCF12
1457	PEAKS049613	TCF3	ENSMUSG00000020167	Basic domains{1}	Basic helix-loop-helix factors (bHLH){1.2}	1.24e-280	4.39e-05	MA0830.2	JASPAR	TCF4
1458	PEAKS049614	TCF3	ENSMUSG00000020167	Basic domains{1}	Basic helix-loop-helix factors (bHLH){1.2}	4.48e-184	2.79e-05	MA0521.2	JASPAR	TCF12
1459	PEAKS036253	TCF7	ENSMUSG00000000782	Other all-alpha-helical DNA-binding domains{4}	High-mobility group (HMG) domain factors{4.1}	9.27e-142	9.12e-14	MA0523.1	JASPAR	TCF7L2
1460	PEAKS036254	TCF7	ENSMUSG00000000782	Other all-alpha-helical DNA-binding domains{4}	High-mobility group (HMG) domain factors{4.1}	7.83e-150	2.94e-11	MA0523.1	JASPAR	TCF7L2
1461	PEAKS035805	TCF7L2	ENSMUSG00000024985	Other all-alpha-helical DNA-binding domains{4}	High-mobility group (HMG) domain factors{4.1}	2.8e-217	1.4e-14	MA0523.1	JASPAR	TCF7L2
1462	PEAKS037791	TCF7L2	ENSMUSG00000024985	Other all-alpha-helical DNA-binding domains{4}	High-mobility group (HMG) domain factors{4.1}	6.64e-210	6.04e-13	MA0523.1	JASPAR	TCF7L2
1463	PEAKS039250	TEAD1	ENSMUSG00000055320	Helix-turn-helix domains{3}	TEA domain factors{3.6}	5.31e-306	2.26e-08	MA0808.1	JASPAR	TEAD3
1464	PEAKS039251	TEAD1	ENSMUSG00000055320	Helix-turn-helix domains{3}	TEA domain factors{3.6}	0	5.6e-11	MA0090.3	JASPAR	TEAD1
1465	PEAKS049506	TEAD4	ENSMUSG00000030353	Helix-turn-helix domains{3}	TEA domain factors{3.6}	0	3.98e-11	MA0090.3	JASPAR	TEAD1
1466	PEAKS049507	TEAD4	ENSMUSG00000030353	Helix-turn-helix domains{3}	TEA domain factors{3.6}	8.5e-283	1.72e-09	MA0090.3	JASPAR	TEAD1
1467	PEAKS049510	TEAD4	ENSMUSG00000030353	Helix-turn-helix domains{3}	TEA domain factors{3.6}	0	4.93e-11	MA0090.3	JASPAR	TEAD1
1468	PEAKS049511	TEAD4	ENSMUSG00000030353	Helix-turn-helix domains{3}	TEA domain factors{3.6}	0	1.37e-08	MA0090.3	JASPAR	TEAD1
1469	PEAKS055535	TET2	ENSMUSG00000040943	Zinc-coordinating DNA-binding domains{2}	CXXC zinc finger factors{2.6}	1	1	0	JASPAR	NA
1470	PEAKS036276	TFAP2A	ENSMUSG00000021359	Basic domains{1}	Basic helix-span-helix factors (bHSH){1.3}	3.31e-230	2.56e-07	MA0003.4	JASPAR	TFAP2A
1471	PEAKS036280	TFAP2A	ENSMUSG00000021359	Basic domains{1}	Basic helix-span-helix factors (bHSH){1.3}	2.9e-133	2.11e-10	MA0003.4	JASPAR	TFAP2A
1472	PEAKS036290	TFAP2A	ENSMUSG00000021359	Basic domains{1}	Basic helix-span-helix factors (bHSH){1.3}	2.83e-276	1.46e-06	MA1569.1	JASPAR	TFAP2E
1473	PEAKS036291	TFAP2A	ENSMUSG00000021359	Basic domains{1}	Basic helix-span-helix factors (bHSH){1.3}	2.17e-243	1.53e-08	MA0003.4	JASPAR	TFAP2A
1474	PEAKS036665	TFAP4	ENSMUSG00000005718	Basic domains{1}	Basic helix-loop-helix factors (bHLH){1.2}	7.9e-183	7.93e-06	MA0691.1	JASPAR	TFAP4
1475	PEAKS055119	THRA	ENSMUSG00000058756	Zinc-coordinating DNA-binding domains{2}	Nuclear receptors with C4 zinc fingers{2.1}	6.08e-260	1.41e-07	MA1969.1	JASPAR	THRA
1476	PEAKS038329	TRP53	ENSMUSG00000059552	Immunoglobulin fold{6}	p53 domain factors{6.3}	9.01e-172	5.18e-13	MA0106.3	JASPAR	TP53
1477	PEAKS038330	TRP53	ENSMUSG00000059552	Immunoglobulin fold{6}	p53 domain factors{6.3}	0	6.45e-14	MA0106.3	JASPAR	TP53
1478	PEAKS039947	TRP53	ENSMUSG00000059552	Immunoglobulin fold{6}	p53 domain factors{6.3}	4.92e-56	1	#N/A	#N/A	#N/A
1479	PEAKS039948	TRP53	ENSMUSG00000059552	Immunoglobulin fold{6}	p53 domain factors{6.3}	4.14e-05	1	#N/A	#N/A	#N/A
1480	PEAKS039949	TRP53	ENSMUSG00000059552	Immunoglobulin fold{6}	p53 domain factors{6.3}	1.83e-07	1	#N/A	#N/A	#N/A
1481	PEAKS039950	TRP53	ENSMUSG00000059552	Immunoglobulin fold{6}	p53 domain factors{6.3}	3.39e-07	1	#N/A	#N/A	#N/A
1482	PEAKS039951	TRP53	ENSMUSG00000059552	Immunoglobulin fold{6}	p53 domain factors{6.3}	0	1.26e-08	MA0106.3	JASPAR	TP53
1483	PEAKS039952	TRP53	ENSMUSG00000059552	Immunoglobulin fold{6}	p53 domain factors{6.3}	0	2.66e-13	MA0106.3	JASPAR	TP53
1484	PEAKS039953	TRP53	ENSMUSG00000059552	Immunoglobulin fold{6}	p53 domain factors{6.3}	1.97e-236	4.98e-12	MA0106.3	JASPAR	TP53
1485	PEAKS039954	TRP53	ENSMUSG00000059552	Immunoglobulin fold{6}	p53 domain factors{6.3}	1.93e-52	1	#N/A	#N/A	#N/A
1486	PEAKS039955	TRP53	ENSMUSG00000059552	Immunoglobulin fold{6}	p53 domain factors{6.3}	0	7.91e-14	MA0106.3	JASPAR	TP53
1487	PEAKS039956	TRP53	ENSMUSG00000059552	Immunoglobulin fold{6}	p53 domain factors{6.3}	0	4.57e-14	MA0106.3	JASPAR	TP53
1488	PEAKS039958	TRP53	ENSMUSG00000059552	Immunoglobulin fold{6}	p53 domain factors{6.3}	0	1.1e-13	MA0106.3	JASPAR	TP53
1489	PEAKS039959	TRP53	ENSMUSG00000059552	Immunoglobulin fold{6}	p53 domain factors{6.3}	0	4.47e-09	MA0106.3	JASPAR	TP53
1490	PEAKS039960	TRP53	ENSMUSG00000059552	Immunoglobulin fold{6}	p53 domain factors{6.3}	0	1.63e-08	MA0106.3	JASPAR	TP53
1491	PEAKS039961	TRP53	ENSMUSG00000059552	Immunoglobulin fold{6}	p53 domain factors{6.3}	0	2.05e-08	MA0106.3	JASPAR	TP53
1492	PEAKS039962	TRP53	ENSMUSG00000059552	Immunoglobulin fold{6}	p53 domain factors{6.3}	0	5.41e-08	MA0106.3	JASPAR	TP53
1493	PEAKS039963	TRP53	ENSMUSG00000059552	Immunoglobulin fold{6}	p53 domain factors{6.3}	0	1.19e-12	MA0106.3	JASPAR	TP53
1494	PEAKS039964	TRP53	ENSMUSG00000059552	Immunoglobulin fold{6}	p53 domain factors{6.3}	0	7.87e-08	MA0106.3	JASPAR	TP53
1495	PEAKS039965	TRP53	ENSMUSG00000059552	Immunoglobulin fold{6}	p53 domain factors{6.3}	0	1.36e-13	MA0106.3	JASPAR	TP53
1496	PEAKS039966	TRP53	ENSMUSG00000059552	Immunoglobulin fold{6}	p53 domain factors{6.3}	0	1.27e-13	MA0106.3	JASPAR	TP53
1497	PEAKS039967	TRP53	ENSMUSG00000059552	Immunoglobulin fold{6}	p53 domain factors{6.3}	0	5.35e-12	MA0106.3	JASPAR	TP53
1498	PEAKS039968	TRP53	ENSMUSG00000059552	Immunoglobulin fold{6}	p53 domain factors{6.3}	0	2.04e-14	MA0106.3	JASPAR	TP53
1499	PEAKS039969	TRP53	ENSMUSG00000059552	Immunoglobulin fold{6}	p53 domain factors{6.3}	0	2.45e-13	MA0106.3	JASPAR	TP53
1500	PEAKS039970	TRP53	ENSMUSG00000059552	Immunoglobulin fold{6}	p53 domain factors{6.3}	0	8.38e-12	MA0106.3	JASPAR	TP53
1501	PEAKS039971	TRP53	ENSMUSG00000059552	Immunoglobulin fold{6}	p53 domain factors{6.3}	0	2.82e-13	MA0106.3	JASPAR	TP53
1502	PEAKS039972	TRP53	ENSMUSG00000059552	Immunoglobulin fold{6}	p53 domain factors{6.3}	0	7.38e-13	MA0106.3	JASPAR	TP53
1503	PEAKS042188	TRP53	ENSMUSG00000059552	Immunoglobulin fold{6}	p53 domain factors{6.3}	2.01e-184	0.349	MA0106.3	JASPAR	TP53
1504	PEAKS042189	TRP53	ENSMUSG00000059552	Immunoglobulin fold{6}	p53 domain factors{6.3}	6.08e-220	1.33e-08	MA0106.3	JASPAR	TP53
1505	PEAKS042190	TRP53	ENSMUSG00000059552	Immunoglobulin fold{6}	p53 domain factors{6.3}	0	4.82e-13	MA0106.3	JASPAR	TP53
1506	PEAKS042191	TRP53	ENSMUSG00000059552	Immunoglobulin fold{6}	p53 domain factors{6.3}	0	1.08e-09	MA0106.3	JASPAR	TP53
1507	PEAKS055154	TWIST2	ENSMUSG00000007805	Basic domains{1}	Basic helix-loop-helix factors (bHLH){1.2}	3.7e-31	0.00307	MA1467.2	JASPAR	ATOH1
1508	PEAKS055155	TWIST2	ENSMUSG00000007805	Basic domains{1}	Basic helix-loop-helix factors (bHLH){1.2}	1.26e-05	0.0498	MA1635.1	JASPAR	BHLHE22
1509	PEAKS055158	TWIST2	ENSMUSG00000007805	Basic domains{1}	Basic helix-loop-helix factors (bHLH){1.2}	1.7e-253	7.53e-09	MA1123.2	JASPAR	TWIST1
1510	PEAKS055160	TWIST2	ENSMUSG00000007805	Basic domains{1}	Basic helix-loop-helix factors (bHLH){1.2}	7.6e-233	4.87e-06	MA1123.2	JASPAR	TWIST1
1511	PEAKS035508	USF1	ENSMUSG00000026641	Basic domains{1}	Basic helix-loop-helix factors (bHLH){1.2}	0	2.38e-12	MA0692.1	JASPAR	TFEB
1512	PEAKS049126	USF2	ENSMUSG00000058239	Basic domains{1}	Basic helix-loop-helix factors (bHLH){1.2}	0	1.47e-10	MA0692.1	JASPAR	TFEB
1513	PEAKS049127	USF2	ENSMUSG00000058239	Basic domains{1}	Basic helix-loop-helix factors (bHLH){1.2}	0	1.35e-09	MA0692.1	JASPAR	TFEB
1514	PEAKS038136	VDR	ENSMUSG00000022479	Zinc-coordinating DNA-binding domains{2}	Nuclear receptors with C4 zinc fingers{2.1}	1.88e-227	8.31e-11	MA1533.1	JASPAR	NR1I2
1515	PEAKS038137	VDR	ENSMUSG00000022479	Zinc-coordinating DNA-binding domains{2}	Nuclear receptors with C4 zinc fingers{2.1}	1.79e-271	4.07e-09	MA1533.1	JASPAR	NR1I2
1516	PEAKS039017	VDR	ENSMUSG00000022479	Zinc-coordinating DNA-binding domains{2}	Nuclear receptors with C4 zinc fingers{2.1}	9.97e-18	1	#N/A	#N/A	#N/A
1517	PEAKS039018	VDR	ENSMUSG00000022479	Zinc-coordinating DNA-binding domains{2}	Nuclear receptors with C4 zinc fingers{2.1}	4.38e-204	2.59e-11	MA1533.1	JASPAR	NR1I2
1518	PEAKS039026	VDR	ENSMUSG00000022479	Zinc-coordinating DNA-binding domains{2}	Nuclear receptors with C4 zinc fingers{2.1}	1.2e-176	3.97e-10	MA1533.1	JASPAR	NR1I2
1519	PEAKS039033	VDR	ENSMUSG00000022479	Zinc-coordinating DNA-binding domains{2}	Nuclear receptors with C4 zinc fingers{2.1}	8.07e-06	1	#N/A	#N/A	#N/A
1520	PEAKS039034	VDR	ENSMUSG00000022479	Zinc-coordinating DNA-binding domains{2}	Nuclear receptors with C4 zinc fingers{2.1}	5.02e-173	6.42e-07	MA1533.1	JASPAR	NR1I2
1521	PEAKS039040	VDR	ENSMUSG00000022479	Zinc-coordinating DNA-binding domains{2}	Nuclear receptors with C4 zinc fingers{2.1}	6.5e-128	1.64e-11	MA1533.1	JASPAR	NR1I2
1522	PEAKS050751	VDR	ENSMUSG00000022479	Zinc-coordinating DNA-binding domains{2}	Nuclear receptors with C4 zinc fingers{2.1}	8.22e-22	1	#N/A	#N/A	#N/A
1523	PEAKS050752	VDR	ENSMUSG00000022479	Zinc-coordinating DNA-binding domains{2}	Nuclear receptors with C4 zinc fingers{2.1}	1.71e-177	0.0102	MA1151.1	JASPAR	RORC
1524	PEAKS039190	VSX2	ENSMUSG00000021239	Helix-turn-helix domains{3}	Homeo domain factors{3.1}	0	0.00017	MA0662.1	JASPAR	MIXL1
1525	PEAKS038833	WIZ	ENSMUSG00000024050	Zinc-coordinating DNA-binding domains{2}	C2H2 zinc finger factors{2.3}	1	1	0	JASPAR	NA
1526	PEAKS037674	WT1	ENSMUSG00000016458	Zinc-coordinating DNA-binding domains{2}	C2H2 zinc finger factors{2.3}	1.55e-217	0.000585	MA1627.1	JASPAR	WT1
1527	PEAKS049625	WT1	ENSMUSG00000016458	Zinc-coordinating DNA-binding domains{2}	C2H2 zinc finger factors{2.3}	1.24e-222	9.96e-12	MA1627.1	JASPAR	WT1
1528	PEAKS040238	XBP1	ENSMUSG00000020484	Basic domains{1}	Basic leucine zipper factors (bZIP){1.1}	4.26e-83	1	#N/A	#N/A	#N/A
1529	PEAKS040240	XBP1	ENSMUSG00000020484	Basic domains{1}	Basic leucine zipper factors (bZIP){1.1}	3.04e-140	1	#N/A	#N/A	#N/A
1530	PEAKS040241	XBP1	ENSMUSG00000020484	Basic domains{1}	Basic leucine zipper factors (bZIP){1.1}	1.64e-138	1	#N/A	#N/A	#N/A
1531	PEAKS040242	XBP1	ENSMUSG00000020484	Basic domains{1}	Basic leucine zipper factors (bZIP){1.1}	1.25e-106	1	#N/A	#N/A	#N/A
1532	PEAKS040244	XBP1	ENSMUSG00000020484	Basic domains{1}	Basic leucine zipper factors (bZIP){1.1}	2.53e-154	1	#N/A	#N/A	#N/A
1533	PEAKS040245	XBP1	ENSMUSG00000020484	Basic domains{1}	Basic leucine zipper factors (bZIP){1.1}	9.83e-95	1	#N/A	#N/A	#N/A
1534	PEAKS036085	YY1	ENSMUSG00000021264	Zinc-coordinating DNA-binding domains{2}	C2H2 zinc finger factors{2.3}	0	9.39e-10	MA1651.1	JASPAR	ZFP42
1535	PEAKS038524	YY1	ENSMUSG00000021264	Zinc-coordinating DNA-binding domains{2}	C2H2 zinc finger factors{2.3}	0	1.61e-08	MA1651.1	JASPAR	ZFP42
1536	PEAKS038525	YY1	ENSMUSG00000021264	Zinc-coordinating DNA-binding domains{2}	C2H2 zinc finger factors{2.3}	0	6.86e-11	MA1651.1	JASPAR	ZFP42
1537	PEAKS038526	YY1	ENSMUSG00000021264	Zinc-coordinating DNA-binding domains{2}	C2H2 zinc finger factors{2.3}	0	9.29e-09	MA1651.1	JASPAR	ZFP42
1538	PEAKS038527	YY1	ENSMUSG00000021264	Zinc-coordinating DNA-binding domains{2}	C2H2 zinc finger factors{2.3}	0	3.21e-11	MA1651.1	JASPAR	ZFP42
1539	PEAKS038513	ZBTB16	ENSMUSG00000066687	Zinc-coordinating DNA-binding domains{2}	C2H2 zinc finger factors{2.3}	1	1	0	JASPAR	NA
1540	PEAKS038514	ZBTB16	ENSMUSG00000066687	Zinc-coordinating DNA-binding domains{2}	C2H2 zinc finger factors{2.3}	1	1	0	JASPAR	NA
1541	PEAKS038515	ZBTB16	ENSMUSG00000066687	Zinc-coordinating DNA-binding domains{2}	C2H2 zinc finger factors{2.3}	1	1	0	JASPAR	NA
1542	PEAKS039142	ZBTB16	ENSMUSG00000066687	Zinc-coordinating DNA-binding domains{2}	C2H2 zinc finger factors{2.3}	1	1	0	JASPAR	NA
1543	PEAKS039143	ZBTB16	ENSMUSG00000066687	Zinc-coordinating DNA-binding domains{2}	C2H2 zinc finger factors{2.3}	1	1	0	JASPAR	NA
1544	PEAKS036489	ZBTB17	ENSMUSG00000006215	Zinc-coordinating DNA-binding domains{2}	C2H2 zinc finger factors{2.3}	1	0.000114	MA1652.1	JASPAR	ZKSCAN5
1545	PEAKS036490	ZBTB17	ENSMUSG00000006215	Zinc-coordinating DNA-binding domains{2}	C2H2 zinc finger factors{2.3}	1	6.43e-05	MA1961.1	JASPAR	PATZ1
1546	PEAKS059294	ZBTB7B	ENSMUSG00000028042	Zinc-coordinating DNA-binding domains{2}	C2H2 zinc finger factors{2.3}	5.73e-51	0.00747	MA1102.2	JASPAR	CTCFL
1547	PEAKS039167	ZFAT	ENSMUSG00000022335	Zinc-coordinating DNA-binding domains{2}	C2H2 zinc finger factors{2.3}	1	0.108	MA1982.1	JASPAR	ZNF574
1548	PEAKS037378	ZIC1	ENSMUSG00000032368	Zinc-coordinating DNA-binding domains{2}	C2H2 zinc finger factors{2.3}	7.46e-58	0.00255	MA1721.1	JASPAR	ZNF93
1549	PEAKS037379	ZIC1	ENSMUSG00000032368	Zinc-coordinating DNA-binding domains{2}	C2H2 zinc finger factors{2.3}	3.45e-111	0.000192	MA1721.1	JASPAR	ZNF93
1550	PEAKS042519	ZFP652	ENSMUSG00000075595	Zinc-coordinating DNA-binding domains{2}	C2H2 zinc finger factors{2.3}	7.37e-28	0.115	MA1602.1	JASPAR	ZSCAN29
1551	PEAKS042520	ZFP652	ENSMUSG00000075595	Zinc-coordinating DNA-binding domains{2}	C2H2 zinc finger factors{2.3}	1e-28	0.0175	MA1650.1	JASPAR	ZBTB14
1552	PEAKS042521	ZFP652	ENSMUSG00000075595	Zinc-coordinating DNA-binding domains{2}	C2H2 zinc finger factors{2.3}	5.09e-50	0.0435	MA0863.1	JASPAR	MTF1
1553	PEAKS042522	ZFP652	ENSMUSG00000075595	Zinc-coordinating DNA-binding domains{2}	C2H2 zinc finger factors{2.3}	1.69e-34	0.0178	MA1155.1	JASPAR	ZSCAN4

## Sheet: Table_S2
Table S2. The filtration of the benchmark collection of 121 ChIP-seq datasets of A. thaliana. For each dataset, we provide GTRD ID (Kolmykov et al., 2021), the target TF name, Locus name from TAIR, and the names of its superclass and class (TFClass, Wingender et al., 2015, 2018; Plant-TFClass, Blanc-Mathieu et al., 2023). The AME p-value (McLeay and Bailey, 2010) marks the enrichment of known mot…
#	GTRD			Plant-TFClass		P-value, AME	PWM
	ID	TF	TAIR Locus	Superclass	Class		P-value, TomTom	Motif ID	Database	TF Name in database
1	PEAKS042938	ABF1	AT1G49720	Basic domains{1}	Basic leucine zipper factors (bZIP){1.1}	0	8.68e-10	M01161	CIS-BP	EEL
2	PEAKS042939	ABF1	AT1G49720	Basic domains{1}	Basic leucine zipper factors (bZIP){1.1}	0	4.18e-10	M01161	CIS-BP	EEL
3	PEAKS042900	ABF3	AT4G34000	Basic domains{1}	Basic leucine zipper factors (bZIP){1.1}	0	3.79e-11	M01056	CIS-BP	ABF4
4	PEAKS042901	ABF3	AT4G34000	Basic domains{1}	Basic leucine zipper factors (bZIP){1.1}	0	1.61e-10	M01056	CIS-BP	ABF4
5	PEAKS042902	ABF4	AT3G19290	Basic domains{1}	Basic leucine zipper factors (bZIP){1.1}	0	1.88e-10	M01161	CIS-BP	EEL
6	PEAKS042903	ABF4	AT3G19290	Basic domains{1}	Basic leucine zipper factors (bZIP){1.1}	0	2.08e-11	M08407	CIS-BP	HY5
7	PEAKS042822	AGL27	AT1G77080	α-Helices exposed by β-structures{5}	MADS box factors{5.1}	8.94e-154	5.29e-22	M08147	CIS-BP	AGL14
8	PEAKS042554	AGL8	AT5G60910	α-Helices exposed by β-structures{5}	MADS box factors{5.1}	1.04e-123	0.179	M08148	CIS-BP	AGL18
9	PEAKS042897	AGL8	AT5G60910	α-Helices exposed by β-structures{5}	MADS box factors{5.1}	2.24e-107	0.9	M08425	CIS-BP	CAL
10	PEAKS042553	AGL8	AT5G60910	α-Helices exposed by β-structures{5}	MADS box factors{5.1}	2.78e-216	4.17e-13	M08146	CIS-BP	AP3
11	PEAKS042817	AP1	AT1G69120	α-Helices exposed by β-structures{5}	MADS box factors{5.1}	3.68e-77	9.03e-12	M08146	CIS-BP	AP3
12	PEAKS042819	AP1	AT1G69120	α-Helices exposed by β-structures{5}	MADS box factors{5.1}	2.21e-49	5.75e-13	M08425	CIS-BP	CAL
13	PEAKS042818	AP1	AT1G69120	α-Helices exposed by β-structures{5}	MADS box factors{5.1}	1.01e-71	0.0721	M08143	CIS-BP	SEP3
14	PEAKS042765	AP2	AT4G36920	β-Hairpin exposed by an α/β-scaffold{7}	AP2/EREBP{7.*}	1e-08	0.0917	M00851	CIS-BP	SNZ
15	PEAKS042831	ARF6	AT1G30330	β-Barrel DNA-binding domains{9}	B3{9.*}	1.09e-97	0.0159	UN0687.1	JASPAR	NGA4
16	PEAKS046124	ARR1	AT3G16857	Helix-turn-helix domains{3}	Tryptophan cluster factors{3.5}	1.11e-09	0.217	MA1392.2	JASPAR	MYB98
17	PEAKS046126	ARR1	AT3G16857	Helix-turn-helix domains{3}	Tryptophan cluster factors{3.5}	1	0.0174	M01286	CIS-BP	ATMYB102
18	PEAKS046127	ARR1	AT3G16857	Helix-turn-helix domains{3}	Tryptophan cluster factors{3.5}	9.12e-103	0.159	MA2042.1	JASPAR	MYB58
19	PEAKS046128	ARR1	AT3G16857	Helix-turn-helix domains{3}	Tryptophan cluster factors{3.5}	1.33e-07	0.0414	MA2028.1	JASPAR	MYB49
20	PEAKS046125	ARR1	AT3G16857	Helix-turn-helix domains{3}	Tryptophan cluster factors{3.5}	3.86e-23	0.363	M02700	CIS-BP	RAX2
21	PEAKS046123	ARR1	AT3G16857	Helix-turn-helix domains{3}	Tryptophan cluster factors{3.5}	4.12e-20	0.117	M02288	CIS-BP	MYB3
22	PEAKS046129	ARR10	AT4G31920	Helix-turn-helix domains{3}	Tryptophan cluster factors{3.5}	1.08e-42	0.146	M02301	CIS-BP	MYB98
23	PEAKS046131	ARR12	AT2G25180	Helix-turn-helix domains{3}	Tryptophan cluster factors{3.5}	1.05e-13	0.0737	MA1392.2	JASPAR	MYB98
24	PEAKS046130	ARR12	AT2G25180	Helix-turn-helix domains{3}	Tryptophan cluster factors{3.5}	3.5e-05	0.0331	M02311	CIS-BP	MYB305
25	PEAKS046132	ARR14	AT2G01760	Helix-turn-helix domains{3}	Tryptophan cluster factors{3.5}	6.41e-91	0.00275	M02311	CIS-BP	MYB305
26	PEAKS042907	AT5G04760	AT5G04760	Helix-turn-helix domains{3}	Tryptophan cluster factors{3.5}	4.95e-132	2.86e-06	M02312	CIS-BP	AT1G70000
27	PEAKS042906	AT5G04760	AT5G04760	Helix-turn-helix domains{3}	Tryptophan cluster factors{3.5}	3.52e-119	0.0179	M02701	CIS-BP	F3A4.140
28	PEAKS042912	ATHB-5	AT5G65310	Helix-turn-helix domains{3}	Homeo domain factors{3.1}	4.71e-264	1.38e-06	M02684	CIS-BP	ATHB-23
29	PEAKS042913	ATHB-5	AT5G65310	Helix-turn-helix domains{3}	Homeo domain factors{3.1}	2.14e-259	4.15e-07	M02684	CIS-BP	ATHB-23
30	PEAKS042910	ATHB-6	AT2G22430	Helix-turn-helix domains{3}	Homeo domain factors{3.1}	1.64e-25	0.169	M01238	CIS-BP	BLH10
31	PEAKS042911	ATHB-6	AT2G22430	Helix-turn-helix domains{3}	Homeo domain factors{3.1}	8.71e-29	0.00452	M03094	CIS-BP	BLH10
32	PEAKS042904	ATHB-7	AT2G46680	Helix-turn-helix domains{3}	Homeo domain factors{3.1}	7.67e-212	2.11e-07	M02684	CIS-BP	ATHB-23
33	PEAKS042905	ATHB-7	AT2G46680	Helix-turn-helix domains{3}	Homeo domain factors{3.1}	1.23e-240	2.04e-06	M02043	CIS-BP	ATHB-7
34	PEAKS042945	AZF1	AT5G67450	Zinc-coordinating DNA-binding domains{2}	C2H2 zinc finger factors{2.3}	1.58e-16	0.094	M08081	CIS-BP	REF6
35	PEAKS042833	BBM	AT5G17430	β-Hairpin exposed by an α/β-scaffold{7}	AP2/EREBP{7.*}	1.6e-30	0.133	M08402	CIS-BP	SNZ
36	PEAKS042834	BBM	AT5G17430	β-Hairpin exposed by an α/β-scaffold{7}	AP2/EREBP{7.*}	1.19e-30	0.174	M00848	CIS-BP	CRF5
37	PEAKS042924	BHLH122	AT1G51140	Basic domains{1}	Basic helix-loop-helix factors (bHLH){1.2}	1.63e-126	5.2e-10	MA0965.2	JASPAR	BIM2
38	PEAKS042925	BHLH122	AT1G51140	Basic domains{1}	Basic helix-loop-helix factors (bHLH){1.2}	5.95e-152	3.02e-08	M08404	CIS-BP	PIF1
39	PEAKS042946	BPC1	AT2G01930	Yet undefined DNA-binding domains{0}	BBR/BPC{0.*}	1	1	NA	NA	NA
40	PEAKS042881	CCA1	AT2G46830	Helix-turn-helix domains{3}	Tryptophan cluster factors{3.5}	4.01e-245	1.16e-06	MA0972.1	JASPAR	CCA1
41	PEAKS042882	CCA1	AT2G46830	Helix-turn-helix domains{3}	Tryptophan cluster factors{3.5}	1.06e-277	4.19e-05	M00879	CIS-BP	RVE1
42	PEAKS042920	DREB2A	AT5G05410	β-Hairpin exposed by an α/β-scaffold{7}	AP2/EREBP{7.*}	5.78e-20	1.16e-05	M01097	CIS-BP	AT2G40350
43	PEAKS042921	DREB2A	AT5G05410	β-Hairpin exposed by an α/β-scaffold{7}	AP2/EREBP{7.*}	3.31e-281	4.05e-08	M01097	CIS-BP	AT2G40350
44	PEAKS042826	ERF115	AT5G07310	β-Hairpin exposed by an α/β-scaffold{7}	AP2/EREBP{7.*}	2.41e-128	2.6e-07	M01100	CIS-BP	ESR1
45	PEAKS042875	FHY3	AT3G22170	β-Hairpin exposed by an α/β-scaffold{7}	GCM domain factors{7.2}	1	2.86e-08	M09540	CIS-BP	FHY3
46	PEAKS042982	GATA21	AT5G56860	Zinc-coordinating DNA-binding domains{2}	Other C4 zinc finger-type factors{2.2}	1	0.224	M02003	CIS-BP	GATA13
47	PEAKS042983	GATA22	AT4G26150	Zinc-coordinating DNA-binding domains{2}	Other C4 zinc finger-type factors{2.2}	1	0.00115	M02000	CIS-BP	GATA13
48	PEAKS042928	GBF2	AT4G01120	Basic domains{1}	Basic leucine zipper factors (bZIP){1.1}	0	3.05e-12	M01133	CIS-BP	ATBZIP27
49	PEAKS042929	GBF2	AT4G01120	Basic domains{1}	Basic leucine zipper factors (bZIP){1.1}	0	1.38e-12	M01133	CIS-BP	ATBZIP27
50	PEAKS042937	GBF3	AT2G46270	Basic domains{1}	Basic leucine zipper factors (bZIP){1.1}	0	2.31e-10	M01058	CIS-BP	ATBZIP27
51	PEAKS042936	GBF3	AT2G46270	Basic domains{1}	Basic leucine zipper factors (bZIP){1.1}	0	1.45e-10	M01058	CIS-BP	ATBZIP27
52	PEAKS042927	HAT22	AT4G37790	Helix-turn-helix domains{3}	Homeo domain factors{3.1}	1.47e-233	7.56e-06	M02047	CIS-BP	ATHB-17
53	PEAKS042926	HAT22	AT4G37790	Helix-turn-helix domains{3}	Homeo domain factors{3.1}	2.34e-213	1.11e-07	M02043	CIS-BP	ATHB-7
54	PEAKS042890	HSFA1A	AT4G17750	Helix-turn-helix domains{3}	Heat shock factors{3.4}	1.45e-16	0.0839	M00869	CIS-BP	HSFA1D
55	PEAKS042892	HSFA1A	AT4G17750	Helix-turn-helix domains{3}	Heat shock factors{3.4}	2.6e-37	3.39e-06	MA1665.2	JASPAR	HSFB2A
56	PEAKS042891	HSFA1A	AT4G17750	Helix-turn-helix domains{3}	Heat shock factors{3.4}	1.02e-16	0.128	M00869	CIS-BP	HSFA1D
57	PEAKS046116	HSFA1B	AT5G16820	Helix-turn-helix domains{3}	Heat shock factors{3.4}	3.06e-39	0.849	M00869	CIS-BP	HSFA1D
58	PEAKS046117	HSFA1B	AT5G16820	Helix-turn-helix domains{3}	Heat shock factors{3.4}	1.01e-35	0.543	M00868	CIS-BP	HSFA1D
59	PEAKS042917	HSFA6A	AT5G43840	Helix-turn-helix domains{3}	Heat shock factors{3.4}	1.62e-221	1.11e-06	MA1665.2	JASPAR	HSFB2A
60	PEAKS046122	HY5	AT5G11260	Basic domains{1}	Basic leucine zipper factors (bZIP){1.1}	0	1.14e-10	M01133	CIS-BP	ATBZIP27
61	PEAKS046121	HY5	AT5G11260	Basic domains{1}	Basic leucine zipper factors (bZIP){1.1}	0	1.25e-10	M01133	CIS-BP	ATBZIP27
62	PEAKS050107	IDD4	AT2G02080	Zinc-coordinating DNA-binding domains{2}	C2H2 zinc finger factors{2.3}	9.4e-117	4.94e-05	M01061	CIS-BP	IDD2
63	PEAKS042821	KAN1	AT5G16560	Helix-turn-helix domains{3}	Tryptophan cluster factors{3.5}	4.35e-53	0.0106	M01283	CIS-BP	AT2G02060
64	PEAKS042981	LFY	AT5G61850	Helix-turn-helix domains{3}	LEAFY{3.*}	1	6.48e-07	M02692	CIS-BP	LFY
65	PEAKS042832	LHY	AT1G01060	Helix-turn-helix domains{3}	Tryptophan cluster factors{3.5}	5.86e-252	2.17e-07	M01081	CIS-BP	AT1G01520
66	PEAKS056070	MBD9	AT3G01460	Zinc-coordinating DNA-binding domains{2}	CXXC zinc finger factors{2.6}	1	1	NA	NA	NA
67	PEAKS042923	MYB3	AT1G22640	Helix-turn-helix domains{3}	Tryptophan cluster factors{3.5}	2.71e-211	3.23e-08	MA1036.1	JASPAR	MYB111
68	PEAKS042922	MYB3	AT1G22640	Helix-turn-helix domains{3}	Tryptophan cluster factors{3.5}	1.74e-173	6.01e-09	MA2028.1	JASPAR	MYB49
69	PEAKS042915	MYB44	AT5G67300	Helix-turn-helix domains{3}	Tryptophan cluster factors{3.5}	1.57e-138	0.0274	M00878	CIS-BP	KAN3
70	PEAKS042914	MYB44	AT5G67300	Helix-turn-helix domains{3}	Tryptophan cluster factors{3.5}	6.03e-118	0.162	M01267	CIS-BP	MYB124
71	PEAKS058394	MYC2	AT1G32640	Basic domains{1}	Basic helix-loop-helix factors (bHLH){1.2}	1.42e-301	1.02e-07	MA0964.2	JASPAR	BIM1
72	PEAKS042932	NAC032	AT1G77450	β-Hairpin exposed by an α/β-scaffold{7}	GCM domain factors{7.2}	1.94e-117	0.00246	M00976	CIS-BP	NAC055
73	PEAKS042933	NAC032	AT1G77450	β-Hairpin exposed by an α/β-scaffold{7}	GCM domain factors{7.2}	1.61e-131	0.00139	M00970	CIS-BP	NAC002
74	PEAKS058156	PHE1	AT1G65330	α-Helices exposed by β-structures{5}	MADS box factors{5.1}	1	8.48e-07	M08425	CIS-BP	CAL
75	PEAKS058157	PHE1	AT1G65330	α-Helices exposed by β-structures{5}	MADS box factors{5.1}	1	8.87e-05	M08424	CIS-BP	ANR1
76	PEAKS058160	PIE1	AT3G12810	Helix-turn-helix domains{3}	Tryptophan cluster factors{3.5}	1	0.304	M02301	CIS-BP	MYB98
77	PEAKS042805	PIF1	AT2G20180	Basic domains{1}	Basic helix-loop-helix factors (bHLH){1.2}	0	1.34e-08	M08046	CIS-BP	BHLH66
78	PEAKS042804	PIF1	AT2G20180	Basic domains{1}	Basic helix-loop-helix factors (bHLH){1.2}	0	4.13e-08	M08404	CIS-BP	PIF1
79	PEAKS042806	PIF1	AT2G20180	Basic domains{1}	Basic helix-loop-helix factors (bHLH){1.2}	0	3e-08	M08404	CIS-BP	PIF1
80	PEAKS042809	PIF4	AT2G43010	Basic domains{1}	Basic helix-loop-helix factors (bHLH){1.2}	3.1e-219	1.19e-07	M09452	CIS-BP	BHLH66
81	PEAKS042873	PIF4	AT2G43010	Basic domains{1}	Basic helix-loop-helix factors (bHLH){1.2}	0	4.05e-09	M08404	CIS-BP	PIF1
82	PEAKS042779	PIF4	AT2G43010	Basic domains{1}	Basic helix-loop-helix factors (bHLH){1.2}	2.87e-298	1.12e-07	M09452	CIS-BP	BHLH66
83	PEAKS042874	PIF5	AT3G59060	Basic domains{1}	Basic helix-loop-helix factors (bHLH){1.2}	0	1.97e-08	M08404	CIS-BP	PIF1
84	PEAKS042778	PIF5	AT3G59060	Basic domains{1}	Basic helix-loop-helix factors (bHLH){1.2}	0	2.3e-09	M08045	CIS-BP	PIF3
85	PEAKS042991	REF6	AT3G48430	Zinc-coordinating DNA-binding domains{2}	C2H2 zinc finger factors{2.3}	7.74e-23	2e-10	M08081	CIS-BP	REF6
86	PEAKS047354	REF6	AT3G48430	Zinc-coordinating DNA-binding domains{2}	C2H2 zinc finger factors{2.3}	6e-20	9.42e-11	M08081	CIS-BP	REF6
87	PEAKS047357	REF6	AT3G48430	Zinc-coordinating DNA-binding domains{2}	C2H2 zinc finger factors{2.3}	3.32e-16	0.067	M01061	CIS-BP	IDD2
88	PEAKS042992	REF6	AT3G48430	Zinc-coordinating DNA-binding domains{2}	C2H2 zinc finger factors{2.3}	2.62e-23	3.95e-11	M08081	CIS-BP	REF6
89	PEAKS047355	REF6	AT3G48430	Zinc-coordinating DNA-binding domains{2}	C2H2 zinc finger factors{2.3}	1.91e-20	2.89e-10	M08081	CIS-BP	REF6
90	PEAKS042988	REF6	AT3G48430	Zinc-coordinating DNA-binding domains{2}	C2H2 zinc finger factors{2.3}	6.25e-20	3.45e-10	M08081	CIS-BP	REF6
91	PEAKS042863	REF6	AT3G48430	Zinc-coordinating DNA-binding domains{2}	C2H2 zinc finger factors{2.3}	3.11e-18	1.2e-10	M08081	CIS-BP	REF6
92	PEAKS042771	REV	AT5G60690	Helix-turn-helix domains{3}	Homeo domain factors{3.1}	4.95e-88	0.0842	M02044	CIS-BP	HAT3.1
93	PEAKS042845	RGA	AT2G01570	Yet undefined DNA-binding domains{0}	GRAS{0.*}	1	0.988	M02031	CIS-BP	RGL2
94	PEAKS042963	RGA	AT2G01570	Yet undefined DNA-binding domains{0}	GRAS{0.*}	3.56e-18	0.802	M02031	CIS-BP	RGL2
95	PEAKS042820	SEP3	AT1G24260	α-Helices exposed by β-structures{5}	MADS box factors{5.1}	6.42e-110	3.48e-16	M08148	CIS-BP	AGL18
96	PEAKS042816	SEP3	AT1G24260	α-Helices exposed by β-structures{5}	MADS box factors{5.1}	2.8e-145	1.53e-13	M08146	CIS-BP	AP3
97	PEAKS042815	SEP3	AT1G24260	α-Helices exposed by β-structures{5}	MADS box factors{5.1}	7.98e-143	4.44e-10	M08143	CIS-BP	SEP3
98	PEAKS042884	SOC1	AT2G45660	α-Helices exposed by β-structures{5}	MADS box factors{5.1}	2.15e-216	1.47e-12	M08147	CIS-BP	AGL14
99	PEAKS042841	SPCH	AT5G53210	Basic domains{1}	Basic helix-loop-helix factors (bHLH){1.2}	1.5e-133	3.38e-09	M08404	CIS-BP	PIF1
100	PEAKS055376	TCP4	AT3G15030	β-Hairpin exposed by an α/β-scaffold{7}	Ribbon-Helix-Helix factors{7.*}	0	3.84e-06	M02519	CIS-BP	TCP10
101	PEAKS055375	TCP4	AT3G15030	β-Hairpin exposed by an α/β-scaffold{7}	Ribbon-Helix-Helix factors{7.*}	6.27e-54	0.0011	M01086	CIS-BP	TCP9
102	PEAKS042877	TRB1	AT1G49950	Helix-turn-helix domains{3}	Tryptophan cluster factors{3.5}	0	2.89e-08	MA2032.1	JASPAR	TRB1
103	PEAKS042876	TRB1	AT1G49950	Helix-turn-helix domains{3}	Tryptophan cluster factors{3.5}	4.46e-253	9.22e-05	M01070	CIS-BP	AT1G17520
104	PEAKS042950	WRKY18	AT4G31800	β-Hairpin exposed by an α/β-scaffold{7}	GCM domain factors{7.2}	1.08e-219	1.38e-09	MA1087.2	JASPAR	WRKY45
105	PEAKS042956	WRKY18	AT4G31800	β-Hairpin exposed by an α/β-scaffold{7}	GCM domain factors{7.2}	5.03e-169	1.96e-09	MA1079.2	JASPAR	WRKY21
106	PEAKS042949	WRKY18	AT4G31800	β-Hairpin exposed by an α/β-scaffold{7}	GCM domain factors{7.2}	6.58e-154	8.34e-06	M01325	CIS-BP	WRKY56
107	PEAKS042955	WRKY18	AT4G31800	β-Hairpin exposed by an α/β-scaffold{7}	GCM domain factors{7.2}	8.35e-114	2.02e-08	MA1087.2	JASPAR	WRKY45
108	PEAKS042869	WRKY33	AT2G38470	β-Hairpin exposed by an α/β-scaffold{7}	GCM domain factors{7.2}	4.73e-121	5.11e-05	MA1089.1	JASPAR	WRKY57
109	PEAKS042954	WRKY33	AT2G38470	β-Hairpin exposed by an α/β-scaffold{7}	GCM domain factors{7.2}	7.04e-212	7.45e-09	M00731	CIS-BP	WRKY14
110	PEAKS042948	WRKY33	AT2G38470	β-Hairpin exposed by an α/β-scaffold{7}	GCM domain factors{7.2}	2.88e-252	4.14e-11	MA1087.2	JASPAR	WRKY45
111	PEAKS042947	WRKY33	AT2G38470	β-Hairpin exposed by an α/β-scaffold{7}	GCM domain factors{7.2}	2.64e-110	2.43e-07	M02547	CIS-BP	WRKY10
112	PEAKS042953	WRKY33	AT2G38470	β-Hairpin exposed by an α/β-scaffold{7}	GCM domain factors{7.2}	1.03e-23	2.43e-06	MA1078.1	JASPAR	WRKY2
113	PEAKS042868	WRKY33	AT2G38470	β-Hairpin exposed by an α/β-scaffold{7}	GCM domain factors{7.2}	0.0012	0.179	MA1081.2	JASPAR	WRKY25
114	PEAKS042957	WRKY40	AT1G80840	β-Hairpin exposed by an α/β-scaffold{7}	GCM domain factors{7.2}	2.58e-16	1.39e-05	MA1087.2	JASPAR	WRKY45
115	PEAKS042951	WRKY40	AT1G80840	β-Hairpin exposed by an α/β-scaffold{7}	GCM domain factors{7.2}	2.21e-15	0.00038	MA1094.2	JASPAR	WRKY8
116	PEAKS042952	WRKY40	AT1G80840	β-Hairpin exposed by an α/β-scaffold{7}	GCM domain factors{7.2}	5.13e-247	9.44e-09	MA1079.2	JASPAR	WRKY21
117	PEAKS042958	WRKY40	AT1G80840	β-Hairpin exposed by an α/β-scaffold{7}	GCM domain factors{7.2}	8.11e-168	4.37e-08	MA1087.2	JASPAR	WRKY45
118	PEAKS058162	WUS	AT2G17950	Helix-turn-helix domains{3}	Homeo domain factors{3.1}	3.06e-07	0.00207	M04952	CIS-BP	BLH10
119	PEAKS058163	WUS	AT2G17950	Helix-turn-helix domains{3}	Homeo domain factors{3.1}	0.00274	0.164	M02044	CIS-BP	HAT3.1
120	PEAKS042908	ZAT6	AT5G04340	Zinc-coordinating DNA-binding domains{2}	C2H2 zinc finger factors{2.3}	4.68e-21	5.9e-06	MA2052.1	JASPAR	ZAT6
121	PEAKS042909	ZAT6	AT5G04340	Zinc-coordinating DNA-binding domains{2}	C2H2 zinc finger factors{2.3}	1.07e-17	3.75e-06	MA2052.1	JASPAR	ZAT6

## Sheet: Table_S3
Table S3. The benchmark collection of 512 DAP-seq datasets of A. thaliana. For each dataset, we provide a tag from the Plant Cistrome (O’Malley et al., 2016), the target TF name, Locus name from TAIR, and the names of its superclass and class (Plant-TFClass, Castro-Mondragon et al., 2022; Blanc-Mathieu et al., 2023). Columns 'Excluded' and 'Final' mark dataset excluded due to specific reasons and…
#	Plant Cistrome				Plant-TFClass
	TAG	Family	TF	TAIR Locus	Superclass	Class	Excluded	Final
	ABI3VP1_tnt.AT5G60130_col_a	ABI3VP1	AT5G60130	AT5G60130	β-Barrel DNA-binding domains{9}	B3{9.*}		TRUE
	ABI3VP1_tnt.FUS3_col_a	ABI3VP1	FUS3	AT3G26790	β-Barrel DNA-binding domains{9}	B3{9.*}		TRUE
	ABI3VP1_tnt.NGA4_col_a	ABI3VP1	NGA4	AT4G01500	β-Barrel DNA-binding domains{9}	B3{9.*}		TRUE
	ABI3VP1_tnt.VRN1_col_a	ABI3VP1	VRN1	AT3G18990	β-Barrel DNA-binding domains{9}	B3{9.*}	MCOT filer	FALSE
	AP2EREBP_tnt.ABR1_colamp_a	AP2EREBP	ABR1	AT5G64750	β-Hairpin exposed by an α/β-scaffold{7}	AP2/EREBP{7.*}		TRUE
	AP2EREBP_tnt.AIL7_colamp_a	AP2EREBP	AIL7	AT5G65510	β-Hairpin exposed by an α/β-scaffold{7}	AP2/EREBP{7.*}		TRUE
	AP2EREBP_tnt.AT1G12630_col_a	AP2EREBP	AT1G12630	AT1G12630	β-Hairpin exposed by an α/β-scaffold{7}	AP2/EREBP{7.*}		TRUE
	AP2EREBP_tnt.AT1G12630_colamp_a	AP2EREBP	AT1G12630	AT1G12630	β-Hairpin exposed by an α/β-scaffold{7}	AP2/EREBP{7.*}		TRUE
	AP2EREBP_tnt.At1g19210_colamp_a	AP2EREBP	AT1G19210	AT1G19210	β-Hairpin exposed by an α/β-scaffold{7}	AP2/EREBP{7.*}		TRUE
	AP2EREBP_tnt.At1g19210_col_a	AP2EREBP	AT1G19210	AT1G19210	β-Hairpin exposed by an α/β-scaffold{7}	AP2/EREBP{7.*}		TRUE
	AP2EREBP_tnt.At1g22810_colamp_a	AP2EREBP	AT1G22810	AT1G22810	β-Hairpin exposed by an α/β-scaffold{7}	AP2/EREBP{7.*}		TRUE
	AP2EREBP_tnt.At1g22810_col_a	AP2EREBP	AT1G22810	AT1G22810	β-Hairpin exposed by an α/β-scaffold{7}	AP2/EREBP{7.*}		TRUE
	AP2EREBP_tnt.AT1G28160_colamp_a	AP2EREBP	AT1G28160	AT1G28160	β-Hairpin exposed by an α/β-scaffold{7}	AP2/EREBP{7.*}		TRUE
	AP2EREBP_tnt.At1g36060_colamp_a	AP2EREBP	AT1G36060	AT1G36060	β-Hairpin exposed by an α/β-scaffold{7}	AP2/EREBP{7.*}		TRUE
	AP2EREBP_tnt.AT1G71450_colamp_a	AP2EREBP	AT1G71450	AT1G71450	β-Hairpin exposed by an α/β-scaffold{7}	AP2/EREBP{7.*}		TRUE
	AP2EREBP_tnt.AT1G71450_col_a	AP2EREBP	AT1G71450	AT1G71450	β-Hairpin exposed by an α/β-scaffold{7}	AP2/EREBP{7.*}		TRUE
	AP2EREBP_tnt.AT1G77200_colamp_a	AP2EREBP	AT1G77200	AT1G77200	β-Hairpin exposed by an α/β-scaffold{7}	AP2/EREBP{7.*}		TRUE
	AP2EREBP_tnt.AT1G77200_col_a	AP2EREBP	AT1G77200	AT1G77200	β-Hairpin exposed by an α/β-scaffold{7}	AP2/EREBP{7.*}		TRUE
	AP2EREBP_tnt.At2g33710_colamp_a	AP2EREBP	AT2G33710	AT2G33710	β-Hairpin exposed by an α/β-scaffold{7}	AP2/EREBP{7.*}		TRUE
	AP2EREBP_tnt.At2g33710_col_b	AP2EREBP	AT2G33710	AT2G33710	β-Hairpin exposed by an α/β-scaffold{7}	AP2/EREBP{7.*}		TRUE
	AP2EREBP_tnt.At2g33710_col_a	AP2EREBP	AT2G33710	AT2G33710	β-Hairpin exposed by an α/β-scaffold{7}	AP2/EREBP{7.*}		TRUE
	AP2EREBP_tnt.At2g44940_colamp_a	AP2EREBP	AT2G44940	AT2G44940	β-Hairpin exposed by an α/β-scaffold{7}	AP2/EREBP{7.*}		TRUE
	AP2EREBP_tnt.AT3G16280_colamp_a	AP2EREBP	AT3G16280	AT3G16280	β-Hairpin exposed by an α/β-scaffold{7}	AP2/EREBP{7.*}		TRUE
	AP2EREBP_tnt.AT3G60490_colamp_a	AP2EREBP	AT3G60490	AT3G60490	β-Hairpin exposed by an α/β-scaffold{7}	AP2/EREBP{7.*}		TRUE
	AP2EREBP_tnt.At4g16750_col_a	AP2EREBP	AT4G16750	AT4G16750	β-Hairpin exposed by an α/β-scaffold{7}	AP2/EREBP{7.*}		TRUE
	AP2EREBP_tnt.At4g31060_colamp_a	AP2EREBP	AT4G31060	AT4G31060	β-Hairpin exposed by an α/β-scaffold{7}	AP2/EREBP{7.*}		TRUE
	AP2EREBP_tnt.At4g31060_col_a	AP2EREBP	AT4G31060	AT4G31060	β-Hairpin exposed by an α/β-scaffold{7}	AP2/EREBP{7.*}		TRUE
	AP2EREBP_tnt.At4g32800_col_b	AP2EREBP	AT4G32800	AT4G32800	β-Hairpin exposed by an α/β-scaffold{7}	AP2/EREBP{7.*}		TRUE
	AP2EREBP_tnt.At4g32800_colamp_a	AP2EREBP	AT4G32800	AT4G32800	β-Hairpin exposed by an α/β-scaffold{7}	AP2/EREBP{7.*}		TRUE
	AP2EREBP_tnt.At4g32800_col200_a	AP2EREBP	AT4G32800	AT4G32800	β-Hairpin exposed by an α/β-scaffold{7}	AP2/EREBP{7.*}		TRUE
	AP2EREBP_tnt.CBF1_colamp_a	AP2EREBP	CBF1	AT4G25490	β-Hairpin exposed by an α/β-scaffold{7}	AP2/EREBP{7.*}		TRUE
	AP2EREBP_tnt.CBF1_col_a	AP2EREBP	CBF1	AT4G25490	β-Hairpin exposed by an α/β-scaffold{7}	AP2/EREBP{7.*}		TRUE
	AP2EREBP_tnt.CBF2_colamp_a	AP2EREBP	CBF2	AT4G25470	β-Hairpin exposed by an α/β-scaffold{7}	AP2/EREBP{7.*}		TRUE
	AP2EREBP_tnt.CBF2_col_a	AP2EREBP	CBF2	AT4G25470	β-Hairpin exposed by an α/β-scaffold{7}	AP2/EREBP{7.*}		TRUE
	AP2EREBP_tnt.CBF3_col_a	AP2EREBP	CBF3	AT4G25480	β-Hairpin exposed by an α/β-scaffold{7}	AP2/EREBP{7.*}		TRUE
	AP2EREBP_tnt.CBF3_colamp_a	AP2EREBP	CBF3	AT4G25480	β-Hairpin exposed by an α/β-scaffold{7}	AP2/EREBP{7.*}		TRUE
	AP2EREBP_tnt.CBF4_colamp_a	AP2EREBP	CBF4	AT5G51990	β-Hairpin exposed by an α/β-scaffold{7}	AP2/EREBP{7.*}		TRUE
	AP2EREBP_tnt.CBF4_col_a	AP2EREBP	CBF4	AT5G51990	β-Hairpin exposed by an α/β-scaffold{7}	AP2/EREBP{7.*}		TRUE
	AP2EREBP_tnt.CEJ1_col_a	AP2EREBP	CEJ1	AT3G50260	β-Hairpin exposed by an α/β-scaffold{7}	AP2/EREBP{7.*}		TRUE
	AP2EREBP_tnt.CEJ1_colamp_a	AP2EREBP	CEJ1	AT3G50260	β-Hairpin exposed by an α/β-scaffold{7}	AP2/EREBP{7.*}		TRUE
	AP2EREBP_tnt.CRF10_col100_a	AP2EREBP	CRF10	AT1G68550	β-Hairpin exposed by an α/β-scaffold{7}	AP2/EREBP{7.*}		TRUE
	AP2EREBP_tnt.CRF4_colamp_a	AP2EREBP	CRF4	AT4G27950	β-Hairpin exposed by an α/β-scaffold{7}	AP2/EREBP{7.*}		TRUE
	AP2EREBP_tnt.DDF1_col_a	AP2EREBP	DDF1	AT1G12610	β-Hairpin exposed by an α/β-scaffold{7}	AP2/EREBP{7.*}		TRUE
	AP2EREBP_tnt.DEAR2_colamp_a	AP2EREBP	DEAR2	AT5G67190	β-Hairpin exposed by an α/β-scaffold{7}	AP2/EREBP{7.*}		TRUE
	AP2EREBP_tnt.DEAR2_col_a	AP2EREBP	DEAR2	AT5G67190	β-Hairpin exposed by an α/β-scaffold{7}	AP2/EREBP{7.*}		TRUE
	AP2EREBP_tnt.DEAR3_col_a	AP2EREBP	DEAR3	AT2G23340	β-Hairpin exposed by an α/β-scaffold{7}	AP2/EREBP{7.*}		TRUE
	AP2EREBP_tnt.DEAR3_colamp_a	AP2EREBP	DEAR3	AT2G23340	β-Hairpin exposed by an α/β-scaffold{7}	AP2/EREBP{7.*}		TRUE
	AP2EREBP_tnt.DREB19_colamp_a	AP2EREBP	DREB19	AT2G38340	β-Hairpin exposed by an α/β-scaffold{7}	AP2/EREBP{7.*}		TRUE
	AP2EREBP_tnt.ERF105_colamp_a	AP2EREBP	ERF105	AT5G51190	β-Hairpin exposed by an α/β-scaffold{7}	AP2/EREBP{7.*}		TRUE
	AP2EREBP_tnt.ERF11_col_b	AP2EREBP	ERF11	AT1G28370	β-Hairpin exposed by an α/β-scaffold{7}	AP2/EREBP{7.*}		TRUE
	AP2EREBP_tnt.ERF11_colamp_a	AP2EREBP	ERF11	AT1G28370	β-Hairpin exposed by an α/β-scaffold{7}	AP2/EREBP{7.*}		TRUE
	AP2EREBP_tnt.ERF115_colamp_a	AP2EREBP	ERF115	AT5G07310	β-Hairpin exposed by an α/β-scaffold{7}	AP2/EREBP{7.*}		TRUE
	AP2EREBP_tnt.ERF115_col_a	AP2EREBP	ERF115	AT5G07310	β-Hairpin exposed by an α/β-scaffold{7}	AP2/EREBP{7.*}		TRUE
	AP2EREBP_tnt.ERF13_colamp_a	AP2EREBP	ERF13	AT2G44840	β-Hairpin exposed by an α/β-scaffold{7}	AP2/EREBP{7.*}		TRUE
	AP2EREBP_tnt.ERF15_col_b	AP2EREBP	ERF15	AT2G31230	β-Hairpin exposed by an α/β-scaffold{7}	AP2/EREBP{7.*}		TRUE
	AP2EREBP_tnt.ERF15_col100_a	AP2EREBP	ERF15	AT2G31230	β-Hairpin exposed by an α/β-scaffold{7}	AP2/EREBP{7.*}		TRUE
	AP2EREBP_tnt.ERF15_colamp_a	AP2EREBP	ERF15	AT2G31230	β-Hairpin exposed by an α/β-scaffold{7}	AP2/EREBP{7.*}		TRUE
	AP2EREBP_tnt.ERF3_colamp_a	AP2EREBP	ERF3	AT1G50640	β-Hairpin exposed by an α/β-scaffold{7}	AP2/EREBP{7.*}		TRUE
	AP2EREBP_tnt.ERF3_col_a	AP2EREBP	ERF3	AT1G50640	β-Hairpin exposed by an α/β-scaffold{7}	AP2/EREBP{7.*}		TRUE
	AP2EREBP_tnt.ERF38_col_a	AP2EREBP	ERF38	AT2G35700	β-Hairpin exposed by an α/β-scaffold{7}	AP2/EREBP{7.*}		TRUE
	AP2EREBP_tnt.ERF4_col_a	AP2EREBP	ERF4	AT3G15210	β-Hairpin exposed by an α/β-scaffold{7}	AP2/EREBP{7.*}		TRUE
	AP2EREBP_tnt.ERF4_colamp_a	AP2EREBP	ERF4	AT3G15210	β-Hairpin exposed by an α/β-scaffold{7}	AP2/EREBP{7.*}		TRUE
	AP2EREBP_tnt.ERF7_colamp_a	AP2EREBP	ERF7	AT3G20310	β-Hairpin exposed by an α/β-scaffold{7}	AP2/EREBP{7.*}		TRUE
	AP2EREBP_tnt.ERF7_col_a	AP2EREBP	ERF7	AT3G20310	β-Hairpin exposed by an α/β-scaffold{7}	AP2/EREBP{7.*}		TRUE
	AP2EREBP_tnt.ERF8_col_a	AP2EREBP	ERF8	AT1G53170	β-Hairpin exposed by an α/β-scaffold{7}	AP2/EREBP{7.*}		TRUE
	AP2EREBP_tnt.ERF8_colamp_a	AP2EREBP	ERF8	AT1G53170	β-Hairpin exposed by an α/β-scaffold{7}	AP2/EREBP{7.*}		TRUE
	AP2EREBP_tnt.ESE3_col_a	AP2EREBP	ESE3	AT5G25190	β-Hairpin exposed by an α/β-scaffold{7}	AP2/EREBP{7.*}		TRUE
	AP2EREBP_tnt.ESE3_colamp_a	AP2EREBP	ESE3	AT5G25190	β-Hairpin exposed by an α/β-scaffold{7}	AP2/EREBP{7.*}		TRUE
	AP2EREBP_tnt.PUCHI_colamp_a	AP2EREBP	PUCHI	AT5G18560	β-Hairpin exposed by an α/β-scaffold{7}	AP2/EREBP{7.*}		TRUE
	AP2EREBP_tnt.RAP21_col_a	AP2EREBP	RAP21	AT1G46768	β-Hairpin exposed by an α/β-scaffold{7}	AP2/EREBP{7.*}		TRUE
	AP2EREBP_tnt.Rap210_col_a	AP2EREBP	Rap210	AT5G52020	β-Hairpin exposed by an α/β-scaffold{7}	AP2/EREBP{7.*}		TRUE
	AP2EREBP_tnt.Rap210_colamp_a	AP2EREBP	Rap210	AT5G52020	β-Hairpin exposed by an α/β-scaffold{7}	AP2/EREBP{7.*}		TRUE
	AP2EREBP_tnt.RAP211_colamp_a	AP2EREBP	RAP211	AT5G19790	β-Hairpin exposed by an α/β-scaffold{7}	AP2/EREBP{7.*}		TRUE
	AP2EREBP_tnt.RAP211_col_a	AP2EREBP	RAP211	AT5G19790	β-Hairpin exposed by an α/β-scaffold{7}	AP2/EREBP{7.*}		TRUE
	AP2EREBP_tnt.RAP212_col_a	AP2EREBP	RAP212	AT1G53910	β-Hairpin exposed by an α/β-scaffold{7}	AP2/EREBP{7.*}		TRUE
	AP2EREBP_tnt.RAP26_colamp_a	AP2EREBP	RAP26	AT1G43160	β-Hairpin exposed by an α/β-scaffold{7}	AP2/EREBP{7.*}		TRUE
	AP2EREBP_tnt.RAP26_col_a	AP2EREBP	RAP26	AT1G43160	β-Hairpin exposed by an α/β-scaffold{7}	AP2/EREBP{7.*}		TRUE
	AP2EREBP_tnt.RRTF1_col_a	AP2EREBP	RRTF1	AT4G34410	β-Hairpin exposed by an α/β-scaffold{7}	AP2/EREBP{7.*}		TRUE
	AP2EREBP_tnt.RRTF1_colamp_a	AP2EREBP	RRTF1	AT4G34410	β-Hairpin exposed by an α/β-scaffold{7}	AP2/EREBP{7.*}		TRUE
	AP2EREBP_tnt.TINY_col_a	AP2EREBP	TINY	AT5G25810	β-Hairpin exposed by an α/β-scaffold{7}	AP2/EREBP{7.*}		TRUE
	ARF_ecoli.MP_col_v31	ARF	MP	AT1G19850	beta-Barrel DNA-binding domains{9}	B3{9.*}		TRUE
	ARID_tnt.AT1G04880_colamp_a	ARID	AT1G04880	AT1G04880	Helix-turn-helix domains{3}	ARID{3.*}		TRUE
	ARID_tnt.AT1G20910_col_a	ARID	AT1G20910	AT1G20910	Helix-turn-helix domains{3}	ARID{3.*}	MCOT filer	FALSE
	BBRBPC_tnt.BPC1_colamp_a	BBRBPC	BPC1	AT2G01930	Yet undefined DNA-binding domains{0}	BBR/BPC{0.*}	MCOT filer	FALSE
	BES1_tnt.BAM8_colamp_a	BES1	BAM8	AT5G45300	Basic domains{1}	Basic helix-loop-helix factors (bHLH){1.2}		TRUE
	BES1_tnt.BAM8_col_a	BES1	BAM8	AT5G45300	Basic domains{1}	Basic helix-loop-helix factors (bHLH){1.2}		TRUE
	bHLH_tnt.bHLH10_colamp_a	bHLH	bHLH10	AT2G31220	Basic domains{1}	Basic helix-loop-helix factors (bHLH){1.2}		TRUE
	bHLH_tnt.bHLH122_col100_a	bHLH	bHLH122	AT1G51140	Basic domains{1}	Basic helix-loop-helix factors (bHLH){1.2}		TRUE
	bHLH_tnt.bHLH28_col_a	bHLH	bHLH28	AT5G46830	Basic domains{1}	Basic helix-loop-helix factors (bHLH){1.2}		TRUE
	bHLH_tnt.BIM2_colamp_v3b	bHLH	BIM2	AT1G69010	Basic domains{1}	Basic helix-loop-helix factors (bHLH){1.2}		TRUE
	bHLH_tnt.BIM2_colamp_v3a	bHLH	BIM2	AT1G69010	Basic domains{1}	Basic helix-loop-helix factors (bHLH){1.2}		TRUE
	bHLH_tnt.BIM2_col_v3b	bHLH	BIM2	AT1G69010	Basic domains{1}	Basic helix-loop-helix factors (bHLH){1.2}		TRUE
	bZIP_tnt.ABI5_col_v3h	bZIP	ABI5	AT2G36270	Basic domains{1}	Basic leucine zipper factors (bZIP){1.1}		TRUE
	bZIP_tnt.ABI5_colamp_v3b	bZIP	ABI5	AT2G36270	Basic domains{1}	Basic leucine zipper factors (bZIP){1.1}		TRUE
	bZIP_tnt.AREB3_colamp_a	bZIP	AREB3	AT3G56850	Basic domains{1}	Basic leucine zipper factors (bZIP){1.1}		TRUE
	bZIP_tnt.AREB3_col_v31	bZIP	AREB3	AT3G56850	Basic domains{1}	Basic leucine zipper factors (bZIP){1.1}		TRUE
	bZIP_tnt.bZIP16_colamp_a	bZIP	bZIP16	AT2G35530	Basic domains{1}	Basic leucine zipper factors (bZIP){1.1}		TRUE
	bZIP_tnt.bZIP18_colamp_a	bZIP	bZIP18	AT2G40620	Basic domains{1}	Basic leucine zipper factors (bZIP){1.1}		TRUE
	bZIP_tnt.bZIP18_col_v31	bZIP	bZIP18	AT2G40620	Basic domains{1}	Basic leucine zipper factors (bZIP){1.1}		TRUE
	bZIP_tnt.bZIP28_col_a	bZIP	bZIP28	AT3G10800	Basic domains{1}	Basic leucine zipper factors (bZIP){1.1}		TRUE
	bZIP_tnt.bZIP3_col_a	bZIP	bZIP3	AT5G15830	Basic domains{1}	Basic leucine zipper factors (bZIP){1.1}		TRUE
	bZIP_tnt.bZIP48_colamp_a	bZIP	bZIP48	AT2G04038	Basic domains{1}	Basic leucine zipper factors (bZIP){1.1}		TRUE
	bZIP_tnt.bZIP50_col_v31	bZIP	bZIP50	AT1G77920	Basic domains{1}	Basic leucine zipper factors (bZIP){1.1}		TRUE
	bZIP_tnt.bZIP50_colamp_v31	bZIP	bZIP50	AT1G77920	Basic domains{1}	Basic leucine zipper factors (bZIP){1.1}		TRUE
	bZIP_tnt.bZIP52_colamp_a	bZIP	bZIP52	AT1G06850	Basic domains{1}	Basic leucine zipper factors (bZIP){1.1}		TRUE
	bZIP_tnt.bZIP52_col_v31	bZIP	bZIP52	AT1G06850	Basic domains{1}	Basic leucine zipper factors (bZIP){1.1}		TRUE
	bZIP_tnt.bZIP53_col_v3b	bZIP	bZIP53	AT3G62420	Basic domains{1}	Basic leucine zipper factors (bZIP){1.1}		TRUE
	bZIP_tnt.bZIP53_col_v3a	bZIP	bZIP53	AT3G62420	Basic domains{1}	Basic leucine zipper factors (bZIP){1.1}		TRUE
	bZIP_tnt.bZIP53_colamp_a	bZIP	bZIP53	AT3G62420	Basic domains{1}	Basic leucine zipper factors (bZIP){1.1}		TRUE
	bZIP_tnt.bZIP68_col_a	bZIP	bZIP68	AT1G32150	Basic domains{1}	Basic leucine zipper factors (bZIP){1.1}		TRUE
	bZIP_tnt.GBF3_col_v3b	bZIP	GBF3	AT2G46270	Basic domains{1}	Basic leucine zipper factors (bZIP){1.1}		TRUE
	bZIP_tnt.GBF3_colamp_v3e	bZIP	GBF3	AT2G46270	Basic domains{1}	Basic leucine zipper factors (bZIP){1.1}		TRUE
	bZIP_tnt.GBF3_colamp_v3d	bZIP	GBF3	AT2G46270	Basic domains{1}	Basic leucine zipper factors (bZIP){1.1}		TRUE
	bZIP_tnt.GBF3_col_v3a	bZIP	GBF3	AT2G46270	Basic domains{1}	Basic leucine zipper factors (bZIP){1.1}		TRUE
	bZIP_tnt.GBF5_colamp_a	bZIP	GBF5	AT2G18160	Basic domains{1}	Basic leucine zipper factors (bZIP){1.1}		TRUE
	bZIP_tnt.GBF6_col_v3b	bZIP	GBF6	AT4G34590	Basic domains{1}	Basic leucine zipper factors (bZIP){1.1}		TRUE
	bZIP_tnt.GBF6_colamp_a	bZIP	GBF6	AT4G34590	Basic domains{1}	Basic leucine zipper factors (bZIP){1.1}		TRUE
	bZIP_tnt.GBF6_col_v3a	bZIP	GBF6	AT4G34590	Basic domains{1}	Basic leucine zipper factors (bZIP){1.1}		TRUE
	bZIP_tnt.HY5_colamp_v3a	bZIP	HY5	AT5G11260	Basic domains{1}	Basic leucine zipper factors (bZIP){1.1}		TRUE
	bZIP_tnt.TGA1_col_v3a	bZIP	TGA1	AT5G65210	Basic domains{1}	Basic leucine zipper factors (bZIP){1.1}		TRUE
	bZIP_tnt.TGA1_col_v3b	bZIP	TGA1	AT5G65210	Basic domains{1}	Basic leucine zipper factors (bZIP){1.1}		TRUE
	bZIP_tnt.TGA1_colamp_a	bZIP	TGA1	AT5G65210	Basic domains{1}	Basic leucine zipper factors (bZIP){1.1}		TRUE
	bZIP_tnt.TGA10_col_a	bZIP	TGA10	AT5G06839	Basic domains{1}	Basic leucine zipper factors (bZIP){1.1}		TRUE
	bZIP_tnt.TGA10_colamp_a	bZIP	TGA10	AT5G06839	Basic domains{1}	Basic leucine zipper factors (bZIP){1.1}		TRUE
	bZIP_tnt.TGA2_col_v3b	bZIP	TGA2	AT5G06950	Basic domains{1}	Basic leucine zipper factors (bZIP){1.1}		TRUE
	bZIP_tnt.TGA2_col_v3a	bZIP	TGA2	AT5G06950	Basic domains{1}	Basic leucine zipper factors (bZIP){1.1}		TRUE
	bZIP_tnt.TGA2_colamp_v31	bZIP	TGA2	AT5G06950	Basic domains{1}	Basic leucine zipper factors (bZIP){1.1}		TRUE
	bZIP_tnt.TGA3_col_v3a	bZIP	TGA3	AT1G22070	Basic domains{1}	Basic leucine zipper factors (bZIP){1.1}		TRUE
	bZIP_tnt.TGA3_col_v3b	bZIP	TGA3	AT1G22070	Basic domains{1}	Basic leucine zipper factors (bZIP){1.1}		TRUE
	bZIP_tnt.TGA4_colamp_a	bZIP	TGA4	AT5G10030	Basic domains{1}	Basic leucine zipper factors (bZIP){1.1}		TRUE
	bZIP_tnt.TGA4_col_a	bZIP	TGA4	AT5G10030	Basic domains{1}	Basic leucine zipper factors (bZIP){1.1}		TRUE
	bZIP_tnt.TGA5_col_v3a	bZIP	TGA5	AT5G06960	Basic domains{1}	Basic leucine zipper factors (bZIP){1.1}		TRUE
	bZIP_tnt.TGA6_col_a	bZIP	TGA6	AT3G12250	Basic domains{1}	Basic leucine zipper factors (bZIP){1.1}		TRUE
	bZIP_tnt.TGA6_colamp_a	bZIP	TGA6	AT3G12250	Basic domains{1}	Basic leucine zipper factors (bZIP){1.1}		TRUE
	bZIP_tnt.TGA9_colamp_a	bZIP	TGA9	AT1G08320	Basic domains{1}	Basic leucine zipper factors (bZIP){1.1}		TRUE
	bZIP_tnt.TGA9_col_a	bZIP	TGA9	AT1G08320	Basic domains{1}	Basic leucine zipper factors (bZIP){1.1}		TRUE
	BZR_tnt.At1g78700_col_a	BZR	AT1G78700	AT1G78700	Basic domains{1}	Basic helix-loop-helix factors (bHLH){1.2}		TRUE
	BZR_tnt.At4g36780_col_a	BZR	AT4G36780	AT4G36780	Basic domains{1}	Basic helix-loop-helix factors (bHLH){1.2}		TRUE
	C2C2dof_tnt.AT1G47655_col_a	C2C2dof	AT1G47655	AT1G47655	Zinc-coordinating DNA-binding domains{2}	Other C4 zinc finger-type factors{2.2}		TRUE
	C2C2dof_tnt.AT1G47655_colamp_a	C2C2dof	AT1G47655	AT1G47655	Zinc-coordinating DNA-binding domains{2}	Other C4 zinc finger-type factors{2.2}		TRUE
	C2C2dof_tnt.At1g64620_colamp_a	C2C2dof	AT1G64620	AT1G64620	Zinc-coordinating DNA-binding domains{2}	Other C4 zinc finger-type factors{2.2}		TRUE
	C2C2dof_tnt.AT1G69570_col_a	C2C2dof	AT1G69570	AT1G69570	Zinc-coordinating DNA-binding domains{2}	Other C4 zinc finger-type factors{2.2}		TRUE
	C2C2dof_tnt.AT1G69570_colamp_a	C2C2dof	AT1G69570	AT1G69570	Zinc-coordinating DNA-binding domains{2}	Other C4 zinc finger-type factors{2.2}		TRUE
	C2C2dof_tnt.AT2G28810_col_a	C2C2dof	AT2G28810	AT2G28810	Zinc-coordinating DNA-binding domains{2}	Other C4 zinc finger-type factors{2.2}		TRUE
	C2C2dof_tnt.AT2G28810_colamp_a	C2C2dof	AT2G28810	AT2G28810	Zinc-coordinating DNA-binding domains{2}	Other C4 zinc finger-type factors{2.2}		TRUE
	C2C2dof_tnt.At3g45610_colamp_a	C2C2dof	AT3G45610	AT3G45610	Zinc-coordinating DNA-binding domains{2}	Other C4 zinc finger-type factors{2.2}		TRUE
	C2C2dof_tnt.AT3G52440_col_a	C2C2dof	AT3G52440	AT3G52440	Zinc-coordinating DNA-binding domains{2}	Other C4 zinc finger-type factors{2.2}		TRUE
	C2C2dof_tnt.AT3G52440_colamp_a	C2C2dof	AT3G52440	AT3G52440	Zinc-coordinating DNA-binding domains{2}	Other C4 zinc finger-type factors{2.2}		TRUE
	C2C2dof_tnt.At4g38000_col_a	C2C2dof	AT4G38000	AT4G38000	Zinc-coordinating DNA-binding domains{2}	Other C4 zinc finger-type factors{2.2}		TRUE
	C2C2dof_tnt.At4g38000_colamp_a	C2C2dof	AT4G38000	AT4G38000	Zinc-coordinating DNA-binding domains{2}	Other C4 zinc finger-type factors{2.2}		TRUE
	C2C2dof_tnt.AT5G02460_colamp_a	C2C2dof	AT5G02460	AT5G02460	Zinc-coordinating DNA-binding domains{2}	Other C4 zinc finger-type factors{2.2}		TRUE
	C2C2dof_tnt.At5g62940_col_a	C2C2dof	AT5G62940	AT5G62940	Zinc-coordinating DNA-binding domains{2}	Other C4 zinc finger-type factors{2.2}		TRUE
	C2C2dof_tnt.AT5G66940_colamp_a	C2C2dof	AT5G66940	AT5G66940	Zinc-coordinating DNA-binding domains{2}	Other C4 zinc finger-type factors{2.2}		TRUE
	C2C2dof_tnt.AT5G66940_col_a	C2C2dof	AT5G66940	AT5G66940	Zinc-coordinating DNA-binding domains{2}	Other C4 zinc finger-type factors{2.2}		TRUE
	C2C2dof_tnt.CDF3_col_a	C2C2dof	CDF3	AT3G47500	Zinc-coordinating DNA-binding domains{2}	Other C4 zinc finger-type factors{2.2}		TRUE
	C2C2dof_tnt.CDF3_colamp_a	C2C2dof	CDF3	AT3G47500	Zinc-coordinating DNA-binding domains{2}	Other C4 zinc finger-type factors{2.2}		TRUE
	C2C2dof_tnt.COG1_colamp_a	C2C2dof	COG1	AT1G29160	Zinc-coordinating DNA-binding domains{2}	Other C4 zinc finger-type factors{2.2}		TRUE
	C2C2dof_tnt.DAG2_colamp_a	C2C2dof	DAG2	AT2G46590	Zinc-coordinating DNA-binding domains{2}	Other C4 zinc finger-type factors{2.2}		TRUE
	C2C2dof_tnt.dof24_col_a	C2C2dof	dof24	AT2G37590	Zinc-coordinating DNA-binding domains{2}	Other C4 zinc finger-type factors{2.2}		TRUE
	C2C2dof_tnt.dof24_colamp_a	C2C2dof	dof24	AT2G37590	Zinc-coordinating DNA-binding domains{2}	Other C4 zinc finger-type factors{2.2}		TRUE
	C2C2dof_tnt.dof43_colamp_a	C2C2dof	dof43	AT4G21040	Zinc-coordinating DNA-binding domains{2}	Other C4 zinc finger-type factors{2.2}		TRUE
	C2C2dof_tnt.dof43_col_a	C2C2dof	dof43	AT4G21040	Zinc-coordinating DNA-binding domains{2}	Other C4 zinc finger-type factors{2.2}		TRUE
	C2C2dof_tnt.dof45_col_a	C2C2dof	dof45	AT4G21080	Zinc-coordinating DNA-binding domains{2}	Other C4 zinc finger-type factors{2.2}		TRUE
	C2C2dof_tnt.OBP1_col_a	C2C2dof	OBP1	AT3G50410	Zinc-coordinating DNA-binding domains{2}	Other C4 zinc finger-type factors{2.2}		TRUE
	C2C2dof_tnt.OBP3_colamp_a	C2C2dof	OBP3	AT3G55370	Zinc-coordinating DNA-binding domains{2}	Other C4 zinc finger-type factors{2.2}		TRUE
	C2C2dof_tnt.OBP3_col_a	C2C2dof	OBP3	AT3G55370	Zinc-coordinating DNA-binding domains{2}	Other C4 zinc finger-type factors{2.2}		TRUE
	C2C2dof_tnt.OBP4_colamp_a	C2C2dof	OBP4	AT5G60850	Zinc-coordinating DNA-binding domains{2}	Other C4 zinc finger-type factors{2.2}		TRUE
	C2C2gata_tnt.GATA1_colamp_a	C2C2gata	GATA1	AT3G24050	Zinc-coordinating DNA-binding domains{2}	Other C4 zinc finger-type factors{2.2}		TRUE
	C2C2gata_tnt.GATA20_colamp_a	C2C2gata	GATA20	AT2G18380	Zinc-coordinating DNA-binding domains{2}	Other C4 zinc finger-type factors{2.2}		TRUE
	C2C2gata_tnt.GATA4_col_a	C2C2gata	GATA4	AT3G60530	Zinc-coordinating DNA-binding domains{2}	Other C4 zinc finger-type factors{2.2}		TRUE
	C2H2_tnt.At1g14580_colamp_a	C2H2	AT1G14580	AT1G14580	Zinc-coordinating DNA-binding domains{2}	C2H2 zinc finger factors{2.3}		TRUE
	C2H2_tnt.AT4G26030_col_a	C2H2	AT4G26030	AT4G26030	Zinc-coordinating DNA-binding domains{2}	C2H2 zinc finger factors{2.3}		TRUE
	C2H2_tnt.At5g04390_col200_a	C2H2	AT5G04390	AT5G04390	Zinc-coordinating DNA-binding domains{2}	C2H2 zinc finger factors{2.3}		TRUE
	C2H2_tnt.At5g66730_colamp_a	C2H2	AT5G66730	AT5G66730	Zinc-coordinating DNA-binding domains{2}	C2H2 zinc finger factors{2.3}		TRUE
	C2H2_tnt.AtIDD11_colamp_a	C2H2	ATIDD11	AT3G13810	Zinc-coordinating DNA-binding domains{2}	C2H2 zinc finger factors{2.3}		TRUE
	C2H2_tnt.IDD2_colamp_a	C2H2	IDD2	AT3G50700	Zinc-coordinating DNA-binding domains{2}	C2H2 zinc finger factors{2.3}		TRUE
	C2H2_tnt.IDD4_col_a	C2H2	IDD4	AT2G02080	Zinc-coordinating DNA-binding domains{2}	C2H2 zinc finger factors{2.3}		TRUE
	C2H2_tnt.IDD5_colamp_a	C2H2	IDD5	AT2G02070	Zinc-coordinating DNA-binding domains{2}	C2H2 zinc finger factors{2.3}		TRUE
	C2H2_tnt.MGP_colamp_a	C2H2	MGP	AT1G03840	Zinc-coordinating DNA-binding domains{2}	C2H2 zinc finger factors{2.3}		TRUE
	C2H2_tnt.SGR5_colamp_a	C2H2	SGR5	AT2G01940	Zinc-coordinating DNA-binding domains{2}	C2H2 zinc finger factors{2.3}		TRUE
	C2H2_tnt.STZ_col_b	C2H2	STZ	AT1G27730	Zinc-coordinating DNA-binding domains{2}	C2H2 zinc finger factors{2.3}		TRUE
	C2H2_tnt.STZ_col100_a	C2H2	STZ	AT1G27730	Zinc-coordinating DNA-binding domains{2}	C2H2 zinc finger factors{2.3}		TRUE
	C2H2_tnt.STZ_colamp_a	C2H2	STZ	AT1G27730	Zinc-coordinating DNA-binding domains{2}	C2H2 zinc finger factors{2.3}		TRUE
	C2H2_tnt.WIP5_colamp_a	C2H2	WIP5	AT1G51220	Zinc-coordinating DNA-binding domains{2}	C2H2 zinc finger factors{2.3}		TRUE
	C3H_tnt.AT3G12130_colamp_a	C3H	AT3G12130	AT3G12130	Zinc-coordinating DNA-binding domains{2}	C3H zinc finger factors{2.8}	C3H family	FALSE
	C3H_tnt.AT5G63260_col_a	C3H	AT5G63260	AT5G63260	Zinc-coordinating DNA-binding domains{2}	C3H zinc finger factors{2.8}	C3H family	FALSE
	C3H_tnt.AT5G63260_colamp_a	C3H	AT5G63260	AT5G63260	Zinc-coordinating DNA-binding domains{2}	C3H zinc finger factors{2.8}	C3H family	FALSE
	C3H_tnt.CDM1_colamp_a	C3H	CDM1	AT1G68200	Zinc-coordinating DNA-binding domains{2}	C3H zinc finger factors{2.8}	C3H family	FALSE
	CAMTA_tnt.CAMTA1_col_a	CAMTA	CAMTA1	AT5G09410	β-Hairpin exposed by an α/β-scaffold{7}	GCM domain factors{7.2}		TRUE
	CPP_tnt.AT2G20110_col_a	CPP	AT2G20110	AT2G20110	Yet undefined DNA-binding domains{0}	CPP{0.*}	Yet undefined DNA-binding domains {0}	FALSE
	CPP_tnt.AT2G20110_colamp_a	CPP	AT2G20110	AT2G20110	Yet undefined DNA-binding domains{0}	CPP{0.*}	Yet undefined DNA-binding domains {0}	FALSE
	CPP_tnt.SOL1_col_b	CPP	SOL1	AT3G22760	Yet undefined DNA-binding domains{0}	CPP{0.*}	Yet undefined DNA-binding domains {0}	FALSE
	CPP_tnt.SOL1_colamp_a	CPP	SOL1	AT3G22760	Yet undefined DNA-binding domains{0}	CPP{0.*}	Yet undefined DNA-binding domains {0}	FALSE
	CPP_tnt.SOL1_col_a	CPP	SOL1	AT3G22760	Yet undefined DNA-binding domains{0}	CPP{0.*}	Yet undefined DNA-binding domains {0}	FALSE
	CPP_tnt.TCX2_col_a	CPP	TCX2	AT4G14770	Yet undefined DNA-binding domains{0}	CPP{0.*}	Yet undefined DNA-binding domains {0}	FALSE
	CPP_tnt.TCX2_colamp_a	CPP	TCX2	AT4G14770	Yet undefined DNA-binding domains{0}	CPP{0.*}	Yet undefined DNA-binding domains {0}	FALSE
	E2FDP_tnt.E2FA_colamp_a	E2FDP	E2FA	AT2G36010	Helix-turn-helix domains{3}	Fork head / winged helix factors{3.3}		TRUE
	EIL_tnt.EIN3_col_a	EIL	EIN3	AT3G20770	Other all-alpha-helical DNA-binding domains{4}	EIL{4.*}		TRUE
	G2like_tnt.At1g25550_col100_a	G2like	AT1G25550	AT1G25550	Helix-turn-helix domains{3}	Tryptophan cluster factors{3.5}		TRUE
	G2like_tnt.At1g25550_colamp_a	G2like	AT1G25550	AT1G25550	Helix-turn-helix domains{3}	Tryptophan cluster factors{3.5}		TRUE
	G2like_tnt.At1g25550_col_b	G2like	AT1G25550	AT1G25550	Helix-turn-helix domains{3}	Tryptophan cluster factors{3.5}		TRUE
	G2like_tnt.AT1G49560_colamp_a	G2like	AT1G49560	AT1G49560	Helix-turn-helix domains{3}	Tryptophan cluster factors{3.5}		TRUE
	G2like_tnt.AT1G49560_col_a	G2like	AT1G49560	AT1G49560	Helix-turn-helix domains{3}	Tryptophan cluster factors{3.5}		TRUE
	G2like_tnt.At1g68670_col_b	G2like	AT1G68670	AT1G68670	Helix-turn-helix domains{3}	Tryptophan cluster factors{3.5}		TRUE
	G2like_tnt.At1g68670_colamp_a	G2like	AT1G68670	AT1G68670	Helix-turn-helix domains{3}	Tryptophan cluster factors{3.5}		TRUE
	G2like_tnt.At1g68670_col100_a	G2like	AT1G68670	AT1G68670	Helix-turn-helix domains{3}	Tryptophan cluster factors{3.5}		TRUE
	G2like_tnt.At2g01060_colamp_a	G2like	AT2G01060	AT2G01060	Helix-turn-helix domains{3}	Tryptophan cluster factors{3.5}		TRUE
	G2like_tnt.At2g01060_col_b	G2like	AT2G01060	AT2G01060	Helix-turn-helix domains{3}	Tryptophan cluster factors{3.5}		TRUE
	G2like_tnt.At2g01060_col_a	G2like	AT2G01060	AT2G01060	Helix-turn-helix domains{3}	Tryptophan cluster factors{3.5}		TRUE
	G2like_tnt.At2g03500_col_a	G2like	AT2G03500	AT2G03500	Helix-turn-helix domains{3}	Tryptophan cluster factors{3.5}		TRUE
	G2like_tnt.AT2G20400_colamp_a	G2like	AT2G20400	AT2G20400	Helix-turn-helix domains{3}	Tryptophan cluster factors{3.5}		TRUE
	G2like_tnt.AT2G40260_col_a	G2like	AT2G40260	AT2G40260	Helix-turn-helix domains{3}	Tryptophan cluster factors{3.5}		TRUE
	G2like_tnt.AT2G40260_colamp_a	G2like	AT2G40260	AT2G40260	Helix-turn-helix domains{3}	Tryptophan cluster factors{3.5}		TRUE
	G2like_tnt.At3g04030_col_a	G2like	AT3G04030	AT3G04030	Helix-turn-helix domains{3}	Tryptophan cluster factors{3.5}		TRUE
	G2like_tnt.At3g04030_colamp_a	G2like	AT3G04030	AT3G04030	Helix-turn-helix domains{3}	Tryptophan cluster factors{3.5}		TRUE
	G2like_tnt.At3g12730_colamp_a	G2like	AT3G12730	AT3G12730	Helix-turn-helix domains{3}	Tryptophan cluster factors{3.5}		TRUE
	G2like_tnt.At3g24120_colamp_a	G2like	AT3G24120	AT3G24120	Helix-turn-helix domains{3}	Tryptophan cluster factors{3.5}		TRUE
	G2like_tnt.At3g24120_col_a	G2like	AT3G24120	AT3G24120	Helix-turn-helix domains{3}	Tryptophan cluster factors{3.5}		TRUE
	G2like_tnt.AT4G37180_colamp_a	G2like	AT4G37180	AT4G37180	Helix-turn-helix domains{3}	Tryptophan cluster factors{3.5}		TRUE
	G2like_tnt.AT4G37180_col_a	G2like	AT4G37180	AT4G37180	Helix-turn-helix domains{3}	Tryptophan cluster factors{3.5}		TRUE
	G2like_tnt.At5g29000_col_a	G2like	AT5G29000	AT5G29000	Helix-turn-helix domains{3}	Tryptophan cluster factors{3.5}		TRUE
	G2like_tnt.AT5G45580_colamp_a	G2like	AT5G45580	AT5G45580	Helix-turn-helix domains{3}	Tryptophan cluster factors{3.5}		TRUE
	G2like_tnt.AT5G45580_col_a	G2like	AT5G45580	AT5G45580	Helix-turn-helix domains{3}	Tryptophan cluster factors{3.5}		TRUE
	GeBP_tnt.AT4G00250_col_a	GeBP	AT4G00250	AT4G00250	Helix-turn-helix domains{3}	Tryptophan cluster factors{3.5}		TRUE
	GRF_tnt.AtGRF6_col_a	GRF	ATGRF6	AT2G06200	Zinc-coordinating DNA-binding domains{2}	C3H zinc finger factors{2.8}	GRF family	FALSE
	GRF_tnt.GRF9_colamp_a	GRF	GRF9	AT2G45480	Zinc-coordinating DNA-binding domains{2}	C3H zinc finger factors{2.8}	GRF family	FALSE
	HB_tnt.ANL2_col_a	HB	ANL2	AT4G00730	Helix-turn-helix domains{3}	Homeo domain factors{3.1}		TRUE
	HB_tnt.ATHB15_col_a	HB	ATHB15	AT1G52150	Helix-turn-helix domains{3}	Homeo domain factors{3.1}		TRUE
	HB_tnt.ATHB21_col_a	HB	ATHB21	AT2G18550	Helix-turn-helix domains{3}	Homeo domain factors{3.1}		TRUE
	HB_tnt.ATHB21_colamp_a	HB	ATHB21	AT2G18550	Helix-turn-helix domains{3}	Homeo domain factors{3.1}		TRUE
	HB_tnt.ATHB40_colamp_a	HB	ATHB40	AT4G36740	Helix-turn-helix domains{3}	Homeo domain factors{3.1}		TRUE
	HB_tnt.ATHB40_col_a	HB	ATHB40	AT4G36740	Helix-turn-helix domains{3}	Homeo domain factors{3.1}		TRUE
	HB_tnt.ATHB5_col_a	HB	ATHB5	AT5G65310	Helix-turn-helix domains{3}	Homeo domain factors{3.1}		TRUE
	HB_tnt.ATHB5_colamp_a	HB	ATHB5	AT5G65310	Helix-turn-helix domains{3}	Homeo domain factors{3.1}		TRUE
	HB_tnt.ATHB53_colamp_a	HB	ATHB53	AT5G66700	Helix-turn-helix domains{3}	Homeo domain factors{3.1}		TRUE
	HB_tnt.ATHB53_col_a	HB	ATHB53	AT5G66700	Helix-turn-helix domains{3}	Homeo domain factors{3.1}		TRUE
	HB_tnt.LMI1_colamp_a	HB	LMI1	AT5G03790	Helix-turn-helix domains{3}	Homeo domain factors{3.1}		TRUE
	HB_tnt.LMI1_col_a	HB	LMI1	AT5G03790	Helix-turn-helix domains{3}	Homeo domain factors{3.1}		TRUE
	HB_tnt.PHV_col_a	HB	PHV	AT1G30490	Helix-turn-helix domains{3}	Homeo domain factors{3.1}		TRUE
	Homeobox_tnt.ATHB13_col_a	Homeobox	ATHB13	AT1G69780	Helix-turn-helix domains{3}	Homeo domain factors{3.1}		TRUE
	Homeobox_tnt.ATHB18_col_a	Homeobox	ATHB18	AT1G70920	Helix-turn-helix domains{3}	Homeo domain factors{3.1}		TRUE
	Homeobox_tnt.ATHB18_colamp_a	Homeobox	ATHB18	AT1G70920	Helix-turn-helix domains{3}	Homeo domain factors{3.1}		TRUE
	Homeobox_tnt.ATHB20_colamp_a	Homeobox	ATHB20	AT3G01220	Helix-turn-helix domains{3}	Homeo domain factors{3.1}		TRUE
	Homeobox_ecoli.HAT2_col_v31	Homeobox	HAT2	AT5G47370	Helix-turn-helix domains{3}	Homeo domain factors{3.1}		TRUE
	Homeobox_tnt.HAT2_colamp_a	Homeobox	HAT2	AT5G47370	Helix-turn-helix domains{3}	Homeo domain factors{3.1}		TRUE
	Homeobox_tnt.HDG1_col100_a	Homeobox	HDG1	AT3G61150	Helix-turn-helix domains{3}	Homeo domain factors{3.1}		TRUE
	Homeobox_tnt.WUS1_colamp_a	Homeobox	WUS1	AT2G17950	Helix-turn-helix domains{3}	Homeo domain factors{3.1}		TRUE
	HSF_tnt.HSF3_colamp_a	HSF	HSF3	AT5G16820	Helix-turn-helix domains{3}	Heat shock factors{3.4}		TRUE
	HSF_tnt.HSF3_col_a	HSF	HSF3	AT5G16820	Helix-turn-helix domains{3}	Heat shock factors{3.4}		TRUE
	HSF_tnt.HSF6_col_a	HSF	HSF6	AT5G62020	Helix-turn-helix domains{3}	Heat shock factors{3.4}		TRUE
	HSF_tnt.HSF7_colamp_a	HSF	HSF7	AT4G11660	Helix-turn-helix domains{3}	Heat shock factors{3.4}		TRUE
	HSF_tnt.HSFA6B_col100_a	HSF	HSFA6B	AT3G22830	Helix-turn-helix domains{3}	Heat shock factors{3.4}		TRUE
	HSF_tnt.HSFA6B_col_b	HSF	HSFA6B	AT3G22830	Helix-turn-helix domains{3}	Heat shock factors{3.4}		TRUE
	HSF_tnt.HSFA6B_colamp_a	HSF	HSFA6B	AT3G22830	Helix-turn-helix domains{3}	Heat shock factors{3.4}		TRUE
	HSF_tnt.HSFC1_col_a	HSF	HSFC1	AT3G24520	Helix-turn-helix domains{3}	Heat shock factors{3.4}		TRUE
	HSF_tnt.HSFC1_colamp_a	HSF	HSFC1	AT3G24520	Helix-turn-helix domains{3}	Heat shock factors{3.4}		TRUE
	LOBAS2_tnt.ASL18_colamp_a	LOBAS2	ASL18	AT2G42430	Zinc-coordinating DNA-binding domains{2}	Other C4 zinc finger-type factors{2.2}		TRUE
	LOBAS2_tnt.LBD13_colamp_a	LOBAS2	LBD13	AT2G30340	Zinc-coordinating DNA-binding domains{2}	Other C4 zinc finger-type factors{2.2}		TRUE
	LOBAS2_tnt.LBD18_colamp_a	LOBAS2	LBD18	AT2G45420	Zinc-coordinating DNA-binding domains{2}	Other C4 zinc finger-type factors{2.2}		TRUE
	LOBAS2_tnt.LBD18_col_a	LOBAS2	LBD18	AT2G45420	Zinc-coordinating DNA-binding domains{2}	Other C4 zinc finger-type factors{2.2}		TRUE
	LOBAS2_tnt.LBD19_colamp_a	LOBAS2	LBD19	AT2G45410	Zinc-coordinating DNA-binding domains{2}	Other C4 zinc finger-type factors{2.2}		TRUE
	LOBAS2_tnt.LBD19_col_a	LOBAS2	LBD19	AT2G45410	Zinc-coordinating DNA-binding domains{2}	Other C4 zinc finger-type factors{2.2}		TRUE
	LOBAS2_tnt.LBD2_colamp_a	LOBAS2	LBD2	AT1G06280	Zinc-coordinating DNA-binding domains{2}	Other C4 zinc finger-type factors{2.2}		TRUE
	LOBAS2_tnt.LBD23_colamp_a	LOBAS2	LBD23	AT3G26620	Zinc-coordinating DNA-binding domains{2}	Other C4 zinc finger-type factors{2.2}		TRUE
	LOBAS2_tnt.LOB_col_a	LOBAS2	LOB	AT5G63090	Zinc-coordinating DNA-binding domains{2}	Other C4 zinc finger-type factors{2.2}		TRUE
	MADS_tnt.AGL15_col_a	MADS	AGL15	AT5G13790	α-Helices exposed by β-structures{5}	MADS box factors{5.1}		TRUE
	MADS_tnt.AGL63_col_a	MADS	AGL63	AT1G31140	α-Helices exposed by β-structures{5}	MADS box factors{5.1}		TRUE
	MADS_tnt.SVP_col_v3b	MADS	SVP	AT2G22540	α-Helices exposed by β-structures{5}	MADS box factors{5.1}		TRUE
	mTERF_tnt.AT5G23930_col_a	mTERF	AT5G23930	AT5G23930	Undefined	Undefined	Undefined	FALSE
	MYB_tnt.ATY13_colamp_a	MYB	ATY13	AT1G74650	Helix-turn-helix domains{3}	Tryptophan cluster factors{3.5}		TRUE
	MYB_tnt.MS188_colamp_a	MYB	MS188	AT5G56110	Helix-turn-helix domains{3}	Tryptophan cluster factors{3.5}		TRUE
	MYB_tnt.MYB101_colamp_a	MYB	MYB101	AT2G32460	Helix-turn-helix domains{3}	Tryptophan cluster factors{3.5}		TRUE
	MYB_tnt.MYB107_col_a	MYB	MYB107	AT3G02940	Helix-turn-helix domains{3}	Tryptophan cluster factors{3.5}		TRUE
	MYB_tnt.MYB107_colamp_a	MYB	MYB107	AT3G02940	Helix-turn-helix domains{3}	Tryptophan cluster factors{3.5}		TRUE
	MYB_tnt.MYB116_colamp_a	MYB	MYB116	AT1G25340	Helix-turn-helix domains{3}	Tryptophan cluster factors{3.5}		TRUE
	MYB_tnt.MYB118_colamp_a	MYB	MYB118	AT3G27785	Helix-turn-helix domains{3}	Tryptophan cluster factors{3.5}		TRUE
	MYB_tnt.MYB119_col_a	MYB	MYB119	AT5G58850	Helix-turn-helix domains{3}	Tryptophan cluster factors{3.5}		TRUE
	MYB_tnt.MYB119_colamp_a	MYB	MYB119	AT5G58850	Helix-turn-helix domains{3}	Tryptophan cluster factors{3.5}		TRUE
	MYB_tnt.MYB13_col_a	MYB	MYB13	AT1G06180	Helix-turn-helix domains{3}	Tryptophan cluster factors{3.5}		TRUE
	MYB_tnt.MYB13_colamp_a	MYB	MYB13	AT1G06180	Helix-turn-helix domains{3}	Tryptophan cluster factors{3.5}		TRUE
	MYB_tnt.MYB27_colamp_a	MYB	MYB27	AT3G53200	Helix-turn-helix domains{3}	Tryptophan cluster factors{3.5}		TRUE
	MYB_tnt.MYB30_colamp_a	MYB	MYB30	AT3G28910	Helix-turn-helix domains{3}	Tryptophan cluster factors{3.5}		TRUE
	MYB_tnt.MYB33_col_a	MYB	MYB33	AT5G06100	Helix-turn-helix domains{3}	Tryptophan cluster factors{3.5}		TRUE
	MYB_tnt.MYB3R1_colamp_a	MYB	MYB3R1	AT4G32730	Helix-turn-helix domains{3}	Tryptophan cluster factors{3.5}		TRUE
	MYB_tnt.MYB3R1_col_a	MYB	MYB3R1	AT4G32730	Helix-turn-helix domains{3}	Tryptophan cluster factors{3.5}		TRUE
	MYB_tnt.MYB3R4_col_a	MYB	MYB3R4	AT5G11510	Helix-turn-helix domains{3}	Tryptophan cluster factors{3.5}		TRUE
	MYB_tnt.MYB44_col_b	MYB	MYB44	AT5G67300	Helix-turn-helix domains{3}	Tryptophan cluster factors{3.5}		TRUE
	MYB_tnt.MYB44_col100_a	MYB	MYB44	AT5G67300	Helix-turn-helix domains{3}	Tryptophan cluster factors{3.5}		TRUE
	MYB_tnt.MYB49_col_a	MYB	MYB49	AT5G54230	Helix-turn-helix domains{3}	Tryptophan cluster factors{3.5}		TRUE
	MYB_tnt.MYB49_colamp_a	MYB	MYB49	AT5G54230	Helix-turn-helix domains{3}	Tryptophan cluster factors{3.5}		TRUE
	MYB_tnt.MYB55_colamp_a	MYB	MYB55	AT4G01680	Helix-turn-helix domains{3}	Tryptophan cluster factors{3.5}		TRUE
	MYB_tnt.MYB56_colamp_a	MYB	MYB56	AT5G17800	Helix-turn-helix domains{3}	Tryptophan cluster factors{3.5}		TRUE
	MYB_tnt.MYB56_col_a	MYB	MYB56	AT5G17800	Helix-turn-helix domains{3}	Tryptophan cluster factors{3.5}		TRUE
	MYB_tnt.MYB57_col_a	MYB	MYB57	AT3G01530	Helix-turn-helix domains{3}	Tryptophan cluster factors{3.5}		TRUE
	MYB_tnt.MYB57_colamp_a	MYB	MYB57	AT3G01530	Helix-turn-helix domains{3}	Tryptophan cluster factors{3.5}		TRUE
	MYB_tnt.MYB58_col_a	MYB	MYB58	AT1G16490	Helix-turn-helix domains{3}	Tryptophan cluster factors{3.5}		TRUE
	MYB_tnt.MYB58_colamp_a	MYB	MYB58	AT1G16490	Helix-turn-helix domains{3}	Tryptophan cluster factors{3.5}		TRUE
	MYB_tnt.MYB61_colamp_a	MYB	MYB61	AT1G09540	Helix-turn-helix domains{3}	Tryptophan cluster factors{3.5}		TRUE
	MYB_tnt.MYB62_colamp_a	MYB	MYB62	AT1G68320	Helix-turn-helix domains{3}	Tryptophan cluster factors{3.5}		TRUE
	MYB_tnt.MYB65_colamp_a	MYB	MYB65	AT3G11440	Helix-turn-helix domains{3}	Tryptophan cluster factors{3.5}		TRUE
	MYB_tnt.MYB70_col_a	MYB	MYB70	AT2G23290	Helix-turn-helix domains{3}	Tryptophan cluster factors{3.5}		TRUE
	MYB_tnt.MYB73_col_a	MYB	MYB73	AT4G37260	Helix-turn-helix domains{3}	Tryptophan cluster factors{3.5}		TRUE
	MYB_tnt.MYB74_colamp_a	MYB	MYB74	AT4G05100	Helix-turn-helix domains{3}	Tryptophan cluster factors{3.5}		TRUE
	MYB_tnt.MYB77_col_a	MYB	MYB77	AT3G50060	Helix-turn-helix domains{3}	Tryptophan cluster factors{3.5}		TRUE
	MYB_tnt.MYB81_col_a	MYB	MYB81	AT2G26960	Helix-turn-helix domains{3}	Tryptophan cluster factors{3.5}		TRUE
	MYB_tnt.MYB83_colamp_a	MYB	MYB83	AT3G08500	Helix-turn-helix domains{3}	Tryptophan cluster factors{3.5}		TRUE
	MYB_tnt.MYB88_col_a	MYB	MYB88	AT2G02820	Helix-turn-helix domains{3}	Tryptophan cluster factors{3.5}		TRUE
	MYB_tnt.MYB88_colamp_a	MYB	MYB88	AT2G02820	Helix-turn-helix domains{3}	Tryptophan cluster factors{3.5}		TRUE
	MYB_tnt.MYB93_colamp_a	MYB	MYB93	AT1G34670	Helix-turn-helix domains{3}	Tryptophan cluster factors{3.5}		TRUE
	MYB_tnt.MYB93_col_a	MYB	MYB93	AT1G34670	Helix-turn-helix domains{3}	Tryptophan cluster factors{3.5}		TRUE
	MYB_tnt.MYB98_col_a	MYB	MYB98	AT4G18770	Helix-turn-helix domains{3}	Tryptophan cluster factors{3.5}		TRUE
	MYB_tnt.MYB99_colamp_a	MYB	MYB99	AT5G62320	Helix-turn-helix domains{3}	Tryptophan cluster factors{3.5}		TRUE
	MYBrelated_tnt.At1g19000_colamp_a	MYBrelated	AT1G19000	AT1G19000	Helix-turn-helix domains{3}	Tryptophan cluster factors{3.5}		TRUE
	MYBrelated_tnt.At1g19000_col_a	MYBrelated	AT1G19000	AT1G19000	Helix-turn-helix domains{3}	Tryptophan cluster factors{3.5}		TRUE
	MYBrelated_tnt.At1g49010_colamp_a	MYBrelated	AT1G49010	AT1G49010	Helix-turn-helix domains{3}	Tryptophan cluster factors{3.5}		TRUE
	MYBrelated_tnt.At1g49010_col_a	MYBrelated	AT1G49010	AT1G49010	Helix-turn-helix domains{3}	Tryptophan cluster factors{3.5}		TRUE
	MYBrelated_tnt.AT1G72740_col_a	MYBrelated	AT1G72740	AT1G72740	Helix-turn-helix domains{3}	Tryptophan cluster factors{3.5}		TRUE
	MYBrelated_tnt.AT1G72740_colamp_a	MYBrelated	AT1G72740	AT1G72740	Helix-turn-helix domains{3}	Tryptophan cluster factors{3.5}		TRUE
	MYBrelated_tnt.At1g74840_col100_a	MYBrelated	AT1G74840	AT1G74840	Helix-turn-helix domains{3}	Tryptophan cluster factors{3.5}		TRUE
	MYBrelated_tnt.At3g09600_colamp_a	MYBrelated	AT3G09600	AT3G09600	Helix-turn-helix domains{3}	Tryptophan cluster factors{3.5}		TRUE
	MYBrelated_tnt.AT3G10113_col_a	MYBrelated	AT3G10113	AT3G10113	Helix-turn-helix domains{3}	Tryptophan cluster factors{3.5}		TRUE
	MYBrelated_tnt.AT3G10580_colamp_a	MYBrelated	AT3G10580	AT3G10580	Helix-turn-helix domains{3}	Tryptophan cluster factors{3.5}		TRUE
	MYBrelated_tnt.At3g11280_col_a	MYBrelated	AT3G11280	AT3G11280	Helix-turn-helix domains{3}	Tryptophan cluster factors{3.5}		TRUE
	MYBrelated_tnt.At4g01280_colamp_a	MYBrelated	AT4G01280	AT4G01280	Helix-turn-helix domains{3}	Tryptophan cluster factors{3.5}		TRUE
	MYBrelated_tnt.At4g01280_col_a	MYBrelated	AT4G01280	AT4G01280	Helix-turn-helix domains{3}	Tryptophan cluster factors{3.5}		TRUE
	MYBrelated_tnt.At5g08520_colamp_a	MYBrelated	AT5G08520	AT5G08520	Helix-turn-helix domains{3}	Tryptophan cluster factors{3.5}		TRUE
	MYBrelated_tnt.At5g47390_col_b	MYBrelated	AT5G47390	AT5G47390	Helix-turn-helix domains{3}	Tryptophan cluster factors{3.5}		TRUE
	MYBrelated_tnt.At5g52660_col_a	MYBrelated	AT5G52660	AT5G52660	Helix-turn-helix domains{3}	Tryptophan cluster factors{3.5}		TRUE
	MYBrelated_tnt.At5g52660_colamp_a	MYBrelated	AT5G52660	AT5G52660	Helix-turn-helix domains{3}	Tryptophan cluster factors{3.5}		TRUE
	MYBrelated_tnt.AT5G56840_col_a	MYBrelated	AT5G56840	AT5G56840	Helix-turn-helix domains{3}	Tryptophan cluster factors{3.5}		TRUE
	MYBrelated_tnt.AT5G56840_colamp_a	MYBrelated	AT5G56840	AT5G56840	Helix-turn-helix domains{3}	Tryptophan cluster factors{3.5}		TRUE
	MYBrelated_tnt.At5g58900_colamp_a	MYBrelated	AT5G58900	AT5G58900	Helix-turn-helix domains{3}	Tryptophan cluster factors{3.5}		TRUE
	MYBrelated_tnt.AT5G61620_colamp_a	MYBrelated	AT5G61620	AT5G61620	Helix-turn-helix domains{3}	Tryptophan cluster factors{3.5}		TRUE
	MYBrelated_tnt.AT5G61620_col_a	MYBrelated	AT5G61620	AT5G61620	Helix-turn-helix domains{3}	Tryptophan cluster factors{3.5}		TRUE
	MYBrelated_tnt.EPR1_col200_a	MYBrelated	EPR1	AT1G18330	Helix-turn-helix domains{3}	Tryptophan cluster factors{3.5}		TRUE
	MYBrelated_tnt.EPR1_col_b	MYBrelated	EPR1	AT1G18330	Helix-turn-helix domains{3}	Tryptophan cluster factors{3.5}		TRUE
	MYBrelated_tnt.EPR1_colamp_a	MYBrelated	EPR1	AT1G18330	Helix-turn-helix domains{3}	Tryptophan cluster factors{3.5}		TRUE
	MYBrelated_tnt.LCL1_col_a	MYBrelated	LCL1	AT5G02840	Helix-turn-helix domains{3}	Tryptophan cluster factors{3.5}		TRUE
	MYBrelated_tnt.LCL1_colamp_a	MYBrelated	LCL1	AT5G02840	Helix-turn-helix domains{3}	Tryptophan cluster factors{3.5}		TRUE
	MYBrelated_tnt.LCL1_col_b	MYBrelated	LCL1	AT5G02840	Helix-turn-helix domains{3}	Tryptophan cluster factors{3.5}		TRUE
	MYBrelated_tnt.LHY1_colamp_a	MYBrelated	LHY1	AT1G01060	Helix-turn-helix domains{3}	Tryptophan cluster factors{3.5}		TRUE
	MYBrelated_tnt.LHY1_col_a	MYBrelated	LHY1	AT1G01060	Helix-turn-helix domains{3}	Tryptophan cluster factors{3.5}		TRUE
	MYBrelated_tnt.RVE1_colamp_a	MYBrelated	RVE1	AT5G17300	Helix-turn-helix domains{3}	Tryptophan cluster factors{3.5}		TRUE
	MYBrelated_tnt.RVE1_col_a	MYBrelated	RVE1	AT5G17300	Helix-turn-helix domains{3}	Tryptophan cluster factors{3.5}		TRUE
	MYBrelated_tnt.TBP3_col_a	MYBrelated	TBP3	AT5G67580	Helix-turn-helix domains{3}	Tryptophan cluster factors{3.5}		TRUE
	MYBrelated_tnt.TRP2_colamp_a	MYBrelated	TRP2	AT3G46590	Helix-turn-helix domains{3}	Tryptophan cluster factors{3.5}		TRUE
	NAC_tnt.ANAC004_colamp_a	NAC	ANAC004	AT1G02230	β-Hairpin exposed by an α/β-scaffold{7}	GCM domain factors{7.2}		TRUE
	NAC_tnt.ANAC004_col_a	NAC	ANAC004	AT1G02230	β-Hairpin exposed by an α/β-scaffold{7}	GCM domain factors{7.2}		TRUE
	NAC_tnt.ANAC005_col_a	NAC	ANAC005	AT1G02250	β-Hairpin exposed by an α/β-scaffold{7}	GCM domain factors{7.2}		TRUE
	NAC_tnt.ANAC013_col_a	NAC	ANAC013	AT1G32870	β-Hairpin exposed by an α/β-scaffold{7}	GCM domain factors{7.2}		TRUE
	NAC_tnt.ANAC016_colamp_a	NAC	ANAC016	AT1G34180	β-Hairpin exposed by an α/β-scaffold{7}	GCM domain factors{7.2}		TRUE
	NAC_tnt.ANAC016_col_a	NAC	ANAC016	AT1G34180	β-Hairpin exposed by an α/β-scaffold{7}	GCM domain factors{7.2}		TRUE
	NAC_tnt.ANAC017_col_v3a	NAC	ANAC017	AT1G34190	β-Hairpin exposed by an α/β-scaffold{7}	GCM domain factors{7.2}		TRUE
	NAC_tnt.ANAC017_col_v3b	NAC	ANAC017	AT1G34190	β-Hairpin exposed by an α/β-scaffold{7}	GCM domain factors{7.2}		TRUE
	NAC_tnt.ANAC017_colamp_v31	NAC	ANAC017	AT1G34190	β-Hairpin exposed by an α/β-scaffold{7}	GCM domain factors{7.2}		TRUE
	NAC_tnt.ANAC020_col_v31	NAC	ANAC020	AT1G54330	β-Hairpin exposed by an α/β-scaffold{7}	GCM domain factors{7.2}		TRUE
	NAC_tnt.ANAC028_col_a	NAC	ANAC028	AT1G65910	β-Hairpin exposed by an α/β-scaffold{7}	GCM domain factors{7.2}		TRUE
	NAC_tnt.ANAC034_col_v3b	NAC	ANAC034	AT2G02450	β-Hairpin exposed by an α/β-scaffold{7}	GCM domain factors{7.2}		TRUE
	NAC_tnt.ANAC034_col_v3a	NAC	ANAC034	AT2G02450	β-Hairpin exposed by an α/β-scaffold{7}	GCM domain factors{7.2}		TRUE
	NAC_tnt.ANAC038_col_a	NAC	ANAC038	AT2G24430	β-Hairpin exposed by an α/β-scaffold{7}	GCM domain factors{7.2}		TRUE
	NAC_tnt.ANAC042_col_a	NAC	ANAC042	AT2G43000	β-Hairpin exposed by an α/β-scaffold{7}	GCM domain factors{7.2}		TRUE
	NAC_tnt.ANAC045_colamp_a	NAC	ANAC045	AT3G03200	β-Hairpin exposed by an α/β-scaffold{7}	GCM domain factors{7.2}		TRUE
	NAC_tnt.ANAC045_col_a	NAC	ANAC045	AT3G03200	β-Hairpin exposed by an α/β-scaffold{7}	GCM domain factors{7.2}		TRUE
	NAC_tnt.ANAC046_colamp_a	NAC	ANAC046	AT3G04060	β-Hairpin exposed by an α/β-scaffold{7}	GCM domain factors{7.2}		TRUE
	NAC_tnt.ANAC046_col_v3a	NAC	ANAC046	AT3G04060	β-Hairpin exposed by an α/β-scaffold{7}	GCM domain factors{7.2}		TRUE
	NAC_tnt.ANAC046_col_v3b	NAC	ANAC046	AT3G04060	β-Hairpin exposed by an α/β-scaffold{7}	GCM domain factors{7.2}		TRUE
	NAC_tnt.ANAC047_col_v3b	NAC	ANAC047	AT3G04070	β-Hairpin exposed by an α/β-scaffold{7}	GCM domain factors{7.2}		TRUE
	NAC_tnt.ANAC047_col_v3a	NAC	ANAC047	AT3G04070	β-Hairpin exposed by an α/β-scaffold{7}	GCM domain factors{7.2}		TRUE
	NAC_tnt.ANAC050_col_v3a	NAC	ANAC050	AT3G10480	β-Hairpin exposed by an α/β-scaffold{7}	GCM domain factors{7.2}		TRUE
	NAC_tnt.ANAC050_colamp_a	NAC	ANAC050	AT3G10480	β-Hairpin exposed by an α/β-scaffold{7}	GCM domain factors{7.2}		TRUE
	NAC_tnt.ANAC053_col_v3a	NAC	ANAC053	AT3G10500	β-Hairpin exposed by an α/β-scaffold{7}	GCM domain factors{7.2}		TRUE
	NAC_tnt.ANAC053_col_v3b	NAC	ANAC053	AT3G10500	β-Hairpin exposed by an α/β-scaffold{7}	GCM domain factors{7.2}		TRUE
	NAC_tnt.ANAC053_colamp_a	NAC	ANAC053	AT3G10500	β-Hairpin exposed by an α/β-scaffold{7}	GCM domain factors{7.2}		TRUE
	NAC_tnt.ANAC057_col_a	NAC	ANAC057	AT3G17730	β-Hairpin exposed by an α/β-scaffold{7}	GCM domain factors{7.2}		TRUE
	NAC_tnt.ANAC057_colamp_a	NAC	ANAC057	AT3G17730	β-Hairpin exposed by an α/β-scaffold{7}	GCM domain factors{7.2}		TRUE
	NAC_tnt.ANAC058_colamp_a	NAC	ANAC058	AT3G18400	β-Hairpin exposed by an α/β-scaffold{7}	GCM domain factors{7.2}		TRUE
	NAC_tnt.ANAC058_col_a	NAC	ANAC058	AT3G18400	β-Hairpin exposed by an α/β-scaffold{7}	GCM domain factors{7.2}		TRUE
	NAC_tnt.ANAC062_col_v3a	NAC	ANAC062	AT3G49530	β-Hairpin exposed by an α/β-scaffold{7}	GCM domain factors{7.2}		TRUE
	NAC_tnt.ANAC062_col_v3b	NAC	ANAC062	AT3G49530	β-Hairpin exposed by an α/β-scaffold{7}	GCM domain factors{7.2}		TRUE
	NAC_tnt.ANAC062_colamp_a	NAC	ANAC062	AT3G49530	β-Hairpin exposed by an α/β-scaffold{7}	GCM domain factors{7.2}		TRUE
	NAC_tnt.ANAC070_colamp_a	NAC	ANAC070	AT4G10350	β-Hairpin exposed by an α/β-scaffold{7}	GCM domain factors{7.2}		TRUE
	NAC_tnt.ANAC070_col_v3b	NAC	ANAC070	AT4G10350	β-Hairpin exposed by an α/β-scaffold{7}	GCM domain factors{7.2}		TRUE
	NAC_tnt.ANAC070_col_v3a	NAC	ANAC070	AT4G10350	β-Hairpin exposed by an α/β-scaffold{7}	GCM domain factors{7.2}		TRUE
	NAC_tnt.ANAC071_colamp_a	NAC	ANAC071	AT4G17980	β-Hairpin exposed by an α/β-scaffold{7}	GCM domain factors{7.2}		TRUE
	NAC_tnt.ANAC071_col_a	NAC	ANAC071	AT4G17980	β-Hairpin exposed by an α/β-scaffold{7}	GCM domain factors{7.2}		TRUE
	NAC_tnt.ANAC075_col_a	NAC	ANAC075	AT4G29230	β-Hairpin exposed by an α/β-scaffold{7}	GCM domain factors{7.2}		TRUE
	NAC_tnt.ANAC083_col_v3a	NAC	ANAC083	AT5G13180	β-Hairpin exposed by an α/β-scaffold{7}	GCM domain factors{7.2}		TRUE
	NAC_tnt.ANAC083_colamp_a	NAC	ANAC083	AT5G13180	β-Hairpin exposed by an α/β-scaffold{7}	GCM domain factors{7.2}		TRUE
	NAC_tnt.ANAC087_colamp_a	NAC	ANAC087	AT5G18270	β-Hairpin exposed by an α/β-scaffold{7}	GCM domain factors{7.2}		TRUE
	NAC_tnt.ANAC092_col_v3a	NAC	ANAC092	AT5G39610	β-Hairpin exposed by an α/β-scaffold{7}	GCM domain factors{7.2}		TRUE
	NAC_tnt.ANAC092_colamp_a	NAC	ANAC092	AT5G39610	β-Hairpin exposed by an α/β-scaffold{7}	GCM domain factors{7.2}		TRUE
	NAC_tnt.ANAC096_col_v3a	NAC	ANAC096	AT5G46590	β-Hairpin exposed by an α/β-scaffold{7}	GCM domain factors{7.2}		TRUE
	NAC_tnt.ANAC096_col_v3b	NAC	ANAC096	AT5G46590	β-Hairpin exposed by an α/β-scaffold{7}	GCM domain factors{7.2}		TRUE
	NAC_tnt.ANAC096_colamp_a	NAC	ANAC096	AT5G46590	β-Hairpin exposed by an α/β-scaffold{7}	GCM domain factors{7.2}		TRUE
	NAC_tnt.ANAC103_col_a	NAC	ANAC103	AT5G64060	β-Hairpin exposed by an α/β-scaffold{7}	GCM domain factors{7.2}		TRUE
	NAC_tnt.ANAC103_colamp_a	NAC	ANAC103	AT5G64060	β-Hairpin exposed by an α/β-scaffold{7}	GCM domain factors{7.2}		TRUE
	NAC_tnt.CUC2_colamp_a	NAC	CUC2	AT5G53950	β-Hairpin exposed by an α/β-scaffold{7}	GCM domain factors{7.2}		TRUE
	NAC_tnt.CUC3_col_a	NAC	CUC3	AT1G76420	β-Hairpin exposed by an α/β-scaffold{7}	GCM domain factors{7.2}		TRUE
	NAC_tnt.NAC2_colamp_a	NAC	NAC2	AT5G04410	β-Hairpin exposed by an α/β-scaffold{7}	GCM domain factors{7.2}		TRUE
	NAC_tnt.NAC2_col_v3a	NAC	NAC2	AT5G04410	β-Hairpin exposed by an α/β-scaffold{7}	GCM domain factors{7.2}		TRUE
	NAC_tnt.NAM_col_v3a	NAC	NAM	AT1G52880	β-Hairpin exposed by an α/β-scaffold{7}	GCM domain factors{7.2}		TRUE
	NAC_tnt.NAM_colamp_a	NAC	NAM	AT1G52880	β-Hairpin exposed by an α/β-scaffold{7}	GCM domain factors{7.2}		TRUE
	NAC_tnt.NAP_colamp_a	NAC	NAP	AT1G69490	β-Hairpin exposed by an α/β-scaffold{7}	GCM domain factors{7.2}		TRUE
	NAC_tnt.NAP_col_v3a	NAC	NAP	AT1G69490	β-Hairpin exposed by an α/β-scaffold{7}	GCM domain factors{7.2}		TRUE
	NAC_tnt.NST1_col_v31	NAC	NST1	AT2G46770	β-Hairpin exposed by an α/β-scaffold{7}	GCM domain factors{7.2}		TRUE
	NAC_tnt.NST1_colamp_a	NAC	NST1	AT2G46770	β-Hairpin exposed by an α/β-scaffold{7}	GCM domain factors{7.2}		TRUE
	NAC_tnt.NTL8_col_v3a	NAC	NTL8	AT2G27300	β-Hairpin exposed by an α/β-scaffold{7}	GCM domain factors{7.2}		TRUE
	NAC_tnt.NTL8_col_v3b	NAC	NTL8	AT2G27300	β-Hairpin exposed by an α/β-scaffold{7}	GCM domain factors{7.2}		TRUE
	NAC_tnt.NTM1_col_a	NAC	NTM1	AT4G01540	β-Hairpin exposed by an α/β-scaffold{7}	GCM domain factors{7.2}		TRUE
	NAC_tnt.NTM1_colamp_a	NAC	NTM1	AT4G01540	β-Hairpin exposed by an α/β-scaffold{7}	GCM domain factors{7.2}		TRUE
	NAC_tnt.NTM2_col_b	NAC	NTM2	AT4G01550	β-Hairpin exposed by an α/β-scaffold{7}	GCM domain factors{7.2}		TRUE
	NAC_tnt.SMB_colamp_a	NAC	SMB	AT1G79580	β-Hairpin exposed by an α/β-scaffold{7}	GCM domain factors{7.2}		TRUE
	NAC_tnt.SMB_col_a	NAC	SMB	AT1G79580	β-Hairpin exposed by an α/β-scaffold{7}	GCM domain factors{7.2}		TRUE
	NAC_tnt.SND2_col_a	NAC	SND2	AT4G28500	β-Hairpin exposed by an α/β-scaffold{7}	GCM domain factors{7.2}		TRUE
	NAC_tnt.SND2_colamp_a	NAC	SND2	AT4G28500	β-Hairpin exposed by an α/β-scaffold{7}	GCM domain factors{7.2}		TRUE
	NAC_tnt.SND3_colamp_a	NAC	SND3	AT1G28470	β-Hairpin exposed by an α/β-scaffold{7}	GCM domain factors{7.2}		TRUE
	NAC_tnt.SND3_col_b	NAC	SND3	AT1G28470	β-Hairpin exposed by an α/β-scaffold{7}	GCM domain factors{7.2}		TRUE
	NAC_tnt.VND1_col_a	NAC	VND1	AT2G18060	β-Hairpin exposed by an α/β-scaffold{7}	GCM domain factors{7.2}		TRUE
	NAC_tnt.VND2_colamp_a	NAC	VND2	AT4G36160	β-Hairpin exposed by an α/β-scaffold{7}	GCM domain factors{7.2}		TRUE
	NAC_tnt.VND2_col_a	NAC	VND2	AT4G36160	β-Hairpin exposed by an α/β-scaffold{7}	GCM domain factors{7.2}		TRUE
	NAC_tnt.VND3_colamp_a	NAC	VND3	AT5G66300	β-Hairpin exposed by an α/β-scaffold{7}	GCM domain factors{7.2}		TRUE
	NAC_tnt.VND3_col_v3b	NAC	VND3	AT5G66300	β-Hairpin exposed by an α/β-scaffold{7}	GCM domain factors{7.2}		TRUE
	NAC_tnt.VND3_col_v3a	NAC	VND3	AT5G66300	β-Hairpin exposed by an α/β-scaffold{7}	GCM domain factors{7.2}		TRUE
	NAC_tnt.VND4_col_v3b	NAC	VND4	AT1G12260	β-Hairpin exposed by an α/β-scaffold{7}	GCM domain factors{7.2}		TRUE
	NAC_tnt.VND4_colamp_a	NAC	VND4	AT1G12260	β-Hairpin exposed by an α/β-scaffold{7}	GCM domain factors{7.2}		TRUE
	NAC_tnt.VND4_col_v3a	NAC	VND4	AT1G12260	β-Hairpin exposed by an α/β-scaffold{7}	GCM domain factors{7.2}		TRUE
	NAC_tnt.VND6_colamp_a	NAC	VND6	AT5G62380	β-Hairpin exposed by an α/β-scaffold{7}	GCM domain factors{7.2}		TRUE
	NAC_tnt.VND6_col_v31	NAC	VND6	AT5G62380	β-Hairpin exposed by an α/β-scaffold{7}	GCM domain factors{7.2}		TRUE
	ND_tnt.FRS9_col_a	ND	FRS9	AT4G38170	β-Hairpin exposed by an α/β-scaffold{7}	GCM domain factors{7.2}	MCOT filer	FALSE
	ND_tnt.FRS9_colamp_a	ND	FRS9	AT4G38170	β-Hairpin exposed by an α/β-scaffold{7}	GCM domain factors{7.2}	MCOT filer	FALSE
	Orphan_tnt.BBX31_col_a	Orphan	BBX31	AT3G21890	Undefined	Undefined	Undefined	FALSE
	RAV_tnt.RAV1_col_b	RAV	RAV1	AT1G13260	beta-Barrel DNA-binding domains{9}	B3{9.*}		TRUE
	RAV_tnt.RAV1_colamp_a	RAV	RAV1	AT1G13260	beta-Barrel DNA-binding domains{9}	B3{9.*}		TRUE
	RAV_tnt.RAV1_col100_a	RAV	RAV1	AT1G13260	beta-Barrel DNA-binding domains{9}	B3{9.*}		TRUE
	REM_tnt.REM19_colamp_a	REM	REM19	AT1G49480	beta-Barrel DNA-binding domains{9}	B3{9.*}		TRUE
	RWPRK_tnt.RKD2_colamp_a	RWPRK	RKD2	AT1G74480	Yet undefined DNA-binding domains{0}	RWP-RK{0.*}	Yet undefined DNA-binding domains {0}	FALSE
	S1Falike_tnt.AT3G09735_col_a	S1Falike	AT3G09735	AT3G09735	Yet undefined DNA-binding domains{0}	S1Fa-like{0.*}	Yet undefined DNA-binding domains {0}	FALSE
	SBP_tnt.SPL1_col_a	SBP	SPL1	AT2G47070	Zinc-coordinating DNA-binding domains{2}	SBP{2.*}		TRUE
	SBP_tnt.SPL1_colamp_a	SBP	SPL1	AT2G47070	Zinc-coordinating DNA-binding domains{2}	SBP{2.*}		TRUE
	SBP_tnt.SPL14_col_a	SBP	SPL14	AT1G20980	Zinc-coordinating DNA-binding domains{2}	SBP{2.*}		TRUE
	SBP_tnt.SPL15_colamp_a	SBP	SPL15	AT3G57920	Zinc-coordinating DNA-binding domains{2}	SBP{2.*}		TRUE
	SBP_tnt.SPL5_colamp_a	SBP	SPL5	AT3G15270	Zinc-coordinating DNA-binding domains{2}	SBP{2.*}		TRUE
	SBP_tnt.SPL5_col_a	SBP	SPL5	AT3G15270	Zinc-coordinating DNA-binding domains{2}	SBP{2.*}		TRUE
	SBP_tnt.SPL9_colamp_a	SBP	SPL9	AT2G42200	Zinc-coordinating DNA-binding domains{2}	SBP{2.*}		TRUE
	SBP_tnt.SPL9_col_a	SBP	SPL9	AT2G42200	Zinc-coordinating DNA-binding domains{2}	SBP{2.*}		TRUE
	SRS_tnt.SRS7_colamp_a	SRS	SRS7	AT1G19790	Undefined	Undefined	Undefined	FALSE
	TCP_tnt.At1g72010_col200_a	TCP	AT1G72010	AT1G72010	β-Hairpin exposed by an α/β-scaffold{7}	Ribbon-Helix-Helix factors{7.*}		TRUE
	TCP_tnt.At1g72010_col_b	TCP	AT1G72010	AT1G72010	β-Hairpin exposed by an α/β-scaffold{7}	Ribbon-Helix-Helix factors{7.*}		TRUE
	TCP_tnt.At1g72010_colamp_a	TCP	AT1G72010	AT1G72010	β-Hairpin exposed by an α/β-scaffold{7}	Ribbon-Helix-Helix factors{7.*}		TRUE
	TCP_tnt.At5g08330_col_a	TCP	AT5G08330	AT5G08330	β-Hairpin exposed by an α/β-scaffold{7}	Ribbon-Helix-Helix factors{7.*}		TRUE
	TCP_tnt.TCP20_col_a	TCP	TCP20	AT3G27010	β-Hairpin exposed by an α/β-scaffold{7}	Ribbon-Helix-Helix factors{7.*}		TRUE
	TCP_tnt.TCP7_col_a	TCP	TCP7	AT5G23280	β-Hairpin exposed by an α/β-scaffold{7}	Ribbon-Helix-Helix factors{7.*}		TRUE
	Trihelix_tnt.AT2G33550_colamp_a	Trihelix	AT2G33550	AT2G33550	Helix-turn-helix domains	Tryptophan cluster factors{3.5}		TRUE
	Trihelix_tnt.AT3G10030_colamp_a	Trihelix	AT3G10030	AT3G10030	Helix-turn-helix domains	Tryptophan cluster factors{3.5}		TRUE
	Trihelix_tnt.At3g14180_col_b	Trihelix	AT3G14180	AT3G14180	Helix-turn-helix domains	Tryptophan cluster factors{3.5}		TRUE
	Trihelix_tnt.At3g14180_col100_a	Trihelix	AT3G14180	AT3G14180	Helix-turn-helix domains	Tryptophan cluster factors{3.5}		TRUE
	Trihelix_tnt.AT3G25990_colamp_a	Trihelix	AT3G25990	AT3G25990	Helix-turn-helix domains	Tryptophan cluster factors{3.5}		TRUE
	Trihelix_tnt.AT5G05550_col_a	Trihelix	AT5G05550	AT5G05550	Helix-turn-helix domains	Tryptophan cluster factors{3.5}		TRUE
	Trihelix_tnt.AT5G05550_colamp_a	Trihelix	AT5G05550	AT5G05550	Helix-turn-helix domains	Tryptophan cluster factors{3.5}		TRUE
	Trihelix_tnt.AT5G47660_colamp_a	Trihelix	AT5G47660	AT5G47660	Helix-turn-helix domains	Tryptophan cluster factors{3.5}		TRUE
	Trihelix_tnt.GT2_colamp_a	Trihelix	GT2	AT1G76890	Helix-turn-helix domains	Tryptophan cluster factors{3.5}		TRUE
	Trihelix_tnt.GT2_col_a	Trihelix	GT2	AT1G76890	Helix-turn-helix domains	Tryptophan cluster factors{3.5}		TRUE
	Trihelix_tnt.GTL1_col_a	Trihelix	GTL1	AT1G33240	Helix-turn-helix domains	Tryptophan cluster factors{3.5}		TRUE
	Trihelix_tnt.GTL1_colamp_a	Trihelix	GTL1	AT1G33240	Helix-turn-helix domains	Tryptophan cluster factors{3.5}		TRUE
	WRKY_tnt.WRKY14_col_a	WRKY	WRKY14	AT1G30650	β-Hairpin exposed by an α/β-scaffold{7}	GCM domain factors{7.2}		TRUE
	WRKY_tnt.WRKY14_colamp_a	WRKY	WRKY14	AT1G30650	β-Hairpin exposed by an α/β-scaffold{7}	GCM domain factors{7.2}		TRUE
	WRKY_tnt.WRKY15_colamp_a	WRKY	WRKY15	AT2G23320	β-Hairpin exposed by an α/β-scaffold{7}	GCM domain factors{7.2}		TRUE
	WRKY_tnt.WRKY15_col_b	WRKY	WRKY15	AT2G23320	β-Hairpin exposed by an α/β-scaffold{7}	GCM domain factors{7.2}		TRUE
	WRKY_tnt.WRKY18_colamp_a	WRKY	WRKY18	AT4G31800	β-Hairpin exposed by an α/β-scaffold{7}	GCM domain factors{7.2}		TRUE
	WRKY_tnt.WRKY18_col_a	WRKY	WRKY18	AT4G31800	β-Hairpin exposed by an α/β-scaffold{7}	GCM domain factors{7.2}		TRUE
	WRKY_tnt.WRKY22_col100_a	WRKY	WRKY22	AT4G01250	β-Hairpin exposed by an α/β-scaffold{7}	GCM domain factors{7.2}		TRUE
	WRKY_tnt.WRKY22_colamp_a	WRKY	WRKY22	AT4G01250	β-Hairpin exposed by an α/β-scaffold{7}	GCM domain factors{7.2}		TRUE
	WRKY_tnt.WRKY22_col_b	WRKY	WRKY22	AT4G01250	β-Hairpin exposed by an α/β-scaffold{7}	GCM domain factors{7.2}		TRUE
	WRKY_tnt.WRKY24_colamp_a	WRKY	WRKY24	AT5G41570	β-Hairpin exposed by an α/β-scaffold{7}	GCM domain factors{7.2}		TRUE
	WRKY_tnt.WRKY24_col_a	WRKY	WRKY24	AT5G41570	β-Hairpin exposed by an α/β-scaffold{7}	GCM domain factors{7.2}		TRUE
	WRKY_tnt.WRKY25_colamp_a	WRKY	WRKY25	AT2G30250	β-Hairpin exposed by an α/β-scaffold{7}	GCM domain factors{7.2}		TRUE
	WRKY_tnt.WRKY25_col_a	WRKY	WRKY25	AT2G30250	β-Hairpin exposed by an α/β-scaffold{7}	GCM domain factors{7.2}		TRUE
	WRKY_tnt.WRKY27_colamp_a	WRKY	WRKY27	AT5G52830	β-Hairpin exposed by an α/β-scaffold{7}	GCM domain factors{7.2}		TRUE
	WRKY_tnt.WRKY28_col_a	WRKY	WRKY28	AT4G18170	β-Hairpin exposed by an α/β-scaffold{7}	GCM domain factors{7.2}		TRUE
	WRKY_tnt.WRKY29_col_a	WRKY	WRKY29	AT4G23550	β-Hairpin exposed by an α/β-scaffold{7}	GCM domain factors{7.2}		TRUE
	WRKY_tnt.WRKY29_colamp_a	WRKY	WRKY29	AT4G23550	β-Hairpin exposed by an α/β-scaffold{7}	GCM domain factors{7.2}		TRUE
	WRKY_tnt.WRKY3_col_a	WRKY	WRKY3	AT2G03340	β-Hairpin exposed by an α/β-scaffold{7}	GCM domain factors{7.2}		TRUE
	WRKY_tnt.WRKY30_colamp_a	WRKY	WRKY30	AT5G24110	β-Hairpin exposed by an α/β-scaffold{7}	GCM domain factors{7.2}		TRUE
	WRKY_tnt.WRKY31_colamp_a	WRKY	WRKY31	AT4G22070	β-Hairpin exposed by an α/β-scaffold{7}	GCM domain factors{7.2}		TRUE
	WRKY_tnt.WRKY33_col_a	WRKY	WRKY33	AT2G38470	β-Hairpin exposed by an α/β-scaffold{7}	GCM domain factors{7.2}		TRUE
	WRKY_tnt.WRKY40_col_a	WRKY	WRKY40	AT1G80840	β-Hairpin exposed by an α/β-scaffold{7}	GCM domain factors{7.2}		TRUE
	WRKY_tnt.WRKY45_col_a	WRKY	WRKY45	AT3G01970	β-Hairpin exposed by an α/β-scaffold{7}	GCM domain factors{7.2}		TRUE
	WRKY_tnt.WRKY45_colamp_a	WRKY	WRKY45	AT3G01970	β-Hairpin exposed by an α/β-scaffold{7}	GCM domain factors{7.2}		TRUE
	WRKY_tnt.WRKY50_col_a	WRKY	WRKY50	AT5G26170	β-Hairpin exposed by an α/β-scaffold{7}	GCM domain factors{7.2}		TRUE
	WRKY_tnt.WRKY50_colamp_a	WRKY	WRKY50	AT5G26170	β-Hairpin exposed by an α/β-scaffold{7}	GCM domain factors{7.2}		TRUE
	WRKY_tnt.WRKY55_col_a	WRKY	WRKY55	AT2G40740	β-Hairpin exposed by an α/β-scaffold{7}	GCM domain factors{7.2}		TRUE
	WRKY_tnt.WRKY6_colamp_a	WRKY	WRKY6	AT1G62300	β-Hairpin exposed by an α/β-scaffold{7}	GCM domain factors{7.2}		TRUE
	WRKY_tnt.WRKY65_col_a	WRKY	WRKY65	AT1G29280	β-Hairpin exposed by an α/β-scaffold{7}	GCM domain factors{7.2}		TRUE
	WRKY_tnt.WRKY65_colamp_a	WRKY	WRKY65	AT1G29280	β-Hairpin exposed by an α/β-scaffold{7}	GCM domain factors{7.2}		TRUE
	WRKY_tnt.WRKY70_col200_a	WRKY	WRKY70	AT3G56400	β-Hairpin exposed by an α/β-scaffold{7}	GCM domain factors{7.2}		TRUE
	WRKY_tnt.WRKY71_col_a	WRKY	WRKY71	AT1G29860	β-Hairpin exposed by an α/β-scaffold{7}	GCM domain factors{7.2}		TRUE
	WRKY_tnt.WRKY75_col_a	WRKY	WRKY75	AT5G13080	β-Hairpin exposed by an α/β-scaffold{7}	GCM domain factors{7.2}		TRUE
	WRKY_tnt.WRKY75_colamp_a	WRKY	WRKY75	AT5G13080	β-Hairpin exposed by an α/β-scaffold{7}	GCM domain factors{7.2}		TRUE
	WRKY_tnt.WRKY8_col100_a	WRKY	WRKY8	AT5G46350	β-Hairpin exposed by an α/β-scaffold{7}	GCM domain factors{7.2}		TRUE
	WRKY_tnt.WRKY8_colamp_a	WRKY	WRKY8	AT5G46350	β-Hairpin exposed by an α/β-scaffold{7}	GCM domain factors{7.2}		TRUE
	WRKY_tnt.WRKY8_col_b	WRKY	WRKY8	AT5G46350	β-Hairpin exposed by an α/β-scaffold{7}	GCM domain factors{7.2}		TRUE
	zfGRF_tnt.AT3G42860_col_a	zfGRF	AT3G42860	AT3G42860	Undefined	Undefined	GRF family	FALSE
	ZFHD_tnt.ATHB23_col_b	ZFHD	ATHB23	AT5G39760	Helix-turn-helix domains{3}	Homeo domain factors{3.1}		TRUE
	ZFHD_tnt.ATHB23_colamp_a	ZFHD	ATHB23	AT5G39760	Helix-turn-helix domains{3}	Homeo domain factors{3.1}		TRUE
	ZFHD_tnt.ATHB24_colamp_a	ZFHD	ATHB24	AT2G18350	Helix-turn-helix domains{3}	Homeo domain factors{3.1}		TRUE
	ZFHD_tnt.ATHB25_col_a	ZFHD	ATHB25	AT5G65410	Helix-turn-helix domains{3}	Homeo domain factors{3.1}		TRUE
	ZFHD_tnt.ATHB25_colamp_a	ZFHD	ATHB25	AT5G65410	Helix-turn-helix domains{3}	Homeo domain factors{3.1}		TRUE
	ZFHD_tnt.AtHB32_col200_a	ZFHD	ATHB32	AT1G14687	Helix-turn-helix domains{3}	Homeo domain factors{3.1}		TRUE
	ZFHD_tnt.ATHB33_colamp_a	ZFHD	ATHB33	AT1G75240	Helix-turn-helix domains{3}	Homeo domain factors{3.1}		TRUE
	ZFHD_tnt.ATHB33_col_a	ZFHD	ATHB33	AT1G75240	Helix-turn-helix domains{3}	Homeo domain factors{3.1}		TRUE
	ZFHD_tnt.ATHB34_col_a	ZFHD	ATHB34	AT3G28920	Helix-turn-helix domains{3}	Homeo domain factors{3.1}		TRUE
	ZFHD_tnt.ATHB34_colamp_a	ZFHD	ATHB34	AT3G28920	Helix-turn-helix domains{3}	Homeo domain factors{3.1}		TRUE

## Sheet: Table_S4
Table S4. Description of the preliminary and final filtrations of the ChIP-seq datasets from the benchmark collection for M. musculus with specification of TF classes (Wingender et al., 2015, 2018). The values in the GTRD, AME and TomTom columns mean respectively the numbers of datasets or target TFs extracted from the GTRD (Kolmykov et al., 2021), after the preliminary filtration (before de novo…
TF classes	Datasets			Target TFs
	GTRD	AME	TomTom	GTRD	AME	TomTom
Basic leucine zipper factors (bZIP){1.1}	274	274	253	23	23	20
Basic helix-loop-helix factors (bHLH){1.2}	134	130	99	28	27	22
Basic helix-span-helix factors (bHSH){1.3}	4	4	4	1	1	1
Nuclear receptors with C4 zinc fingers{2.1}	187	180	133	24	23	16
Other C4 zinc finger-type factors{2.2}	22	22	21	5	5	5
C2H2 zinc finger factors{2.3}	227	210	178	32	24	15
DM-type intertwined zinc finger factors{2.5}	2	1	1	2	1	1
CXXC zinc finger factors{2.6}	19	0	0	4	0	0
Homeo domain factors{3.1}	45	43	28	24	23	14
Paired box factors{3.2}	10	10	9	3	3	3
Fork head / winged helix factors{3.3}	66	66	39	15	15	10
Tryptophan cluster factors{3.5}	189	189	139	19	19	12
TEA domain factors{3.6}	6	6	6	2	2	2
High-mobility group (HMG) domain factors{4.1}	20	19	13	10	9	6
MADS box factors{5.1}	25	25	14	4	4	3
SAND domain factors{5.3}	1	0	0	1	0	0
Rel homology region (RHR) factors{6.1}	114	114	87	9	9	7
STAT domain factors{6.2}	105	105	64	7	7	3
p53 domain factors{6.3}	31	31	25	1	1	1
Runt domain factors{6.4}	35	35	25	3	3	3
T-Box factors{6.5}	13	13	7	5	5	2
Grainyhead domain factors{6.7}	3	3	3	1	1	1
SMAD/NF-1 DNA-binding domain factors{7.1}	9	9	1	2	2	1
TATA-binding proteins{8.1}	4	4	0	1	1	0
Uncharacterized{0.0}	8	0	0	2	0	0
Total collection	1553	1493	1149	228	208	148

## Sheet: Table_S5
Table S5. Description the preliminary and final filtration steps of the ChIP-seq datasets from the benchmark collection for A. thaliana with specification of TF classes (Castro-Mondragon et al., 2022; Blanc-Mathieu et al., 2023). The values in the GTRD, AME and TomTom columns mean respectively the numbers of datasets or target TFs extracted from the GTRD (Kolmykov et al., 2021), after the prelimi…
TF classes	Datasets			Target TFs
	GTRD	AME	TomTom	GTRD	AME	TomTom
Basic leucine zipper factors (bZIP){1.1}	12	12	12	6	6	6
Basic helix-loop-helix factors (bHLH){1.2}	12	12	12	6	6	6
Other C4 zinc finger-type factors{2.2}	2	0	0	2	0	0
C2H2 zinc finger factors{2.3}	11	11	9	4	4	3
CXXC zinc finger factors{2.6}	1	0	0	1	0	0
Homeo domain factors{3.1}	11	11	6	6	6	3
Heat shock factors{3.4}	6	6	2	3	3	1
Tryptophan cluster factors{3.5}	23	21	8	12	11	5
LEAFY{3.*}	1	0	0	1	0	0
MADS box factors{5.1}	13	11	8	6	5	4
GCM domain factors{7.2}	17	16	13	5	4	3
AP2/EREBP{7.*}	6	6	3	4	4	2
Ribbon-Helix-Helix factors{7.*}	2	2	1	1	1	1
B3{9.*}	1	1	0	1	1	0
BBR/BPC{0.*}	1	0	0	1	0	0
GRAS{0.*}	2	1	0	1	0	0
Total collection	121	110	74	60	51	34

## Sheet: Table_S6
Table S6. Description the DAP-seq datasets from the benchmark collection for A. thaliana with specification of TF classes (Castro-Mondragon et al., 2022; Blanc-Mathieu et al., 2023). The values in the Plant Cistrome (O'Malley et al., 2016) columns mean respectively the numbers of datasets or target TFs extracted from the GTRD. Asterisks indicate TF classes absent in mammals (TFClass).
TF classes	Datasets	Target TFs
	Plant Cistrome	Plant Cistrome
Basic leucine zipper factors (bZIP){1.1}	44	23
Basic helix-loop-helix factors (bHLH){1.2}	10	7
Other C4 zinc finger-type factors{2.2}	41	29
C2H2 zinc finger factors{2.3}	14	12
C3H zinc finger factors{2.8}	0	0
SBP{2.*}	8	5
Homeo domain factors{3.1}	31	20
Fork head / winged helix factors{3.3}	1	1
Heat shock factors{3.4}	9	5
Tryptophan cluster factors{3.5}	115	75
ARID{3.*}	1	1
EIL{4.*}	1	1
MADS box factors{5.1}	3	3
GCM domain factors{7.2}	120	67
AP2/EREBP{7.*}	76	46
Ribbon-Helix-Helix factors{7.*}	6	4
B3{9.*}	8	6
Total collection	488	305

## Sheet: Table_S7
Table S7. The significances of of asymmetry within homotypic CEs for various thresholds of asymmetry ratio (TAR) for the the benchmark collection of M. musculus ChIP-seq data
GTRD		TFCLass		Threshold for Asymmetry Ratio
GTRD ID	TF	Superclass	Class	1.1	1.5	2
PEAKS035194	NR1D1	Zinc-coordinating DNA-binding domains{2}	Nuclear receptors with C4 zinc fingers {2.1}	15.74	10.31	8.81
PEAKS035249	FOXA2	Helix-turn-helix domains{3}	Fork head / winged helix factors {3.3}	29.71	16.02	33.33
PEAKS035258	CTCF	Zinc-coordinating DNA-binding domains{2}	C2H2 zinc finger factors {2.3}	29.01	16.31	9
PEAKS035260	GATA2	Zinc-coordinating DNA-binding domains{2}	C4 zinc finger-type factors {2.2}	0	0	14.65
PEAKS035263	BCL6	Zinc-coordinating DNA-binding domains{2}	C2H2 zinc finger factors {2.3}	12.08	10.34	10.68
PEAKS035264	BCL6	Zinc-coordinating DNA-binding domains{2}	C2H2 zinc finger factors {2.3}	22.53	16.2	0
PEAKS035277	STAT1	Immunoglobulin fold{6}	STAT domain factors {6.2}	0	0	7.65
PEAKS035279	STAT1	Immunoglobulin fold{6}	STAT domain factors {6.2}	21.44	12.85	11.51
PEAKS035296	STAT5A	Immunoglobulin fold{6}	STAT domain factors {6.2}	15.06	0	0
PEAKS035298	STAT5A	Immunoglobulin fold{6}	STAT domain factors {6.2}	29.1	12.21	8.23
PEAKS035299	STAT5B	Immunoglobulin fold{6}	STAT domain factors {6.2}	23.69	12.75	0
PEAKS035301	STAT4	Immunoglobulin fold{6}	STAT domain factors {6.2}	14.62	7.19	9.36
PEAKS035310	CRX	Helix-turn-helix domains{3}	Homeo domain factors {3.1}	68.31	41.95	8.69
PEAKS035311	CRX	Helix-turn-helix domains{3}	Homeo domain factors {3.1}	62.96	38.1	0
PEAKS035331	GATA1	Zinc-coordinating DNA-binding domains{2}	C4 zinc finger-type factors {2.2}	45.18	26.12	31.15
PEAKS035335	MYB	Helix-turn-helix domains{3}	Tryptophan cluster factors {3.5}	41.08	18.22	24.58
PEAKS035358	RELA	Immunoglobulin fold{6}	Rel homology region (RHR) factors {6.1}	23.68	9.2	19.22
PEAKS035381	CDX2	Helix-turn-helix domains{3}	Homeo domain factors {3.1}	49.89	25.69	12.4
PEAKS035427	ATOH1	Basic domains{1}	Basic helix-loop-helix factors (bHLH) {1.2}	281.97	157.92	0
PEAKS035465	CTCF	Zinc-coordinating DNA-binding domains{2}	C2H2 zinc finger factors {2.3}	23.99	15.33	6.85
PEAKS035467	MAX	Basic domains{1}	Basic helix-loop-helix factors (bHLH) {1.2}	128.66	73.8	21.84
PEAKS035469	TCF12	Basic domains{1}	Basic helix-loop-helix factors (bHLH) {1.2}	47.46	19.18	104.76
PEAKS035471	CTCF	Zinc-coordinating DNA-binding domains{2}	C2H2 zinc finger factors {2.3}	22.57	10.73	0
PEAKS035472	CTCF	Zinc-coordinating DNA-binding domains{2}	C2H2 zinc finger factors {2.3}	25.05	10.12	12.55
PEAKS035477	CTCF	Zinc-coordinating DNA-binding domains{2}	C2H2 zinc finger factors {2.3}	16.62	12.54	54.42
PEAKS035479	CTCF	Zinc-coordinating DNA-binding domains{2}	C2H2 zinc finger factors {2.3}	28.22	16.09	12.13
PEAKS035480	CTCF	Zinc-coordinating DNA-binding domains{2}	C2H2 zinc finger factors {2.3}	29.68	18.69	6.96
PEAKS035481	GATA1	Zinc-coordinating DNA-binding domains{2}	C4 zinc finger-type factors {2.2}	44.71	29.56	9.19
PEAKS035487	CTCF	Zinc-coordinating DNA-binding domains{2}	C2H2 zinc finger factors {2.3}	42.76	18.29	10.39
PEAKS035492	CTCF	Zinc-coordinating DNA-binding domains{2}	C2H2 zinc finger factors {2.3}	16.17	9.08	12.6
PEAKS035495	MYOD1	Basic domains{1}	Basic helix-loop-helix factors (bHLH) {1.2}	21.77	6.93	12.75
PEAKS035498	CTCF	Zinc-coordinating DNA-binding domains{2}	C2H2 zinc finger factors {2.3}	39.72	14.67	19.82
PEAKS035504	CTCF	Zinc-coordinating DNA-binding domains{2}	C2H2 zinc finger factors {2.3}	23.98	17.43	15.53
PEAKS035505	CEBPB	Basic domains{1}	Basic leucine zipper factors (bZIP) {1.1}	22.85	11.52	7.23
PEAKS035507	CTCF	Zinc-coordinating DNA-binding domains{2}	C2H2 zinc finger factors {2.3}	35.57	25.31	0
PEAKS035508	USF1	Basic domains{1}	Basic helix-loop-helix factors (bHLH) {1.2}	17.41	9.58	10.65
PEAKS035509	MYOG	Basic domains{1}	Basic helix-loop-helix factors (bHLH) {1.2}	176.23	129.96	12.35
PEAKS035512	CEBPB	Basic domains{1}	Basic leucine zipper factors (bZIP) {1.1}	23.85	20.7	7.98
PEAKS035515	FLI1	Helix-turn-helix domains{3}	Tryptophan cluster factors {3.5}	89.89	49.03	17.7
PEAKS035518	GATA1	Zinc-coordinating DNA-binding domains{2}	C4 zinc finger-type factors {2.2}	0	0	5.4
PEAKS035519	CTCF	Zinc-coordinating DNA-binding domains{2}	C2H2 zinc finger factors {2.3}	16.12	12.38	104.31
PEAKS035523	CTCF	Zinc-coordinating DNA-binding domains{2}	C2H2 zinc finger factors {2.3}	34.64	28.99	16.39
PEAKS035524	CTCF	Zinc-coordinating DNA-binding domains{2}	C2H2 zinc finger factors {2.3}	37.53	22.28	38.02
PEAKS035526	CTCF	Zinc-coordinating DNA-binding domains{2}	C2H2 zinc finger factors {2.3}	17.52	10.46	0
PEAKS035549	EBF1	Immunoglobulin fold{6}	Rel homology region (RHR) factors {6.1}	8.1	0	6.36
PEAKS035567	CTCF	Zinc-coordinating DNA-binding domains{2}	C2H2 zinc finger factors {2.3}	28.44	19.05	16.25
PEAKS035573	CTCF	Zinc-coordinating DNA-binding domains{2}	C2H2 zinc finger factors {2.3}	36.77	19.39	14.5
PEAKS035584	MYBL1	Helix-turn-helix domains{3}	Tryptophan cluster factors {3.5}	0	0	8.97
PEAKS035586	AR	Zinc-coordinating DNA-binding domains{2}	Nuclear receptors with C4 zinc fingers {2.1}	20.67	11.76	0
PEAKS035587	ERG	Helix-turn-helix domains{3}	Tryptophan cluster factors {3.5}	58.43	35.09	7.98
PEAKS035588	AR	Zinc-coordinating DNA-binding domains{2}	Nuclear receptors with C4 zinc fingers {2.1}	16.56	10.88	11.33
PEAKS035589	ERG	Helix-turn-helix domains{3}	Tryptophan cluster factors {3.5}	90.27	46.64	11.97
PEAKS035590	AR	Zinc-coordinating DNA-binding domains{2}	Nuclear receptors with C4 zinc fingers {2.1}	9.2	0	0
PEAKS035592	AR	Zinc-coordinating DNA-binding domains{2}	Nuclear receptors with C4 zinc fingers {2.1}	8.03	0	8.4
PEAKS035596	PTF1A	Basic domains{1}	Basic helix-loop-helix factors (bHLH) {1.2}	16.24	11.37	24.8
PEAKS035598	RBPJL	Immunoglobulin fold{6}	Rel homology region (RHR) factors {6.1}	16.96	10.98	8.21
PEAKS035599	FOXA2	Helix-turn-helix domains{3}	Fork head / winged helix factors {3.3}	22.76	16.04	31.75
PEAKS035604	ESR1	Zinc-coordinating DNA-binding domains{2}	Nuclear receptors with C4 zinc fingers {2.1}	19.94	14.73	0
PEAKS035607	RELA	Immunoglobulin fold{6}	Rel homology region (RHR) factors {6.1}	31.46	14.69	0
PEAKS035608	RELA	Immunoglobulin fold{6}	Rel homology region (RHR) factors {6.1}	30.1	20.18	7.22
PEAKS035613	CEBPB	Basic domains{1}	Basic leucine zipper factors (bZIP) {1.1}	158.1	135.6	6.69
PEAKS035614	CEBPB	Basic domains{1}	Basic leucine zipper factors (bZIP) {1.1}	41.08	25.69	11.45
PEAKS035616	CEBPB	Basic domains{1}	Basic leucine zipper factors (bZIP) {1.1}	24.95	13.05	11.86
PEAKS035635	BATF	Basic domains{1}	Basic leucine zipper factors (bZIP) {1.1}	14.6	6.9	6.07
PEAKS035639	STAT5A	Immunoglobulin fold{6}	STAT domain factors {6.2}	30.75	19.17	10.12
PEAKS035640	STAT5B	Immunoglobulin fold{6}	STAT domain factors {6.2}	35.71	11.97	106.84
PEAKS035642	STAT5B	Immunoglobulin fold{6}	STAT domain factors {6.2}	18.01	6.84	17.83
PEAKS035661	ERG	Helix-turn-helix domains{3}	Tryptophan cluster factors {3.5}	56.16	31.21	65.88
PEAKS035677	CEBPA	Basic domains{1}	Basic leucine zipper factors (bZIP) {1.1}	62	41.02	0
PEAKS035678	FOXA2	Helix-turn-helix domains{3}	Fork head / winged helix factors {3.3}	27.39	14.77	18.84
PEAKS035694	PAX7	Helix-turn-helix domains{3}	Paired box factors {3.2}	11.05	0	18.72
PEAKS035725	CTCF	Zinc-coordinating DNA-binding domains{2}	C2H2 zinc finger factors {2.3}	21.88	12.68	31.09
PEAKS035727	CTCF	Zinc-coordinating DNA-binding domains{2}	C2H2 zinc finger factors {2.3}	25.32	15.67	13.75
PEAKS035728	CTCF	Zinc-coordinating DNA-binding domains{2}	C2H2 zinc finger factors {2.3}	25.45	20.3	75.88
PEAKS035729	CTCF	Zinc-coordinating DNA-binding domains{2}	C2H2 zinc finger factors {2.3}	21.46	14.05	0
PEAKS035731	CTCF	Zinc-coordinating DNA-binding domains{2}	C2H2 zinc finger factors {2.3}	29.56	13.39	10.47
PEAKS035732	CTCF	Zinc-coordinating DNA-binding domains{2}	C2H2 zinc finger factors {2.3}	42.59	19.09	13.35
PEAKS035739	CTCF	Zinc-coordinating DNA-binding domains{2}	C2H2 zinc finger factors {2.3}	31.58	18.81	11.87
PEAKS035740	CTCF	Zinc-coordinating DNA-binding domains{2}	C2H2 zinc finger factors {2.3}	38.8	20.59	10.2
PEAKS035741	CTCF	Zinc-coordinating DNA-binding domains{2}	C2H2 zinc finger factors {2.3}	27.67	16.56	13.56
PEAKS035742	CTCF	Zinc-coordinating DNA-binding domains{2}	C2H2 zinc finger factors {2.3}	30.14	16.02	12.46
PEAKS035743	CTCF	Zinc-coordinating DNA-binding domains{2}	C2H2 zinc finger factors {2.3}	49.85	18.68	11.09
PEAKS035767	IKZF3	Zinc-coordinating DNA-binding domains{2}	C2H2 zinc finger factors {2.3}	15.06	9.21	15.4
PEAKS035768	IKZF1	Zinc-coordinating DNA-binding domains{2}	C2H2 zinc finger factors {2.3}	16.37	9.16	14.24
PEAKS035774	RUNX1	Immunoglobulin fold{6}	Runt domain factors {6.4}	15.81	9.09	17.41
PEAKS035778	IKZF1	Zinc-coordinating DNA-binding domains{2}	C2H2 zinc finger factors {2.3}	27.19	16.7	11.96
PEAKS035779	IKZF1	Zinc-coordinating DNA-binding domains{2}	C2H2 zinc finger factors {2.3}	30.2	15.66	13.25
PEAKS035790	HNF4A	Zinc-coordinating DNA-binding domains{2}	Nuclear receptors with C4 zinc fingers {2.1}	37.12	21.86	11.03
PEAKS035791	HNF4A	Zinc-coordinating DNA-binding domains{2}	Nuclear receptors with C4 zinc fingers {2.1}	18.9	14.24	5.23
PEAKS035805	TCF7L2	Other all-alpha-helical DNA-binding domains{4}	High-mobility group (HMG) domain factors {4.1}	24.32	14.89	6.92
PEAKS035836	EBF1	Immunoglobulin fold{6}	Rel homology region (RHR) factors {6.1}	210.84	167.07	7.02
PEAKS035848	CTCF	Zinc-coordinating DNA-binding domains{2}	C2H2 zinc finger factors {2.3}	25.86	13.96	8.97
PEAKS035849	CTCF	Zinc-coordinating DNA-binding domains{2}	C2H2 zinc finger factors {2.3}	28.38	12.92	8.66
PEAKS035850	CTCF	Zinc-coordinating DNA-binding domains{2}	C2H2 zinc finger factors {2.3}	29.99	17.99	0
PEAKS035851	CTCF	Zinc-coordinating DNA-binding domains{2}	C2H2 zinc finger factors {2.3}	34.74	27.31	14.88
PEAKS035856	E2F4	Helix-turn-helix domains{3}	Fork head / winged helix factors {3.3}	26.57	14.63	9.71
PEAKS035858	E2F4	Helix-turn-helix domains{3}	Fork head / winged helix factors {3.3}	50.82	23.48	7.05
PEAKS035859	E2F4	Helix-turn-helix domains{3}	Fork head / winged helix factors {3.3}	31.24	11.67	14.05
PEAKS035869	IRF1	Helix-turn-helix domains{3}	Tryptophan cluster factors {3.5}	-127	-77.51	130.81
PEAKS035871	IRF1	Helix-turn-helix domains{3}	Tryptophan cluster factors {3.5}	-11.73	-21.54	10.18
PEAKS035876	EGR2	Zinc-coordinating DNA-binding domains{2}	C2H2 zinc finger factors {2.3}	18.23	11	12.32
PEAKS035877	EGR2	Zinc-coordinating DNA-binding domains{2}	C2H2 zinc finger factors {2.3}	0	-5.87	16.2
PEAKS035878	EGR2	Zinc-coordinating DNA-binding domains{2}	C2H2 zinc finger factors {2.3}	-10.53	-13.67	21.84
PEAKS035879	EGR2	Zinc-coordinating DNA-binding domains{2}	C2H2 zinc finger factors {2.3}	-21.43	-18.48	11.77
PEAKS035880	MAFF	Basic domains{1}	Basic leucine zipper factors (bZIP) {1.1}	14.15	8.24	7.62
PEAKS035881	MAFF	Basic domains{1}	Basic leucine zipper factors (bZIP) {1.1}	13.54	9.5	17.88
PEAKS035882	MAFF	Basic domains{1}	Basic leucine zipper factors (bZIP) {1.1}	20.86	14.24	6.81
PEAKS035883	MAFF	Basic domains{1}	Basic leucine zipper factors (bZIP) {1.1}	14.01	11.51	-41.21
PEAKS035889	RELB	Immunoglobulin fold{6}	Rel homology region (RHR) factors {6.1}	22.36	12.28	-17.16
PEAKS035893	RELA	Immunoglobulin fold{6}	Rel homology region (RHR) factors {6.1}	16.59	7.85	8.45
PEAKS035895	RELA	Immunoglobulin fold{6}	Rel homology region (RHR) factors {6.1}	18.72	8.93	0
PEAKS035897	RUNX1	Immunoglobulin fold{6}	Runt domain factors {6.4}	6.28	0	-20.38
PEAKS035898	RUNX1	Immunoglobulin fold{6}	Runt domain factors {6.4}	7.36	0	-20.11
PEAKS035911	REL	Immunoglobulin fold{6}	Rel homology region (RHR) factors {6.1}	11.69	0	7.05
PEAKS035919	EGR1	Zinc-coordinating DNA-binding domains{2}	C2H2 zinc finger factors {2.3}	56.46	27.53	7.97
PEAKS035948	ESR1	Zinc-coordinating DNA-binding domains{2}	Nuclear receptors with C4 zinc fingers {2.1}	10.57	15.27	14.01
PEAKS035949	ESR1	Zinc-coordinating DNA-binding domains{2}	Nuclear receptors with C4 zinc fingers {2.1}	32.91	16.13	7.19
PEAKS035954	STAT5A	Immunoglobulin fold{6}	STAT domain factors {6.2}	14.78	11.86	5.14
PEAKS035955	STAT5B	Immunoglobulin fold{6}	STAT domain factors {6.2}	14.17	5.39	0
PEAKS035958	STAT5A	Immunoglobulin fold{6}	STAT domain factors {6.2}	18.38	14.16	5.02
PEAKS035959	STAT5B	Immunoglobulin fold{6}	STAT domain factors {6.2}	7.4	0	0
PEAKS035964	MYC	Basic domains{1}	Basic helix-loop-helix factors (bHLH) {1.2}	20.2	6.1	7.22
PEAKS035975	IKZF1	Zinc-coordinating DNA-binding domains{2}	C2H2 zinc finger factors {2.3}	155.6	75.04	0
PEAKS035976	IKZF1	Zinc-coordinating DNA-binding domains{2}	C2H2 zinc finger factors {2.3}	27.47	10.23	0
PEAKS036034	JUN	Basic domains{1}	Basic leucine zipper factors (bZIP) {1.1}	0	0	0
PEAKS036036	STAT3	Immunoglobulin fold{6}	STAT domain factors {6.2}	12.28	8.2	0
PEAKS036037	BATF	Basic domains{1}	Basic leucine zipper factors (bZIP) {1.1}	6.98	0	9.6
PEAKS036041	BATF	Basic domains{1}	Basic leucine zipper factors (bZIP) {1.1}	0	0	20.3
PEAKS036045	BATF	Basic domains{1}	Basic leucine zipper factors (bZIP) {1.1}	16.29	9.25	18.95
PEAKS036047	JUNB	Basic domains{1}	Basic leucine zipper factors (bZIP) {1.1}	23.35	0	14.38
PEAKS036049	JUND	Basic domains{1}	Basic leucine zipper factors (bZIP) {1.1}	16.69	8.84	9.59
PEAKS036050	STAT3	Immunoglobulin fold{6}	STAT domain factors {6.2}	29.08	14.82	5.12
PEAKS036054	SIX2	Helix-turn-helix domains{3}	Homeo domain factors {3.1}	13.54	8.75	11.25
PEAKS036055	SIX2	Helix-turn-helix domains{3}	Homeo domain factors {3.1}	15.68	7.71	0
PEAKS036060	CTCF	Zinc-coordinating DNA-binding domains{2}	C2H2 zinc finger factors {2.3}	30.33	21.92	7.77
PEAKS036061	CTCF	Zinc-coordinating DNA-binding domains{2}	C2H2 zinc finger factors {2.3}	26.66	15.66	58.6
PEAKS036075	FOXO1	Helix-turn-helix domains{3}	Fork head / winged helix factors {3.3}	0	0	6.61
PEAKS036079	ELF1	Helix-turn-helix domains{3}	Tryptophan cluster factors {3.5}	72.65	37.22	0
PEAKS036085	YY1	Zinc-coordinating DNA-binding domains{2}	C2H2 zinc finger factors {2.3}	16.97	13.34	5.9
PEAKS036086	NKX6-1	Helix-turn-helix domains{3}	Homeo domain factors {3.1}	29.21	16.66	0
PEAKS036104	PPARG	Zinc-coordinating DNA-binding domains{2}	Nuclear receptors with C4 zinc fingers {2.1}	26.03	16.66	0
PEAKS036106	CTCF	Zinc-coordinating DNA-binding domains{2}	C2H2 zinc finger factors {2.3}	40.17	27.15	0
PEAKS036107	CTCF	Zinc-coordinating DNA-binding domains{2}	C2H2 zinc finger factors {2.3}	46.25	32.92	7.85
PEAKS036124	NFE2	Basic domains{1}	Basic leucine zipper factors (bZIP) {1.1}	13	8.31	0
PEAKS036125	CEBPA	Basic domains{1}	Basic leucine zipper factors (bZIP) {1.1}	53.65	33.75	0
PEAKS036126	CEBPA	Basic domains{1}	Basic leucine zipper factors (bZIP) {1.1}	43.31	27.92	5.17
PEAKS036127	CEBPA	Basic domains{1}	Basic leucine zipper factors (bZIP) {1.1}	40.26	20.92	9.44
PEAKS036128	CEBPA	Basic domains{1}	Basic leucine zipper factors (bZIP) {1.1}	43.55	23.08	7.06
PEAKS036129	CEBPA	Basic domains{1}	Basic leucine zipper factors (bZIP) {1.1}	65.16	35.68	5.47
PEAKS036130	CEBPA	Basic domains{1}	Basic leucine zipper factors (bZIP) {1.1}	41.39	24.14	14.06
PEAKS036131	CEBPA	Basic domains{1}	Basic leucine zipper factors (bZIP) {1.1}	103.5	66.57	12.24
PEAKS036132	CEBPA	Basic domains{1}	Basic leucine zipper factors (bZIP) {1.1}	122.91	65.51	0
PEAKS036133	CEBPB	Basic domains{1}	Basic leucine zipper factors (bZIP) {1.1}	36.23	15.65	25
PEAKS036134	CEBPB	Basic domains{1}	Basic leucine zipper factors (bZIP) {1.1}	27.89	15.62	26.22
PEAKS036135	CEBPB	Basic domains{1}	Basic leucine zipper factors (bZIP) {1.1}	62.05	38.07	7.41
PEAKS036136	CEBPB	Basic domains{1}	Basic leucine zipper factors (bZIP) {1.1}	45.49	18.75	7.96
PEAKS036137	CEBPB	Basic domains{1}	Basic leucine zipper factors (bZIP) {1.1}	66.58	34.19	10.6
PEAKS036138	CEBPB	Basic domains{1}	Basic leucine zipper factors (bZIP) {1.1}	27.42	16.47	8.64
PEAKS036139	CEBPB	Basic domains{1}	Basic leucine zipper factors (bZIP) {1.1}	36.34	22.09	14.09
PEAKS036140	CEBPB	Basic domains{1}	Basic leucine zipper factors (bZIP) {1.1}	31.13	17.43	17.95
PEAKS036142	IKZF1	Zinc-coordinating DNA-binding domains{2}	C2H2 zinc finger factors {2.3}	10.02	9.71	11.88
PEAKS036144	GATA1	Zinc-coordinating DNA-binding domains{2}	C4 zinc finger-type factors {2.2}	51.55	34.97	18.56
PEAKS036166	ESR1	Zinc-coordinating DNA-binding domains{2}	Nuclear receptors with C4 zinc fingers {2.1}	18.97	26.22	26.8
PEAKS036172	ESRRA	Zinc-coordinating DNA-binding domains{2}	Nuclear receptors with C4 zinc fingers {2.1}	15.43	5.48	6.71
PEAKS036174	CTCF	Zinc-coordinating DNA-binding domains{2}	C2H2 zinc finger factors {2.3}	37.64	31.31	27.26
PEAKS036191	RUNX1	Immunoglobulin fold{6}	Runt domain factors {6.4}	35.78	20.93	19.19
PEAKS036204	BACH2	Basic domains{1}	Basic leucine zipper factors (bZIP) {1.1}	14.28	7.28	14.82
PEAKS036205	CEBPB	Basic domains{1}	Basic leucine zipper factors (bZIP) {1.1}	31.56	9.69	16.41
PEAKS036208	CEBPB	Basic domains{1}	Basic leucine zipper factors (bZIP) {1.1}	72.64	40.16	22.3
PEAKS036209	NR3C1	Zinc-coordinating DNA-binding domains{2}	Nuclear receptors with C4 zinc fingers {2.1}	15.32	0	17.02
PEAKS036210	CEBPB	Basic domains{1}	Basic leucine zipper factors (bZIP) {1.1}	70.23	34.7	51.71
PEAKS036211	NR3C1	Zinc-coordinating DNA-binding domains{2}	Nuclear receptors with C4 zinc fingers {2.1}	14.34	0	47.12
PEAKS036212	NR3C1	Zinc-coordinating DNA-binding domains{2}	Nuclear receptors with C4 zinc fingers {2.1}	5.04	0	10.64
PEAKS036214	NR3C1	Zinc-coordinating DNA-binding domains{2}	Nuclear receptors with C4 zinc fingers {2.1}	15.17	5.46	9.99
PEAKS036216	NR3C1	Zinc-coordinating DNA-binding domains{2}	Nuclear receptors with C4 zinc fingers {2.1}	15.32	8.41	28.1
PEAKS036219	ESR1	Zinc-coordinating DNA-binding domains{2}	Nuclear receptors with C4 zinc fingers {2.1}	20.08	12.95	12.7
PEAKS036220	ESR1	Zinc-coordinating DNA-binding domains{2}	Nuclear receptors with C4 zinc fingers {2.1}	17.46	5.37	22.02
PEAKS036233	EGR2	Zinc-coordinating DNA-binding domains{2}	C2H2 zinc finger factors {2.3}	30.53	11.04	12.27
PEAKS036237	SPI1	Helix-turn-helix domains{3}	Tryptophan cluster factors {3.5}	64.34	43.41	18.52
PEAKS036239	SPI1	Helix-turn-helix domains{3}	Tryptophan cluster factors {3.5}	29.56	25.38	10.62
PEAKS036241	CEBPA	Basic domains{1}	Basic leucine zipper factors (bZIP) {1.1}	196.82	109.29	6.41
PEAKS036243	CEBPA	Basic domains{1}	Basic leucine zipper factors (bZIP) {1.1}	55.17	42.43	25.94
PEAKS036247	RELA	Immunoglobulin fold{6}	Rel homology region (RHR) factors {6.1}	24.16	11.06	32.32
PEAKS036248	RELA	Immunoglobulin fold{6}	Rel homology region (RHR) factors {6.1}	23.72	8.27	6.48
PEAKS036251	SPI1	Helix-turn-helix domains{3}	Tryptophan cluster factors {3.5}	47.29	30.14	23.54
PEAKS036252	SPI1	Helix-turn-helix domains{3}	Tryptophan cluster factors {3.5}	50.73	30.5	15.07
PEAKS036253	TCF7	Other all-alpha-helical DNA-binding domains{4}	High-mobility group (HMG) domain factors {4.1}	24.42	11.17	11.7
PEAKS036254	TCF7	Other all-alpha-helical DNA-binding domains{4}	High-mobility group (HMG) domain factors {4.1}	26.28	16.94	5.97
PEAKS036255	RXRA	Zinc-coordinating DNA-binding domains{2}	Nuclear receptors with C4 zinc fingers {2.1}	35.73	17.55	5.24
PEAKS036257	FOXO1	Helix-turn-helix domains{3}	Fork head / winged helix factors {3.3}	6.72	6.94	94.43
PEAKS036258	FOXO1	Helix-turn-helix domains{3}	Fork head / winged helix factors {3.3}	0	0	27.86
PEAKS036271	CTCF	Zinc-coordinating DNA-binding domains{2}	C2H2 zinc finger factors {2.3}	43.95	27.77	0
PEAKS036274	FOXA1	Helix-turn-helix domains{3}	Fork head / winged helix factors {3.3}	25.17	12.28	25.18
PEAKS036276	TFAP2A	Basic domains{1}	Basic helix-span-helix factors (bHSH) {1.3}	6.74	0	0
PEAKS036278	HNF4A	Zinc-coordinating DNA-binding domains{2}	Nuclear receptors with C4 zinc fingers {2.1}	33.52	20	0
PEAKS036280	TFAP2A	Basic domains{1}	Basic helix-span-helix factors (bHSH) {1.3}	23.71	8.05	0
PEAKS036281	AR	Zinc-coordinating DNA-binding domains{2}	Nuclear receptors with C4 zinc fingers {2.1}	8.85	5.3	0
PEAKS036285	AR	Zinc-coordinating DNA-binding domains{2}	Nuclear receptors with C4 zinc fingers {2.1}	12.67	6.38	11.29
PEAKS036286	FOXA1	Helix-turn-helix domains{3}	Fork head / winged helix factors {3.3}	46.05	28.03	0
PEAKS036287	AR	Zinc-coordinating DNA-binding domains{2}	Nuclear receptors with C4 zinc fingers {2.1}	31.04	14.64	0
PEAKS036289	AR	Zinc-coordinating DNA-binding domains{2}	Nuclear receptors with C4 zinc fingers {2.1}	34.48	14.17	9.41
PEAKS036290	TFAP2A	Basic domains{1}	Basic helix-span-helix factors (bHSH) {1.3}	24.87	8.1	8.92
PEAKS036291	TFAP2A	Basic domains{1}	Basic helix-span-helix factors (bHSH) {1.3}	34.8	12.01	26.82
PEAKS036303	STAT5A	Immunoglobulin fold{6}	STAT domain factors {6.2}	34.72	9.29	15.19
PEAKS036304	STAT5A	Immunoglobulin fold{6}	STAT domain factors {6.2}	18.9	0	90.07
PEAKS036305	SPI1	Helix-turn-helix domains{3}	Tryptophan cluster factors {3.5}	75.94	60.14	28.63
PEAKS036306	SPI1	Helix-turn-helix domains{3}	Tryptophan cluster factors {3.5}	55.17	29.7	0
PEAKS036307	SPI1	Helix-turn-helix domains{3}	Tryptophan cluster factors {3.5}	97.25	63.27	0
PEAKS036309	SPI1	Helix-turn-helix domains{3}	Tryptophan cluster factors {3.5}	67.06	46.69	21.72
PEAKS036311	RELA	Immunoglobulin fold{6}	Rel homology region (RHR) factors {6.1}	29.5	9.9	22.34
PEAKS036312	RELA	Immunoglobulin fold{6}	Rel homology region (RHR) factors {6.1}	19.63	9.24	10.13
PEAKS036315	RELA	Immunoglobulin fold{6}	Rel homology region (RHR) factors {6.1}	24.15	8.1	13.73
PEAKS036316	CEBPA	Basic domains{1}	Basic leucine zipper factors (bZIP) {1.1}	250.9	180.22	10.57
PEAKS036318	SPI1	Helix-turn-helix domains{3}	Tryptophan cluster factors {3.5}	65.19	46.89	0
PEAKS036319	SPI1	Helix-turn-helix domains{3}	Tryptophan cluster factors {3.5}	74.5	48.34	0
PEAKS036320	RELA	Immunoglobulin fold{6}	Rel homology region (RHR) factors {6.1}	9.94	0	21.32
PEAKS036321	RELA	Immunoglobulin fold{6}	Rel homology region (RHR) factors {6.1}	23.54	6	11.99
PEAKS036322	SPI1	Helix-turn-helix domains{3}	Tryptophan cluster factors {3.5}	87.76	58.67	0
PEAKS036323	SPI1	Helix-turn-helix domains{3}	Tryptophan cluster factors {3.5}	54.73	40.61	9.55
PEAKS036324	RELA	Immunoglobulin fold{6}	Rel homology region (RHR) factors {6.1}	32.68	13.53	0
PEAKS036325	RELA	Immunoglobulin fold{6}	Rel homology region (RHR) factors {6.1}	18.08	13.32	6.54
PEAKS036330	GATA4	Zinc-coordinating DNA-binding domains{2}	C4 zinc finger-type factors {2.2}	29.27	13.64	6.37
PEAKS036336	RUNX3	Immunoglobulin fold{6}	Runt domain factors {6.4}	34.27	26.8	18.11
PEAKS036338	RUNX3	Immunoglobulin fold{6}	Runt domain factors {6.4}	35.46	21.96	11.46
PEAKS036340	RUNX3	Immunoglobulin fold{6}	Runt domain factors {6.4}	34.11	19.53	10.95
PEAKS036341	RUNX3	Immunoglobulin fold{6}	Runt domain factors {6.4}	32.97	18.89	0
PEAKS036349	RUNX3	Immunoglobulin fold{6}	Runt domain factors {6.4}	38.32	17.33	5.49
PEAKS036373	MYOD1	Basic domains{1}	Basic helix-loop-helix factors (bHLH) {1.2}	280.19	204.89	0
PEAKS036387	GFI1	Zinc-coordinating DNA-binding domains{2}	C2H2 zinc finger factors {2.3}	10.67	9.95	0
PEAKS036398	STAT5A	Immunoglobulin fold{6}	STAT domain factors {6.2}	29.12	5.1	46.54
PEAKS036399	STAT5A	Immunoglobulin fold{6}	STAT domain factors {6.2}	18.19	0	24.75
PEAKS036423	EBF1	Immunoglobulin fold{6}	Rel homology region (RHR) factors {6.1}	155.65	120.93	45.61
PEAKS036424	SPI1	Helix-turn-helix domains{3}	Tryptophan cluster factors {3.5}	5.93	0	30.8
PEAKS036425	IRF4	Helix-turn-helix domains{3}	Tryptophan cluster factors {3.5}	16.19	9.77	5.67
PEAKS036426	IKZF1	Zinc-coordinating DNA-binding domains{2}	C2H2 zinc finger factors {2.3}	43.32	25.66	5.78
PEAKS036431	RXRA	Zinc-coordinating DNA-binding domains{2}	Nuclear receptors with C4 zinc fingers {2.1}	29.24	18.37	0
PEAKS036434	RXRA	Zinc-coordinating DNA-binding domains{2}	Nuclear receptors with C4 zinc fingers {2.1}	16.05	8.98	126
PEAKS036449	RXRA	Zinc-coordinating DNA-binding domains{2}	Nuclear receptors with C4 zinc fingers {2.1}	7.45	0	13.52
PEAKS036451	RXRA	Zinc-coordinating DNA-binding domains{2}	Nuclear receptors with C4 zinc fingers {2.1}	15.92	10.48	38.14
PEAKS036452	RXRA	Zinc-coordinating DNA-binding domains{2}	Nuclear receptors with C4 zinc fingers {2.1}	16.34	0	36.83
PEAKS036453	RXRA	Zinc-coordinating DNA-binding domains{2}	Nuclear receptors with C4 zinc fingers {2.1}	18.55	12.2	0
PEAKS036454	RXRA	Zinc-coordinating DNA-binding domains{2}	Nuclear receptors with C4 zinc fingers {2.1}	9.07	0	0
PEAKS036455	RXRA	Zinc-coordinating DNA-binding domains{2}	Nuclear receptors with C4 zinc fingers {2.1}	26.82	15.69	43.41
PEAKS036456	RXRA	Zinc-coordinating DNA-binding domains{2}	Nuclear receptors with C4 zinc fingers {2.1}	19.56	12.39	30.94
PEAKS036488	MYC	Basic domains{1}	Basic helix-loop-helix factors (bHLH) {1.2}	12.17	0	6
PEAKS036502	MAF	Basic domains{1}	Basic leucine zipper factors (bZIP) {1.1}	18.39	12.37	9.5
PEAKS036503	MAF	Basic domains{1}	Basic leucine zipper factors (bZIP) {1.1}	14.86	5.94	7.37
PEAKS036523	SREBF1	Basic domains{1}	Basic helix-loop-helix factors (bHLH) {1.2}	19.55	9.31	23.51
PEAKS036535	SOX4	Other all-alpha-helical DNA-binding domains{4}	High-mobility group (HMG) domain factors {4.1}	20.09	11.32	19.75
PEAKS036541	AR	Zinc-coordinating DNA-binding domains{2}	Nuclear receptors with C4 zinc fingers {2.1}	5.28	0	17.12
PEAKS036542	AR	Zinc-coordinating DNA-binding domains{2}	Nuclear receptors with C4 zinc fingers {2.1}	17.66	13.65	13.89
PEAKS036543	AR	Zinc-coordinating DNA-binding domains{2}	Nuclear receptors with C4 zinc fingers {2.1}	15.08	7.01	11.77
PEAKS036544	AR	Zinc-coordinating DNA-binding domains{2}	Nuclear receptors with C4 zinc fingers {2.1}	9.06	0	9.52
PEAKS036545	AR	Zinc-coordinating DNA-binding domains{2}	Nuclear receptors with C4 zinc fingers {2.1}	7.25	0	128
PEAKS036566	ESR1	Zinc-coordinating DNA-binding domains{2}	Nuclear receptors with C4 zinc fingers {2.1}	28.07	16.77	10.76
PEAKS036567	ESR1	Zinc-coordinating DNA-binding domains{2}	Nuclear receptors with C4 zinc fingers {2.1}	15.9	10.71	0
PEAKS036574	OVOL2	Zinc-coordinating DNA-binding domains{2}	C2H2 zinc finger factors {2.3}	22.52	20.65	0
PEAKS036576	RUNX2	Immunoglobulin fold{6}	Runt domain factors {6.4}	27.2	14.43	91.28
PEAKS036578	JUN	Basic domains{1}	Basic leucine zipper factors (bZIP) {1.1}	167.55	95.22	0
PEAKS036582	BATF	Basic domains{1}	Basic leucine zipper factors (bZIP) {1.1}	18.15	9.42	6.31
PEAKS036635	POU5F1	Helix-turn-helix domains{3}	Homeo domain factors {3.1}	32.39	12.79	17.15
PEAKS036636	POU5F1	Helix-turn-helix domains{3}	Homeo domain factors {3.1}	26.66	12.54	11.8
PEAKS036637	OTX2	Helix-turn-helix domains{3}	Homeo domain factors {3.1}	25.78	12.62	5.12
PEAKS036648	ETS1	Helix-turn-helix domains{3}	Tryptophan cluster factors {3.5}	51.58	31.67	0
PEAKS036666	MYC	Basic domains{1}	Basic helix-loop-helix factors (bHLH) {1.2}	49.26	22.44	9.3
PEAKS036714	MYOD1	Basic domains{1}	Basic helix-loop-helix factors (bHLH) {1.2}	51.05	24.3	0
PEAKS036719	REST	Zinc-coordinating DNA-binding domains{2}	C2H2 zinc finger factors {2.3}	28.02	14.19	7.38
PEAKS036729	MYOD1	Basic domains{1}	Basic helix-loop-helix factors (bHLH) {1.2}	39.63	15.8	0
PEAKS036745	TCF3	Basic domains{1}	Basic helix-loop-helix factors (bHLH) {1.2}	235.37	125.78	13.67
PEAKS036746	MYOG	Basic domains{1}	Basic helix-loop-helix factors (bHLH) {1.2}	161.54	115.93	5.33
PEAKS036759	MYOG	Basic domains{1}	Basic helix-loop-helix factors (bHLH) {1.2}	227.59	137.07	0
PEAKS036886	FLI1	Helix-turn-helix domains{3}	Tryptophan cluster factors {3.5}	72.91	40.62	8.56
PEAKS036889	NFE2	Basic domains{1}	Basic leucine zipper factors (bZIP) {1.1}	13.08	9.84	0
PEAKS036890	NFE2	Basic domains{1}	Basic leucine zipper factors (bZIP) {1.1}	6.8	0	7.87
PEAKS036891	SPI1	Helix-turn-helix domains{3}	Tryptophan cluster factors {3.5}	70.18	40.84	11.48
PEAKS036930	FOXO1	Helix-turn-helix domains{3}	Fork head / winged helix factors {3.3}	17.98	6.9	0
PEAKS037022	JUN	Basic domains{1}	Basic leucine zipper factors (bZIP) {1.1}	38.6	24.44	9.1
PEAKS037023	RUNX1	Immunoglobulin fold{6}	Runt domain factors {6.4}	34.52	16.25	7.09
PEAKS037024	MYOD1	Basic domains{1}	Basic helix-loop-helix factors (bHLH) {1.2}	34.7	13.43	0
PEAKS037025	MYOG	Basic domains{1}	Basic helix-loop-helix factors (bHLH) {1.2}	159.79	91.64	0
PEAKS037140	GATA6	Zinc-coordinating DNA-binding domains{2}	C4 zinc finger-type factors {2.2}	16.1	9.31	11.5
PEAKS037143	FOXA2	Helix-turn-helix domains{3}	Fork head / winged helix factors {3.3}	10.81	7.46	9.09
PEAKS037160	HNF4A	Zinc-coordinating DNA-binding domains{2}	Nuclear receptors with C4 zinc fingers {2.1}	36.09	17.05	15.88
PEAKS037161	HNF4A	Zinc-coordinating DNA-binding domains{2}	Nuclear receptors with C4 zinc fingers {2.1}	39.87	20.54	9.96
PEAKS037163	CTCF	Zinc-coordinating DNA-binding domains{2}	C2H2 zinc finger factors {2.3}	27.53	17.78	62.03
PEAKS037268	NR3C1	Zinc-coordinating DNA-binding domains{2}	Nuclear receptors with C4 zinc fingers {2.1}	13.15	6.97	9.01
PEAKS037270	NR3C1	Zinc-coordinating DNA-binding domains{2}	Nuclear receptors with C4 zinc fingers {2.1}	12.91	5.51	9.67
PEAKS037271	CEBPB	Basic domains{1}	Basic leucine zipper factors (bZIP) {1.1}	61.03	35.01	6.55
PEAKS037272	CEBPB	Basic domains{1}	Basic leucine zipper factors (bZIP) {1.1}	54.53	24.51	10.59
PEAKS037273	CEBPB	Basic domains{1}	Basic leucine zipper factors (bZIP) {1.1}	59.48	36.16	14.33
PEAKS037311	ATF3	Basic domains{1}	Basic leucine zipper factors (bZIP) {1.1}	17.94	6.75	21.72
PEAKS037345	FOXO1	Helix-turn-helix domains{3}	Fork head / winged helix factors {3.3}	7.66	0	10.48
PEAKS037379	ZIC1	Zinc-coordinating DNA-binding domains{2}	C2H2 zinc finger factors {2.3}	91.68	55.14	20.47
PEAKS037388	FOXL2	Helix-turn-helix domains{3}	Fork head / winged helix factors {3.3}	25.82	13.62	14.72
PEAKS037407	IKZF1	Zinc-coordinating DNA-binding domains{2}	C2H2 zinc finger factors {2.3}	26.18	14.1	12.44
PEAKS037408	IKZF1	Zinc-coordinating DNA-binding domains{2}	C2H2 zinc finger factors {2.3}	5.57	0	9.08
PEAKS037447	MEF2D	α-Helices exposed by beta-structures{5}	MADS box factors {5.1}	10.09	0	97.68
PEAKS037537	RELA	Immunoglobulin fold{6}	Rel homology region (RHR) factors {6.1}	5.86	0	108.71
PEAKS037553	FOXL2	Helix-turn-helix domains{3}	Fork head / winged helix factors {3.3}	29.04	17.29	86.42
PEAKS037554	ESR1	Zinc-coordinating DNA-binding domains{2}	Nuclear receptors with C4 zinc fingers {2.1}	24.09	11.73	29.69
PEAKS037583	SPI1	Helix-turn-helix domains{3}	Tryptophan cluster factors {3.5}	57.65	33.69	0
PEAKS037584	SPI1	Helix-turn-helix domains{3}	Tryptophan cluster factors {3.5}	40.53	21.48	7.03
PEAKS037585	SPI1	Helix-turn-helix domains{3}	Tryptophan cluster factors {3.5}	61.98	40.89	0
PEAKS037586	SPI1	Helix-turn-helix domains{3}	Tryptophan cluster factors {3.5}	54.22	36.34	32.55
PEAKS037587	SPI1	Helix-turn-helix domains{3}	Tryptophan cluster factors {3.5}	59.36	39.75	0
PEAKS037588	SPI1	Helix-turn-helix domains{3}	Tryptophan cluster factors {3.5}	59.29	36.36	20.69
PEAKS037590	SPI1	Helix-turn-helix domains{3}	Tryptophan cluster factors {3.5}	75.79	47.51	13.29
PEAKS037591	SPI1	Helix-turn-helix domains{3}	Tryptophan cluster factors {3.5}	81.84	51.2	8.96
PEAKS037592	SPI1	Helix-turn-helix domains{3}	Tryptophan cluster factors {3.5}	69.44	35.95	61.55
PEAKS037593	SPI1	Helix-turn-helix domains{3}	Tryptophan cluster factors {3.5}	77.61	52.53	6.52
PEAKS037594	SPI1	Helix-turn-helix domains{3}	Tryptophan cluster factors {3.5}	84.21	55.74	7.34
PEAKS037674	WT1	Zinc-coordinating DNA-binding domains{2}	C2H2 zinc finger factors {2.3}	14.17	12.6	7.38
PEAKS037701	PPARG	Zinc-coordinating DNA-binding domains{2}	Nuclear receptors with C4 zinc fingers {2.1}	23.02	18.64	14.6
PEAKS037706	NR3C1	Zinc-coordinating DNA-binding domains{2}	Nuclear receptors with C4 zinc fingers {2.1}	12.94	6.24	16.53
PEAKS037776	DMRT1	Zinc-coordinating DNA-binding domains{2}	DM-type intertwined zinc finger factors {2.5}	15.04	6.65	15.52
PEAKS037787	CEBPA	Basic domains{1}	Basic leucine zipper factors (bZIP) {1.1}	63.21	39.06	13.62
PEAKS037802	STAT3	Immunoglobulin fold{6}	STAT domain factors {6.2}	13.21	0	0
PEAKS037804	STAT3	Immunoglobulin fold{6}	STAT domain factors {6.2}	24.48	15.11	6.21
PEAKS037806	STAT1	Immunoglobulin fold{6}	STAT domain factors {6.2}	0	0	0
PEAKS037839	GRHL2	Immunoglobulin fold{6}	Grainyhead domain factors {6.7}	0	0	28.3
PEAKS037844	PRDM1	Zinc-coordinating DNA-binding domains{2}	C2H2 zinc finger factors {2.3}	-22.28	-22.26	13.3
PEAKS037845	IRF1	Helix-turn-helix domains{3}	Tryptophan cluster factors {3.5}	-5.08	-6.13	23.25
PEAKS037872	MEF2A	α-Helices exposed by beta-structures{5}	MADS box factors {5.1}	49.38	21.32	0
PEAKS037877	IRF8	Helix-turn-helix domains{3}	Tryptophan cluster factors {3.5}	12.76	7.42	6.35
PEAKS037879	IRF8	Helix-turn-helix domains{3}	Tryptophan cluster factors {3.5}	11.63	10.46	0
PEAKS037888	IKZF1	Zinc-coordinating DNA-binding domains{2}	C2H2 zinc finger factors {2.3}	14.95	11.68	7
PEAKS037919	IRF3	Helix-turn-helix domains{3}	Tryptophan cluster factors {3.5}	-79.96	-56.67	27.74
PEAKS037920	IRF3	Helix-turn-helix domains{3}	Tryptophan cluster factors {3.5}	-60.37	-48.96	9.48
PEAKS037924	IRF3	Helix-turn-helix domains{3}	Tryptophan cluster factors {3.5}	-16.45	-9.95	9.07
PEAKS037927	RELA	Immunoglobulin fold{6}	Rel homology region (RHR) factors {6.1}	25.3	8.86	0
PEAKS037928	RELA	Immunoglobulin fold{6}	Rel homology region (RHR) factors {6.1}	30.48	12.34	0
PEAKS037929	RELA	Immunoglobulin fold{6}	Rel homology region (RHR) factors {6.1}	23.42	7.91	0
PEAKS037930	RELA	Immunoglobulin fold{6}	Rel homology region (RHR) factors {6.1}	17.85	0	0
PEAKS037944	CTCF	Zinc-coordinating DNA-binding domains{2}	C2H2 zinc finger factors {2.3}	34.51	21.43	0
PEAKS037945	CTCF	Zinc-coordinating DNA-binding domains{2}	C2H2 zinc finger factors {2.3}	37.48	18.4	0
PEAKS037964	NEUROD2	Basic domains{1}	Basic helix-loop-helix factors (bHLH) {1.2}	40.47	24.75	11.15
PEAKS037965	NEUROD2	Basic domains{1}	Basic helix-loop-helix factors (bHLH) {1.2}	33.03	16.72	7.3
PEAKS038139	EBF1	Immunoglobulin fold{6}	Rel homology region (RHR) factors {6.1}	117.18	88.27	23.46
PEAKS038140	EBF1	Immunoglobulin fold{6}	Rel homology region (RHR) factors {6.1}	25.82	9.67	19.08
PEAKS038141	EBF1	Immunoglobulin fold{6}	Rel homology region (RHR) factors {6.1}	11.74	7.64	29.29
PEAKS038157	ASCL1	Basic domains{1}	Basic helix-loop-helix factors (bHLH) {1.2}	16.99	7.36	26.67
PEAKS038227	GFI1	Zinc-coordinating DNA-binding domains{2}	C2H2 zinc finger factors {2.3}	0	0	30.52
PEAKS038228	IRF8	Helix-turn-helix domains{3}	Tryptophan cluster factors {3.5}	5.45	0	30.19
PEAKS038233	ESR1	Zinc-coordinating DNA-binding domains{2}	Nuclear receptors with C4 zinc fingers {2.1}	17.13	8.63	39.62
PEAKS038234	FOXA2	Helix-turn-helix domains{3}	Fork head / winged helix factors {3.3}	27.09	15.03	37.6
PEAKS038238	STAT5A	Immunoglobulin fold{6}	STAT domain factors {6.2}	34.4	8.41	26.69
PEAKS038239	STAT5A	Immunoglobulin fold{6}	STAT domain factors {6.2}	18.8	0	36.49
PEAKS038306	CTCF	Zinc-coordinating DNA-binding domains{2}	C2H2 zinc finger factors {2.3}	28.2	15.06	44.27
PEAKS038307	CTCFL	Zinc-coordinating DNA-binding domains{2}	C2H2 zinc finger factors {2.3}	47.65	20.34	13.18
PEAKS038330	TP53	Immunoglobulin fold{6}	p53 domain factors {6.3}	16.96	12.88	12.16
PEAKS038344	KLF4	Zinc-coordinating DNA-binding domains{2}	C2H2 zinc finger factors {2.3}	34.31	23.48	9.06
PEAKS038345	CEBPA	Basic domains{1}	Basic leucine zipper factors (bZIP) {1.1}	28.8	13.29	15.68
PEAKS038347	SPI1	Helix-turn-helix domains{3}	Tryptophan cluster factors {3.5}	45.88	18.77	0
PEAKS038348	SPI1	Helix-turn-helix domains{3}	Tryptophan cluster factors {3.5}	38.83	19.9	5.67
PEAKS038427	BCL6	Zinc-coordinating DNA-binding domains{2}	C2H2 zinc finger factors {2.3}	18.05	12.51	6.46
PEAKS038479	SPI1	Helix-turn-helix domains{3}	Tryptophan cluster factors {3.5}	0	0	26.54
PEAKS038480	SPI1	Helix-turn-helix domains{3}	Tryptophan cluster factors {3.5}	15.4	10.15	60
PEAKS038481	FOS	Basic domains{1}	Basic leucine zipper factors (bZIP) {1.1}	18.81	8.31	15.23
PEAKS038482	FOS	Basic domains{1}	Basic leucine zipper factors (bZIP) {1.1}	31.73	22.01	0
PEAKS038484	FOS	Basic domains{1}	Basic leucine zipper factors (bZIP) {1.1}	21.42	14.84	0
PEAKS038489	RELA	Immunoglobulin fold{6}	Rel homology region (RHR) factors {6.1}	17.93	6.43	10.72
PEAKS038490	RELA	Immunoglobulin fold{6}	Rel homology region (RHR) factors {6.1}	30.83	18.47	0
PEAKS038491	RELA	Immunoglobulin fold{6}	Rel homology region (RHR) factors {6.1}	28.28	17.88	0
PEAKS038494	NFE2L2	Basic domains{1}	Basic leucine zipper factors (bZIP) {1.1}	27.4	18.64	-19
PEAKS038504	SOX9	Other all-alpha-helical DNA-binding domains{4}	High-mobility group (HMG) domain factors {4.1}	74.48	66.79	-7.11
PEAKS038512	JUN	Basic domains{1}	Basic leucine zipper factors (bZIP) {1.1}	20.78	9.49	11.24
PEAKS038525	YY1	Zinc-coordinating DNA-binding domains{2}	C2H2 zinc finger factors {2.3}	24.72	18.01	15.98
PEAKS038526	YY1	Zinc-coordinating DNA-binding domains{2}	C2H2 zinc finger factors {2.3}	33.8	24.06	29.02
PEAKS038527	YY1	Zinc-coordinating DNA-binding domains{2}	C2H2 zinc finger factors {2.3}	27.98	18.13	0
PEAKS038537	NR1D1	Zinc-coordinating DNA-binding domains{2}	Nuclear receptors with C4 zinc fingers {2.1}	13.8	7.56	0
PEAKS038626	NFE2L2	Basic domains{1}	Basic leucine zipper factors (bZIP) {1.1}	24.59	16.1	7.21
PEAKS038628	NFE2L2	Basic domains{1}	Basic leucine zipper factors (bZIP) {1.1}	29.76	18.86	5.73
PEAKS038649	SPI1	Helix-turn-helix domains{3}	Tryptophan cluster factors {3.5}	66.37	45.39	9.6
PEAKS038650	SPI1	Helix-turn-helix domains{3}	Tryptophan cluster factors {3.5}	71.62	45.59	8.39
PEAKS038651	SPI1	Helix-turn-helix domains{3}	Tryptophan cluster factors {3.5}	77.53	46.8	-47.19
PEAKS038652	MAFB	Basic domains{1}	Basic leucine zipper factors (bZIP) {1.1}	15.96	12.07	-50.88
PEAKS038653	MAFB	Basic domains{1}	Basic leucine zipper factors (bZIP) {1.1}	14.86	9.79	-13.08
PEAKS038844	RFX1	Helix-turn-helix domains{3}	Fork head / winged helix factors {3.3}	23.86	12.54	6.44
PEAKS038870	MAFG	Basic domains{1}	Basic leucine zipper factors (bZIP) {1.1}	7.92	5.14	0
PEAKS038871	MAFG	Basic domains{1}	Basic leucine zipper factors (bZIP) {1.1}	13.33	6.82	0
PEAKS038878	STAT5A	Immunoglobulin fold{6}	STAT domain factors {6.2}	26.62	12.7	0
PEAKS038881	STAT5A	Immunoglobulin fold{6}	STAT domain factors {6.2}	10	7	15.96
PEAKS038882	FOXA3	Helix-turn-helix domains{3}	Fork head / winged helix factors {3.3}	30.02	19.05	13.11
PEAKS038883	FOXA3	Helix-turn-helix domains{3}	Fork head / winged helix factors {3.3}	26.74	21.77	22.32
PEAKS038884	CEBPB	Basic domains{1}	Basic leucine zipper factors (bZIP) {1.1}	55.49	31.43	13.71
PEAKS038885	CEBPB	Basic domains{1}	Basic leucine zipper factors (bZIP) {1.1}	31.63	11.05	10.19
PEAKS038886	HNF4A	Zinc-coordinating DNA-binding domains{2}	Nuclear receptors with C4 zinc fingers {2.1}	28.54	17.23	0
PEAKS038887	HNF4A	Zinc-coordinating DNA-binding domains{2}	Nuclear receptors with C4 zinc fingers {2.1}	33.75	21.54	10.86
PEAKS038888	TCF3	Basic domains{1}	Basic helix-loop-helix factors (bHLH) {1.2}	25.17	13.48	13
PEAKS038889	TCF3	Basic domains{1}	Basic helix-loop-helix factors (bHLH) {1.2}	138.26	64.53	6.59
PEAKS038890	TCF3	Basic domains{1}	Basic helix-loop-helix factors (bHLH) {1.2}	21.52	14.52	5.07
PEAKS038891	TCF3	Basic domains{1}	Basic helix-loop-helix factors (bHLH) {1.2}	25.66	13.01	56.31
PEAKS038893	TCF3	Basic domains{1}	Basic helix-loop-helix factors (bHLH) {1.2}	22.19	6.29	50.75
PEAKS038895	TCF3	Basic domains{1}	Basic helix-loop-helix factors (bHLH) {1.2}	19.02	11.99	10.85
PEAKS038897	TCF3	Basic domains{1}	Basic helix-loop-helix factors (bHLH) {1.2}	89.35	66.18	5.67
PEAKS038915	IRF8	Helix-turn-helix domains{3}	Tryptophan cluster factors {3.5}	20.87	13.26	0
PEAKS038916	IRF8	Helix-turn-helix domains{3}	Tryptophan cluster factors {3.5}	21.54	15.62	6.84
PEAKS038917	IRF8	Helix-turn-helix domains{3}	Tryptophan cluster factors {3.5}	0	0	0
PEAKS038918	IRF1	Helix-turn-helix domains{3}	Tryptophan cluster factors {3.5}	13.81	6.54	0
PEAKS038919	IRF1	Helix-turn-helix domains{3}	Tryptophan cluster factors {3.5}	12.82	5.61	0
PEAKS038920	IRF1	Helix-turn-helix domains{3}	Tryptophan cluster factors {3.5}	-20.83	-16.03	9.28
PEAKS038921	SPI1	Helix-turn-helix domains{3}	Tryptophan cluster factors {3.5}	44.07	27.51	11.36
PEAKS038922	SPI1	Helix-turn-helix domains{3}	Tryptophan cluster factors {3.5}	36.99	29.92	0
PEAKS038923	SPI1	Helix-turn-helix domains{3}	Tryptophan cluster factors {3.5}	24.48	17.02	0
PEAKS038924	FOXF1	Helix-turn-helix domains{3}	Fork head / winged helix factors {3.3}	23.17	13.59	11.11
PEAKS038950	PBX1	Helix-turn-helix domains{3}	Homeo domain factors {3.1}	43.7	24.51	13.75
PEAKS038976	EBF1	Immunoglobulin fold{6}	Rel homology region (RHR) factors {6.1}	186.72	143.76	19.4
PEAKS038980	PBX1	Helix-turn-helix domains{3}	Homeo domain factors {3.1}	39.42	22.07	0
PEAKS038982	NR1D1	Zinc-coordinating DNA-binding domains{2}	Nuclear receptors with C4 zinc fingers {2.1}	7.86	0	18.29
PEAKS039020	RXRA	Zinc-coordinating DNA-binding domains{2}	Nuclear receptors with C4 zinc fingers {2.1}	12.94	8.87	0
PEAKS039022	CEBPB	Basic domains{1}	Basic leucine zipper factors (bZIP) {1.1}	28.54	9.46	16.66
PEAKS039029	RUNX2	Immunoglobulin fold{6}	Runt domain factors {6.4}	13.71	8.9	15.79
PEAKS039032	PPARG	Zinc-coordinating DNA-binding domains{2}	Nuclear receptors with C4 zinc fingers {2.1}	19.68	9.71	11.78
PEAKS039037	RUNX2	Immunoglobulin fold{6}	Runt domain factors {6.4}	23.71	15.93	0
PEAKS039038	CEBPB	Basic domains{1}	Basic leucine zipper factors (bZIP) {1.1}	151.76	105.29	6.18
PEAKS039041	RXRA	Zinc-coordinating DNA-binding domains{2}	Nuclear receptors with C4 zinc fingers {2.1}	27.6	16.53	0
PEAKS039042	RXRA	Zinc-coordinating DNA-binding domains{2}	Nuclear receptors with C4 zinc fingers {2.1}	28.78	18.35	14.06
PEAKS039043	RUNX2	Immunoglobulin fold{6}	Runt domain factors {6.4}	14.26	7.07	9.02
PEAKS039044	CEBPB	Basic domains{1}	Basic leucine zipper factors (bZIP) {1.1}	46.33	21.71	10.81
PEAKS039045	CEBPA	Basic domains{1}	Basic leucine zipper factors (bZIP) {1.1}	51.74	22.88	5.72
PEAKS039046	PPARG	Zinc-coordinating DNA-binding domains{2}	Nuclear receptors with C4 zinc fingers {2.1}	25.32	20.48	11.12
PEAKS039097	MYC	Basic domains{1}	Basic helix-loop-helix factors (bHLH) {1.2}	59.45	24.23	14.03
PEAKS039190	VSX2	Helix-turn-helix domains{3}	Homeo domain factors {3.1}	0	6.41	13.37
PEAKS039191	SOX2	Other all-alpha-helical DNA-binding domains{4}	High-mobility group (HMG) domain factors {4.1}	15.85	8	13.05
PEAKS039228	NKX2-1	Helix-turn-helix domains{3}	Homeo domain factors {3.1}	23.54	11.92	59.88
PEAKS039229	LHX6	Helix-turn-helix domains{3}	Homeo domain factors {3.1}	52.5	23.56	7.47
PEAKS039232	PTF1A	Basic domains{1}	Basic helix-loop-helix factors (bHLH) {1.2}	22.85	11.73	10.71
PEAKS039233	PTF1A	Basic domains{1}	Basic helix-loop-helix factors (bHLH) {1.2}	22.79	13.59	15.51
PEAKS039234	BHLHA15	Basic domains{1}	Basic helix-loop-helix factors (bHLH) {1.2}	9.38	11.82	20.59
PEAKS039235	BHLHA15	Basic domains{1}	Basic helix-loop-helix factors (bHLH) {1.2}	18.37	14.7	14.28
PEAKS039237	IKZF3	Zinc-coordinating DNA-binding domains{2}	C2H2 zinc finger factors {2.3}	19.54	10.95	6.26
PEAKS039238	TCF3	Basic domains{1}	Basic helix-loop-helix factors (bHLH) {1.2}	8	0	11.75
PEAKS039239	TCF3	Basic domains{1}	Basic helix-loop-helix factors (bHLH) {1.2}	11.02	14.89	13.24
PEAKS039240	EBF1	Immunoglobulin fold{6}	Rel homology region (RHR) factors {6.1}	125.56	82.71	39.92
PEAKS039241	EBF1	Immunoglobulin fold{6}	Rel homology region (RHR) factors {6.1}	122.84	76.25	42.98
PEAKS039243	ETS1	Helix-turn-helix domains{3}	Tryptophan cluster factors {3.5}	37.64	19.85	38.44
PEAKS039244	IKZF1	Zinc-coordinating DNA-binding domains{2}	C2H2 zinc finger factors {2.3}	18.3	15.5	8.36
PEAKS039245	IRF4	Helix-turn-helix domains{3}	Tryptophan cluster factors {3.5}	25.92	16.24	9.43
PEAKS039246	IRF4	Helix-turn-helix domains{3}	Tryptophan cluster factors {3.5}	30.33	17.33	7.43
PEAKS039247	LHX2	Helix-turn-helix domains{3}	Homeo domain factors {3.1}	58.75	42.26	11.39
PEAKS039248	PAX5	Helix-turn-helix domains{3}	Paired box factors {3.2}	24.85	11.47	0
PEAKS039249	PAX5	Helix-turn-helix domains{3}	Paired box factors {3.2}	16.84	7.4	0
PEAKS039250	TEAD1	Helix-turn-helix domains{3}	TEA domain factors {3.6}	30.65	16.14	10.43
PEAKS039254	SP9	Zinc-coordinating DNA-binding domains{2}	C2H2 zinc finger factors {2.3}	66.28	35.36	5.39
PEAKS039303	FOS	Basic domains{1}	Basic leucine zipper factors (bZIP) {1.1}	21.28	6.86	18
PEAKS039310	FOS	Basic domains{1}	Basic leucine zipper factors (bZIP) {1.1}	26.98	10.35	19.87
PEAKS039311	FOSB	Basic domains{1}	Basic leucine zipper factors (bZIP) {1.1}	11.16	0	17.17
PEAKS039312	JUNB	Basic domains{1}	Basic leucine zipper factors (bZIP) {1.1}	13.36	13.58	5.55
PEAKS039314	FOSB	Basic domains{1}	Basic leucine zipper factors (bZIP) {1.1}	26.23	8.25	12.66
PEAKS039317	FOS	Basic domains{1}	Basic leucine zipper factors (bZIP) {1.1}	8.42	0	12.02
PEAKS039318	FOSB	Basic domains{1}	Basic leucine zipper factors (bZIP) {1.1}	24.13	5.24	9.82
PEAKS039539	GATA4	Zinc-coordinating DNA-binding domains{2}	C4 zinc finger-type factors {2.2}	13.53	6.93	58.89
PEAKS039540	GATA4	Zinc-coordinating DNA-binding domains{2}	C4 zinc finger-type factors {2.2}	11.89	8.55	11.16
PEAKS039576	NEUROD1	Basic domains{1}	Basic helix-loop-helix factors (bHLH) {1.2}	30.53	16.87	9.64
PEAKS039651	GABPA	Helix-turn-helix domains{3}	Tryptophan cluster factors {3.5}	112.35	65.83	56.69
PEAKS039670	RXRA	Zinc-coordinating DNA-binding domains{2}	Nuclear receptors with C4 zinc fingers {2.1}	21.43	9.78	0
PEAKS039672	RXRA	Zinc-coordinating DNA-binding domains{2}	Nuclear receptors with C4 zinc fingers {2.1}	13.71	6.21	5.13
PEAKS039674	RXRA	Zinc-coordinating DNA-binding domains{2}	Nuclear receptors with C4 zinc fingers {2.1}	25.26	9.77	9.2
PEAKS039676	RXRA	Zinc-coordinating DNA-binding domains{2}	Nuclear receptors with C4 zinc fingers {2.1}	22.58	6.81	44.62
PEAKS039700	GATA6	Zinc-coordinating DNA-binding domains{2}	C4 zinc finger-type factors {2.2}	18.31	7.32	6.84
PEAKS039701	GATA6	Zinc-coordinating DNA-binding domains{2}	C4 zinc finger-type factors {2.2}	21.56	16.12	10.1
PEAKS039785	CEBPA	Basic domains{1}	Basic leucine zipper factors (bZIP) {1.1}	196.78	102.87	0
PEAKS039786	CEBPA	Basic domains{1}	Basic leucine zipper factors (bZIP) {1.1}	30.4	16.79	0
PEAKS039787	CEBPB	Basic domains{1}	Basic leucine zipper factors (bZIP) {1.1}	7.52	0	0
PEAKS039789	CEBPB	Basic domains{1}	Basic leucine zipper factors (bZIP) {1.1}	42.83	29.01	-14.36
PEAKS039790	CEBPB	Basic domains{1}	Basic leucine zipper factors (bZIP) {1.1}	186.11	169.43	24
PEAKS039791	EBF2	Immunoglobulin fold{6}	Rel homology region (RHR) factors {6.1}	134.66	110.63	26.95
PEAKS039792	EBF2	Immunoglobulin fold{6}	Rel homology region (RHR) factors {6.1}	12.52	5.33	13.37
PEAKS039793	EBF2	Immunoglobulin fold{6}	Rel homology region (RHR) factors {6.1}	21.13	7.78	8.46
PEAKS039794	EBF2	Immunoglobulin fold{6}	Rel homology region (RHR) factors {6.1}	191.54	99.84	12.35
PEAKS039798	PPARG	Zinc-coordinating DNA-binding domains{2}	Nuclear receptors with C4 zinc fingers {2.1}	27.11	15.66	99.95
PEAKS039799	CTCF	Zinc-coordinating DNA-binding domains{2}	C2H2 zinc finger factors {2.3}	22.03	12.57	12.72
PEAKS039800	CTCF	Zinc-coordinating DNA-binding domains{2}	C2H2 zinc finger factors {2.3}	22.08	10.13	0
PEAKS039801	CTCF	Zinc-coordinating DNA-binding domains{2}	C2H2 zinc finger factors {2.3}	20.58	11.79	7.59
PEAKS039852	CTCF	Zinc-coordinating DNA-binding domains{2}	C2H2 zinc finger factors {2.3}	34.75	21.71	79.05
PEAKS039853	RUNX2	Immunoglobulin fold{6}	Runt domain factors {6.4}	38.04	21.26	6.05
PEAKS039854	CTCF	Zinc-coordinating DNA-binding domains{2}	C2H2 zinc finger factors {2.3}	53.78	27.75	8.17
PEAKS039855	RUNX2	Immunoglobulin fold{6}	Runt domain factors {6.4}	31.95	19.61	0
PEAKS039856	CTCF	Zinc-coordinating DNA-binding domains{2}	C2H2 zinc finger factors {2.3}	38.77	20.89	7.29
PEAKS039857	RUNX2	Immunoglobulin fold{6}	Runt domain factors {6.4}	20.85	15.31	16.88
PEAKS039927	RELA	Immunoglobulin fold{6}	Rel homology region (RHR) factors {6.1}	33.35	18.16	28.45
PEAKS039928	RELA	Immunoglobulin fold{6}	Rel homology region (RHR) factors {6.1}	26.86	7.77	8.32
PEAKS039929	RELA	Immunoglobulin fold{6}	Rel homology region (RHR) factors {6.1}	21.5	11.48	5.99
PEAKS039930	RELA	Immunoglobulin fold{6}	Rel homology region (RHR) factors {6.1}	15.46	0	0
PEAKS039931	RELA	Immunoglobulin fold{6}	Rel homology region (RHR) factors {6.1}	39.05	21.25	15.29
PEAKS039932	RELA	Immunoglobulin fold{6}	Rel homology region (RHR) factors {6.1}	26.4	11.31	83.68
PEAKS039933	RELA	Immunoglobulin fold{6}	Rel homology region (RHR) factors {6.1}	13.23	6.15	5.39
PEAKS039934	RELA	Immunoglobulin fold{6}	Rel homology region (RHR) factors {6.1}	14.07	7.86	11.74
PEAKS039952	TP53	Immunoglobulin fold{6}	p53 domain factors {6.3}	17.68	18.87	14.14
PEAKS039961	TP53	Immunoglobulin fold{6}	p53 domain factors {6.3}	12.11	0	7.19
PEAKS039969	TP53	Immunoglobulin fold{6}	p53 domain factors {6.3}	22.21	27.17	14.25
PEAKS039970	TP53	Immunoglobulin fold{6}	p53 domain factors {6.3}	33.5	33.11	15.81
PEAKS039972	TP53	Immunoglobulin fold{6}	p53 domain factors {6.3}	35.57	46.59	13.55
PEAKS040010	ESRRA	Zinc-coordinating DNA-binding domains{2}	Nuclear receptors with C4 zinc fingers {2.1}	11.27	5.92	18.73
PEAKS040015	NR3C1	Zinc-coordinating DNA-binding domains{2}	Nuclear receptors with C4 zinc fingers {2.1}	8.65	0	5.54
PEAKS040016	NR3C1	Zinc-coordinating DNA-binding domains{2}	Nuclear receptors with C4 zinc fingers {2.1}	5.85	0	5.44
PEAKS040017	CEBPA	Basic domains{1}	Basic leucine zipper factors (bZIP) {1.1}	12.87	5.35	6.59
PEAKS040018	CEBPA	Basic domains{1}	Basic leucine zipper factors (bZIP) {1.1}	56.31	35.81	16.21
PEAKS040019	CEBPA	Basic domains{1}	Basic leucine zipper factors (bZIP) {1.1}	43.28	22.1	6.79
PEAKS040020	CREB1	Basic domains{1}	Basic leucine zipper factors (bZIP) {1.1}	67.62	26.03	10.1
PEAKS040021	CREB1	Basic domains{1}	Basic leucine zipper factors (bZIP) {1.1}	36.13	20	6.63
PEAKS040022	CREB1	Basic domains{1}	Basic leucine zipper factors (bZIP) {1.1}	57.33	22.95	15.08
PEAKS040028	MYBL1	Helix-turn-helix domains{3}	Tryptophan cluster factors {3.5}	0	0	7.19
PEAKS040097	ETS1	Helix-turn-helix domains{3}	Tryptophan cluster factors {3.5}	64.26	30.81	0
PEAKS040113	ESRRA	Zinc-coordinating DNA-binding domains{2}	Nuclear receptors with C4 zinc fingers {2.1}	28.77	17.21	69.8
PEAKS040140	CTCF	Zinc-coordinating DNA-binding domains{2}	C2H2 zinc finger factors {2.3}	35.53	22.53	56.83
PEAKS040193	BATF	Basic domains{1}	Basic leucine zipper factors (bZIP) {1.1}	29.26	12.79	16.65
PEAKS040195	IRF4	Helix-turn-helix domains{3}	Tryptophan cluster factors {3.5}	8.21	0	15.4
PEAKS040237	SREBF1	Basic domains{1}	Basic helix-loop-helix factors (bHLH) {1.2}	15.88	0	10.86
PEAKS040256	STAT3	Immunoglobulin fold{6}	STAT domain factors {6.2}	17.14	6.02	10.41
PEAKS040258	STAT3	Immunoglobulin fold{6}	STAT domain factors {6.2}	27.23	16.57	12.7
PEAKS040265	JUNB	Basic domains{1}	Basic leucine zipper factors (bZIP) {1.1}	25.74	13.43	40.29
PEAKS040266	JUNB	Basic domains{1}	Basic leucine zipper factors (bZIP) {1.1}	38.39	23.78	7.46
PEAKS040269	BATF	Basic domains{1}	Basic leucine zipper factors (bZIP) {1.1}	19.96	5.62	0
PEAKS040270	BATF	Basic domains{1}	Basic leucine zipper factors (bZIP) {1.1}	14.29	7.65	11.14
PEAKS040295	STAT1	Immunoglobulin fold{6}	STAT domain factors {6.2}	21.42	9.95	6.45
PEAKS040296	STAT6	Immunoglobulin fold{6}	STAT domain factors {6.2}	19.92	12.68	26.34
PEAKS040297	STAT6	Immunoglobulin fold{6}	STAT domain factors {6.2}	31.85	17.36	0
PEAKS040298	STAT1	Immunoglobulin fold{6}	STAT domain factors {6.2}	8.08	0	0
PEAKS040299	STAT1	Immunoglobulin fold{6}	STAT domain factors {6.2}	27.11	11.68	5.97
PEAKS040302	IRF1	Helix-turn-helix domains{3}	Tryptophan cluster factors {3.5}	-96.3	-73.1	8.23
PEAKS040303	IRF1	Helix-turn-helix domains{3}	Tryptophan cluster factors {3.5}	-78.14	-63.41	6.07
PEAKS040304	JUNB	Basic domains{1}	Basic leucine zipper factors (bZIP) {1.1}	26.74	13.6	0
PEAKS040306	JUNB	Basic domains{1}	Basic leucine zipper factors (bZIP) {1.1}	17.51	15.91	10.55
PEAKS040307	CEBPB	Basic domains{1}	Basic leucine zipper factors (bZIP) {1.1}	30.56	17.19	5.74
PEAKS040308	CEBPB	Basic domains{1}	Basic leucine zipper factors (bZIP) {1.1}	25.22	8.7	6.67
PEAKS040309	CEBPB	Basic domains{1}	Basic leucine zipper factors (bZIP) {1.1}	30.9	20.15	0
PEAKS040310	MYC	Basic domains{1}	Basic helix-loop-helix factors (bHLH) {1.2}	211.31	116.79	0
PEAKS040311	MYC	Basic domains{1}	Basic helix-loop-helix factors (bHLH) {1.2}	170.33	76.52	0
PEAKS040312	MYC	Basic domains{1}	Basic helix-loop-helix factors (bHLH) {1.2}	56.64	22.55	5.04
PEAKS040313	MYC	Basic domains{1}	Basic helix-loop-helix factors (bHLH) {1.2}	126.69	55.75	5.25
PEAKS040331	CTCF	Zinc-coordinating DNA-binding domains{2}	C2H2 zinc finger factors {2.3}	32.07	18.64	-22.97
PEAKS040337	CTCF	Zinc-coordinating DNA-binding domains{2}	C2H2 zinc finger factors {2.3}	46.81	22.56	23.09
PEAKS040338	CTCF	Zinc-coordinating DNA-binding domains{2}	C2H2 zinc finger factors {2.3}	48.15	24.96	42.42
PEAKS040339	CTCF	Zinc-coordinating DNA-binding domains{2}	C2H2 zinc finger factors {2.3}	39.74	28.68	9.63
PEAKS040340	CTCF	Zinc-coordinating DNA-binding domains{2}	C2H2 zinc finger factors {2.3}	26.82	0	0
PEAKS040341	CTCF	Zinc-coordinating DNA-binding domains{2}	C2H2 zinc finger factors {2.3}	44.66	24.67	7.06
PEAKS040342	CTCF	Zinc-coordinating DNA-binding domains{2}	C2H2 zinc finger factors {2.3}	36.91	22.52	0
PEAKS040348	MAFK	Basic domains{1}	Basic leucine zipper factors (bZIP) {1.1}	7.38	5.16	6.9
PEAKS040349	BACH2	Basic domains{1}	Basic leucine zipper factors (bZIP) {1.1}	16.26	7.37	0
PEAKS040350	SPI1	Helix-turn-helix domains{3}	Tryptophan cluster factors {3.5}	69.11	71.41	5.21
PEAKS040351	SPI1	Helix-turn-helix domains{3}	Tryptophan cluster factors {3.5}	14.89	10.26	13.04
PEAKS040358	EBF1	Immunoglobulin fold{6}	Rel homology region (RHR) factors {6.1}	150.18	120.42	6.4
PEAKS040359	EBF1	Immunoglobulin fold{6}	Rel homology region (RHR) factors {6.1}	26.88	13.02	14.68
PEAKS040400	FLI1	Helix-turn-helix domains{3}	Tryptophan cluster factors {3.5}	85.99	47.82	20.55
PEAKS040401	ELF1	Helix-turn-helix domains{3}	Tryptophan cluster factors {3.5}	65.69	35.92	11.55
PEAKS040402	ELF4	Helix-turn-helix domains{3}	Tryptophan cluster factors {3.5}	48.41	27.98	0
PEAKS040403	ELF4	Helix-turn-helix domains{3}	Tryptophan cluster factors {3.5}	65.19	34.84	16.92
PEAKS040404	ELF4	Helix-turn-helix domains{3}	Tryptophan cluster factors {3.5}	65.15	34.73	131.41
PEAKS040405	GABPA	Helix-turn-helix domains{3}	Tryptophan cluster factors {3.5}	99.18	52.58	69.64
PEAKS040406	GABPA	Helix-turn-helix domains{3}	Tryptophan cluster factors {3.5}	110.43	57.62	0
PEAKS040407	GABPA	Helix-turn-helix domains{3}	Tryptophan cluster factors {3.5}	95.92	44.21	0
PEAKS040408	SPI1	Helix-turn-helix domains{3}	Tryptophan cluster factors {3.5}	39.79	21.28	56.62
PEAKS040409	SPI1	Helix-turn-helix domains{3}	Tryptophan cluster factors {3.5}	65.53	40.57	10.53
PEAKS040412	CTCF	Zinc-coordinating DNA-binding domains{2}	C2H2 zinc finger factors {2.3}	16.29	12.97	9.33
PEAKS040413	CTCF	Zinc-coordinating DNA-binding domains{2}	C2H2 zinc finger factors {2.3}	28.82	18.7	9.93
PEAKS040414	CTCF	Zinc-coordinating DNA-binding domains{2}	C2H2 zinc finger factors {2.3}	25.91	15.41	5.27
PEAKS040453	SPI1	Helix-turn-helix domains{3}	Tryptophan cluster factors {3.5}	46.22	21.26	8.92
PEAKS040474	HNF4A	Zinc-coordinating DNA-binding domains{2}	Nuclear receptors with C4 zinc fingers {2.1}	32.34	21.29	12.6
PEAKS040475	HNF4A	Zinc-coordinating DNA-binding domains{2}	Nuclear receptors with C4 zinc fingers {2.1}	38.12	27.08	14.96
PEAKS040479	SPI1	Helix-turn-helix domains{3}	Tryptophan cluster factors {3.5}	32.36	18.19	13.88
PEAKS040511	HNF4A	Zinc-coordinating DNA-binding domains{2}	Nuclear receptors with C4 zinc fingers {2.1}	38.18	14.34	16.21
PEAKS040615	PPARG	Zinc-coordinating DNA-binding domains{2}	Nuclear receptors with C4 zinc fingers {2.1}	16.63	11.51	20.9
PEAKS040666	CTCF	Zinc-coordinating DNA-binding domains{2}	C2H2 zinc finger factors {2.3}	24.93	11.11	15.29
PEAKS040667	CTCF	Zinc-coordinating DNA-binding domains{2}	C2H2 zinc finger factors {2.3}	28.19	20.36	15.4
PEAKS040678	BHLHE41	Basic domains{1}	Basic helix-loop-helix factors (bHLH) {1.2}	186.68	99.88	5.11
PEAKS040779	IRF1	Helix-turn-helix domains{3}	Tryptophan cluster factors {3.5}	0	0	0
PEAKS040888	JUNB	Basic domains{1}	Basic leucine zipper factors (bZIP) {1.1}	20.64	11.17	9.19
PEAKS040889	JUNB	Basic domains{1}	Basic leucine zipper factors (bZIP) {1.1}	26.59	11.17	0
PEAKS040890	JUND	Basic domains{1}	Basic leucine zipper factors (bZIP) {1.1}	18.1	8.5	16.6
PEAKS040891	JUND	Basic domains{1}	Basic leucine zipper factors (bZIP) {1.1}	10.94	0	9.11
PEAKS040913	RUNX1	Immunoglobulin fold{6}	Runt domain factors {6.4}	22.95	13.52	0
PEAKS040940	CTCF	Zinc-coordinating DNA-binding domains{2}	C2H2 zinc finger factors {2.3}	31.01	18.46	0
PEAKS040941	CTCF	Zinc-coordinating DNA-binding domains{2}	C2H2 zinc finger factors {2.3}	28.56	20.06	25.25
PEAKS040942	CTCF	Zinc-coordinating DNA-binding domains{2}	C2H2 zinc finger factors {2.3}	30.45	20.11	6.93
PEAKS040943	CTCF	Zinc-coordinating DNA-binding domains{2}	C2H2 zinc finger factors {2.3}	30.12	17	16.67
PEAKS040944	CTCF	Zinc-coordinating DNA-binding domains{2}	C2H2 zinc finger factors {2.3}	22.6	12.82	5.16
PEAKS040945	CTCF	Zinc-coordinating DNA-binding domains{2}	C2H2 zinc finger factors {2.3}	35.78	22.61	27.6
PEAKS040946	CTCF	Zinc-coordinating DNA-binding domains{2}	C2H2 zinc finger factors {2.3}	27.82	11.85	48.35
PEAKS040947	CTCF	Zinc-coordinating DNA-binding domains{2}	C2H2 zinc finger factors {2.3}	40.19	23.3	132.45
PEAKS040958	CEBPB	Basic domains{1}	Basic leucine zipper factors (bZIP) {1.1}	37.09	19.05	0
PEAKS040959	CEBPB	Basic domains{1}	Basic leucine zipper factors (bZIP) {1.1}	48.55	33.74	0
PEAKS040960	CEBPB	Basic domains{1}	Basic leucine zipper factors (bZIP) {1.1}	115.28	92.16	0
PEAKS040963	CEBPD	Basic domains{1}	Basic leucine zipper factors (bZIP) {1.1}	44.24	27.03	7.32
PEAKS040964	CEBPD	Basic domains{1}	Basic leucine zipper factors (bZIP) {1.1}	25.21	11.49	25.31
PEAKS040968	FOS	Basic domains{1}	Basic leucine zipper factors (bZIP) {1.1}	31.11	17.15	0
PEAKS040969	FOS	Basic domains{1}	Basic leucine zipper factors (bZIP) {1.1}	23.26	11.55	97.66
PEAKS040970	FOS	Basic domains{1}	Basic leucine zipper factors (bZIP) {1.1}	40.34	23.89	22.26
PEAKS040971	FOS	Basic domains{1}	Basic leucine zipper factors (bZIP) {1.1}	27.58	15.15	13.16
PEAKS040972	FOS	Basic domains{1}	Basic leucine zipper factors (bZIP) {1.1}	17.54	8.32	21.87
PEAKS040973	JUNB	Basic domains{1}	Basic leucine zipper factors (bZIP) {1.1}	40.86	24.52	38.14
PEAKS040974	JUNB	Basic domains{1}	Basic leucine zipper factors (bZIP) {1.1}	20.23	19.66	25.52
PEAKS040975	JUNB	Basic domains{1}	Basic leucine zipper factors (bZIP) {1.1}	53.65	23.22	5.22
PEAKS040976	JUNB	Basic domains{1}	Basic leucine zipper factors (bZIP) {1.1}	37.04	26.22	40.57
PEAKS040981	JUND	Basic domains{1}	Basic leucine zipper factors (bZIP) {1.1}	21.83	12.28	5.25
PEAKS040983	ATF3	Basic domains{1}	Basic leucine zipper factors (bZIP) {1.1}	24.05	15.29	0
PEAKS040984	ATF3	Basic domains{1}	Basic leucine zipper factors (bZIP) {1.1}	9.93	7.68	0
PEAKS040985	ATF3	Basic domains{1}	Basic leucine zipper factors (bZIP) {1.1}	29.15	22.26	0
PEAKS040986	ATF3	Basic domains{1}	Basic leucine zipper factors (bZIP) {1.1}	24.72	13.05	25.92
PEAKS040987	ATF3	Basic domains{1}	Basic leucine zipper factors (bZIP) {1.1}	15.92	8.64	13.82
PEAKS040989	RELA	Immunoglobulin fold{6}	Rel homology region (RHR) factors {6.1}	30.61	16.14	21.68
PEAKS040990	RELA	Immunoglobulin fold{6}	Rel homology region (RHR) factors {6.1}	20.26	7.21	13.55
PEAKS040991	RELA	Immunoglobulin fold{6}	Rel homology region (RHR) factors {6.1}	22.22	8.76	15.39
PEAKS040992	RELA	Immunoglobulin fold{6}	Rel homology region (RHR) factors {6.1}	27.75	7.46	0
PEAKS040994	RELA	Immunoglobulin fold{6}	Rel homology region (RHR) factors {6.1}	42.55	10.93	7.39
PEAKS040995	RELA	Immunoglobulin fold{6}	Rel homology region (RHR) factors {6.1}	24.49	13.63	20.36
PEAKS040996	RELA	Immunoglobulin fold{6}	Rel homology region (RHR) factors {6.1}	22.97	6.37	11.86
PEAKS040997	RELA	Immunoglobulin fold{6}	Rel homology region (RHR) factors {6.1}	26.3	13.91	10.47
PEAKS040999	CREB1	Basic domains{1}	Basic leucine zipper factors (bZIP) {1.1}	192.32	127.77	15.38
PEAKS041000	CREB1	Basic domains{1}	Basic leucine zipper factors (bZIP) {1.1}	200.42	93.83	0
PEAKS041001	CREB1	Basic domains{1}	Basic leucine zipper factors (bZIP) {1.1}	206.37	103.77	0
PEAKS041002	CREB1	Basic domains{1}	Basic leucine zipper factors (bZIP) {1.1}	60.06	32.84	6.07
PEAKS041011	CEBPA	Basic domains{1}	Basic leucine zipper factors (bZIP) {1.1}	41.17	18.27	0
PEAKS041042	BATF	Basic domains{1}	Basic leucine zipper factors (bZIP) {1.1}	9.63	0	0
PEAKS041043	BATF	Basic domains{1}	Basic leucine zipper factors (bZIP) {1.1}	26.02	9.38	0
PEAKS041045	BATF	Basic domains{1}	Basic leucine zipper factors (bZIP) {1.1}	25.81	13.96	11.51
PEAKS041047	BATF	Basic domains{1}	Basic leucine zipper factors (bZIP) {1.1}	9.98	5.46	11.66
PEAKS041052	BATF	Basic domains{1}	Basic leucine zipper factors (bZIP) {1.1}	39.72	14.7	0
PEAKS041054	BATF	Basic domains{1}	Basic leucine zipper factors (bZIP) {1.1}	33.87	17.73	0
PEAKS041057	MAF	Basic domains{1}	Basic leucine zipper factors (bZIP) {1.1}	11.76	0	7.8
PEAKS041058	MAF	Basic domains{1}	Basic leucine zipper factors (bZIP) {1.1}	24.69	14.61	6.58
PEAKS041060	CTCF	Zinc-coordinating DNA-binding domains{2}	C2H2 zinc finger factors {2.3}	37.17	20.14	9.87
PEAKS041061	CTCF	Zinc-coordinating DNA-binding domains{2}	C2H2 zinc finger factors {2.3}	55.01	30.55	16.04
PEAKS041062	CTCF	Zinc-coordinating DNA-binding domains{2}	C2H2 zinc finger factors {2.3}	39.65	16.75	0
PEAKS041063	CTCF	Zinc-coordinating DNA-binding domains{2}	C2H2 zinc finger factors {2.3}	44.94	20.69	10.65
PEAKS041064	ETV6	Helix-turn-helix domains{3}	Tryptophan cluster factors {3.5}	74.77	36.1	0
PEAKS041065	ETV6	Helix-turn-helix domains{3}	Tryptophan cluster factors {3.5}	91.64	55.25	-62.36
PEAKS041066	FOSL2	Basic domains{1}	Basic leucine zipper factors (bZIP) {1.1}	37.95	11.08	-53.62
PEAKS041067	FOSL2	Basic domains{1}	Basic leucine zipper factors (bZIP) {1.1}	47.15	22.83	10.27
PEAKS041068	FOSL2	Basic domains{1}	Basic leucine zipper factors (bZIP) {1.1}	26.37	18.11	0
PEAKS041069	HIF1A	Basic domains{1}	Basic helix-loop-helix factors (bHLH) {1.2}	21.21	9.94	14.44
PEAKS041070	HIF1A	Basic domains{1}	Basic helix-loop-helix factors (bHLH) {1.2}	40.01	26.01	11.01
PEAKS041072	IRF4	Helix-turn-helix domains{3}	Tryptophan cluster factors {3.5}	12.31	8.02	6.73
PEAKS041091	RORC	Zinc-coordinating DNA-binding domains{2}	Nuclear receptors with C4 zinc fingers {2.1}	14.53	10.78	13.31
PEAKS041092	RORC	Zinc-coordinating DNA-binding domains{2}	Nuclear receptors with C4 zinc fingers {2.1}	12.51	7.2	102.26
PEAKS041094	STAT3	Immunoglobulin fold{6}	STAT domain factors {6.2}	16.39	7.36	44.24
PEAKS041095	STAT3	Immunoglobulin fold{6}	STAT domain factors {6.2}	13.27	5.79	19.99
PEAKS041096	STAT3	Immunoglobulin fold{6}	STAT domain factors {6.2}	9.09	0	38.66
PEAKS041100	STAT3	Immunoglobulin fold{6}	STAT domain factors {6.2}	16.27	10.59	33
PEAKS041101	STAT3	Immunoglobulin fold{6}	STAT domain factors {6.2}	13.84	9.4	11.69
PEAKS041116	MYC	Basic domains{1}	Basic helix-loop-helix factors (bHLH) {1.2}	41.03	16.67	17.62
PEAKS041198	CTCF	Zinc-coordinating DNA-binding domains{2}	C2H2 zinc finger factors {2.3}	26.93	18.38	17.91
PEAKS041243	CTCF	Zinc-coordinating DNA-binding domains{2}	C2H2 zinc finger factors {2.3}	31.42	20.57	21.3
PEAKS041379	CTCF	Zinc-coordinating DNA-binding domains{2}	C2H2 zinc finger factors {2.3}	31.67	23.31	15.63
PEAKS041389	CTCF	Zinc-coordinating DNA-binding domains{2}	C2H2 zinc finger factors {2.3}	26.06	15.09	19.32
PEAKS041458	CTCF	Zinc-coordinating DNA-binding domains{2}	C2H2 zinc finger factors {2.3}	32.19	22.61	0
PEAKS041577	CTCF	Zinc-coordinating DNA-binding domains{2}	C2H2 zinc finger factors {2.3}	32.87	24.28	16.35
PEAKS041630	CTCF	Zinc-coordinating DNA-binding domains{2}	C2H2 zinc finger factors {2.3}	20.3	11.76	17.18
PEAKS041724	CTCF	Zinc-coordinating DNA-binding domains{2}	C2H2 zinc finger factors {2.3}	37.6	29.26	0
PEAKS041833	GATA4	Zinc-coordinating DNA-binding domains{2}	C4 zinc finger-type factors {2.2}	13.66	7.92	7.25
PEAKS041853	CTCF	Zinc-coordinating DNA-binding domains{2}	C2H2 zinc finger factors {2.3}	37.4	20.64	66.41
PEAKS042179	IRF1	Helix-turn-helix domains{3}	Tryptophan cluster factors {3.5}	-6.49	-5.7	8.77
PEAKS042180	IRF1	Helix-turn-helix domains{3}	Tryptophan cluster factors {3.5}	-12.15	-10.96	97.41
PEAKS042181	IRF1	Helix-turn-helix domains{3}	Tryptophan cluster factors {3.5}	-134.87	-66.96	9.4
PEAKS042182	IRF1	Helix-turn-helix domains{3}	Tryptophan cluster factors {3.5}	-25.94	-7.2	33.47
PEAKS042189	TP53	Immunoglobulin fold{6}	p53 domain factors {6.3}	18.66	11.88	27.48
PEAKS042190	TP53	Immunoglobulin fold{6}	p53 domain factors {6.3}	27.85	10.45	14.65
PEAKS042200	STAT5B	Immunoglobulin fold{6}	STAT domain factors {6.2}	16.39	13.15	26.07
PEAKS042228	STAT3	Immunoglobulin fold{6}	STAT domain factors {6.2}	23.31	13.3	22.17
PEAKS042230	STAT5B	Immunoglobulin fold{6}	STAT domain factors {6.2}	24.37	11.69	36.47
PEAKS042231	STAT5B	Immunoglobulin fold{6}	STAT domain factors {6.2}	12.68	0	38.15
PEAKS042232	STAT5B	Immunoglobulin fold{6}	STAT domain factors {6.2}	34.15	13.39	30.94
PEAKS042233	STAT5B	Immunoglobulin fold{6}	STAT domain factors {6.2}	21.44	10.37	18.48
PEAKS042234	STAT5B	Immunoglobulin fold{6}	STAT domain factors {6.2}	27.03	11.05	29.89
PEAKS042251	MYC	Basic domains{1}	Basic helix-loop-helix factors (bHLH) {1.2}	189.49	94.85	9.99
PEAKS042252	MYC	Basic domains{1}	Basic helix-loop-helix factors (bHLH) {1.2}	35.05	12.36	16.3
PEAKS042253	MYC	Basic domains{1}	Basic helix-loop-helix factors (bHLH) {1.2}	128.41	100.2	12.68
PEAKS042291	OLIG2	Basic domains{1}	Basic helix-loop-helix factors (bHLH) {1.2}	90.14	52.95	19.7
PEAKS042375	NR1H2	Zinc-coordinating DNA-binding domains{2}	Nuclear receptors with C4 zinc fingers {2.1}	22.16	13.24	14.12
PEAKS042427	STAT4	Immunoglobulin fold{6}	STAT domain factors {6.2}	11.71	6.01	21.6
PEAKS042428	STAT4	Immunoglobulin fold{6}	STAT domain factors {6.2}	13.84	5.73	16.47
PEAKS042478	SPI1	Helix-turn-helix domains{3}	Tryptophan cluster factors {3.5}	0	0	20.56
PEAKS042479	SPI1	Helix-turn-helix domains{3}	Tryptophan cluster factors {3.5}	50.46	37.92	13.22
PEAKS042487	STAT6	Immunoglobulin fold{6}	STAT domain factors {6.2}	16.22	6.79	11.83
PEAKS042488	STAT6	Immunoglobulin fold{6}	STAT domain factors {6.2}	111.01	81.42	10.29
PEAKS042489	STAT6	Immunoglobulin fold{6}	STAT domain factors {6.2}	131.34	73.18	9.23
PEAKS042520	ZNF652	Zinc-coordinating DNA-binding domains{2}	C2H2 zinc finger factors {2.3}	116.5	76.36	12.3
PEAKS042521	ZNF652	Zinc-coordinating DNA-binding domains{2}	C2H2 zinc finger factors {2.3}	0	0	14.42
PEAKS042522	ZNF652	Zinc-coordinating DNA-binding domains{2}	C2H2 zinc finger factors {2.3}	31.09	19.73	11.29
PEAKS048309	CTCF	Zinc-coordinating DNA-binding domains{2}	C2H2 zinc finger factors {2.3}	31.14	24.77	5.6
PEAKS048427	SPI1	Helix-turn-helix domains{3}	Tryptophan cluster factors {3.5}	58.95	39.77	0
PEAKS048428	SPI1	Helix-turn-helix domains{3}	Tryptophan cluster factors {3.5}	55.24	37.05	73.14
PEAKS048563	ESRRG	Zinc-coordinating DNA-binding domains{2}	Nuclear receptors with C4 zinc fingers {2.1}	24.92	14.13	90.08
PEAKS048589	FOXA1	Helix-turn-helix domains{3}	Fork head / winged helix factors {3.3}	31.78	22.3	6.89
PEAKS048590	FOXA1	Helix-turn-helix domains{3}	Fork head / winged helix factors {3.3}	31.66	21.19	8.37
PEAKS048591	FOXA1	Helix-turn-helix domains{3}	Fork head / winged helix factors {3.3}	40.51	26.82	9.04
PEAKS048592	FOXA1	Helix-turn-helix domains{3}	Fork head / winged helix factors {3.3}	37.19	20.09	5.73
PEAKS048598	EBF1	Immunoglobulin fold{6}	Rel homology region (RHR) factors {6.1}	36.59	17.49	19.69
PEAKS048599	EBF1	Immunoglobulin fold{6}	Rel homology region (RHR) factors {6.1}	38.59	22.31	13.3
PEAKS048600	EBF1	Immunoglobulin fold{6}	Rel homology region (RHR) factors {6.1}	28.27	12.02	13.22
PEAKS048604	IRF3	Helix-turn-helix domains{3}	Tryptophan cluster factors {3.5}	31.35	17.23	10.95
PEAKS048605	IRF3	Helix-turn-helix domains{3}	Tryptophan cluster factors {3.5}	0	0	9.03
PEAKS048606	IRF3	Helix-turn-helix domains{3}	Tryptophan cluster factors {3.5}	47.39	29.35	12.92
PEAKS048608	IRF5	Helix-turn-helix domains{3}	Tryptophan cluster factors {3.5}	17.19	9.55	8.32
PEAKS048610	IRF8	Helix-turn-helix domains{3}	Tryptophan cluster factors {3.5}	11.91	0	12.95
PEAKS048611	IRF8	Helix-turn-helix domains{3}	Tryptophan cluster factors {3.5}	12.27	0	8.1
PEAKS048612	IRF8	Helix-turn-helix domains{3}	Tryptophan cluster factors {3.5}	0	0	12.85
PEAKS048613	IRF8	Helix-turn-helix domains{3}	Tryptophan cluster factors {3.5}	14.52	9.05	21.8
PEAKS048614	IRF8	Helix-turn-helix domains{3}	Tryptophan cluster factors {3.5}	0	13.66	60.2
PEAKS048615	IRF8	Helix-turn-helix domains{3}	Tryptophan cluster factors {3.5}	0	0	6.7
PEAKS048616	JUNB	Basic domains{1}	Basic leucine zipper factors (bZIP) {1.1}	11.72	0	54.51
PEAKS048617	JUNB	Basic domains{1}	Basic leucine zipper factors (bZIP) {1.1}	9.14	0	18.28
PEAKS048631	STAT1	Immunoglobulin fold{6}	STAT domain factors {6.2}	0	0	8.37
PEAKS048632	STAT1	Immunoglobulin fold{6}	STAT domain factors {6.2}	0	0	76.74
PEAKS048633	STAT1	Immunoglobulin fold{6}	STAT domain factors {6.2}	0	0	21.6
PEAKS048635	PAX5	Helix-turn-helix domains{3}	Paired box factors {3.2}	16.56	15.64	16.39
PEAKS048636	PAX5	Helix-turn-helix domains{3}	Paired box factors {3.2}	13.55	7.16	12.84
PEAKS048666	BCL11B	Zinc-coordinating DNA-binding domains{2}	C2H2 zinc finger factors {2.3}	26.21	14.96	20.57
PEAKS048667	GATA3	Zinc-coordinating DNA-binding domains{2}	C4 zinc finger-type factors {2.2}	0	0	16.92
PEAKS048675	NR3C1	Zinc-coordinating DNA-binding domains{2}	Nuclear receptors with C4 zinc fingers {2.1}	21.17	9.68	7.92
PEAKS048677	NR3C1	Zinc-coordinating DNA-binding domains{2}	Nuclear receptors with C4 zinc fingers {2.1}	17.72	6.44	7.27
PEAKS048680	RELA	Immunoglobulin fold{6}	Rel homology region (RHR) factors {6.1}	13.34	0	20.22
PEAKS048682	SPI1	Helix-turn-helix domains{3}	Tryptophan cluster factors {3.5}	66.16	46.2	17.38
PEAKS048683	SPI1	Helix-turn-helix domains{3}	Tryptophan cluster factors {3.5}	71.45	48.8	15.66
PEAKS048684	SPI1	Helix-turn-helix domains{3}	Tryptophan cluster factors {3.5}	74.81	52.35	25.4
PEAKS048714	CTCF	Zinc-coordinating DNA-binding domains{2}	C2H2 zinc finger factors {2.3}	34.05	19.57	16.43
PEAKS048715	CTCF	Zinc-coordinating DNA-binding domains{2}	C2H2 zinc finger factors {2.3}	28.65	9.53	18.46
PEAKS048768	CTCF	Zinc-coordinating DNA-binding domains{2}	C2H2 zinc finger factors {2.3}	37.03	21.49	20.73
PEAKS048769	CTCF	Zinc-coordinating DNA-binding domains{2}	C2H2 zinc finger factors {2.3}	27.97	18.79	18.35
PEAKS048772	NFE2L2	Basic domains{1}	Basic leucine zipper factors (bZIP) {1.1}	11.05	6.57	8.25
PEAKS048774	CTCF	Zinc-coordinating DNA-binding domains{2}	C2H2 zinc finger factors {2.3}	28.07	16.2	9.52
PEAKS049047	REST	Zinc-coordinating DNA-binding domains{2}	C2H2 zinc finger factors {2.3}	28.19	17.85	5.43
PEAKS049090	RUNX1	Immunoglobulin fold{6}	Runt domain factors {6.4}	16.57	12.21	17.1
PEAKS049091	RUNX1	Immunoglobulin fold{6}	Runt domain factors {6.4}	18.46	14	7.13
PEAKS049092	SPI1	Helix-turn-helix domains{3}	Tryptophan cluster factors {3.5}	64.88	42.14	0
PEAKS049093	SPI1	Helix-turn-helix domains{3}	Tryptophan cluster factors {3.5}	64.91	46.83	10.63
PEAKS049096	CEBPB	Basic domains{1}	Basic leucine zipper factors (bZIP) {1.1}	67.56	36.41	5.37
PEAKS049097	CEBPB	Basic domains{1}	Basic leucine zipper factors (bZIP) {1.1}	65.62	42.58	5.69
PEAKS049098	SPI1	Helix-turn-helix domains{3}	Tryptophan cluster factors {3.5}	51.3	29.03	0
PEAKS049099	SPI1	Helix-turn-helix domains{3}	Tryptophan cluster factors {3.5}	71.51	40.39	9.38
PEAKS049101	RELA	Immunoglobulin fold{6}	Rel homology region (RHR) factors {6.1}	11.32	0	6.63
PEAKS049104	CEBPB	Basic domains{1}	Basic leucine zipper factors (bZIP) {1.1}	227.88	145.67	7.67
PEAKS049105	SPI1	Helix-turn-helix domains{3}	Tryptophan cluster factors {3.5}	76.13	46.11	10.73
PEAKS049106	CEBPB	Basic domains{1}	Basic leucine zipper factors (bZIP) {1.1}	73.83	35.89	92.79
PEAKS049107	SPI1	Helix-turn-helix domains{3}	Tryptophan cluster factors {3.5}	73.18	44.98	84.51
PEAKS049108	RELA	Immunoglobulin fold{6}	Rel homology region (RHR) factors {6.1}	10.42	0	76.64
PEAKS049109	JUN	Basic domains{1}	Basic leucine zipper factors (bZIP) {1.1}	26.62	12.86	23.83
PEAKS049110	RELA	Immunoglobulin fold{6}	Rel homology region (RHR) factors {6.1}	24.69	10.84	15.06
PEAKS049111	JUN	Basic domains{1}	Basic leucine zipper factors (bZIP) {1.1}	34.9	14.73	0
PEAKS049113	SPI1	Helix-turn-helix domains{3}	Tryptophan cluster factors {3.5}	57.48	30.78	6.97
PEAKS049114	CEBPB	Basic domains{1}	Basic leucine zipper factors (bZIP) {1.1}	39.09	22.68	12.58
PEAKS049115	SPI1	Helix-turn-helix domains{3}	Tryptophan cluster factors {3.5}	57.15	34.04	9.88
PEAKS049116	JUN	Basic domains{1}	Basic leucine zipper factors (bZIP) {1.1}	20.95	12.62	0
PEAKS049117	RELA	Immunoglobulin fold{6}	Rel homology region (RHR) factors {6.1}	21.25	12.76	0
PEAKS049118	JUN	Basic domains{1}	Basic leucine zipper factors (bZIP) {1.1}	29.36	16.73	5.44
PEAKS049119	RELA	Immunoglobulin fold{6}	Rel homology region (RHR) factors {6.1}	30.43	7.19	0
PEAKS049120	SPI1	Helix-turn-helix domains{3}	Tryptophan cluster factors {3.5}	58.45	33.25	0
PEAKS049121	SPI1	Helix-turn-helix domains{3}	Tryptophan cluster factors {3.5}	35.45	22.45	13.07
PEAKS049122	CEBPB	Basic domains{1}	Basic leucine zipper factors (bZIP) {1.1}	47.21	30.43	11.94
PEAKS049123	SPI1	Helix-turn-helix domains{3}	Tryptophan cluster factors {3.5}	67.31	42.17	13.21
PEAKS049124	CEBPB	Basic domains{1}	Basic leucine zipper factors (bZIP) {1.1}	43.24	26.93	0
PEAKS049125	SPI1	Helix-turn-helix domains{3}	Tryptophan cluster factors {3.5}	35.09	19.56	10.37
PEAKS049126	USF2	Basic domains{1}	Basic helix-loop-helix factors (bHLH) {1.2}	30.66	18.28	11.81
PEAKS049127	USF2	Basic domains{1}	Basic helix-loop-helix factors (bHLH) {1.2}	52.76	24.13	24.01
PEAKS049128	JUN	Basic domains{1}	Basic leucine zipper factors (bZIP) {1.1}	24.57	14.65	17.21
PEAKS049129	JUN	Basic domains{1}	Basic leucine zipper factors (bZIP) {1.1}	15.1	6.86	16.3
PEAKS049130	RELA	Immunoglobulin fold{6}	Rel homology region (RHR) factors {6.1}	19.92	6.58	25.09
PEAKS049132	CEBPB	Basic domains{1}	Basic leucine zipper factors (bZIP) {1.1}	39.05	22.48	34.21
PEAKS049133	CEBPB	Basic domains{1}	Basic leucine zipper factors (bZIP) {1.1}	40.69	30.02	8.41
PEAKS049134	JUN	Basic domains{1}	Basic leucine zipper factors (bZIP) {1.1}	27.39	10.73	19
PEAKS049136	SPI1	Helix-turn-helix domains{3}	Tryptophan cluster factors {3.5}	55.49	39.99	16.25
PEAKS049137	SPI1	Helix-turn-helix domains{3}	Tryptophan cluster factors {3.5}	57.14	38.95	8.09
PEAKS049138	RELA	Immunoglobulin fold{6}	Rel homology region (RHR) factors {6.1}	22.74	9.67	19.41
PEAKS049139	JUN	Basic domains{1}	Basic leucine zipper factors (bZIP) {1.1}	20.76	13.83	0
PEAKS049203	PAX5	Helix-turn-helix domains{3}	Paired box factors {3.2}	22.21	10.63	0
PEAKS049363	SPI1	Helix-turn-helix domains{3}	Tryptophan cluster factors {3.5}	76.05	51.65	5.42
PEAKS049364	SPI1	Helix-turn-helix domains{3}	Tryptophan cluster factors {3.5}	73.53	44.79	0
PEAKS049377	CTCF	Zinc-coordinating DNA-binding domains{2}	C2H2 zinc finger factors {2.3}	40.03	15.78	0
PEAKS049408	PTF1A	Basic domains{1}	Basic helix-loop-helix factors (bHLH) {1.2}	26.63	13.03	0
PEAKS049409	MYC	Basic domains{1}	Basic helix-loop-helix factors (bHLH) {1.2}	117.58	74.17	5.53
PEAKS049421	BCL11B	Zinc-coordinating DNA-binding domains{2}	C2H2 zinc finger factors {2.3}	33.79	19.5	5.98
PEAKS049422	BCL11B	Zinc-coordinating DNA-binding domains{2}	C2H2 zinc finger factors {2.3}	48.36	26.57	0
PEAKS049423	BCL11B	Zinc-coordinating DNA-binding domains{2}	C2H2 zinc finger factors {2.3}	23.56	17.5	6.07
PEAKS049508	MYC	Basic domains{1}	Basic helix-loop-helix factors (bHLH) {1.2}	101.5	54.29	10.29
PEAKS049524	SOX2	Other all-alpha-helical DNA-binding domains{4}	High-mobility group (HMG) domain factors {4.1}	19.9	9.37	13.97
PEAKS049570	FOS	Basic domains{1}	Basic leucine zipper factors (bZIP) {1.1}	53.34	21.18	12.74
PEAKS049571	FOS	Basic domains{1}	Basic leucine zipper factors (bZIP) {1.1}	21.01	15.58	16.28
PEAKS049574	FOSL2	Basic domains{1}	Basic leucine zipper factors (bZIP) {1.1}	41.42	20.39	11.38
PEAKS049575	FOSL2	Basic domains{1}	Basic leucine zipper factors (bZIP) {1.1}	36.1	18.91	16.51
PEAKS049576	FOSL2	Basic domains{1}	Basic leucine zipper factors (bZIP) {1.1}	48.35	20.14	10.55
PEAKS049577	FOSL2	Basic domains{1}	Basic leucine zipper factors (bZIP) {1.1}	51.57	31.5	15.67
PEAKS049578	JUND	Basic domains{1}	Basic leucine zipper factors (bZIP) {1.1}	36.65	18.36	7.02
PEAKS049579	JUND	Basic domains{1}	Basic leucine zipper factors (bZIP) {1.1}	37.43	21.2	19.2
PEAKS049580	JUND	Basic domains{1}	Basic leucine zipper factors (bZIP) {1.1}	30.88	18.37	8
PEAKS049581	JUND	Basic domains{1}	Basic leucine zipper factors (bZIP) {1.1}	43.89	18.83	15.94
PEAKS049582	FOS	Basic domains{1}	Basic leucine zipper factors (bZIP) {1.1}	40.26	17.27	6.47
PEAKS049583	FOS	Basic domains{1}	Basic leucine zipper factors (bZIP) {1.1}	53.72	33.28	0
PEAKS049585	JUND	Basic domains{1}	Basic leucine zipper factors (bZIP) {1.1}	23.25	10.81	-6.49
PEAKS049586	JUND	Basic domains{1}	Basic leucine zipper factors (bZIP) {1.1}	32.46	23.13	-62.38
PEAKS049587	JUND	Basic domains{1}	Basic leucine zipper factors (bZIP) {1.1}	40.92	11.29	0
PEAKS049613	TCF3	Basic domains{1}	Basic helix-loop-helix factors (bHLH) {1.2}	32.54	14.74	11.38
PEAKS049614	TCF3	Basic domains{1}	Basic helix-loop-helix factors (bHLH) {1.2}	96.65	52.51	10.06
PEAKS049616	HOXD11	Helix-turn-helix domains{3}	Homeo domain factors {3.1}	37.21	22.82	0
PEAKS049619	CTCF	Zinc-coordinating DNA-binding domains{2}	C2H2 zinc finger factors {2.3}	37.36	18.8	18.77
PEAKS049620	CTCF	Zinc-coordinating DNA-binding domains{2}	C2H2 zinc finger factors {2.3}	48.36	23.53	9.35
PEAKS049625	WT1	Zinc-coordinating DNA-binding domains{2}	C2H2 zinc finger factors {2.3}	39.25	16.49	11.53
PEAKS049635	CTCF	Zinc-coordinating DNA-binding domains{2}	C2H2 zinc finger factors {2.3}	28.85	16.76	7.93
PEAKS049636	CTCF	Zinc-coordinating DNA-binding domains{2}	C2H2 zinc finger factors {2.3}	33.2	17.47	0
PEAKS049637	CTCF	Zinc-coordinating DNA-binding domains{2}	C2H2 zinc finger factors {2.3}	34.23	22.44	10.52
PEAKS049638	CTCF	Zinc-coordinating DNA-binding domains{2}	C2H2 zinc finger factors {2.3}	34.04	24.5	0
PEAKS049648	PRDM1	Zinc-coordinating DNA-binding domains{2}	C2H2 zinc finger factors {2.3}	-42.39	-32.9	6.59
PEAKS049655	PDX1	Helix-turn-helix domains{3}	Homeo domain factors {3.1}	0	0	65.91
PEAKS049676	GRHL2	Immunoglobulin fold{6}	Grainyhead domain factors {6.7}	8.43	0	9.99
PEAKS049680	GRHL2	Immunoglobulin fold{6}	Grainyhead domain factors {6.7}	5.4	0	55.39
PEAKS049705	LHX2	Helix-turn-helix domains{3}	Homeo domain factors {3.1}	55.22	23.07	42.6
PEAKS049706	LHX2	Helix-turn-helix domains{3}	Homeo domain factors {3.1}	41.22	27.33	9.12
PEAKS049707	EBF1	Immunoglobulin fold{6}	Rel homology region (RHR) factors {6.1}	40.3	17.57	5.6
PEAKS049708	EBF1	Immunoglobulin fold{6}	Rel homology region (RHR) factors {6.1}	207.8	105.36	0
PEAKS049709	EBF1	Immunoglobulin fold{6}	Rel homology region (RHR) factors {6.1}	28.73	9.97	0
PEAKS049711	EBF1	Immunoglobulin fold{6}	Rel homology region (RHR) factors {6.1}	18.22	6.23	28.04
PEAKS049728	SPI1	Helix-turn-helix domains{3}	Tryptophan cluster factors {3.5}	38.88	26.99	6.53
PEAKS049729	SPI1	Helix-turn-helix domains{3}	Tryptophan cluster factors {3.5}	37.65	25.36	56.91
PEAKS049793	RELA	Immunoglobulin fold{6}	Rel homology region (RHR) factors {6.1}	18.62	8.4	58.97
PEAKS049794	RELA	Immunoglobulin fold{6}	Rel homology region (RHR) factors {6.1}	20.42	9.17	5.29
PEAKS049795	RELA	Immunoglobulin fold{6}	Rel homology region (RHR) factors {6.1}	18.76	7.13	9.78
PEAKS049796	RELA	Immunoglobulin fold{6}	Rel homology region (RHR) factors {6.1}	12.39	5.47	66.53
PEAKS049802	RELA	Immunoglobulin fold{6}	Rel homology region (RHR) factors {6.1}	18.54	8.76	29.44
PEAKS049816	CTCF	Zinc-coordinating DNA-binding domains{2}	C2H2 zinc finger factors {2.3}	51.27	27.89	24.96
PEAKS049828	CTCF	Zinc-coordinating DNA-binding domains{2}	C2H2 zinc finger factors {2.3}	42.43	18.8	10.79
PEAKS049829	CTCF	Zinc-coordinating DNA-binding domains{2}	C2H2 zinc finger factors {2.3}	30.13	14.77	8.91
PEAKS049830	RELA	Immunoglobulin fold{6}	Rel homology region (RHR) factors {6.1}	22.81	9.93	8.9
PEAKS049831	CEBPB	Basic domains{1}	Basic leucine zipper factors (bZIP) {1.1}	43.99	24.58	17.96
PEAKS049832	JUN	Basic domains{1}	Basic leucine zipper factors (bZIP) {1.1}	0	0	15.21
PEAKS049839	STAT3	Immunoglobulin fold{6}	STAT domain factors {6.2}	21.77	13.22	20.09
PEAKS050010	HNF4A	Zinc-coordinating DNA-binding domains{2}	Nuclear receptors with C4 zinc fingers {2.1}	39.56	18.74	13.82
PEAKS050011	HNF4A	Zinc-coordinating DNA-binding domains{2}	Nuclear receptors with C4 zinc fingers {2.1}	34.17	17.62	12.95
PEAKS050012	HNF4A	Zinc-coordinating DNA-binding domains{2}	Nuclear receptors with C4 zinc fingers {2.1}	36.27	21.14	14.72
PEAKS050013	HNF4A	Zinc-coordinating DNA-binding domains{2}	Nuclear receptors with C4 zinc fingers {2.1}	51.21	18.86	10.53
PEAKS050658	RELA	Immunoglobulin fold{6}	Rel homology region (RHR) factors {6.1}	25.19	13.96	15.87
PEAKS050661	ARNTL	Basic domains{1}	Basic helix-loop-helix factors (bHLH) {1.2}	119.84	81.82	11.85
PEAKS050663	ARNTL	Basic domains{1}	Basic helix-loop-helix factors (bHLH) {1.2}	123.9	55.83	11.61
PEAKS050665	CLOCK	Basic domains{1}	Basic helix-loop-helix factors (bHLH) {1.2}	156.41	74.07	0
PEAKS050666	CLOCK	Basic domains{1}	Basic helix-loop-helix factors (bHLH) {1.2}	156.11	95.91	21.67
PEAKS050667	CLOCK	Basic domains{1}	Basic helix-loop-helix factors (bHLH) {1.2}	133.11	71.26	0
PEAKS050668	CLOCK	Basic domains{1}	Basic helix-loop-helix factors (bHLH) {1.2}	139.8	66.05	0
PEAKS050675	CLOCK	Basic domains{1}	Basic helix-loop-helix factors (bHLH) {1.2}	141	65.9	0
PEAKS050676	ARNTL	Basic domains{1}	Basic helix-loop-helix factors (bHLH) {1.2}	24.2	14.65	6.87
PEAKS050677	CLOCK	Basic domains{1}	Basic helix-loop-helix factors (bHLH) {1.2}	127.32	54.73	8.82
PEAKS050678	ARNTL	Basic domains{1}	Basic helix-loop-helix factors (bHLH) {1.2}	120.35	84.46	0
PEAKS050679	CLOCK	Basic domains{1}	Basic helix-loop-helix factors (bHLH) {1.2}	148.17	64.5	0
PEAKS050680	ARNTL	Basic domains{1}	Basic helix-loop-helix factors (bHLH) {1.2}	28.99	14.08	0
PEAKS050685	NR3C1	Zinc-coordinating DNA-binding domains{2}	Nuclear receptors with C4 zinc fingers {2.1}	24.39	6.1	0
PEAKS050687	FOXO1	Helix-turn-helix domains{3}	Fork head / winged helix factors {3.3}	12.54	7.26	23.62
PEAKS050693	AR	Zinc-coordinating DNA-binding domains{2}	Nuclear receptors with C4 zinc fingers {2.1}	38.11	16.73	0
PEAKS050694	AR	Zinc-coordinating DNA-binding domains{2}	Nuclear receptors with C4 zinc fingers {2.1}	35.7	18.43	0
PEAKS050707	NFE2L2	Basic domains{1}	Basic leucine zipper factors (bZIP) {1.1}	188.65	134.92	0
PEAKS050708	NFE2L2	Basic domains{1}	Basic leucine zipper factors (bZIP) {1.1}	11.56	7.72	13.3
PEAKS050752	VDR	Zinc-coordinating DNA-binding domains{2}	Nuclear receptors with C4 zinc fingers {2.1}	0	0	0
PEAKS050755	RELA	Immunoglobulin fold{6}	Rel homology region (RHR) factors {6.1}	17.86	0	9.24
PEAKS052297	CTCF	Zinc-coordinating DNA-binding domains{2}	C2H2 zinc finger factors {2.3}	25.79	11.42	0
PEAKS052604	CTCF	Zinc-coordinating DNA-binding domains{2}	C2H2 zinc finger factors {2.3}	43.41	17.63	6.87
PEAKS054477	CTCF	Zinc-coordinating DNA-binding domains{2}	C2H2 zinc finger factors {2.3}	40.53	19.08	35.61
PEAKS054478	CTCF	Zinc-coordinating DNA-binding domains{2}	C2H2 zinc finger factors {2.3}	39.98	18.76	14.06
PEAKS054796	CTCF	Zinc-coordinating DNA-binding domains{2}	C2H2 zinc finger factors {2.3}	32.87	16.08	7.79
PEAKS054797	CTCF	Zinc-coordinating DNA-binding domains{2}	C2H2 zinc finger factors {2.3}	33	18.53	13.33
PEAKS054843	FOXA1	Helix-turn-helix domains{3}	Fork head / winged helix factors {3.3}	31.73	19.7	11.09
PEAKS054850	ATF3	Basic domains{1}	Basic leucine zipper factors (bZIP) {1.1}	25.28	14.07	5.12
PEAKS054851	ATF3	Basic domains{1}	Basic leucine zipper factors (bZIP) {1.1}	21.42	11.26	6.11
PEAKS054852	CEBPA	Basic domains{1}	Basic leucine zipper factors (bZIP) {1.1}	217.91	152.45	9.83
PEAKS054853	CEBPA	Basic domains{1}	Basic leucine zipper factors (bZIP) {1.1}	21.32	13.3	11.6
PEAKS054854	JUN	Basic domains{1}	Basic leucine zipper factors (bZIP) {1.1}	29.4	16.84	12.32
PEAKS054855	JUN	Basic domains{1}	Basic leucine zipper factors (bZIP) {1.1}	28.67	20.88	14.85
PEAKS054856	FOS	Basic domains{1}	Basic leucine zipper factors (bZIP) {1.1}	24.6	12.1	12.48
PEAKS054858	FOSL2	Basic domains{1}	Basic leucine zipper factors (bZIP) {1.1}	14.05	0	14.59
PEAKS054860	JUNB	Basic domains{1}	Basic leucine zipper factors (bZIP) {1.1}	13.69	6.94	6.63
PEAKS054862	JUND	Basic domains{1}	Basic leucine zipper factors (bZIP) {1.1}	24.98	12.44	11.61
PEAKS054863	JUND	Basic domains{1}	Basic leucine zipper factors (bZIP) {1.1}	29.86	13.56	31.97
PEAKS054864	SPI1	Helix-turn-helix domains{3}	Tryptophan cluster factors {3.5}	54.15	37.6	38.55
PEAKS054865	SPI1	Helix-turn-helix domains{3}	Tryptophan cluster factors {3.5}	73.18	41.63	27.49
PEAKS054866	ATF3	Basic domains{1}	Basic leucine zipper factors (bZIP) {1.1}	32.42	12.56	38.44
PEAKS054867	ATF3	Basic domains{1}	Basic leucine zipper factors (bZIP) {1.1}	23.76	7.49	21.9
PEAKS054868	JUN	Basic domains{1}	Basic leucine zipper factors (bZIP) {1.1}	30.08	17.47	30.61
PEAKS054869	JUN	Basic domains{1}	Basic leucine zipper factors (bZIP) {1.1}	24.48	12.4	0
PEAKS054870	FOS	Basic domains{1}	Basic leucine zipper factors (bZIP) {1.1}	44.71	10.11	9.71
PEAKS054871	FOS	Basic domains{1}	Basic leucine zipper factors (bZIP) {1.1}	39.05	28.92	23.7
PEAKS054872	JUNB	Basic domains{1}	Basic leucine zipper factors (bZIP) {1.1}	33.21	15.87	99.38
PEAKS054874	JUND	Basic domains{1}	Basic leucine zipper factors (bZIP) {1.1}	25.06	13.78	32.68
PEAKS054875	JUND	Basic domains{1}	Basic leucine zipper factors (bZIP) {1.1}	38.39	15.48	25.73
PEAKS054995	LEF1	Other all-alpha-helical DNA-binding domains{4}	High-mobility group (HMG) domain factors {4.1}	25.41	17.87	35.07
PEAKS055017	BCL6	Zinc-coordinating DNA-binding domains{2}	C2H2 zinc finger factors {2.3}	21.59	17.41	0
PEAKS055018	BCL6	Zinc-coordinating DNA-binding domains{2}	C2H2 zinc finger factors {2.3}	14.13	6.77	6.89
PEAKS055019	BCL6	Zinc-coordinating DNA-binding domains{2}	C2H2 zinc finger factors {2.3}	13.04	7.28	0
PEAKS055020	BCL6	Zinc-coordinating DNA-binding domains{2}	C2H2 zinc finger factors {2.3}	8.67	7.14	13.53
PEAKS055021	BCL6	Zinc-coordinating DNA-binding domains{2}	C2H2 zinc finger factors {2.3}	9.77	9.1	11.34
PEAKS055022	BCL6	Zinc-coordinating DNA-binding domains{2}	C2H2 zinc finger factors {2.3}	23.85	13.34	24.83
PEAKS055027	PPARD	Zinc-coordinating DNA-binding domains{2}	Nuclear receptors with C4 zinc fingers {2.1}	28.06	12.74	15.33
PEAKS055028	PPARD	Zinc-coordinating DNA-binding domains{2}	Nuclear receptors with C4 zinc fingers {2.1}	20.02	14.54	22.12
PEAKS055083	MEF2C	α-Helices exposed by beta-structures{5}	MADS box factors {5.1}	14.47	0	7.54
PEAKS055154	TWIST2	Basic domains{1}	Basic helix-loop-helix factors (bHLH) {1.2}	11.64	6.07	8.95
PEAKS055156	MYOD1	Basic domains{1}	Basic helix-loop-helix factors (bHLH) {1.2}	26.66	9.3	10.59
PEAKS055157	MYOD1	Basic domains{1}	Basic helix-loop-helix factors (bHLH) {1.2}	55.97	18.55	5.48
PEAKS055158	TWIST2	Basic domains{1}	Basic helix-loop-helix factors (bHLH) {1.2}	26.47	12.81	23.8
PEAKS055159	MYOD1	Basic domains{1}	Basic helix-loop-helix factors (bHLH) {1.2}	25.14	11.97	15.28
PEAKS055160	TWIST2	Basic domains{1}	Basic helix-loop-helix factors (bHLH) {1.2}	23.96	9.83	19.54
PEAKS055161	MYOD1	Basic domains{1}	Basic helix-loop-helix factors (bHLH) {1.2}	32.37	11.29	31.59
PEAKS055166	IRF8	Helix-turn-helix domains{3}	Tryptophan cluster factors {3.5}	0	0	17.16
PEAKS055167	SPI1	Helix-turn-helix domains{3}	Tryptophan cluster factors {3.5}	27.92	18.31	15.89
PEAKS055351	ARNT2	Basic domains{1}	Basic helix-loop-helix factors (bHLH) {1.2}	29.38	17.64	12.02
PEAKS055352	ARNT2	Basic domains{1}	Basic helix-loop-helix factors (bHLH) {1.2}	33.98	21.44	20.82
PEAKS055622	BHLHE40	Basic domains{1}	Basic helix-loop-helix factors (bHLH) {1.2}	293.01	157.43	7.27
PEAKS055623	BHLHE40	Basic domains{1}	Basic helix-loop-helix factors (bHLH) {1.2}	107.97	63.97	6.83
PEAKS055636	CTCF	Zinc-coordinating DNA-binding domains{2}	C2H2 zinc finger factors {2.3}	25.98	13.71	0
PEAKS055637	CTCF	Zinc-coordinating DNA-binding domains{2}	C2H2 zinc finger factors {2.3}	24.41	15.21	18.34
PEAKS055998	CREB1	Basic domains{1}	Basic leucine zipper factors (bZIP) {1.1}	46.38	20.54	22.69
PEAKS055999	CREB1	Basic domains{1}	Basic leucine zipper factors (bZIP) {1.1}	183.15	133.78	0
PEAKS057110	STAT2	Immunoglobulin fold{6}	STAT domain factors {6.2}	14.08	7.81	8.97
PEAKS057173	SOX4	Other all-alpha-helical DNA-binding domains{4}	High-mobility group (HMG) domain factors {4.1}	22.54	13.86	10.79
PEAKS057174	SOX11	Other all-alpha-helical DNA-binding domains{4}	High-mobility group (HMG) domain factors {4.1}	25.09	12.41	9.31
PEAKS057208	RXRA	Zinc-coordinating DNA-binding domains{2}	Nuclear receptors with C4 zinc fingers {2.1}	32.8	16.4	21.79
PEAKS057209	RXRA	Zinc-coordinating DNA-binding domains{2}	Nuclear receptors with C4 zinc fingers {2.1}	26.26	19.11	13.31
PEAKS057210	CEBPA	Basic domains{1}	Basic leucine zipper factors (bZIP) {1.1}	42.98	26.78	14.29
PEAKS057211	CEBPA	Basic domains{1}	Basic leucine zipper factors (bZIP) {1.1}	68.76	35.94	44.74
PEAKS057212	CEBPB	Basic domains{1}	Basic leucine zipper factors (bZIP) {1.1}	38.2	17.74	40.4
PEAKS057213	CEBPB	Basic domains{1}	Basic leucine zipper factors (bZIP) {1.1}	54.98	20.37	13.42
PEAKS057221	BCL6	Zinc-coordinating DNA-binding domains{2}	C2H2 zinc finger factors {2.3}	14.09	7.38	10.36
PEAKS057223	ESR1	Zinc-coordinating DNA-binding domains{2}	Nuclear receptors with C4 zinc fingers {2.1}	31.33	10.83	48.21
PEAKS057419	AR	Zinc-coordinating DNA-binding domains{2}	Nuclear receptors with C4 zinc fingers {2.1}	6.33	0	11.6
PEAKS057422	FOXA1	Helix-turn-helix domains{3}	Fork head / winged helix factors {3.3}	47.24	28.32	15.14
PEAKS057424	FOXA1	Helix-turn-helix domains{3}	Fork head / winged helix factors {3.3}	32.48	22.18	11.3
PEAKS057426	FOXA1	Helix-turn-helix domains{3}	Fork head / winged helix factors {3.3}	48.06	28.07	16.34
PEAKS057427	NR1D1	Zinc-coordinating DNA-binding domains{2}	Nuclear receptors with C4 zinc fingers {2.1}	0	0	13.45
PEAKS057429	NR1D1	Zinc-coordinating DNA-binding domains{2}	Nuclear receptors with C4 zinc fingers {2.1}	10.69	6.77	29.26
PEAKS057430	NR1D1	Zinc-coordinating DNA-binding domains{2}	Nuclear receptors with C4 zinc fingers {2.1}	7.51	0	5.73
PEAKS057444	ESR1	Zinc-coordinating DNA-binding domains{2}	Nuclear receptors with C4 zinc fingers {2.1}	25.47	16.52	11.68
PEAKS057460	GATA4	Zinc-coordinating DNA-binding domains{2}	C4 zinc finger-type factors {2.2}	0	0	9.3
PEAKS057461	GATA4	Zinc-coordinating DNA-binding domains{2}	C4 zinc finger-type factors {2.2}	8.2	5.26	5.74
PEAKS057462	GATA4	Zinc-coordinating DNA-binding domains{2}	C4 zinc finger-type factors {2.2}	0	0	11
PEAKS057463	GATA4	Zinc-coordinating DNA-binding domains{2}	C4 zinc finger-type factors {2.2}	0	0	15.32
PEAKS057465	GATA4	Zinc-coordinating DNA-binding domains{2}	C4 zinc finger-type factors {2.2}	0	0	15.23
PEAKS057471	TBX5	Immunoglobulin fold{6}	T-Box factors {6.5}	10.52	8.82	13.59
PEAKS057472	TBX5	Immunoglobulin fold{6}	T-Box factors {6.5}	32.58	12.12	23.62
PEAKS057473	TBX5	Immunoglobulin fold{6}	T-Box factors {6.5}	19.9	15.34	12.04
PEAKS057476	TBX5	Immunoglobulin fold{6}	T-Box factors {6.5}	19.71	9.78	18.4
PEAKS057535	CTCF	Zinc-coordinating DNA-binding domains{2}	C2H2 zinc finger factors {2.3}	35.33	17.69	16.28
PEAKS057536	CTCF	Zinc-coordinating DNA-binding domains{2}	C2H2 zinc finger factors {2.3}	24.83	17.56	9.11
PEAKS057537	CTCF	Zinc-coordinating DNA-binding domains{2}	C2H2 zinc finger factors {2.3}	37.12	25.37	9.46
PEAKS057538	CTCF	Zinc-coordinating DNA-binding domains{2}	C2H2 zinc finger factors {2.3}	29.12	19.07	25.9
PEAKS057539	CTCF	Zinc-coordinating DNA-binding domains{2}	C2H2 zinc finger factors {2.3}	35.89	16.89	11.83
PEAKS057547	ARNTL	Basic domains{1}	Basic helix-loop-helix factors (bHLH) {1.2}	66.64	38.24	7.87
PEAKS057548	ARNTL	Basic domains{1}	Basic helix-loop-helix factors (bHLH) {1.2}	105.95	49.46	19.27
PEAKS057549	ARNTL	Basic domains{1}	Basic helix-loop-helix factors (bHLH) {1.2}	33.19	14.86	7.42
PEAKS057550	ARNTL	Basic domains{1}	Basic helix-loop-helix factors (bHLH) {1.2}	32.94	31.11	7.66
PEAKS057551	ARNTL	Basic domains{1}	Basic helix-loop-helix factors (bHLH) {1.2}	30.32	9.87	35.95
PEAKS057553	ARNTL	Basic domains{1}	Basic helix-loop-helix factors (bHLH) {1.2}	149.77	84.57	0
PEAKS057554	ARNTL	Basic domains{1}	Basic helix-loop-helix factors (bHLH) {1.2}	119.22	54.17	15.19
PEAKS057572	STAT6	Immunoglobulin fold{6}	STAT domain factors {6.2}	101.37	50	14.9
PEAKS057576	BHLHE40	Basic domains{1}	Basic helix-loop-helix factors (bHLH) {1.2}	172.56	91.24	18.63
PEAKS057617	EGR1	Zinc-coordinating DNA-binding domains{2}	C2H2 zinc finger factors {2.3}	39.96	25.46	0
PEAKS058091	SPI1	Helix-turn-helix domains{3}	Tryptophan cluster factors {3.5}	39.05	20.82	0
PEAKS058093	SPI1	Helix-turn-helix domains{3}	Tryptophan cluster factors {3.5}	37.34	21.83	5.85
PEAKS058096	CTCF	Zinc-coordinating DNA-binding domains{2}	C2H2 zinc finger factors {2.3}	46.71	24.1	10.78
PEAKS058108	MEF2D	α-Helices exposed by beta-structures{5}	MADS box factors {5.1}	9.55	5.66	9.63
PEAKS059094	HNF4A	Zinc-coordinating DNA-binding domains{2}	Nuclear receptors with C4 zinc fingers {2.1}	20.74	10.32	12.37
PEAKS059097	HNF4A	Zinc-coordinating DNA-binding domains{2}	Nuclear receptors with C4 zinc fingers {2.1}	28.91	18.71	15.85
PEAKS059098	CEBPA	Basic domains{1}	Basic leucine zipper factors (bZIP) {1.1}	52.33	22.06	14.76
PEAKS059099	CEBPA	Basic domains{1}	Basic leucine zipper factors (bZIP) {1.1}	44.66	19.55	-29.26
PEAKS059100	CEBPA	Basic domains{1}	Basic leucine zipper factors (bZIP) {1.1}	51.48	30.82	0
PEAKS059101	CEBPA	Basic domains{1}	Basic leucine zipper factors (bZIP) {1.1}	57.18	28.89	0
PEAKS059241	MYOD1	Basic domains{1}	Basic helix-loop-helix factors (bHLH) {1.2}	30.38	9.98	0
PEAKS059242	MYOD1	Basic domains{1}	Basic helix-loop-helix factors (bHLH) {1.2}	17.04	6.98	14.25
PEAKS059247	RELA	Immunoglobulin fold{6}	Rel homology region (RHR) factors {6.1}	6.97	0	19.75
PEAKS059294	ZBTB7B	Zinc-coordinating DNA-binding domains{2}	C2H2 zinc finger factors {2.3}	32.54	29.41	11.36
PEAKS059302	CTCF	Zinc-coordinating DNA-binding domains{2}	C2H2 zinc finger factors {2.3}	26.6	19.11	74.53
PEAKS059309	NKX2-2	Helix-turn-helix domains{3}	Homeo domain factors {3.1}	15.67	10.41	5.73
PEAKS035212	STAT6	Immunoglobulin fold{6}	STAT domain factors {6.2}	78.37	56.81	5.24
PEAKS035220	NR5A2	Zinc-coordinating DNA-binding domains{2}	Nuclear receptors with C4 zinc fingers {2.1}	23.41	8.95	19.01
PEAKS035347	STAT1	Immunoglobulin fold{6}	STAT domain factors {6.2}	22.56	7.66	23.05
PEAKS035431	HOXA9	Helix-turn-helix domains{3}	Homeo domain factors {3.1}	11.47	6.32	7.99
PEAKS035556	PAX5	Helix-turn-helix domains{3}	Paired box factors {3.2}	20.01	10.7	0
PEAKS035615	CEBPB	Basic domains{1}	Basic leucine zipper factors (bZIP) {1.1}	92.82	66.87	0
PEAKS035784	NR1D2	Zinc-coordinating DNA-binding domains{2}	Nuclear receptors with C4 zinc fingers {2.1}	6.72	6.48	5.1
PEAKS035802	TBX3	Immunoglobulin fold{6}	T-Box factors {6.5}	10.35	7.74	0
PEAKS035852	E2F1	Helix-turn-helix domains{3}	Fork head / winged helix factors {3.3}	22.13	15.31	7.87
PEAKS035891	RELB	Immunoglobulin fold{6}	Rel homology region (RHR) factors {6.1}	14.72	0	0
PEAKS035894	RELA	Immunoglobulin fold{6}	Rel homology region (RHR) factors {6.1}	9.19	5.17	0
PEAKS035900	STAT3	Immunoglobulin fold{6}	STAT domain factors {6.2}	9.22	0	5.67
PEAKS035917	EGR1	Zinc-coordinating DNA-binding domains{2}	C2H2 zinc finger factors {2.3}	16.19	10.11	6.92
PEAKS036040	BATF	Basic domains{1}	Basic leucine zipper factors (bZIP) {1.1}	7.21	0	16.48
PEAKS036048	JUN	Basic domains{1}	Basic leucine zipper factors (bZIP) {1.1}	0	0	6.92
PEAKS036078	ELF1	Helix-turn-helix domains{3}	Tryptophan cluster factors {3.5}	73.11	34.22	14.6
PEAKS036080	ETS1	Helix-turn-helix domains{3}	Tryptophan cluster factors {3.5}	16.46	8.58	11.94
PEAKS036081	ETS1	Helix-turn-helix domains{3}	Tryptophan cluster factors {3.5}	23.52	8.18	0
PEAKS036102	PPARG	Zinc-coordinating DNA-binding domains{2}	Nuclear receptors with C4 zinc fingers {2.1}	31.34	18.85	17.63
PEAKS036103	PPARG	Zinc-coordinating DNA-binding domains{2}	Nuclear receptors with C4 zinc fingers {2.1}	36.14	23.81	0
PEAKS036175	CTCF	Zinc-coordinating DNA-binding domains{2}	C2H2 zinc finger factors {2.3}	36.23	19.69	0
PEAKS036206	CEBPB	Basic domains{1}	Basic leucine zipper factors (bZIP) {1.1}	184.89	106.25	0
PEAKS036222	ESR1	Zinc-coordinating DNA-binding domains{2}	Nuclear receptors with C4 zinc fingers {2.1}	5.1	0	11.97
PEAKS036234	EGR2	Zinc-coordinating DNA-binding domains{2}	C2H2 zinc finger factors {2.3}	15.3	15.26	11.5
PEAKS036317	CEBPA	Basic domains{1}	Basic leucine zipper factors (bZIP) {1.1}	41.87	22.49	0
PEAKS036342	RUNX3	Immunoglobulin fold{6}	Runt domain factors {6.4}	23.99	16.76	12.79
PEAKS036450	RXRA	Zinc-coordinating DNA-binding domains{2}	Nuclear receptors with C4 zinc fingers {2.1}	15.19	8.63	10.9
PEAKS036638	OTX2	Helix-turn-helix domains{3}	Homeo domain factors {3.1}	21.11	16.18	16.36
PEAKS036887	RUNX1	Immunoglobulin fold{6}	Runt domain factors {6.4}	0	0	14.17
PEAKS037135	SMAD4	β-Hairpin exposed by an α/β-scaffold{7}	SMAD/NF-1 DNA-binding domain factors {7.1}	12.37	6.01	8.86
PEAKS037162	CTCF	Zinc-coordinating DNA-binding domains{2}	C2H2 zinc finger factors {2.3}	44.41	23.51	8.48
PEAKS037269	NR3C1	Zinc-coordinating DNA-binding domains{2}	Nuclear receptors with C4 zinc fingers {2.1}	15.73	8.41	8.43
PEAKS037285	NFATC2	Immunoglobulin fold{6}	Rel homology region (RHR) factors {6.1}	18.34	9.74	57.69
PEAKS037378	ZIC1	Zinc-coordinating DNA-binding domains{2}	C2H2 zinc finger factors {2.3}	26.28	11.18	41.84
PEAKS037410	IKZF1	Zinc-coordinating DNA-binding domains{2}	C2H2 zinc finger factors {2.3}	10.35	6.26	43.41
PEAKS037448	MEF2D	α-Helices exposed by beta-structures{5}	MADS box factors {5.1}	12.19	5.87	53.43
PEAKS037538	RELA	Immunoglobulin fold{6}	Rel homology region (RHR) factors {6.1}	12.4	6.53	69.75
PEAKS037702	PPARG	Zinc-coordinating DNA-binding domains{2}	Nuclear receptors with C4 zinc fingers {2.1}	20.42	12.06	59.13
PEAKS037703	PPARG	Zinc-coordinating DNA-binding domains{2}	Nuclear receptors with C4 zinc fingers {2.1}	38.88	27.11	62.05
PEAKS037705	NR3C1	Zinc-coordinating DNA-binding domains{2}	Nuclear receptors with C4 zinc fingers {2.1}	18.18	5.62	51.18
PEAKS037788	CEBPA	Basic domains{1}	Basic leucine zipper factors (bZIP) {1.1}	158.33	87.86	25.2
PEAKS037800	STAT3	Immunoglobulin fold{6}	STAT domain factors {6.2}	14.84	5.3	14.32
PEAKS037870	MEF2C	α-Helices exposed by beta-structures{5}	MADS box factors {5.1}	38.07	19.33	31.52
PEAKS037871	MEF2C	α-Helices exposed by beta-structures{5}	MADS box factors {5.1}	43.83	23.77	58.9
PEAKS037876	BATF3	Basic domains{1}	Basic leucine zipper factors (bZIP) {1.1}	0	0	9.29
PEAKS037886	PAX6	Helix-turn-helix domains{3}	Paired box factors {3.2}	17.25	9.88	0
PEAKS037887	PAX6	Helix-turn-helix domains{3}	Paired box factors {3.2}	19.98	14.48	8.71
PEAKS037963	NEUROD2	Basic domains{1}	Basic helix-loop-helix factors (bHLH) {1.2}	35.84	23.77	6.92
PEAKS037987	NR1D1	Zinc-coordinating DNA-binding domains{2}	Nuclear receptors with C4 zinc fingers {2.1}	0	0	11.28
PEAKS038015	RFX2	Helix-turn-helix domains{3}	Fork head / winged helix factors {3.3}	23.52	13.77	11.22
PEAKS038136	VDR	Zinc-coordinating DNA-binding domains{2}	Nuclear receptors with C4 zinc fingers {2.1}	28	12.28	5.98
PEAKS038138	EBF1	Immunoglobulin fold{6}	Rel homology region (RHR) factors {6.1}	128.7	86.99	0
PEAKS038164	NR5A1	Zinc-coordinating DNA-binding domains{2}	Nuclear receptors with C4 zinc fingers {2.1}	24.19	10.1	8.55
[truncated: 132 more rows]

## Sheet: Table_S8
Table S8. The significances of of asymmetry within homotypic CEs for various thresholds of asymmetry ratio (TAR) for the the benchmark collection of A. thaliana ChIP-seq data
[truncated: 76 more rows]

[truncated: 2 more sheets: Table_S9, Table_S10]
